# Supplementary material for: Acute kidney injury in Ugandan children with severe malaria is associated with long-term behavioral problems
Source: PLoS One. 2019 Dec 17;14(12):e0226405. doi: 10.1371/journal.pone.0226405 (PMC6917349; doi:10.1371/journal.pone.0226405)
Supplement: S1 Data — File containing primary data used in the analysis in wide and long format, and an accompanying codebook. (XLS) [file pone.0226405.s001.xls]

## Sheet: Wide Dataset
studyid	agefin00	sex	fevedays	group	sgroup	haz	waz	whz	totalses	preschool_education	educm	sickler	hivscr	coma	jaun	sma	hypoglyc	shock	lods	seizeno	pcr_fal0	aki0	prerenal	lacidosis	ivfluids	transfus	parenteral_art	year
1	4	1	1	1	CM	-3.92	-3.5	-2.13	8	0	Primary 7	0	0	1	0	0	0	0	2	2		0	1	0	0	0	0	1
2	4.72827	2		3		1.37	0.68	-0.02	9	1	Primary 7	0	0					0			0							0
3	3.35113	2	3	1	CM	-1.23	-1.78	-1.18	8	0	Primary 6 or lower	0	0	1	0	0	0	0	2	2		0	1		1	0	0	0
6	3.16496	2	2	1	CM	0.03	-2.23	-2.52	7	0	Primary 6 or lower	0	0	1	1	1	0	0	2	7		1	1	0	1	1	0	1
7	3.30459	2	3	1	CM	-2.54	-1.2	0.46	7	0	Not known	0		1	0	0	0	0	2	2		1	1	0	0	0	0	1
8	4.08214	1	3	2	SMA	-0.72	-1.2	-0.94	7	1	Not known	0	0	0	1	1	0	0	1	0		0	1	0	1	1	1	1
9	4.8898	2	3	1	CM	0.53	-1.28	-1.99	7	0	Primary 7	0	0	1	0	0	0	0	2	0		1	1	1	0	0	0	1
11	1.85626	1	5	1	CM	-0.24	-0.92	-1.01	8	0	Primary 6 or lower	0	0	1	1	1	0	0	2	0		1	1	0	1	1	0	1
12	1.95483	1	4	1	CM	0.2	-1.84	-2.58	8	0	Primary 7	0	0	1	1	1	1	0	2	1		0	1	0	1	1	1	1
13	5.13347	1	4	2	SMA	-1.2	-1.34	-0.76	9	0	Secondary or higher	1	0	0	1	1	0	0	0	0		0	0	0	1	1	0	1
14	2.5024	2	4	2	SMA	-2.86	-0.68	1.09	8	0	Primary 6 or lower	0	0	0	1	1	0	0	0	0		1	1	0	1	1	0	0
15	1.54689	1		3		-1.28	-0.48	0.31	8	0	Secondary or higher	0	0					0			0							1
17	5.72758	2		3		-0.94	-0.92	-0.49	11	1	Primary 6 or lower	0	0					0			0							1
19	1.56879	1	5	2	SMA	-0.36	-3.01	-3.76	11	0	Secondary or higher	0	0	0	1	1	0	0	0	0		0	1	0	1	1	0	0
21	1.68378	1	3	2	SMA	-0.11	-1.51	-1.9	13	0	Primary 7	0	0	0	1	1	0	0	0	0		0	1	0	1	1	0	1
23	2.00137	1	3	2	SMA	-1.06	-0.44	0.27	10	0	Not known	0	0	0	1	1	0	0	0	0		0	1	0	1	1	0	0
24	4.67351	2	4	2	SMA	-0.15	-1.61	-1.85	7	1	Not known	0	0	0	0	1	0	0	1	0		0	1	0	1	1	0	1
28	3.13758	1	4	1	CM	-3.05	-2.96	-1.77	10	0	Secondary or higher	0	0	1	1	1	0	0	3	2		1	1	1	1	1	0	1
30	1.95209	1	3	1	CM	-0.22	-2.59	-3.36	4	0	Secondary or higher	0	0	1	1	1	0	0	2	0		1	1	1	1	1	0	1
34	1.9603	1	7	1	CM	-4.11	-2.61	-0.49	4	0	Primary 6 or lower	0	0	1	0	1	0	0	2	0		1	1	0	1	1	0	1
35	2.63107	1	2	1	CM	-0.08	0.73	1.03	12	0	Primary 6 or lower	0	0	1	1	1	0	0	2	0		1	1	0	1	1	0	1
36	3.07734	2	3	1	CM	0.2	1.43	1.89	7	0	Primary 7	0	0	1	0	0	0	0	2	2		1	0	0	1	0	0	1
39	2.81725	1	2	1	CM	-3.6	-0.71	1.47	9	0	Primary 6 or lower	0	0	1	0	1	0	0	2	1		1	1	1	1	1	0	1
40	2.423	1	3	2	SMA	-0.44	-1.71	-1.59			Not known	1	0	0	1	1	0	0	0	0		0	1	0	1	1	0	1
42	2.83094	2		3		-0.13	0.67	1.09	6	1	Primary 6 or lower	0	0					0			1							1
43	5.82615	2	4	1	CM	0.97	-0.51	-1.68	7	1	Primary 7	0	0	1	1	0	0	0	2	1		0	1	0	0	0	0	1
44	2.21766	1	2	2	SMA	-0.95	-1.44	-0.87	11	0	Secondary or higher	0	0	0	1	1	0	0	0	0		1	1	0	1	1	1	1
45	4.04381	1		3		-2.75	-0.41	1.63	8	1	Primary 6 or lower	0	0					0			1							0
46	1.7796	2	3	2	SMA	-5.13	-4.04	-1.56	13	0	Primary 6 or lower	0	0	0	0	1	0	0	1	1		1	1	0	1	1	0	1
50	4.1013	2	2	1	CM	-0.01	-0.62	-0.64	9	0	Primary 6 or lower	0	0	1	0	0	0	0	2	11		1	1	0	1	1	0	1
51	1.96304	1	2	2	SMA	-0.73	-1.09	-0.91	6	0	Secondary or higher	0	0	0	1	1	0	0	1	0		1	1	0	1	1	1	1
52	4.19986	2	3	1	CM	-0.65	-1.28	-1.01	15	0	Secondary or higher	0	0	1	0	1	0	0	2	1		1	1	1	1	1	0	1
53	6.16564	1	2	1	CM	-1.74	-1.63	-0.66	8	1	Primary 6 or lower	0	0	1	0	0	0	0	2	0		1	0	0	0	0	0	1
54	3.89322	2	7	2	SMA	-2.94	-2.84	-1.52	4	0	Not known	0	0	0	1	1	0	0	1	0		1	1	0	1	1	0	1
56	1.79055	1	30	2	SMA	-1.38	-0.88	-0.14	14	0	Primary 7	0	0	0	0	1	0	0	0	0		0	1	0	1	1	0	0
57	2.67214	1	4	2	SMA	-3.85	-0.6	1.72	7	0	Secondary or higher	0	0	0	1	1		0	1	0		1	0	1	1	1	0	0
59	5.8371	1	3	2	SMA	0.63	-1	-1.92	9	1	Primary 7	0	0	0	1	1	0	0	0	0		0	1	0	1	1	0	1
62	4.58042	2	7	2	SMA	-0.61	0.79	1.63	7	1	Primary 6 or lower	0	0	0	0	1	0	0	0	0		0	1	0	1	1	0	0
63	2.55168	1	7	2	SMA	-5.03	-4.13	-1.67	9	0	Primary 6 or lower	0	0	0	0	1	0	0	0	0		1	1	1	1	1	0	0
64	1.9384	1	7	2	SMA	-0.36	-0.29	-0.04	15	0	Primary 6 or lower	1	0	0	0	1	0	0	0	0		1	1	1	1	1	0	1
66	2.23409	1	3	1	CM	-1.64	-2.27	-1.38	10	0	Primary 6 or lower	0	0	1	0	0	0	0	2	10		1	1	0	1	0	0	1
67	6.89117	1	2	1	CM	-2.14	-0.19	1.87	5	0	Primary 6 or lower	0	0	1	0	0	0	0	2	1		1	1	1	1	0	0	1
68	5.1718	1	3	1	CM	0.26	-0.91	-1.4	7	1	Not known	0	0	1	0	0	0	0	2	0		0	1	0	1	0	0	1
69	2.6694	1	3	1	CM	0.65	-1.26	-1.78	15	0	Secondary or higher	0	0	1	1	0	1	0	2	1		1	1	1	1	1	0	1
70	2.61739	2	4	2	SMA	0.57	-0.16	-0.39	10	0	Primary 6 or lower	0	0	0	0	1	0	0	0	0		0	1	0	1	1	0	1
71	1.83436	2	7	2	SMA	-1.39	-0.41	0.45	16	0	Primary 6 or lower	0	0	0	0	1	0	0	1	0		1	1	1	1	1	0	1
74	2.55989	2	21	2	SMA	-5.06	-3.79	-1.07	9	0	Primary 6 or lower	0	0	0	0	1		0	0	0		0	1	1	1	1	0	0
75	7.00068	1		3		-0.53	-0.32	0.08	9	1	Primary 6 or lower	0	0					0			1							1
76	4.04381	1	4	2	SMA	-1.33	1.09	2.62	9	0	Primary 7	1	0	0	1	1	0	0	0	0		0	0	0	1	1	0	0
77	2.2204	2	3	2	SMA	-1.7	-1.87	-0.96	9	0	Primary 6 or lower	0	0	0	1	1	0	0	0	0		1	1	1	1	1	0	0
78	2.40383	1		3		-0.05	-0.91	-0.9	8	0	Secondary or higher	0	0					0			1							1
79	4.13963	2	3	1	CM	-1.1	-1.84	-1.41	8	0	Primary 6 or lower	0	0	1	1	0	0	0	2	2		0	1	0	1	1	0	0
81	2.29158	2		3		-1.32	0.29	1.18	12	0	Secondary or higher	0	0					0			1							0
82	5.48392	2	5	1	CM	-0.29	-1.69	-2.03	9	1	Not known	0	0	1	0	0	0	0	2	1		1	1	0	1	0	0	1
83	2.79808	1	2	2	SMA	-0.98	-2.09	-1.84	10	0	Primary 7	0	0	0	0	1	0	0	0	0		1	1	0	1	1	0	0
84	5.34155	2		3		-0.56	0.59	1.26	7	1	Not known	0	0					0			1							1
86	4.38604	2	21	2	SMA	-0.53	-1.46	-1.35	10	1	Secondary or higher	0	0	0	1	1	0	0	1	0		0	1	0	1	1	0	0
88	1.96578	2	14	2	SMA	1.28	0.97	0.43	10	0	Secondary or higher	0	0	0	0	1	0	0	1	0		0	1	1	1	1	0	1
89	2.8063	1	3	1	CM	-0.03	-2.09	-2.43	9	0	Primary 7	0	0	1	0	0	0	0	2	0		0	1	0	1	0	0	0
93	3.81383	2	6	1	CM	-1.04	-1.57	-1.07	6	0	Primary 6 or lower	0	0	1	0	0	0	0	2	3		1	1	0	1	0	0	0
96	2.9076	1		3		0.24	-2.38	-2.98	9	0	Primary 6 or lower	0	0					0			1							1
97	1.97125	1	3	1	CM	1.31	-0.32	-1.26	9	0	Secondary or higher	0	0	1	1	1	0	0	2	0		1	1	1	1	1	0	1
98	2.8063	2		3		-1.44	-1.19	-0.24	10	0	Secondary or higher	0	0					0			1							1
100	4.36961	1	7	2	SMA	-0.44	-0.71	-0.51	9	0	Primary 6 or lower	0	0	0	1	1	0	0	0	0		0	0	0	1	1	0	1
104	3.1896	1	3	2	SMA	-2.56	-3.62	-3.12	8	0	Primary 6 or lower	0	0	0	0	1	0	0	0	0		0	1	0	1	1	0	0
105	1.78234	2	1	1	CM	-2.22	-1.18	-0.02	5	0	Primary 6 or lower	0	0	1	0	0	0	0	2	0		1	1	1	0	0	0	0
106	3.08282	2	2	1	CM	0.67	-1.5	-2.02	11	0	Primary 6 or lower	0	0	1	0	0	0	0	2	1		1	1	0	1	0	0	0
108	3.93703	1	4	1	CM	0.6	-1.35	-2.09	8	0	Secondary or higher	0	0	1	1	0	0	0	2	2		1	1	0	0	0	0	1
109	7.00068	1	3	2	SMA	-2.88	-2.22	-0.48	18	1	Secondary or higher	0	0	0	1	1	0	0	0	0		0	1	0	1	1	0	1
111	7.95619	1	2	1	CM	-1.19	-1.64	-1.2	9	1	Primary 7	0	0	1	0	1	0	0	2	0		0	1	1	1	1	0	1
113	2.07529	2	5	2	SMA	-0.51	0.02	0.36	10	0	Secondary or higher	0	0	0	0	1	0	0	0	0		0	1	0	1	1	0	1
115	2.31622	2	3	1	CM	-0.42	-1.99	-1.9	9	0	Secondary or higher	0	0	1	0	0	0	0	2	0		1	1	0	1	0	0	1
116	2.27242	2	3	1	CM	-0.24	-1.1	-0.97	12	0	Primary 6 or lower	0	0	1	0	1		0	2	2		1	1		1	1	0	0
117	8.64613	1	7	1	CM	-1.13	-0.3	0.76	9	1	Secondary or higher	0	0	1	0	0	0	0	2	1		0	1	0	0	0	0	0
118	5.94661	1	3	2	SMA	-0.56	0.67	1.48	8	1	Primary 6 or lower	0	0	0	1	1	0	0	0	0		1	1	0	1	1	0	0
119	6.13552	1	4	2	SMA	-1.39	-0.82	0.19	10	1	Primary 6 or lower	0	0	0	1	1		0	1	0		1	1	0	1	1	0	1
122	2.00137	1		3		0.59	-1.2	-1.5	7	1	Secondary or higher	0	0					0			1							1
123	1.71937	2		3		-0.62	-1.91	-2.12	9	0	Primary 7	0	0					0			0							1
125	3.70157	1	1	1	CM	-2.71	-1.67	-0.07	6	0	Primary 6 or lower	0	0	1	0	0	0	0	2	2		1	1	0	1	1	1	1
134	2.00137	1		3		-1.13	-2.97	-2.33	6	0	Primary 6 or lower	0	0					0			1							1
136	4	1		3		-1.4	-1.42	-0.74	10	0	Primary 7	0	0					0			1							1
137	4.14237	1	7	2	SMA	-0.81	-2.04	-2.05	8	0	Secondary or higher	0	0	0	1	1	0	0	1	0		1	1	1	1	1	0	1
139	1.81246	1	3	2	SMA	-1.67	-1.66	-1.06	8	0	Primary 7	0	0	0	0	1	0	0	2	0		0	1	1	1	1	0	1
141	3.43053	1	3	2	SMA	-0.32	-0.85	-0.74	8	0	Secondary or higher	0	0	0	1	1	0	0	1	0		1	1	1	1	1	1	1
142	4.08761	1	1	1	CM	-0.76	-0.93	-0.54	9	1	Primary 6 or lower	0	0	1	0	0	0	0	2	1		1	1	0	1	1	1	1
143	8.64613	1		3		-1.68	-1.73	-0.86	14	1	Primary 6 or lower	0	0					0			0							1
149	2.1191	2	3	2	SMA	-1.87	-1.63	-0.56	7	0	Primary 6 or lower	0	0	0	0	1	0	0	1	0		0	1	0	1	1	0	1
150	1.84805	1	4	2	SMA	-2.09	-1.71	-0.83	8	0	Secondary or higher	0	0	0	1	1	1	0	1	0		1	1	1	1	1	0	1
152	3.49076	2	3	1	CM	0.88	-0.12	-0.6	9	0	Secondary or higher	0	0	1	0	0	0	0	2	1		0	1	0	1	1	0	1
153	3.24162	1		3		-2.31	-1.81	-0.6	9	0	Secondary or higher	0	0					0			1							1
155	1.8152	2		3		-1.72	-0.75	0.22	8	0	Primary 7	0	0					0			0							1
158	3.95346	1	3	1	CM	-1.49	-1.34	-0.55	8	0	Primary 6 or lower	0	0	1	1	1	0	0	3	2		1	1	1	1	1	1	1
165	2.92676	1		3		-2.2	-0.93	0.45	6	0	Primary 6 or lower	0	0					0			1							1
168	2.31348	1	7	2	SMA	-1.13	0.59	1.37	14	0	Secondary or higher	0	1	0	1	1	0	0	0	0		0	1	1	1	1	1	1
172	2.23409	2	4	1	CM	-0.6	-1.04	-0.68	6	0	Primary 6 or lower	0	0	1	1	1	0	0	3	2		1	1	1	1	1	1	1
173	2.67214	1	7	2	SMA	-1.09	-0.57	0.17	9	0	Primary 6 or lower	0	0	0	1	1	0	0	0	0		0	1		1	1	0	1
174	8.99932	2		3		-2.19	-1.46	0.45	9	1	Secondary or higher	0	0					0			1							1
177	1.71663	1	3	2	SMA	-0.17	-1.54	-1.9	4	0	Primary 6 or lower	0	0	0	0	1	0	0	1	0		0	1	0	1	1	0	1
180	3.69884	2	3	2	SMA	-0.82	-0.85	-0.28	7	0	Primary 6 or lower	1	0	0	1	1	0	0	0	0		0	1	0	1	1	0	1
183	1.64545	1	4	1	CM	-1.14	-3.05	-3.39	8	0	Primary 7	0	0	1	0	0	0	0	2	2		1	1	1	1	1	0	1
186	2.32444	2	4	2	SMA	-2.79	-2.38	-0.85	11	0	Primary 7	0	0	0	1	1	0	0	0	0		0	1	0	1	1	0	1
193	5.48939	1		3		-0.85	-1.06	-0.66	8	1	Secondary or higher	0	0					0			0							1
194	6.2204	1	7	2	SMA	-0.36	-1.24	-1.36	8	1	Secondary or higher	0	0	0	1	1	0	0	0	0		1	1	0	1	1	0	1
196	3.54004	1	3	1	CM	-2.42	-2.09	-0.95	8	0	Primary 7	0	0	1	0	0	1	0	2	1		0	1	0	1	0	0	1
197	3.33744	2	4	2	SMA	-0.36	0.62	1.24	8	0	Primary 7	0	0	0	0	1		0	0	0		0	0	0	1	1	0	1
200	1.83984	2	4	1	CM	-1.68	-2.05	-1.61	9	0	Secondary or higher	0	0	1	1	1	0	0	3	4		1	1	1	1	1	1	1
201	2.19028	1	7	2	SMA	0.15	-2.23	-2.39	15	0	Secondary or higher	0	0	0	1	1	0	0	2	0		0	1	1	1	1	0	1
206	2.28611	2	3	2	SMA	-0.87	-3.52	-3.45	7	0	Primary 7	0	0	0	1	1	0	0	1	0		0	1	0	1	1	0	1
209	2.55989	2	3	1	CM	-0.19	-0.8	-0.63	9	0	Primary 7	0	0	1	0	0	1	0	2	0		0	1	1	1	1	0	1
210	4	1		3		0.95	0.15	-0.48	8	1	Primary 6 or lower	0	0					0			1							1
211	1.76318	1	2	2	SMA	-1.55	-1.6	-1.06	6	0	Secondary or higher	0	0	0	1	1	0	0	1	0		0	1	1	1	1	0	1
212	2.83094	2	4	2	SMA	-3.9	-1.89	0.48	8	0	Primary 6 or lower	0	0	0	0	1	1	0	2	0		0	1	1	1	1	0	1
213	1.58522	1	2	2	SMA	0.12	-2.96	-3.94	7	0	Primary 7	0	0	0	1	1	0	0	2	0		1	1	0	1	1	0	1
214	3.1896	2	4	1	CM	0.82	-1.59	-2.21	3	0	Primary 6 or lower	0	0	1	1	0	0	0	2	2		1	1	0	1	1	1	1
215	3.16769	2		3		-1.01	1.02	2.2	9	0	Primary 7	0	0					0			0							1
218	2.62834	2	7	2	SMA	-2.19	-2.36	-1.25	8	0	Secondary or higher	0	0	0	0	1	0	0	1	0		1	1	1	1	1	0	1
224	3.20876	2		3		-3.07	-2.31	-0.59	8	0	Primary 7	0	0					0			0							1
226	3.33744	1	7	1	CM	-2.29	-2.41	-1.5	8	0	Not known	0	0	1	0	0	0	0	2	9		1	1	0	1	1	0	1
228	3.03901	2	3	1	CM	-0.4	-1.44	-1.27	7	0	Primary 6 or lower	0	0	1	0	1	0	0	2	2		1	1	1	1	1	0	1
229	3.90965	2		3		-1.49	-0.12	0.98	10	1	Secondary or higher	0	0					0			0							1
232	4.2026	1	4	2	SMA	-0.85	-1.02	-0.6	9	1	Secondary or higher	0	0	0	0	1	0	0	0	0		0	1	1	1	1	0	1
233	3.718	2	4	2	SMA	-1.11	-0.87	-0.08	7	0	Not known	0	0	0	0	1	0	0	0	0		0	1	0	1	1	0	1
234	4.99932	2	3	2	SMA	1.33	-0.31	-1.51	14	1	Primary 6 or lower	0	0	0	1	1	0	0	0	0		0	1	1	1	1	0	1
236	3.90418	1	4	2	SMA	-0.96	0.77	1.86	7	0	Primary 7	0	0	0	1	1	0	0	1	0		1	1	0	1	1	1	1
238	3.32101	1	5	2	SMA	0.17	-2.49	-3.18	9	0	Secondary or higher	0	0	0	1	1	0	0	0	0		0	1	1	1	1	0	1
244	4.00821	1	5	1	CM	0.8	-1.38	-2.27	9	0	Secondary or higher	0	0	1	1	0	0	0	2	0		0	1	0	0	0	0	2
247	2.88022	1	1	1	CM	0.41	-0.31	-0.52	8	0	Primary 6 or lower	0	0	1	1	0	0	0	2	3		1	1	1	1	1	0	2
248	4.02464	1	3	1	CM	-1.73	-2.36	-1.87	8	0	Secondary or higher	0	0	1	1	1	0	0	2	1		1	1	0	1	1	1	2
249	2.59548	1	1	1	CM	0.34	-0.43	-0.61	9	0	Primary 6 or lower	0	0	1	1	0	0	0	2	3		0	0	0	0	0	0	2
250	4.16153	1	4	2	SMA	-1.81	-2.55	-2.11	8	0	Primary 7	0	0	0	1	1	0	0	2	0		1	1	1	1	1	0	2
251	5.13621	1	3	2	SMA	-2.06	-0.87	0.64	9	0	Primary 6 or lower	0	0	0	1	1		0	0	0		1	1	0	1	1	0	2
252	2.18754	1	4	2	SMA	-1.72	-2.24	-1.28	9	0	Primary 6 or lower	0	0	0	1	1	0	0	1	0		0	1	0	1	1	0	2
255	3.34565	1	5	1	CM	1.66	0.4	-0.58	11	1	Secondary or higher	0	0	1	1	0	0	0	2	2		1	1	0	0	0	0	2
258	2.25599	2		3		0.21	0.48	0.54	7	1	Primary 7	0	0					0			1							2
264	3.93977	2	7	1	CM	-0.58	-1.04	-0.72	8	1	Not known	0	0	1	1	0	0	0	2	1		1	1	1	1	1	1	2
265	2.71595	2		3		-2.26	-0.29	1.21	8	0	Secondary or higher	0	0					0			1							2
276	4.58042	2	4	2	SMA	-0.3	-1.57	-1.69	7	1	Primary 6 or lower	0	0	0	1	1	0	0	1	0		0	1	0	1	1	0	2
277	3.71253	2		3		0.88	0.64	0.42	7	1	Primary 7	0	0					0			0							2
279	4.11773	1	7	1	CM	-0.08	-1.99	-2.47	7	0	Primary 6 or lower	0	0	1	1	1	0	0	2	1		0	1	1	1	1	0	2
280	3.15948	2	3	2	SMA	0.09	-0.86	-0.89	21	0	Secondary or higher	0	0	0	1	1	0	0	1	0		1	1	1	1	1	0	2
282	7.00068	1	4	1	CM	0.77	-0.42	-1.42	8	1	Not known	0	1	1	0	0	0	0	2	1		1	1	0	1	0	0	2
283	4.80219	1		3		-1.02	-0.62	0.09	6	1	Primary 7	0	0					0			0							2
287	6.73511	1	2	2	SMA	-0.19	-0.62	-0.69	7	1	Secondary or higher	0	0	0	1	1	0	0	0	0		0	1	1	1	1	0	2
290	2.64476	2	4	1	CM	-0.08	-1.48	-1.52	11	0	Primary 7	0	0	1	1	0	0	0	2	0		1	1	0	1	1	1	2
291	5.31143	1	4	1	CM	-2.03	-1.45	-0.2	7	1	Primary 7	0	0	1	1	0	0	1	2	0		1	1	1	0	0	0	2
302	4.16701	1		3		-2.82	0.03	2.3	7	0	Not known	0	0					0			1							1
303	10.5462	2	3	2	SMA	0.55	-0.54		15	1	Secondary or higher	1	0	0	1	1	0	0	1	0		0	1	0	1	1	0	1
305	9.97947	1	5	1	CM	-0.39	-1.13	-1.35	8	1	Primary 7	0	0	1	1	0	0	0	2	1		1	1	0	1	1	0	1
306	3.40041	1	2	2	SMA	0.37	-0.78	-1.13	7	0	Secondary or higher	0	0	0	1	1	0	0	0	0		0	1	0	1	1	1	2
307	2.8282	2	1	2	SMA	0.55	0.03	-0.13	10	0	Secondary or higher	0	0	0	1	1	1	0	1	0		1	1	1	1	1	0	2
308	4.03012	1	2	1	CM	-0.72	-3.62	-4.29	9	0	Secondary or higher	0	0	1	1	0	0	0	2	1		1	1	0	0	0	0	2
310	3.94524	1	2	1	CM	-1.14	-1.85	-1.56	11	0	Secondary or higher	0	0	1	1	0	1	0	2	0		0	1	0	0	0	0	2
311	7.80835	1	1	1	CM	-0.19	-1.24	-1.62	9	1	Secondary or higher	0	0	1	0	0	0	0	2	0		0	1	0	0	0	0	2
312	3.58932	2	3	1	CM	-3.62	-0.07	2.5	9	0	Primary 7	0	1	1	0	0	1	0	2	5		1	1	1	1	1	0	2
314	4.19713	2	2	2	SMA	-2.37	-1.28	0.25	15	0	Secondary or higher	0	0	0	1	1	0	0	1	0		0	1	1	1	1	0	1
315	3.49624	1	4	1	CM	-0.56	-1.25	-1.11	11	0	Secondary or higher	0	0	1	1	1	0	0	2	0		1	1	1	1	1	0	2
317	1.82615	2	7	2	SMA	-1.71	-2.03	-1.57	15	0	Secondary or higher	0	0	0	1	1	0	0	1	0		1	1	1	1	1	0	1
318	10.9541	2		3		-0.79	-0.85		7	1	Secondary or higher	0	0					0			1							2
320	1.87269	2		3		-1.56	-1.09	-0.37	10	0	Secondary or higher	0	0					0			1							1
321	5.03491	1	5	2	SMA	-0.85	-2.4	-2.53	11	1	Primary 7	1	0	0	1	1	0	0	0	0		1	0	0	1	1	1	1
322	2.49144	2	1	1	CM	-0.59	-0.94	-0.54	8	0	Secondary or higher	0	0	1	1	1	0	0	2	3		1	1	0	1	1	1	1
323	9.56331	1	3	1	CM	-2.46	-1.6	0.26	7	1	Secondary or higher	0	1	1	0	0	0	0	2	1		1	1	0	1	1	0	1
324	3.01711	2	4	2	SMA	-2.44	-2.06	-0.68	4	0	Primary 6 or lower	0	0	0	1	1	0	0	1	0		1	1	0	1	1	0	2
325	5.00753	2	4	1	CM	2.71	-1.87	-4.18	14	1	Secondary or higher	0	0	1	1	0	0	0	2	1		1	1	0	1	1	0	2
327	1.65092	1	3	2	SMA	0.06	-2.01	-2.68	13	0	Primary 6 or lower	0	0	0	1	1		0	1	0		0	1	0	1	1	0	2
329	1.93566	1	2	1	CM	0.51	-0.25	-0.6	9	0	Secondary or higher	0	0	1	1	0	0	0	3	0		1	1	1	1	1	1	1
330	2.987	1	5	1	CM	0.11	-1.92	-2.35	9	0	Secondary or higher	0	0	1	1	0	0	0	2	1		0	1	1	1	1	1	1
331	2.51335	1	4	2	SMA	-1.16	-2.5	-2.13	7	0	Primary 7	0	0	0	1	1	0	0	1	0		0	1	1	1	1	0	1
332	2.36824	1	7	1	CM	1.22	-2.01	-2.84	12	0	Primary 7	0	0	1	1	1	0	0	2	1		0	1	0	1	1	0	1
333	1.82888	1	3	2	SMA	-4.52	-3.13	-0.73	7	0	Primary 7	0	0	0	1	1	0	0	1	0		1	1	1	1	1	0	1
334	4.37782	1	4	1	CM	-1.11	-1.7	-1.36	8	0	Primary 6 or lower	0	0	1	1	0	0	0	2	0		1	1	0	1	1	0	2
335	1.81246	1	7	2	SMA	0.78	0.12	-0.3	7	0	Secondary or higher	0	0	0	1	1	0	0	1	0		1	1	1	1	1	0	1
336	2.54073	1	2	1	CM	0.72	-1.82	-2.43	8	0	Primary 7	0	0	1	1	0	1	0	2	1		0	1	1	1	1	1	2
340	9.57153	1	2	2	SMA	-1.77	-2.08	-1.58	14	1	Primary 7	1	0	0	1	1	1	0	2	0		1	1	1	1	1	0	2
341	2.49692	1	3	1	CM	-0.15	-0.43	-0.28	5	0	Primary 6 or lower	0	0	1	1	0	0	0	2	4		0	1	1	1	1	1	2
342	6.12731	2	4	1	CM	-1.43	-2.05	-1.69	16	1	Not known	0	0	1	0	0	0	0	2	0		0	1	0	0	0	0	2
343	6.97604	1	3	1	CM	0.14	-2.26	-3.3	7	1	Primary 7	0	0	1	1	0	0	0	2	3		1	1	0	1	1	0	2
344	5.40726	1	2	1	CM	0.48	-0.64	-1.26	8	1	Primary 6 or lower	0	0	1	0	0	0	0	2	5		0	1	0	0	0	1	1
345	1.73032	1	6	2	SMA	-2.21	-2.34	-1.66	7	0	Primary 7	0	0	0	1	1	0	0	1	0		1	1	0	1	1	0	1
346	4.09582	2	3	1	CM	-0.2	-1.74	-1.87	7	1	Primary 6 or lower	0	0	1	1	0	0	0	2	1		1	1	1	1	0	0	1
347	3.34565	1	1	1	CM	-1.53	0.03	1.18	8	1	Primary 6 or lower	0	0	1	1	1	1	0	3	1		1	1	1	1	1	1	2
349	3.83299	1	2	1	CM	-1.79	-1.79	-0.98	7	0	Primary 7	0	0	1	1	1	0	0	2	0		1	1	1	1	1	0	1
350	3.40041	1	7	2	SMA	-1.87	0.37	1.84	11	0	Secondary or higher	0	0	0	1	1	0	0	1	0		0	1	0	1	1	0	2
351	1.92197	1	4	2	SMA	-0.45	-0.26	0.07	6	0	Secondary or higher	0	0	0	1	1	0	0	0	0		0	1	0	1	1	0	2
352	4.57769	2	3	2	SMA	-1.13	-2.02	-1.7	15	0	Primary 7	0	1	0	1	1	0	0	2	0		1	1	1	1	1	0	1
354	2.12183	2	5	1	CM	-0.27	-2.81	-3.54	6	0	Secondary or higher	0	0	1	0	1	0	0	2	1		0	1	0	1	1	0	1
355	5.08693	1	5	1	CM	0.77	-0.33	-1.08	12	1	Secondary or higher	0	0	1	1	0	0	0	2	0		1	1	0	0	0	1	2
359	4.5859	2		3		-1.64	0.02	1.22	6	1	Primary 6 or lower	0	0					0			1							1
360	3.60301	2		3		0.45	-0.28	-0.51	5	0	Primary 6 or lower	0	0					0			0							1
361	4.71184	2		3		-0.58	-1.06	-0.86	8	1	Secondary or higher	0	0					0			0							2
362	4.00548	1		3		-0.54	-1.42	-1.39	7	0	Primary 6 or lower	0	0					0			0							2
363	5.95483	2		3		-0.2	0.17	0.31	6	1	Primary 6 or lower	0	0					0			1							2
364	10.7625	2		3		-2.05	-1.64		12	1	Secondary or higher	0	0					0			1							2
365	5.06229	2	2	2	SMA	-2.06	-2.95	-2.41	10	1	Primary 6 or lower	1	0	0	1	1	0	0	0	0		0	1	1	1	1	0	2
366	5.99863	1		3		-1.66	-0.98	0.21	19	1	Secondary or higher	0	0					0			0							2
367	4.32854	1		3		1.06	0.3	-0.41	14	1	Primary 7	0	0					0			0							2
368	2.89117	2	3	2	SMA	-0.76	-1.27	-0.82	10	0	Secondary or higher	0	0	0	1	1	0	0	0	0		0	1	0	1	1	0	2
369	2.43669	1	4	1	CM	0.8	-0.23	-0.66	7	0	Primary 7	0	0	1	1	1	1	0	2	0		1	1	0	1	1	0	2
370	5.99863	2		3		0.48	0.08	-0.47	9	1	Not known	0	0					0			1							2
371	1.99863	2	3	2	SMA	-1.13	-2.23	-2.21	8	0	Primary 7	0	0	0	1	1	0	0	1	0		0	1	1	1	1	1	2
372	4.06571	2	2	1	CM	-0.84	-2.89	-2.94	9	0	Primary 6 or lower	0	0	1	1	0	0	0	2	1		0	1	0	0	0	0	2
373	5.98768	2	3	1	CM	-1.39	-2.42	-2.25	8	1	Secondary or higher	0	0	1	0	0	0	0	2	0		0	1	1	0	0	0	2
374	2.49418	2	6	2	SMA	-0.38	-2.19	-2.18	10	1	Secondary or higher	0	0	0	1	1	0	0	1	0		0	1	1	1	1	0	2
375	4.62423	1	4	2	SMA	0.99	0.03	-0.76	12	0	Primary 7	0	0	0	1	1	0	0	0	0		0	1	1	1	1	1	2
376	4.91444	2		3		-3.09	-2.47	-0.93	8	1	Secondary or higher	0	0					0			0							2
377	5.10335	1		3		-2.08	-1.35	-0.01	6	1	Primary 6 or lower	0	0					0			1							2
378	6.17933	1		3		1.12	0.73	0.02	11	1	Secondary or higher	0	0					0										2
379	3.26078	1		3		-0.82	-0.28	0.35	19	0	Primary 7	0	0					0			0							2
380	1.62081	1	3	2	SMA	1.97	-1.38	-2.95	9	0	Secondary or higher	0	0	0	1	1	1	0	1	0		0	1	1	1	1	0	2
381	3.45791	1	3	1	CM	0.53	-0.87	-1.38	5	0	Secondary or higher	0	0	1	1	0	0	0	2	0		0	1	1	0	0	0	2
382	2.9514	1		3		-3.97	-2.86	-0.88	9	0	Secondary or higher	0	0					0										2
383	7.9206	2		3		-1.66	-2.05	-1.53	7	1	Secondary or higher	0	0					0			1							2
384	4.59959	2	1	1	CM	1.51	-1.04	-2.33	16	1	Secondary or higher	0	0	1	1	0	0	0	2	0		0	1	1	0	0	1	2
385	8.28474	2	3	1	CM	0.25	-0.41	-0.93	9	1	Primary 7	0	0	1	1	0	0	0	2	2		1	1	0	1	0	0	2
386	4.75291	1		3		-0.39	-0.57	-0.38	8	0	Not known	0	0					0			0							2
387	2.04517	2	5	1	CM	-1.96	-0.72	0.45	10	0	Primary 6 or lower	0	1	1	1	0	0	0	2	1		0	1	1	0	0	0	2
388	9.76044	1	4	1	CM	-0.27	-0.51	-0.4	13	1	Secondary or higher	0	0	1	0	0	0	0	2	1		0	1	0	0	0	1	2
389	5.20739	2		3		0.51	1.03	1.04	10	1	Secondary or higher	0	0					0			0							2
390	2.70773	2	3	1	CM	0.82	0.33	0.09	9	0	Primary 6 or lower	0	0	1	0	0	0	0	2	0		0	1	1	1	1	0	2
391	3.66051	2		3		-2.58	-1.76	-0.18	9	1	Secondary or higher	0	0					0			0							2
392	3.99179	2	3	2	SMA	-4.16	-1.7	0.94	11	0	Secondary or higher	0	0	0	1	1	0	0	0	0		0	0	0	1	1	0	2
393	2.23682	2	5	2	SMA	-1.35	-0.13	0.68	17	0	Secondary or higher	0	0	0	1	1	0	0	0	0		0	0	0	1	1	1	2
394	3.83847	2		3		-1.07	0.23	1.16	9	1	Primary 6 or lower	0	0					0			0							2
395	5.8371	1	1	1	CM	-1.01	-0.33	0.47	9	1	Primary 6 or lower	0	0	1	1	1	0	0	2	1		0	1	0	1	1	0	2
396	9.65092	1		3		-1.11	-1.25	-0.67	13	1	Secondary or higher	0	0					0			0							2
397	6.66667	1	5	1	CM	-1.13	-1.61	-1.17	11	1	Primary 6 or lower	0	0	1	1	0	0	0	2	3		0	1	0	1	1	0	2
398	4.50103	2		3		-1.21	-0.45	0.38	10	0	Primary 7	0	0					0			1							2
399	5.21013	1	3	2	SMA	-1.7	-2.41	-1.92	16	1	Secondary or higher	0	0	0	1	1	0	0	0	0		0	1	1	1	1	1	2
400	3.49897	1		3		0.97	0.01	-0.6	8	1	Primary 7	0	0					0			0							2
401	3.92882	1		3		-0.57	-0.56	-0.18	9	0	Primary 6 or lower	0	0					0			0							2
402	2.6694	1	2	2	SMA	0.11	-2.08	-2.44	12	0	Secondary or higher	0	0	0	1	1	0	0	0	0		0	1	0	1	1	0	2
403	1.86721	1	4	2	SMA	-0.91	-0.72	-0.25	15		Secondary or higher	0	0	0	0	1	0	0	0	0		0	1	1	1	1	0	2
404	2.75975	1	1	1	CM	-2.01	0.58	1.98	9	0	Secondary or higher	0	0	1	0	0	0	0	2	0		0	1	0	0	0	0	2
405	1.78234	1	3	1	CM	-0.7	-1.5	-1.5			Not known	0	0	1	1	1	0	0	3	2		1	1	0	1	1	1	2
406	2.11088	2	2	1	CM	0.73	-0.8	-1.25	14	0	Primary 7	0	0	1	1	0	0	0	2	0		0	1	1	1	1	0	2
407	3.32101	2	3	2	SMA	-2.56	-0.35	1.42	8	0	Secondary or higher	0	0	0	1	1	0	0	0	0		0	1	0	1	1	0	2
408	1.69747	1	3	1	CM	0.91	0.14	-0.36	6	0	Secondary or higher	0	0	1	1	1	0	0	2	0		1	1	0	1	1	0	2
409	2.55715	1	4	2	SMA	-0.98	-2.54	-2.3	15	1	Primary 6 or lower	0	0	0	1	1	0	0	0	0		0	1	1	1	1	0	2
410	4.79124	2		3		-1.23	-1.23	-0.59	10	1	Secondary or higher	0	0					0			1							2
411	5.83984	2		3		-0.47	-0.18	0.06	17	1	Secondary or higher	0	0					0			0							2
412	4.38877	1		3		-1.63	-0.49	0.75	8	1	Secondary or higher	0	0					0			1							2
413	8.00274	1		3		-0.24	0.58	1.12	7	1	Secondary or higher	0	0					0			0							2
414	5.87269	1		3		-0.61	0.03	0.56	8	0	Not known	0	0					0			0							2
416	3.40315	1	4	1	CM	-0.72	-1.67	-1.55	8	1	Secondary or higher	0	0	1	1	0	0	0	2	1		0	1	0	1	1	0	2
417	4.32307	2	4	1	CM	-0.83	-1.94	-1.75	13	1	Secondary or higher	0	0	1	1	1	0	0	2	0		0	1	1	1	1	0	2
418	6.00137	2	4	2	SMA	-0.48	-0.19	0.06	9	1	Primary 7	1	0	0	0	1	0	0	0	0		1	0	0	1	1	0	2
419	3.28542	1	4	2	SMA	-0.89	-0.68	-0.08	8	0	Primary 7	0	0	0	0	1	0	0	0	0		0	1	0	1	1	0	2
420	4.83504	1	4	2	SMA	-0.46	-0.61	-0.38	9	0	Primary 6 or lower	0	0	0	1	1	0	0	1	0		1	1	0	1	1	0	2
421	3.44969	1	3	1	CM	0.44	-0.27	-0.54	16	1	Secondary or higher	0	0	1	0	0	0	0	2	0		0	1	1	1	0	0	2
422	3.56194	2	4	2	SMA	1.55	-0.68	-1.69	6	1	Primary 6 or lower	0	0	0	1	1	0	0	0	0		0	1	0	1	1	0	2
423	5.1499	1	2	2	SMA	-0.57	0.45	1.15	17	1	Primary 7	1	0	0	1	1	0	0	0	0		0	1	0	1	1	0	2
424	4.61054	2		3		0.56	0.34	0.12	10	1	Primary 6 or lower	0	0					0			0							2
425	3.55647	1		3		0.16	-0.39	-0.51	8	0	Primary 6 or lower	0	0					0			0							2
426	4.34223	2	7	1	CM	-0.57	-0.79	-0.46	9	1	Primary 7	0	0	1	0	0	0	0	2	1		0	1	0	1	1	1	2
427	3.26899	1	5	1	CM	0.3	-0.66	-0.92	7	1	Primary 6 or lower	0	0	1	1	0	0	0	2	0		0	1	0	0	0	0	2
428	1.60712	2	2	2	SMA	-0.1	0.97	1.37	7	0	Secondary or higher	0	0	0	1	1	0	0	1	0		0	1	0	1	1	0	2
429	3.83299	1		3		-2.79	-1.7	-0.05	9	1	Secondary or higher	0	0					0			0							2
430	2.85832	2	7	2	SMA	-0.54	-1.86	-1.7	8	0	Primary 6 or lower	0	0	0	1	1	0	0	0	0		0	1	1	1	1	0	2
431	2.78987	1	3	1	CM	-0.15	-0.96	-0.94	10	0	Primary 6 or lower	0	0	1	1	1	0	0	2	3		1	1	0	0	0	1	2
432	2.08898	2	2	1	CM	-0.28	-1.35	-1.25	9	0	Secondary or higher	0	0	1	1	0	1	0	2	0		1	1	0	1	1	0	2
433	3.56468	2	3	1	CM	0.8	0.43	0.22	9	1	Primary 6 or lower	0	0	1	0	0	0	0	2	1		0	1	0	0	0	0	2
434	1.74949	1	4	2	SMA	0.48	0.08	-0.15	9	0	Secondary or higher	0	0	0	1	1	0	0	1	0		0	1	1	1	1	1	2
435	3.27447	1	2	1	CM	-1.09	0.02	0.86	9	0	Secondary or higher	0	0	1	1	0	0	0	2	5		0	1	0	1	1	1	2
436	2.62012	1	4	1	CM	-1.29	-2.59	-2.22			Not known	0	0	1	1	1	0	0	2	0		0	1	0	1	1	0	2
437	4.39151	1	3	1	CM	0.64	-1.21	-1.99	8	1	Primary 6 or lower	0	0	1	0	0	0	0	2	0		0	1	1	0	0	0	2
438	3.3922	1	4	2	SMA	-0.23	0.33	0.7	9	0	Primary 6 or lower	0	0	0	1	1	0	0	1	0		0	1	0	1	1	0	2
439	3.04175	1	2	1	CM	-0.51	-1.64	-1.61	8	0	Primary 6 or lower	0	0	1	1	0	1	0	2	0		0	1	0	0	0	0	2
440	2.91855	2	3	2	SMA	-3.39	-2.61	-0.76	9	0	Primary 7	0	0	0	1	1	0	0	0	0		0	1	1	1	1	0	2
441	4.00821	1		3		-1.6	2.09	4.21	7	0	Not known	0	0					0			0							2
442	3.5154	1	5	1	CM	-0.21	1.77	2.53	14	0	Primary 7	0	0	1	1	1	0	0	2	0		0	1	1	1	1	0	2
443	2.29979	1	7	2	SMA	0.59	1.21	1.19	8	0	Secondary or higher	0	0	0	1	1	0	0	1	0		0	1	1	1	1	0	2
444	3.93703	1	1	1	CM	-1.24	-1.66	-1.2	7	0	Secondary or higher	0	0	1	0	0	0	0	2	0		0	1	0	0	0	0	2
445	3.16496	2	3	2	SMA	-2.93	-2.32	-0.7	13	0	Primary 7	0	0	0	1	1	0	0	0	0		0	1	1	1	1	0	2
446	3.03354	1	3	2	SMA	-2.07	-1.64	-0.51	8	0	Primary 6 or lower	0	0	0	1	1	0	0	0	0		0	1	1	1	1	0	2
447	7.12115	2	3	1	CM	-0.52	-0.71	-0.57	16	1	Secondary or higher	0	0	1	1	0	0	0	2	1		0	1	0	1	0	1	2
448	2.43669	1	5	2	SMA	-1.59	-0.96	0.07	9	0	Secondary or higher	0	0	0	1	1	0	0	0	0		0	1	1	1	1	0	2
449	2.60096	2	3	2	SMA	-2.41	-2.33	-1.05	9	0	Primary 6 or lower	0	0	0	1	1	0	0	0	0		0	1	0	1	1	0	2
450	3.83025	1	3	1	CM	-0.32	-0.69	-0.54	10	0	Primary 6 or lower	0	0	1	0	0	0	0	2	1		0	0	0	0	0	0	2
451	5.57974	2	7	1	CM	-1.03	-1.26	-0.87	7	1	Secondary or higher	0	0	1	1	1	0	0	2	0		1	1	0	1	1	0	2
452	1.87269	1	7	2	SMA	-2.69	-1.74	-0.38	8	0	Primary 6 or lower	0	0	0	1	1	0	0	0	0		0	1	0	1	1	0	2
453	1.84805	1	3	2	SMA	-0.49	-0.89	-0.8	8	0	Primary 6 or lower	0	0	0	1	1	0	0	0	0		1	1	0	1	1	0	2
454	3.77823	1	3	1	CM	-0.46	-2.27	-2.58	9	0	Secondary or higher	0	0	1	1	1	0	0	2	2		0	1	0	1	1	0	2
456	3.93155	2		3		0.46	-0.2	-0.47	7	1	Primary 6 or lower	0	0					0			0							2
457	4.36687	2		3		1.3	-0.05	-1.01	8	1	Primary 6 or lower	0	0					0			0							2
458	8.54483	2	3	1	CM	1.57	0.58		14	1	Secondary or higher	0	0	1	0	0	0	0	2	0		0	1	0	0	0	0	2
459	2.08898	2		3		-2.08	-0.97	0.26	15	1	Primary 6 or lower	0	0					0			0							2
461	4.19986	2		3		0.24	-0.75	-1	8	0	Primary 7	0	0					0			1							2
462	2.56263	1	2	1	CM	1.46	-0.87	-1.8	8	0	Primary 6 or lower	0	0	1	1	0	0	0	2	1		0	1	0	0	0	0	2
463	4.63244	2		3		-2.24	-1.49	-0.12	11	1	Primary 7	0	0					0			0							2
465	2.58179	1		3		0.51	0.06	-0.14	7	0	Not known	0	0					0			1							2
467	2.06708	2	3	2	SMA	-0.69	0.11	0.52	8	0	Secondary or higher	0	0	0	1	1	0	0	1	0		1	1	1	1	1	0	2
468	3.52088	2	7	2	SMA	-1.22	-1.28	-0.52	7	0	Primary 6 or lower	0	0	0	1	1	0	0	0	0		0	1	0	1	1	1	2
469	2.15195	1	3	1	CM	0.49	-0.51	-0.76	9	1	Primary 6 or lower	0	0	1	0	0	0	0	2	1		0	1	0	1	1	0	2
470	4.5065	2	4	1	CM	0.9	-0.36	-1.08	12	1	Secondary or higher	0	0	1	0	0	0	0	2	0		1	1	1	1	0	1	2
471	3.17864	2	3	1	CM	-1.27	-2.61	-2.22	7	0	Primary 6 or lower	0	0	1	0	0	0	0	2	0		0	1	0	0	0	0	2
472	7.03901	1	1	1	CM	0.87	-0.31	-1.37	8	1	Secondary or higher	0	0	1	1	0	0	0	2	0		0	1	0	0	0	0	2
473	3.47707	1	3	2	SMA	0.92	0.28	-0.2	6	0	Primary 7	0	0	0	1	1	0	0	0	0		0	1	1	1	1	0	2
474	1.7796	1		3		-2.14	-1.66	-0.71	9	0	Primary 6 or lower	0	0					0			0							2
475	4.97467	2		3		-2.66	-1.72	-0.14	11	1	Secondary or higher	0	0					0			1							2
476	2.31075	1		3		-1.66	-0.37	0.64	8	0	Primary 7	0	0					0			0							2
477	7.66872	1	5	2	SMA	0.8	-0.46	-1.54	10	1	Secondary or higher	1	0	0	1	1	0	0	1	0		0	1	1	1	1	0	2
478	2.68857	1	4	1	CM	-0.34	-0.57	-0.32	10	0	Primary 6 or lower	0	0	1	1	0	0	0	2	2		0	1	0	0	0	0	2
479	8.14237	2		3		-0.69	-1.48	-1.57	10	1	Primary 6 or lower	0	0					0			1							2
480	3.96167	2	5	1	CM	-0.86	1.38	2.69	15	1	Primary 7	0	0	1	1	1	0	0	2	0		0	1	0	1	1	1	2
481	5.08693	2	1	2	SMA	-2.62	-1.97	-0.54	8	1	Secondary or higher	0	0	0	1	1	0	0	0	0		1	1	0	1	1	0	3
482	3.81656	2	3	1	CM	-3.02	-0.46	1.65	8		Secondary or higher	0	0	1	1	1	0	0	2	1		1	1	0	1	1	0	2
483	9.74675	2		3		-2.72	-1.79	0.52	11	1	Primary 6 or lower	0	0					0			0							2
484	2.18207	1		3		-0.72	-0.88	-0.39	14	0	Secondary or higher	0	0					0			0							3
485	5.86721	2		3		-1.31	-1.98	-1.67	12	1	Secondary or higher	0	0					0			1							2
486	1.88638	1	2	2	SMA	0.99	-0.82	-1.7	9	0	Secondary or higher	1	0	0	1	1	0	0	1	0		0	1		1	1	0	3
487	4.22998	1	3	1	CM	-0.25	-1.55	-1.78	14	1	Secondary or higher	0	0	1	1	0	0	0	2	1		0	1	0	1	1	0	3
488	6.03696	2	14	1	CM	-0.94	0.14	0.9	14	1	Secondary or higher	0	0	1	1	1	0	0	2	0		0	1	1	1	1	0	3
489	3.02533	1	2	1	CM	2.28	-1.59	-3.17	7	0	Primary 6 or lower	0	0	1	1	1	0	0	2	0		0	1	0	1	1	0	3
490	3.12115	2	2	1	CM	-0.42	-0.85	-0.52	12	0	Primary 6 or lower	0	0	1	1	0	0	0	2	0		0	1	1	1	1	0	3
491	2.63381	1	2	1	CM	-0.95	-1.87	-1.52	9	0	Primary 6 or lower	0	0	1	1	0	0	0	2	0		1	1	1	1	1	0	3
492	2.99795	1	3	1	CM	-3.28	-2.2	-0.41	7	1	Primary 6 or lower	0	0	1	1	0	0	0	2	1		1	1	0	1	1	1	3
493	1.87817	1	2	2	SMA	-2.06	-3.3	-3.25	8	0	Primary 6 or lower	0	0	0	1	1	1	0	1	0		0	1	1	1	1	0	3
494	3.00068	2		3		-1.4	-0.68	0.33	7	0	Primary 7	0	0					0			1							2
495	3.35113	1	2	1	CM	-3.11	-2.51	-1.07	13	0	Primary 6 or lower	0	0	1	0	0	0	0	2	0		1	1	0	1	0	0	3
496	2.81999	1	3	2	SMA	-0.7	-0.11	0.42	7	0	Secondary or higher	0	0	0	1	1	0	0	0	0		0	1	0	1	1	1	2
497	4.43532	2		3		-0.03	-0.39	-0.41	11	1	Secondary or higher	0	0					0			0							2
499	5.42642	2		3		-0.89	-1.03	-0.67	10	1	Secondary or higher	0	0					0			0							2
500	4.59411	1		3		-2.06	-1.86	-0.85	16	1	Secondary or higher	0	0					0			0							3
501	2.58179	1	2	1	CM	-0.98	-1.17	-0.6	9	0	Secondary or higher	0	0	1	1	0	0	0	2	1		0	1	1	1	1	1	2
502	3.42505	1	2	1	CM	-2.4	-2.91	-2.2	6	0	Primary 7	0	0	1	0	0	0	0	2	0		0	1	0	0	0	0	2
503	2.85832	2		3		-1.56	-1.26	-0.24	8	0	Secondary or higher	0	0					0			1							2
504	4.03559	2	5	1	CM	-1.39	-2.33	-1.86	6	0	Secondary or higher	0	0	1	1	0	0	0	2	0		0	1	0	1	1	0	3
506	2.7707	2	4	1	CM	0.2	-0.84	-0.93	9	0	Secondary or higher	0	0	1	1	1	0	0	2	3		1	1	0	1	1	1	2
507	3.98631	2	4	1	CM	0.12	-1.66	-1.97	14	1	Primary 6 or lower	0	0	1	0	0	0	0	2	2		0	1	0	0	0	0	3
508	2.26146	1		3		-1.48	-0.76	0.2	7	0	Primary 7	0	0					0			0							3
509	3.72348	1	7	2	SMA	0.58	-0.26	-0.67	20	1	Primary 6 or lower	0	0	0	1	1	0	0	0	0		0	0	0	1	1	0	2
510	5.70568	1	3	2	SMA	0.18	-0.89	-1.36	8	1	Primary 6 or lower	1	0	0	1	1	0	0	0	0		0	1	1	1	1	0	2
511	6.05339	2	5	1	CM	-1.32	-2.68	-2.69	8	1	Primary 6 or lower	0	0	1	1	1	0	0	2	0		0	1	0	1	1	0	3
513	4.39151	2		3		-0.56	0.15	0.64	14	1	Secondary or higher	0	0					0			0							2
514	2.21218	2	3	2	SMA	0.01	-2.78	-3.03	7	0	Secondary or higher	0	0	0	1	1	0	0	0	0		0	1	0	1	1	0	3
515	4.87611	2	3	2	SMA	-0.22	-2.04	-2.38	7	0	Primary 7	0	0	0	1	1	0	0	1	0		0	1	0	1	1	0	2
516	2.423	1		3		-1.07	-0.99	-0.31	9	0	Primary 7	0	0					0			0							3
517	5.51951	1	5	2	SMA	-0.44	-0.75	-0.6	5	1	Primary 7	0	0	0	1	1		0	0	0		0	1	1	1	1	0	3
518	2.96783	1	3	1	CM	0.76	-0.43	-0.93	19	0	Secondary or higher	0	0	1	1	0	0	0	2	0		0	1	1	1	1	1	2
519	5.02669	2	4	2	SMA	0.37	-0.86	-1.4	9	1	Primary 7	1	0	0	1	1	0	0	0	0		0	1	0	1	1	0	3
520	2.17659	2	2	1	CM	1.7	-1.71	-2.76	14	0	Primary 7	0	0	1	0	0	0	0	2	5		1	1	0	1	1	0	3
521	3.7755	1	7	2	SMA	-0.59	-1.73	-1.76	7	0	Primary 6 or lower	1	0	0	1	1	0	0	0	0		0	1		1	1	0	3
522	3.19507	2	3	1	CM	1.16	0.36	-0.08	9	0	Primary 7	0	0	1	0	0	0	0	2	1		0	1	0	0	0	0	3
523	2.07255	1	5	2	SMA	-1.29	-2.13	-1.36	7	0	Primary 6 or lower	0	0	0	0	1	0	0	0	0		0	1	1	1	1	0	3
524	2.43395	2	3	1	CM	-1.72	-1.82	-0.87	12	0	Primary 7	0	0	1	1	0	0	0	2	1		0	1	1	1	1	0	2
525	7.27447	1	3	1	CM	0.82	0.15	-0.65	10	1	Primary 7	0	0	1	0	0	0	0	2	10		0	1	1	0	0	1	2
526	10.0726	1		3		-2.8	-2.14	-0.47	9	1	Primary 7	0	0					0			1							2
527	5.11704	2	3	2	SMA	-4.02	-1.95	0.58	7	0	Primary 6 or lower	0	0	0	1	1	0	0	1	0		0	1		1	1	0	3
528	6.46133	2	3	1	CM	-1.26	-0.15	0.81	11	1	Primary 6 or lower	0	0	1	0	0	0	0	2	0		0	1	0	0	0	0	2
529	7.10472	2	2	1	CM	-1.07	-2.08	-2.16	9	1	Primary 7	0	0	1	1	0	0	0	2	0		0	1	1	1	1	1	2
531	2.57084	2		3		-1.65	-1.24	-0.17	9	0	Primary 7	0	0					0			1							3
532	1.97947	2	5	2	SMA	-1.51	-0.89	-0.11	10	0	Secondary or higher	0	0	0	1	1	0	0	1	0		0	1	0	1	1	0	2
533	3.01711	2	2	1	CM	-1.02	-0.73	0.05	8	0	Primary 7	0	0	1	1	0	0	0	2	1		0	1	0	1	1	1	3
534	1.88364	2	4	2	SMA	-1.98	-2.94	-2.65	16		Primary 7	0	0	0	1	1	0	0	1	0		0	1	0	1	1	0	2
535	5.6564	2	3	1	CM	-1.28	-0.33	0.53	9	1	Secondary or higher	0	0	1	0	0	0	0	2	2		0	1		0	0	0	3
536	8.99932	1		3		-0.96	0.11	1.18	14	1	Secondary or higher	0	0					0			1							2
537	6.48597	1	3	1	CM	-1.33	-1.8	-1.28	11	1	Secondary or higher	0	0	1	1	0	0	0	2	3		0	1	0	1	1	1	2
538	3.28542	1	3	1	CM	0.17	-1.25	-1.59	3	0	Primary 6 or lower	0	0	1	1	0	0	0	2	21		1	1	1	1	1	1	2
539	6.09446	2	4	2	SMA	-1.6	-2.03	-1.52	8	1	Primary 6 or lower	0	0	0	1	1	0	0	1	0		0	1	0	1	1	0	2
540	7.00068	2		3		1.54	1.55	0.53	8	1	Primary 7	0	0					0			1							2
541	3.09651	2	2	1	CM	1.88	-0.62	-1.75	11	0	Primary 6 or lower	0	0	1	1	0	0	0	2	1		0	1	0	1	1	0	3
542	2.72964	1	4	1	CM	1.04	-1.99	-2.88	8	0	Secondary or higher	0	0	1	1	0	0	0	2	1		0	1	1	0	0	1	2
543	1.97125	1	3	1	CM	3.3	0.54	-1.65	8	0	Secondary or higher	0	0	1	1	0	0	0	2	0		0	1	1	1	1	1	2
544	3.66598	1	4	1	CM	0.5	-1.62	-2.32	14	0	Secondary or higher	0	0	1	1	1	0	0	2	0		0	1	0	1	1	0	3
545	6.43395	2		3		-0.05	-0.55	-0.87	11	1	Secondary or higher	0	0					0			0							2
546	3.91513	1		3		-0.83	-0.81	-0.32	9	0	Primary 6 or lower	0	0					0			1							3
548	2.80356	1		3		-0.51	-0.79	-0.48	10	0	Secondary or higher	0	0					0			1							3
549	3.50445	1	4	2	SMA	1.42	-0.3	-1.3	7	0	Primary 6 or lower	0	0	0	1	1	0	0	1	0		1	1	0	1	1	0	3
550	3.32923	2	4	1	CM	-0.43	-1.65	-1.53	6	0	Primary 6 or lower	0	0	1	1	1	0	0	2	0		1	1	0	1	1	1	3
552	2.423	1		3		-0.9	-0.99	-0.43			Not known	0	0					0			0							3
553	2.07529	1		3		-2.58	-2.16	-0.56	16	0	Primary 7	0	0					0			0							3
554	2.67214	1	5	2	SMA	-0.96	-0.08	0.58	13	0	Secondary or higher	0	0	0	1	1	0	0	1	0		0	1	0	1	1	0	2
555	3.00616	1	4	1	CM	-2.8	-0.98	0.76	17	0	Secondary or higher	0	0	1	0	0	0	0	2	1		0	1	1	1	1	0	3
556	4.61875	2		3		-0.21	-0.44	-0.37	11	1	Primary 6 or lower	0	0					0			0							2
557	1.57426	2	3	2	SMA	-0.07	-0.75	-0.9	9	0	Secondary or higher	0	0	0	1	1	0	0	0	0		0	1	0	1	1	1	2
558	3.7755	2		3		-1.39	0.19	1.32	11	1	Primary 6 or lower	0	0					0			0							3
559	3.4935	2		3		-1.13	-1.04	-0.28	7	0	Primary 7	0	0					0			0							2
560	5.00753	1	3	2	SMA	0.04	-1.01	-1.34	11	0	Primary 6 or lower	0	0	0	1	1	0	0	1	0		0	1	1	1	1	0	3
561	5.71389	2		3		-0.46	-0.49	-0.35	9	1	Primary 6 or lower	0	0					0			0							2
562	4.25736	2	2	2	SMA	-1.74	-2.65	-2.1	10	1	Primary 7	0	0	0	1	1	0	0	0	0		1	1	1	1	1	0	3
563	1.61259	1	2	2	SMA	-1.36	-3.02	-3.19	12	0	Secondary or higher	0	0	0	1	1	0	0	1	0		0	1	1	1	1	1	2
564	3.14031	2	4	1	CM	-0.21	0.34	0.75	16	1	Secondary or higher	0	0	1	1	0	0	0	2	0		0	1	0	0	0	0	3
566	3.53457	2	2	1	CM	-1.46	-0.64	0.41	9	0	Primary 6 or lower	1	0	1	1	0	0	0	2	0		0	1	0	1	1	1	2
567	7.01711	1	3	1	CM	-2.22	-2.56	-1.66	13	0	Primary 7	0	0	1	1	0	0	0	2	0		1	1	0	1	1	0	3
568	2.08624	1		3		-0.75	0.27	0.76	9	0	Primary 7	0	0					0			0							3
569	4.11499	1	4	1	CM	-1.96	-1.47	-0.37	9	0	Primary 6 or lower	0	0	1	1	0	0	0	2	1		0	1	1	1	0	1	2
570	1.87269	2	2	1	CM	-3.29	-2.91	-1.61	8	0	Primary 6 or lower	0	0	1	0	0	0	0	2	8		1	1	0	1	1	0	2
571	2.23135	2		3		0.04	-1.5	-1.62	11	0	Primary 7	0	0					0			0							3
572	6.5024	2	4	1	CM	-0.22	-0.61	-0.76	11	1	Primary 6 or lower	0	0	1	1	0	0	0	2	0		0	1	0	0	0	0	2
573	2.7269	1	5	2	SMA	-1.64	-2.39	-1.77	15	0	Primary 6 or lower	0	0	0	1	1	0	0	0	0		0	1	0	1	1	0	2
574	6.65298	2	2	2	SMA	-0.24	-2.04	-2.79	10	1	Primary 6 or lower	0	0	0	1	1	0	0	1	0		1	1	1	1	1	1	3
575	2.0616	1	3	2	SMA	2.19	-1.19	-3.04	12	0	Primary 6 or lower	0	0	0	1	1	0	0	1	0		0	1	1	1	1	0	3
577	3.50171	1	5	1	CM	0.18	-1.48	-1.92	13	0	Primary 6 or lower	0	0	1	0	0	0	0	2	0		0	1	1	1	1	0	3
578	4.6078	1		3		-2.46	-0.93	0.82	9	1	Secondary or higher	0	0					0			0							2
580	2.69678	1	4	1	CM	-2.52	-2.63	-1.48	6	0	Not known	0	0	1	0	0	0	0	2	0		1	1	0	1	1	0	3
581	2.57906	1	2	2	SMA	0.72	-2.54	-3.25	7	0	Secondary or higher	0	0	0	1	1	0	0	0	0		1	1	1	1	1	0	3
582	2.1191	2	1	1	CM	-1.9	-1.64	-0.56	13	0	Primary 6 or lower	0	0	1	1	0		0	2	0		0	1	1	1	1	0	3
583	4.62149	1	1	2	SMA	-0.93	0.11	0.98	8	0	Primary 6 or lower	0	0	0	1	1	0	0	0	0		0	1	0	1	1	1	3
584	3.68241	1		3		-2.45	-0.85	0.78	12	0	Secondary or higher	0	0					0			0							2
585	5.40452	1		3		-2.15	-1.67	-0.42	7	1	Secondary or higher	0	0					0			1							2
586	3.46064	2		3		0.09	-1.39	-1.57	14	1	Primary 7	0	0					0			0							2
587	4.07392	1	3	1	CM	-3.6	-0.89	1.57	7	0	Primary 6 or lower	0	0	1	1	0	0	0	2	2		1	1		1	1	1	3
588	1.64819	2	1	1	CM	0	-0.86	-1.11	8	0	Primary 6 or lower	0	0	1	0	0	0	0	2	2		1	1	1	1	1	1	3
589	4.1013	2		3		1.14	-0.19	-1	8	1	Primary 6 or lower	0	0					0			0							3
590	1.60986	2	3	2	SMA	-1.13	-0.79	-0.25	9	0	Secondary or higher	0	0	0	1	1	0	0	0	0		0	1	0	1	1	0	3
591	4.52019	1	3	2	SMA	0.43	0.15	-0.1	12	1	Secondary or higher	0	0	0	1	1	0	0	0	0		0	1	1	1	1	0	3
592	11.4415	2		3		-1.29	-1.66		12	1	Secondary or higher	0	0					0			1							2
593	10.7953	1	2	2	SMA	-1.73	-1.59	-0.54	14	1	Primary 7	0	0	0	0	1	0	0	0	0		0	0	0	1	1	0	3
594	10.8364	1		3		0.56	-0.17		6	1	Secondary or higher	0	0					0			0							2
595	4.25188	1	3	1	CM	-0.97	-1.05	-0.54	13	1	Secondary or higher	0	0	1	1	0	0	0	2	0		0	1	0	0	0	0	3
596	7.09103	1	2	2	SMA	-1.61	-0.67	0.66	7	1	Secondary or higher	0	0	0	1	1	0	0	1	0		0	1	1	1	1	0	2
597	7.44969	1		3		-1.56	-1.18	-0.05	7	1	Secondary or higher	0	0					0			1							2
598	5.91376	1		3		-1.36	-1.13	-0.28	8	1	Secondary or higher	0	0					0			1							2
599	7.21424	2	2	1	CM	-2.06	0.63	3.45	7	1	Secondary or higher	0	0	1	1	0	0	0	2	1		0	1	0	1	0	0	2
600	5.06229	1	2	2	SMA	0.42	-1.75	-2.61	7	1	Primary 7	0	1	0	1	1	0	0	0	0		0	1	0	1	1	0	2
661	3.59206	2	1	1	CM	2.29	-0.1	-1.55	14	1	Secondary or higher	0	0	1	0	0	0	0	2	0		0	1	0	0	0	0	4
662	2.28063	2		3		-1.35	-1.97	-1.3	15	0	Primary 6 or lower	0	0					0			0							3
663	3.1102	1		3		-2.29	-1.14	0.29	15	0	Secondary or higher	0	0					0			0							3
664	6.09446	1	2	2	SMA	-0.8	-1.19	-0.89	9	1	Primary 6 or lower	0	0	0	1	1	0	0	0	0		0	1	0	1	1	1	4
665	2.2204	1	4	1	CM	-0.08	-0.61	-0.51	8	0	Secondary or higher	0	0	1	0	0	0	0	2	0		0	1	0	1	1	0	4
666	2.17112	1	2	2	SMA	-2.33	-2.22	-0.84	6	0	Secondary or higher	0		0	1	1	1	0	1	0		0	1	0	1	1	0	3
668	2.43669	1	12	2	SMA	-2.94	-3.21	-1.83	9	0	Primary 6 or lower	0	0	0	1	1	0	0	0	0		0	1	0	1	1	0	4
669	4.26557	1	4	2	SMA	-2.62	-0.58	1.35	6	0	Secondary or higher	0	0	0	1	1	0	0	1	0		1	1	0	1	1	1	4
670	7.35661	1	3	1	CM	-3.16	-1.3	1.36	10	1	Primary 7	0	0	1	0	0	0	0	2	0		0	1	0	1	1	0	4
671	3.02259	1		3		-0.5	-1.04	-0.83	7	0	Not known	0	0					0			0							3
672	2.32444	1	5	2	SMA	-2.02	-3.14	-2.26	8	0	Primary 6 or lower	0	0	0	0	1	0	0	0	0		0	1		1	1	0	3
673	7.52909	1	4	1	CM	-2.29	-2.46	-1.45	8	1	Secondary or higher	0	0	1	0	0	0	0	2	0		0	1	0	1	1	0	4
674	2.35729	1	7	2	SMA	-3.44	-2.38	-0.35	11	0	Secondary or higher	0	1	0	0	1	0	0	0	0		0	1	0	1	1	1	4
675	3.69884	1	3	1	CM	-1.74	-2.76	-2.45	7	0	Primary 6 or lower	0	0	1	0	0	0	0	2	0		0	1		1	1	0	4
676	5.32786	1	4	2	SMA	-1.97	-1.5	-0.32	6	1	Primary 6 or lower	0	0	0	0	1	0	0	0	0		0	1	0	1	1	0	4
677	2.11362	1	3	2	SMA	-1.61	-3.87	-3.14	20	0	Primary 6 or lower	0	0	0	0	1	0	0	0	0		0	1	0	1	1	1	3
679	3.6742	1	3	2	SMA	-0.36	-1.09	-1.05	9	0	Secondary or higher	0	0	0	1	1	1	0	0	0		0	1		1	1	1	3
680	2.77618	2		3		-1.1	-1.16	-0.44	17	0	Secondary or higher	0	0					0			0							3
681	2.05886	2		3		-0.4	0.03	0.31	11	0	Primary 7	0	0					0			0							3
682	5.47844	1	3	1	CM	-0.75	0.17	0.91	8	1	Primary 6 or lower	0	0	1	0	0	0	0	2	0		0	1	0	0	0	0	4
684	6.73238	1	1	1	CM	2.39	1.41	-0.36	14	1	Primary 6 or lower	0	0	1	0	0	0	0	2	0		0	1	0	0	0	0	3
685	2.15469	1	3	2	SMA	-3.1	-2.19	-0.24	9	0	Secondary or higher	0	0	0	1	1	0	0	1	0		0	1	0	1	1	1	4
686	2.40383	1	0	2	SMA	-2.76	-2.41	-0.88	9	0	Primary 6 or lower	0	0	0	1	1	0	0	0	0		1	1		1	1	0	4
687	2.9295	2		3		-0.9	-0.66	0.05	12	0	Primary 7	0	0					0			0							3
688	2.63381	2		3		-0.98	-1.69	-1.19	9	0	Primary 6 or lower	0	0					0			1							3
689	4.08761	2	1	2	SMA	-2.55	-2.37	-1.13	6	1	Primary 6 or lower	0	0	0	1	1	0	0	1	0		1	1	1	1	1	1	4
690	2.40657	1	7	2	SMA	-1.16	-1.69	-1.09	9	0	Secondary or higher	0	0	0	1	1	0	0	0	0		0	0	0	1	1	0	3
691	8.08487	1	5	1	CM	-1.3	-1.39	-0.65	15	1	Primary 6 or lower	0	0	1	0	0	0	0	2	0		0	0	0	0	0	0	4
692	5.70021	1	2	1	CM	-0.86	0	0.75	15	1	Secondary or higher	0	0	1	0	0	0	0	2	0		0	1		0	0	0	4
694	2.22313	1		3		0.96	-0.7	-1.26	6	0	Not known	0	0					0			1							4
695	3.80561	2	3	2	SMA	-0.47	-1.85	-1.81	9	1	Secondary or higher	0	0	0	1	1	0	0	0	0		0	1	1	1	1	0	4
696	1.77413	2	4	2	SMA	-1.35	-1.95	-1.7	10	0	Secondary or higher	0	0	0	0	1	0	0	1	1		0	1	1	1	1	0	4
698	4.25462	2		3		-1.43	-0.8	0.17	10	0	Secondary or higher	0	0					0			1							4
699	2.39014	2		3		-0.99	-1.36	-0.78	12	0	Secondary or higher	0	0					0			0							4
700	1.87543	1		3		-1.21	-0.25	0.59	12	0	Secondary or higher	0	0					0			0							3
701	4.52293	1	7	2	SMA	-1.47	-2.03	-1.56	6	0	Primary 6 or lower	0	0	0	1	1	0	0	0	0		0	1	1	1	1	1	3
702	5.92197	1	1	1	CM	-1.95	-2.8	-2.27	9	1	Secondary or higher	0	0	1	0	0	0	0	2	0		0	1	0	0	0	1	4
703	2.14374	1		3		0.64	-1.38	-1.77	14	0	Secondary or higher	0	0					0			0							3
704	4.34771	1	4	1	CM	-1.3	-0.66	0.25	7	0	Primary 7	0	1	1	1	1	0	0	3	0		1	1	1	1	1	1	4
705	6.0616	1	3	1	CM	-1.79	-0.3	1.28	14	1	Secondary or higher	0	0	1	0	0	0	0	2	1		0	1	0	0	0	0	4
706	2.69952	1	7	2	SMA	-1.04	0.06	0.79	9	0	Primary 6 or lower	0	0	0	0	1	0	0	0	0		0	0	0	1	1	0	4
707	1.88638	2		3		-3.18	-2.18	-0.7	7	0	Primary 6 or lower	0	0					0			0							4
708	3.02806	2		3		-0.31	-0.45	-0.1	14	0	Secondary or higher	0	0					0			0							3
709	3.7755	2		3		-2.27	-2.77	-1.87	7	0	Primary 6 or lower	0	0					0			1							4
710	3.58111	1		3		-1.16	-1.03	-0.37	9	0	Primary 7	0	0					0			0							4
711	11.4552	1	3	1	CM	-0.19	-0.68	-0.88	14	1	Primary 6 or lower	0	0	1	0	0	0	0	2	0		1	0	0	0	0	1	4
712	1.59617	2	3	1	CM	-3.09	-1.22	0.77	5	0	Primary 7	0	0	1	0	0	0	0	2	1		1	1	1	1	1	0	4
713	2.15195	1		3		-0.94	-0.58	0.07	17	0	Secondary or higher	0	0					0			0							4
714	1.96851	1	4	2	SMA	-4.88	-1.86	1.49	9	0	Primary 6 or lower	0	0	0	1	1	0	0	0	0		0	1	1	1	1	1	3
715	3.76728	1	1	2	SMA	-2.61	-1.74	-0.26	9	0	Primary 7	0	0	0	1	1	0	0	0	0		1	1	1	1	1	1	3
717	2.65845	1	2	2	SMA	-0.06	-0.56	-0.5	11	0	Secondary or higher	0	0	0	0	1	0	0	1	0		1	1	1	1	1	0	4
718	7.01985	1	3	1	CM	-2.36	-1.06	0.85	9	0	Primary 6 or lower	0	0	1	0	0	0	0	2	0		1	1	0	1	1	0	4
719	4.61875	1		3		-1.65	-1.43	-0.54	9	1	Primary 6 or lower	0	0					0			0							4
720	3.72074	2		3		-2.17	-2.73	-1.87	13	0	Primary 7	0	0					0			0							4
721	2.45585	2	7	1	CM	-3.01	-2.16	-0.42	5	0	Primary 7	0	0	1	0	0	0	0	2	0		0	1	1	0	0	0	4
722	11.7372	1	2	1	CM	-0.49	-0.05		17	1	Primary 6 or lower	0	0	1	0	0	0	0	2	1		0	1	0	0	0	0	3
723	2.03696	2		3		-1.66	-1.05	-0.22	9	0	Primary 6 or lower	0	0					0			0							3
724	2.72142	1		3		-1.77	0.56	1.82	7	0	Primary 6 or lower	0	0					0			0							4
725	2.66667	1		3		-0.82	0.63	1.35	12	0	Primary 7	0	0					0			0							4
726	4.10951	1	3	1	CM	-2.69	-1.46	0.21	8	0	Primary 6 or lower	0	0	1	1	0	0	0	3	0		0	1	1	1	1	1	3
727	2.63929	1		3		-1.42	-2.64	-2.23	15	0	Secondary or higher	0	0					0			0							4
728	1.62355	1	2	1	CM	-2.01	-1.36	-0.33	8	0	Primary 7	0	0	1	0	1	0	0	3	2		1	1	0	1	1	0	3
729	2.02327	2	3	1	CM	-2.39	-1.83	-0.8	13	0	Secondary or higher	0	0	1	0	0	0	0	3	0		0	1	1	1	1	1	3
730	3.14031	1		3		-1.06	-1.17	-0.61	15	0	Secondary or higher	0	0					0			0							4
731	2.03696	2		3		-1.05	-0.81	-0.31	9	0	Primary 6 or lower	0	0					0			0							3
732	3.4935	2		3		-1.77	-1.61	-0.57	12	0	Primary 6 or lower	0	0					0			0							3
733	1.73854	1	5	2	SMA	-4.73	-2.75	0.11	12	0	Secondary or higher	0	0	0	0	1	0	0	0	0		1	1	1	1	1	1	4
734	5.72211	2	7	2	SMA	0.07	0.35	0.38	14	1	Secondary or higher	0	0	0	0	1	0	0	1	0		1	1	0	1	1	1	4
735	1.70568	1	7	1	CM	-3.44	-3.1	-1.77	5	0	Primary 7	0	0	1	0	0	0	0	2	2		1	1	0	0	0	0	4
736	3.67967	2		3		-1.34	-0.24	0.75	7	0	Primary 7	0	1					0			0							3
737	3.09103	1		3		-0.96	-1.73	-1.44	8	0	Primary 6 or lower	0	0					0			0							3
738	4.03833	2		3		-0.02	-1.19	-1.32	14	1	Secondary or higher	0	0					0			0							3
739	2.08077	2		3		-1.33	-1.67	-0.96	14	0	Secondary or higher	0	0					0			0							3
740	3.73169	2		3		-1.69	-2.43	-1.78	7	0	Primary 7	0	0					0			0							3
741	5.13621	1	14	2	SMA	-1.39	-1.82	-1.3	12	1	Primary 6 or lower	0	0	0	1	1		0	0	0		1	1	1	1	1	0	3
742	1.97947	1	3	2	SMA	-1.21	-3.39	-3.94	8	0	Primary 6 or lower	0	0	0	0	1	0	0	0	0		0	1	0	1	1	0	3
743	1.59343	2	3	1	CM	-0.73	-1.31	-1.22	9	0	Secondary or higher	0	0	1	1	0	0	0	2	0		1	0	0	1	1	0	3
744	3.45517	1	2	1	CM	1.21	-0.87	-1.83	9	0	Primary 6 or lower	0	0	1	1	1	0	0	2	0		0	1	0	1	1	1	3
745	4.03833	2		3		1.01	-1.19	-2.01	17	1	Secondary or higher	0	0					0			0							3
747	1.60438	2	7	2	SMA	-2.65	-2.36	-1.28	7	0	Primary 6 or lower	0	0	0	0	1	0	0	0	0		0	1	0	1	1	0	3
748	2.79808	2		3		-1.15	-1.18	-0.44	12	0	Secondary or higher	0	0					0			0							3
750	2.94045	1		3		-2.81	-2.86	-1.73	8	0	Secondary or higher	0	0					0			0							3
751	2.62834	2	3	1	CM	-1.2	-0.89	-0.04	10	0	Primary 6 or lower	0	0	1	1	1	0	0	2	1		1	1	0	1	1	0	4
752	3.40589	1	4	1	CM	0.23	-0.48	-0.65	6	0	Primary 6 or lower	0	0	1	0	0	0	0	2	0		0	1	0	1	1	0	3
753	3.12115	1	3	2	SMA	0.99	-2.34	-3.39	14	0	Primary 7	0	0	0	1	1	0	0	1	0		0	1	0	1	1	1	4
754	1.91102	2	1	1	CM	-0.36	-0.52	-0.41	8	0	Primary 7	0	0	1	0	0	0	0	2	2		0	1	0	0	0	0	3
755	4.87064	1	3	2	SMA	-2.74	-2.48	-1.27	6	1	Primary 6 or lower	0	0	0	1	1	0	0	1	0		1	1	0	1	1	1	3
757	3.5729	1	8	1	CM	-2.53	-2.67	-1.77	7	0	Primary 6 or lower	0	0	1	0	0	0	0	2	0		0	1	0	0	0	0	3
758	2.70226	1	3	2	SMA	-0.81	-1.98	-1.77	7	0	Primary 7	0	0	0	0	1	0	0	0	0		0	1		1	1	1	4
759	2.03149	1	1	2	SMA	-0.44	-1.64	-1.34	10	0	Primary 7	0	0	0	1	1	0	0	0	0		0	1	1	1	1	0	4
760	3.96441	2	3	1	CM	-0.77	-0.37	0.22	5	1	Primary 6 or lower	0	0	1	1	0	0	0	2	0		0	1		0	0	1	3
761	3.09103	1		3		-1.22	-1.42	-0.84	8	0	Primary 6 or lower	0	0					0			0							3
762	5.07871	1	7	1	CM	-1.08	-2.24	-2.14	7	1	Secondary or higher	0	0	1	0	0	0	0	2	0		1	1	0	0	0	1	4
763	7.36756	1	1	1	CM	-1.64	0.35	2.28	6	1	Secondary or higher	0	0	1	0	0	0	0	2	2		0	1	0	1	1	0	3
764	2.15469	1		3		-1.25	-1.41	-0.63	12	0	Primary 6 or lower	0	0					0			0							3
765	2.57906	1		3		-2.78	-1.84	-0.18	14	0	Secondary or higher	0	0					0			0							4
766	3.42505	1	7	2	SMA	-2.38	-1.42	0.03	6	0	Primary 7	0	0	0	0	1	0	0	1	0		0	1	1	1	1	0	3
767	2.80903	2		3		-1.81	-1.52	-0.41	12	0	Primary 7	0	0					0			0							4
769	3.86037	2	2	1	CM	-0.22	-0.4	-0.18	9	0	Primary 7	0	0	1	0	0	0	0	2	2		0	1	0	0	0	0	3
770	3.7974	2		3		0.21	-0.67	-0.82	9	1	Secondary or higher	0	0					0			0							4
771	3.07187	2	7	1	CM	-0.52	-1.43	-1.18	5	0	Primary 6 or lower	0	0	1	0	0	0	0	2	0		0	1		1	1	0	4
772	4.87611	2	2	1	CM	-1.31	-1.78	-1.27	14	1	Secondary or higher	0	0	1	1	1	0	0	2	0		1	1	0	1	1	0	3
774	1.88638	1		3		-0.97	-1.03	-0.65	20	0	Secondary or higher	0	0					0			0							3
775	1.76865	2		3		-0.32	-0.34	-0.2	7	0	Secondary or higher	0	0					0			0							3
776	7.44422	1	7	2	SMA	-0.33	-1.37	-1.64	8	1	Secondary or higher	0	0	0	1	1	0	0	0	0		0	1	0	1	1	1	3
777	4.85421	1	2	1	CM	0.22	-1.11	-1.6	10	1	Primary 6 or lower	0	0	1	0	0	0	0	2	1		0		0	1	0	0	3
778	2.49692	2		3		-2.12	-1.51	-0.2	10	0	Primary 6 or lower	0	0					0			0							4
781	4.42437	1		3		-2.42	-3.24	-2.74	9	0	Secondary or higher	0	0					0			0							5
782	5.15537	1	1	1	CM	0.51	-0.46	-1.04	10	1	Primary 7	0	0	1	1	0	0	0	2	0		1	1		1	1	1	4
783	5.67556	2	3	2	SMA	-1.79	-1.33	-0.31	7	1	Primary 6 or lower	0	0	0	0	1	0	0	0	0		0	0		1	1	0	4
785	3.32923	1		3		-1.94	-2.53	-1.94	12	0	Primary 7	0	0					0			0							5
786	3.77823	2		3		-1.14	-1.56	-0.98	11	0	Primary 7	0	0					0			0							4
787	3.30459	2		3		-1.41	-0.46	0.58	10	1	Secondary or higher	0	0					0			0							5
788	2.17112	1	7	1	CM	-0.9	-0.56	0.07	9	0	Secondary or higher	0	0	1	0	0	0	0	3	2		0	1	1	1	1	1	5
789	4.96099	2	1	2	SMA	-2.46	-2.1	-0.85	8	0	Primary 6 or lower	0	0	0	1	1		0	1	0		1	1	1	1	1	1	5
790	2.10541	2	10	2	SMA	-0.37	-0.82	-0.59	7	0	Secondary or higher	0	0	0	1	1	0	0	0	0		0	1	0	1	1	1	5
791	2.40657	2	2	2	SMA	-1.84	-2.11	-1.15	8	0	Secondary or higher	0	0	0	1	1	0	0	1	0		0	1		1	1	1	4
793	3.70431	2	4	1	CM	0.07	-0.84	-0.92	11	1	Primary 7	0	0	1	0	0	0	0	2	4		0	1	0	0	0	0	5
794	4.85147	2	4	1	CM	-1.29	-2.82	-2.69	10	1	Secondary or higher	0	0	1	0	0	0	0	2	0		0	1	0	1	1	1	5
795	2.0835	1	5	2	SMA	3.11	0.33	-1.33	12	1	Primary 7	0	0	0	1	1	0	0	1	0		0	1	0	1	1	1	5
796	1.63723	2	4	1	CM	-0.21	-0.87	-0.98	12	0	Primary 6 or lower	0	0	1	0	0	0	0	2	0		0	1	0	1	0	1	5
797	5.00753	2	3	2	SMA	-2.77	-2.92	-1.86	6	0	Secondary or higher	0	0	0	0	1	0	0	0	0		0	1		1	1	0	4
798	5.24298	1	3	1	CM	-2.62	-1.88	-0.36			Not known	0	0	1	0	0	0	0	2	4		0	1	0	0	0	1	5
799	2.87474	1	1	1	CM	-0.6	-2.11	-2.11	9	0	Primary 7	0	0	1	0	0	0	0	2	3		0	1		1	1	0	4
800	3.39493	2	2	2	SMA	-2.07	-0.53	0.91	16	0	Primary 7	0	0	0	0	1	0	0	1	0		0	1		1	1	1	5
801	3.31554	2	3	1	CM	-1.62	-0.42	0.74	11	0	Primary 6 or lower	0	0	1	0	0	0	0	3	0		0	1		1	1	1	4
802	7.07187	1	2	2	SMA	-0.52	-1.86	-2.15	13	1	Secondary or higher	0	0	0	1	1	0	0	0	0		0	1	0	1	1	1	5
803	6.0835	2	3	1	CM	-0.88	1.61	3.34	20	1	Secondary or higher	0	0	1	0	0	0	0	2	0		0	1	1	1	1	1	5
804	5.34702	1	5	1	CM	-1.04	-1.04	-0.48	11	1	Secondary or higher	0	0	1	1	1	0	0	3	0		0	1		1	1	1	4
805	3.06092	1	4	2	SMA	0.47	-1.68	-2.27	9	1	Secondary or higher	0	0	0	1	1	0	0	1	0		0	1	1	1	1	1	5
806	6.84463	1	7	1	CM	0.24	0.45	0.4	6	1	Primary 7	0	0	1	1	0	0	0	2	2		0	0	0	1	1	1	5
808	2.4668	2	4	1	CM	-2.31	-2.51	-1.34	12	0	Secondary or higher	0	0	1	0	0	0	0	2	3		0	1		1	1	1	4
809	4.75565	1	10	2	SMA	-1.42	-1.03	-0.13	14	1	Secondary or higher	0	0	0	1	1	0	0	1	0		0	1	1	1	1	1	5
810	2.91581	2		3		0.22	-0.64	-0.71	9	0	Primary 6 or lower	0	0					0			0							4
811	4.21355	2		3		-3.85	-3.91	-2.58	9	1	Secondary or higher	0	0					0			0							5
812	6.74606	2	7	2	SMA	-0.87	-1.58	-1.55	7	1	Primary 6 or lower	0	0	0	0	1	0	0	1	0		0	1	1	1	1	1	5
814	4.70363	1	3	1	CM	-2.37	-1.96	-0.74	11	1	Primary 6 or lower	0	0	1	0	0	0	0	2	4		1	1	0	1	1	1	5
815	2.35729	1	6	1	CM	1.08	-0.84	-1.49	10	1	Secondary or higher	0	0	1	0	0	0	0	2	3		0	1	0	1	1	1	5
816	1.7358	1	4	1	CM	-1.92	0.95	2.65	10	0	Primary 7	0	0	1	0	0	0	0	2	3		1	1	0	1	1	1	5
817	2.84189	2		3		-0.42	-1.24	-1	14	0	Secondary or higher	0	0					0			0							5
818	4.16153	2	7	2	SMA	0.38	-0.67	-1	10	1	Primary 7	1	0	0	0	1	0	0	0	0		0	0	1	1	1	1	5
820	2.04244	1	3	2	SMA	-1.48	-2.1	-1.18	11	0	Primary 6 or lower	0	0	0	0	1	0	0	0	0		0	1		1	1	0	4
821	9.08966	2	5	1	CM	0.23	-0.83	-1.51	18	1	Secondary or higher	0	0	1	0	0	0	0	2	0		0	0		0	0	0	4
822	1.74127	2	3	2	SMA	-1.83	-2.72	-2.44	11	0	Primary 6 or lower	0	0	0	0	1	0	0	1	0		0	1	1	1	1	1	5
823	4.85421	2		3		-1.61	-2.07	-1.44	7	0	Primary 6 or lower	0	0					0			0							4
824	3.58932	2	7	2	SMA	-1.63	-1.01	0.11	7	0	Primary 6 or lower	0	0	0	0	1	0	0	1	0		0	1	1	1	1	1	5
825	7.21424	1	14	2	SMA	-0.8	-0.83	-0.34	17	1	Primary 6 or lower	0	0	0	0	1	0	0	1	0		0	0	1	1	1	1	5
826	5.33607	1	3	2	SMA	-0.61	-1.96	-2.11	16	1	Secondary or higher	0	0	0	1	1	0	0	2	0		1	1	1	1	1	1	5
827	2.67214	1	4	2	SMA	-0.73	-0.57	-0.05	6	0	Primary 6 or lower	0	0	0	1	1	0	0	0	0		0	1	1	1	1	1	5
828	2.6256	1		3		-2.39	-3.32	-2.52	9	0	Secondary or higher	0	0					0			0							5
830	3.96441	2	4	2	SMA	-4.01	-3.47	-1.72	8	1	Secondary or higher	0	0	0	0	1	0	0	2	0		0	1	1	1	1	1	5
832	2.49418	1		3		-1.81	-0.36	0.76	17	0	Primary 7	0	0					0			0							5
833	2.39836	1	1	1	CM	0.38	0.49	0.46	14	0	Primary 7	0	0	1	1	0	0	0	2	0		0	1	0	0	0	0	5
834	4.52019	2	2	2	SMA	-0.92	-1.54	-1.2	9	0	Secondary or higher	0	0	0	1	1	0	0	1	0		1	1		1	1	1	5
835	2.32444	1	2	1	CM	-0.36	-1.55	-1.41	8	0	Primary 6 or lower	0	0	1	1	0	0	0	2	0		0	1		0	0	0	4
837	1.65092	2	7	2	SMA	-1.04	-1.74	-1.61	6	0	Primary 7	0	0	0	0	1	0	0	2	0		0	1	1	1	1	1	5
838	3.56742	1	3	1	CM	-3.01	-1.53	0.29	14	0	Primary 6 or lower	0	0	1	1	0	0	0	2	0		1	1	0	1	1	1	5
839	2.24778	2	4	2	SMA	-1.39	-2.67	-2.11	13	0	Primary 7	0	0	0	0	1	0	0	0	0		0	0		1	1	0	5
840	3.16222	2		3		-0.04	0.54	0.91	11	0	Primary 6 or lower	0	0					0			0							5
842	3.03901	1	7	2	SMA	-3.79	-3.52	-2.05	8	0	Primary 6 or lower	0	0	0	0	1	1	0	1	0		0	1	1	1	1	1	5
843	2.21766	2	5	2	SMA	-0.55	-0.21	0.2	9	0	Secondary or higher	0	0	0	0	1	0	0	0	0		0	1		1	1	1	4
846	2.79261	2		3		-0.58	-1.18	-0.82	8	0	Secondary or higher	0	0					0			0							4
851	4.74743	1	2	1	CM	-2.08	-1.99	-1.03	16	1	Secondary or higher	0	0	1	0	0	0	0	2	0		0	1		0	0	1	4
864	2.3436	2		3		-1.16	-2.06	-1.53	7	0	Secondary or higher	0	0					0			0							4
902	2.6037	2		3		-2.94	-0.92	0.92	9	0	Secondary or higher	0	0					0			0							5
903	3.86585	1		3		-0.7	-1.84	-1.84	13	0	Secondary or higher	0	0					0			0							5
906	3.04449	2	14	2	SMA	-2.23	-2.75	-1.77	8	0	Primary 6 or lower	0	1	0	0	1	0	0	1	0		0	1	0	1	1	1	5
911	3.55647	1		3		-1.85	-2.41	-1.86	8	0	Primary 7	0	0					0			0							5
912	1.95756	2	6	2	SMA	-1.92	-0.78	0.33	14	0	Secondary or higher	0	0	0	1	1	0	0	2	0		0	1	1	1	1	1	5
917	2.27242	2	7	2	SMA	-3.99	-4.31	-2.39	14	0	Secondary or higher	0	0	0	0	1	0	0	1	0		0	1	1	1	1	1	5
919	3.01711	2		3		-2.16	-2.46	-1.43	13	0	Secondary or higher	0	0					0			0							5
921	3.58932	2	3	1	CM	-1.32	-0.7	0.25	10	0	Secondary or higher	0	0	1	1	0	0	0	2	0		0	1	1	1	1	1	5
924	2.19576	1	2	1	CM	-2.18	-1.42	-0.01	10	0	Secondary or higher	0		1	0	1	0	0	2	1		0	1	0	1	1	1	5
927	1.68104	1		3		-0.44	-1.52	-1.7	7	0	Primary 7	0	0					0			0							5
930	1.68104	2	5	2	SMA	-1.34	-0.97	-0.36	10	0	Secondary or higher	0	0	0	0	1	0	0	1	0		0	1	1	1	1	1	5
940	1.92471	2		3		-1.6	-0.2	0.91	6	0	Primary 7	0	0					0			0							5
941	5.10609	1	7	2	SMA	-0.73	-0.85	-0.48	8	1	Primary 6 or lower	0	1	0	1	1	0	0	1	0		0	1	1	1	1	1	5
943	3.48255	1	3	2	SMA	-3.89	-2.61	-0.63	7	0	Primary 6 or lower	0	0	0	0	1	0	0	1	0		0	1	0	1	1	1	5
955	3.91786	1		3		-1.02	-1.35	-0.92	9	1	Primary 7	0	0					0			1							5
968	2.13826	2	5	2	SMA	-1.72	-0.87	0.18	9	0	Primary 6 or lower	0	0	0	0	1	0	0	1	0		0	1	0	1	1	1	5
969	1.97125	2	3	1	CM	-0.43	-2.25	-2.69	8	0	Primary 6 or lower	0	0	1	0	1	0	0	2	0		1	1	1	1	1	1	5
972	2.21492	1		3		-0.07	-1.49	-1.5	9	0	Primary 6 or lower	0	1					0			0							5
975	3.6742	2	2	1	CM	-2.46	1.25	3.72	16	0	Primary 6 or lower	0	0	1	0	0	0	0	2	1		0	1	1	0	0	1	5
978	1.71116	1	6	2	SMA	-3.08	-1.35	0.53	8	0	Primary 7	0	0	0	0	1	0	0	1	0		0	1	1	1	1	1	5
979	3.03628	2		3		3.32	0.42	-1.45	9	0	Primary 6 or lower	0	0					0			0							5
980	6.48871	1	4	1	CM	-1.41	-1.87	-1.31	10	1	Primary 6 or lower	0		1	1	0	0	0	2	0		1	1	0	0	0	1	5
982	2.00137	2	3	2	SMA	-0.66	-1.49	-1.51	16	0	Primary 7	1	0	0	1	1	0	0	1	0		0	1	1	1	1	1	5
983	4.05476	2	4	2	SMA	-1.68	-1.76	-0.89	10	1	Primary 6 or lower	1	0	0	1	1	0	0	0	0		0	1	0	1	1	1	5
985	3.53183	1	4	2	SMA	-2	-2.54	-1.94	7	0	Primary 6 or lower	0	0	0	1	1	0	0	1	0		0	1	1	1	1	1	5
986	4.71732	1	4	1	CM	-1.18	-1.97	-1.7	18	1	Secondary or higher	0	0	1	0	0	0	0	2	0		0	1	0	1	1	1	5
987	4.43806	1	3	1	CM	-2.67	-1.74	-0.17	6	1	Primary 6 or lower	0	0	1	1	0	0	0	2	0		1	1	1	1	1	1	5
988	3.37303	1	4	2	SMA	-3.96	-2.18	0.1	7	0	Primary 6 or lower	0	0	0	0	1	0	0	1	0		0	1	1	1	1	1	5
989	4.06023	2	3	1	CM	-1.09	1.71	3.39	7	1	Primary 7	0	0	1	0	0	0	0	3	0		0	1	1	0	0	1	5
992	2.95688	1	7	2	SMA	-0.56	0.08	0.57	6	0	Secondary or higher	0	0	0	0	1	0	0	0	0		0	0	0	1	1	1	5
994	3.24983	2	2	2	SMA	-0.2	-0.49	-0.25	9	0	Primary 6 or lower	0	0	0	1	1	0	0	0	0		1	0	1	1	1	1	5
995	2.48871	2	1	2	SMA	-2.81	-2.39	-0.85	6	0	Secondary or higher	0	0	0	0	1	0	0	0	0		0	0	1	1	1	1	5
997	3.45517	1	2	1	CM	-1.1	0.26	1.22	6	0	Primary 6 or lower	0	0	1	0	0	0	0	2	0		0	1	1	0	0	1	5
999	4.04654	1	2	2	SMA	0.48	-1.16	-1.77	10	0	Primary 6 or lower	0	0	0	1	1	0	0	1	0		0	1	1	1	1	1	5

## Sheet: Wide Codebook
Variable Name	Label
studyid	StudyID
agefin00	Age at baseline
sex	Sex (Male==1, Female==2)
fevedays	Duration of fever in days from history
group	Group (CM=1, SMA=2, CC=3)
sgroup	Severe malaria group
haz	height-for-age z score enrollment
waz	weight-for-age z score enrollment
whz	weight-for-height z score enrollment
totalses	Total socioeconomic status score
preschool_education	Child's preschool education (1=yes, 0=no)
educm	Maternal education
sickler	Child has sicle cell anemia (HbSS)
hivscr	HIV status
coma	Coma on admission
jaun	Jaundice on admission
sma	Severe anemia on admission
hypoglyc	Hypoglycemia on admission
shock	Shock on admission
lods	Lambarene Organ Dysfunction Score (one point for coma, prostration, deep breathing)
seizeno	Number of seizures during hospitalization
pcr_fal0	Malaria PCR positive for P. falciparum in CC
aki0	Acute Kidney Injury on admission by KDIGO guidelines
prerenal	Prerenal (BUN:Cr ratio>20)
lacidosis	Lactic acidosis (lactate>5mmol/L)
ivfluids	IV fluids administered during hospitalization
transfus	Transfusion administered during hospitalization
parenteral_art	Whether artemisinin-based antimalarials were administered (yes=1, no=0).
year	Year of study centered from 2008
	School Age BRIEF (Metacognition Index, monitor

## Sheet: Long Dataset
studyid	agefin00	sex	visit	haz	waz	zhome	sgroup	group	totalses	preschool_education	educm	parenteral_art	year	pcr_fal0	aki0	jaun	seizeno	coma	lacidosis	hypoglyc	lods	transfus	ivfluids	zintern	zanxiou	zwithdx	zsomcom	zemotio	zextern	zaggres	zattenx	zslep	preclby	preansgp	zglobex	zmetaco	zselfco	zflexib	zinhibi	zshift	zemotco	zorgpla	zworkme	briefby	ansbrigp	zintpro	zanxdep	zwithde	zsomco_
1	4	1	0	-3.92	-3.5	-0.54105	CM	1	8	0	Primary 7	0	1		0	0	2	1	0	0	2	0	0	0.306279	0.435525	1.58974	0.0747451	-1.0004	-0.178907	-0.0189768	-0.610235	1.21419	5	Other
1	4	1	6	-3.92	-3.5	-0.54105	CM	1	8	0	Primary 7	0	1		0	0	2	1	0	0	2	0	0	-0.748554	-0.824012	0.12604	-0.369889	-0.985646	-0.342795	-0.219421	-0.585286	1.89951	1	Other
1	4	1	12	-3.92	-3.5	-0.54105	CM	1	8	0	Primary 7	0	1		0	0	2	1	0	0	2	0	0	-0.0602229	-0.0662893	0.621471	-0.383824	-0.316249	0.338963	0.559045	-0.557898	-0.409462	1	Other
1	4	1	24	-3.92	-3.5	-0.54105	CM	1	8	0	Primary 7	0	1		0	0	2	1	0	0	2	0	0																							2.57986	0.799551	3.31576	2.17028
2	4.72827	2	0	1.37	0.68	0.846043		3	9	1	Primary 7		0	0										1.27428	1.61023	0.808595	-0.669583	1.61355	2.33473	2.17228	1.708	1.10162	2	Mother
2	4.72827	2	6	1.37	0.68	0.846043		3	9	1	Primary 7		0	0										1.33751	1.02224	-0.653015	1.47715	1.95523	1.93298	1.69598	1.73349	0.587747	5	Mother
2	4.72827	2	12	1.37	0.68	0.846043		3	9	1	Primary 7		0	0										-0.710966	-0.238599	-0.558496	-1.12698	-0.316475	0.690114	0.384139	1.30861	-0.529869	1	Mother
2	4.72827	2	24	1.37	0.68	0.846043		3	9	1	Primary 7		0	0																																1.74807	2.22727	0.796375	0.742496
3	3.35113	2	0	-1.23	-1.78	1.01085	CM	1	8	0	Primary 6 or lower	0	0		0	0	2	1		0	2	0	1	0.360644	1.39131	-0.623911	0.660939	-0.386381	0.0922798	0.157568	-0.157891	0.269267	2	Mother
3	3.35113	2	6	-1.23	-1.78	1.01085	CM	1	8	0	Primary 6 or lower	0	0		0	0	2	1		0	2	0	1	1.04191	2.1399	-0.919338	0.216512	1.26114	0.0469093	0.233401	-0.582772	2.75477	5	Mother
3	3.35113	2	12	-1.23	-1.78	1.01085	CM	1	8	0	Primary 6 or lower	0	0		0	0	2	1		0	2	0	1	-0.0122474	0.211424	-0.822208	-0.22826	0.622845	0.00359326	0.172561	-0.557552	0.438416	1	Mother
3	3.35113	2	24	-1.23	-1.78	1.01085	CM	1	8	0	Primary 6 or lower	0	0		0	0	2	1		0	2	0	1	-0.137317	0.370714	-0.631082	-0.253508	-0.00101649	1.59099	1.43604	1.28976	-0.593933	1	Mother
6	3.16496	2	0	0.03	-2.23	-0.714437	CM	1	7	0	Primary 6 or lower	0	1		1	1	7	1	0	0	2	1	1	1.57857	0.691912	-0.269475	2.82534	1.56778	1.02233	1.37798	-0.616533	2.03948	5	Mother
6	3.16496	2	6	0.03	-2.23	-0.714437	CM	1	7	0	Primary 6 or lower	0	1		1	1	7	1	0	0	2	1	1	1.64011	1.10646	-0.173912	1.51689	2.23565	0.139537	0.0669819	0.307124	-0.878767	1	Mother
6	3.16496	2	12	0.03	-2.23	-0.714437	CM	1	7	0	Primary 6 or lower	0	1		1	1	7	1	0	0	2	1	1	-0.159869	0.180958	-0.0788708	-0.655373	-0.0359698	0.693327	0.698301	0.331801	-0.794884	1	Mother
6	3.16496	2	24	0.03	-2.23	-0.714437	CM	1	7	0	Primary 6 or lower	0	1		1	1	7	1	0	0	2	1	1	3.18895	2.34924	2.06146	3.63886	1.6263	1.08282	0.851224	1.28014	1.77542	1	Mother	3.24005	2.34835	2.81354	3.24503	2.79735	4.26885	2.07799	2.39269	2.02658	1	Other
7	3.30459	2	0	-2.54	-1.2	-1.06121	CM	1	7	0	Not known	0	1		1	0	2	1	0	0	2	0	0	-1.00995	-0.625508	-0.242842	-0.633712	-1.36755	-1.23195	-0.95969	-1.50846	0.261432	5	Mother
7	3.30459	2	6	-2.54	-1.2	-1.06121	CM	1	7	0	Not known	0	1		1	0	2	1	0	0	2	0	0	-1.31997	-1.2148	-0.926127	-0.214533	-1.35272	-1.39543	-1.43725	-0.584534	-0.85434	1	Mother
7	3.30459	2	12	-2.54	-1.2	-1.06121	CM	1	7	0	Not known	0	1		1	0	2	1	0	0	2	0	0	1.855	1.55887	3.08665	0.63438	0.297686	0.0109899	-0.0974311	0.343733	-0.754325	2	Mother
7	3.30459	2	24	-2.54	-1.2	-1.06121	CM	1	7	0	Not known	0	1		1	0	2	1	0	0	2	0	0	0.606823	-0.634434	2.87791	-0.68538	0.325505	0.872083	0.880551	0.390783	-0.594394	2	Mother	-0.277735	0.548867	-0.678369	-1.13293	-0.137052	-1.11822	-1.00999	-0.713606	1.12299	1	Mother
8	4.08214	1	0	-0.72	-1.2	0.325883	SMA	2	7	1	Not known	1	1		0	1	0	0	0	0	1	1	1	-0.552188	-0.891035	-0.734271	0.936558	-0.67139	-1.12458	-1.25531	-0.156745	4.83113	3
8	4.08214	1	6	-0.72	-1.2	0.325883	SMA	2	7	1	Not known	1	1		0	1	0	0	0	0	1	1	1	0.00601111	-0.141147	-0.638186	2.21969	-0.983241	-1.52796	-1.31699	-1.48006	4.91593	1	Other
8	4.08214	1	12	-0.72	-1.2	0.325883	SMA	2	7	1	Not known	1	1		0	1	0	0	0	0	1	1	1	1.30801	1.27768	1.01664	1.77519	0.0111543	-0.016177	0.146934	-0.556542	5	2	Other
8	4.08214	1	24	-0.72	-1.2	0.325883	SMA	2	7	1	Not known	1	1		0	1	0	0	0	0	1	1	1																							1.47248	0.79926	1.61863	1.05855
9	4.8898	2	0	0.53	-1.28	-1.2346	CM	1	7	0	Primary 7	0	1		1	0	0	1	1	0	2	0	0	-0.442984	-1.71313	0.449459	1.05411	-0.667928	-0.874273	-0.855876	-0.531112	-0.0722279	5	Mother
9	4.8898	2	6	0.53	-1.28	-1.2346	CM	1	7	0	Primary 7	0	1		1	0	0	1	1	0	2	0	0	-1.74564	-1.63262	-0.623772	-1.5503	-1.3063	-1.03775	-0.778367	-1.40487	-0.587481	3	Mother
9	4.8898	2	12	0.53	-1.28	-1.2346	CM	1	7	0	Primary 7	0	1		1	0	0	1	1	0	2	0	0	-1.3132	-1.55471	-0.530297	-0.266822	-1.29195	-1.20369	-1.25844	-0.481758	-0.50498	1	Mother
9	4.8898	2	24	0.53	-1.28	-1.2346	CM	1	7	0	Primary 7	0	1		1	0	0	1	1	0	2	0	0																							-1.25586	-1.53486	-0.471085	-0.733826
11	1.85626	1	0	-0.24	-0.92	-0.312634	CM	1	8	0	Primary 6 or lower	0	1		1	1	0	1	0	0	2	1	1	0.0429479	0.764556	-0.378929	-1.16706	0.569839	1.05608	1.45694	-0.716401	0.252787	5	Other
11	1.85626	1	6	-0.24	-0.92	-0.312634	CM	1	8	0	Primary 6 or lower	0	1		1	1	0	1	0	0	2	1	1	0.476394	0.843766	-1.06378	0.548145	0.911031	1.96912	1.67196	2.00481	-0.864367	1	Other
11	1.85626	1	12	-0.24	-0.92	-0.312634	CM	1	8	0	Primary 6 or lower	0	1		1	1	0	1	0	0	2	1	1	0.166037	0.254038	0.592089	0.103511	-0.380624	2.40398	1.88782	2.9286	0.421475	2	Other
11	1.85626	1	24	-0.24	-0.92	-0.312634	CM	1	8	0	Primary 6 or lower	0	1		1	1	0	1	0	0	2	1	1	-1.18402	-1.24074	-0.752026	-0.35692	-1.00072	-0.5398	-0.436954	-0.610777	-0.589212	1	Other	0.0498445	0.943501	-0.95715	-0.401512	-0.935685	0.286569	-0.85197	2.06731	0.279258	1	Other
12	1.95483	1	0	0.2	-1.84	0.481456	CM	1	8	0	Primary 7	1	1		0	1	1	1	0	1	2	1	1	0.799531	0.780224	-0.36013	0.990158	0.899326	0.232624	0.500657	-0.71152	-0.931658	5	Mother
12	1.95483	1	6	0.2	-1.84	0.481456	CM	1	8	0	Primary 7	1	1		0	1	1	1	0	1	2	1	1	-0.256647	-0.481053	0.513758	-0.318082	-0.392649	1.14484	1.54744	-0.687114	-0.848697	1	Mother
12	1.95483	1	12	0.2	-1.84	0.481456	CM	1	8	0	Primary 7	1	1		0	1	1	1	0	1	2	1	1	1.30125	1.9525	-0.159082	0.963599	0.930191	0.869833	0.939493	0.239526	3.44942	1	Mother
12	1.95483	1	24	0.2	-1.84	0.481456	CM	1	8	0	Primary 7	1	1		0	1	1	1	0	1	2	1	1	0.424305	1.76731	-0.759336	-0.355954	0.304566	1.01119	1.36115	-0.612675	-0.595665	7	Mother	0.034894	-0.942102	1.47655	0.347054	1.18785	-0.816364	1.23337	-0.480347	-1.02198	1	Mother
13	5.13347	1	0	-1.2	-1.34	-0.54105	SMA	2	9	0	Secondary or higher	0	1		0	1	0	0	0	0	0	1	1
13	5.13347	1	6	-1.2	-1.34	-0.54105	SMA	2	9	0	Secondary or higher	0	1		0	1	0	0	0	0	0	1	1	0.382977	0.69535	0.34171	0.033562	0.0272682	-0.412579	-0.601456	0.369556	-0.312213	1	Mother
13	5.13347	1	12	-1.2	-1.34	-0.54105	SMA	2	9	0	Secondary or higher	0	1		0	1	0	0	0	0	0	1	1																							-0.583956	-0.141436	-0.501939	-0.793793
13	5.13347	1	24	-1.2	-1.34	-0.54105	SMA	2	9	0	Secondary or higher	0	1		0	1	0	0	0	0	0	1	1																							-1.51224	-1.40686	-1.31052	-0.743441
14	2.5024	2	0	-2.86	-0.68	2.06964	SMA	2	8	0	Primary 6 or lower	0	0		1	1	0	0	0	0	0	1	1	0.380467	-0.753027	1.16394	-0.181558	0.895172	1.28214	1.41536	0.249499	-1.07465	2	Other
14	2.5024	2	6	-2.86	-0.68	2.06964	SMA	2	8	0	Primary 6 or lower	0	0		1	1	0	0	0	0	0	1	1	-0.550959	-0.338914	-0.300807	0.237828	-1.04985	0.0396803	0.242707	-0.624669	0.210273	5	Mother
14	2.5024	2	12	-2.86	-0.68	2.06964	SMA	2	8	0	Primary 6 or lower	0	0		1	1	0	0	0	0	0	1	1	-0.986068	-1.26442	-0.205766	-0.638609	-0.708654	0.952719	1.01279	0.298853	-0.906882	1	Mother
14	2.5024	2	24	-2.86	-0.68	2.06964	SMA	2	8	0	Primary 6 or lower	0	0		1	1	0	0	0	0	0	1	1	-0.854235	-0.424002	-0.780954	-0.23371	-1.00383	-0.802192	-0.765709	-0.54684	-0.726211	1	Other
15	1.54689	1	0	-1.28	-0.48	-1.10672		3	8	0	Secondary or higher		1	0										1.24574	0.715377	0.341954	1.86432	0.887381	0.530644	0.854532	-0.731723	2.60278	1	Mother
15	1.54689	1	6	-1.28	-0.48	-1.10672		3	8	0	Secondary or higher		1	0										-1.4302	-1.55932	-1.13428	-0.306424	-1.0594	-0.601105	-0.188569	-1.60887	3.87756	3	Mother
15	1.54689	1	12	-1.28	-0.48	-1.10672		3	8	0	Secondary or higher		1	0										0.368458	0.194849	0.911015	-0.319048	0.261676	-0.286404	-0.111898	-0.685216	0.358794	1	Mother
15	1.54689	1	24	-1.28	-0.48	-1.10672		3	8	0	Secondary or higher		1	0										-0.377344	-0.651009	-0.458165	0.519655	-0.362265	-0.735162	-0.65281	-0.635726	-0.674017	1	Mother	-0.920426	-1.58422	-0.482956	0.309031	-1.28984	0.391411	0.255781	-1.90001	-1.17475	1	Mother
17	5.72758	2	0	-0.94	-0.92	0.672657		3	11	1	Primary 6 or lower		1	0										-0.712312	-0.24034	-0.560585	-0.694762	-0.643397	-0.269528	-0.172605	-0.489622	-0.531712	2	Other
17	5.72758	2	6	-0.94	-0.92	0.672657		3	11	1	Primary 6 or lower		1	0																																-0.319384	0.0393185	-0.496028	-0.393868
17	5.72758	2	12	-0.94	-0.92	0.672657		3	11	1	Primary 6 or lower		1	0																																0.166044	0.346721	0.373159	-0.368828
17	5.72758	2	24	-0.94	-0.92	0.672657		3	11	1	Primary 6 or lower		1	0																																-0.602931	-0.292562	-0.433452	-0.687012
19	1.56879	1	0	-0.36	-3.01	2.59903	SMA	2	11	0	Secondary or higher	0	0		0	1	0	0	0	0	0	1	1	-0.240523	-0.285854	-0.0438145	-0.295939	-0.0917818	1.01293	0.857884	1.06705	1.40543	2	Other
19	1.56879	1	6	-0.36	-3.01	2.59903	SMA	2	11	0	Secondary or higher	0	0		0	1	0	0	0	0	0	1	1	0.192587	0.127825	-1.11913	0.555458	0.902533	1.68606	1.62755	1.09159	1.48885	5	Other
19	1.56879	1	12	-0.36	-3.01	2.59903	SMA	2	11	0	Secondary or higher	0	0		0	1	0	0	0	0	0	1	1
19	1.56879	1	24	-0.36	-3.01	2.59903	SMA	2	11	0	Secondary or higher	0	0		0	1	0	0	0	0	0	1	1	1.00132	0.371547	0.733083	0.516827	1.27403	1.07793	0.890804	1.16752	2.34747	1	Other
21	1.68378	1	0	-0.11	-1.51	1.01085	SMA	2	13	0	Primary 7	0	1		0	1	0	0	0	0	0	1	1	1.0144	0.737138	0.75801	-1.16272	2.1978	1.26969	1.56932	-0.275521	0.223751	2	Mother
21	1.68378	1	6	-0.11	-1.51	1.01085	SMA	2	13	0	Primary 7	0	1		0	1	0	0	0	0	0	1	1	0.0826324	1.82062	-0.317309	-1.1752	-0.400506	0.74532	0.67378	0.647865	0.307173	5	Mother
21	1.68378	1	12	-0.11	-1.51	1.01085	SMA	2	13	0	Primary 7	0	1		0	1	0	0	0	0	0	1	1	-0.227052	0.896863	-1.00007	-0.324153	-0.385594	0.582254	0.0578725	2.02135	0.3929	1	Mother
21	1.68378	1	24	-0.11	-1.51	1.01085	SMA	2	13	0	Primary 7	0	1		0	1	0	0	0	0	0	1	1	-0.228378	0.0510055	-0.809468	-0.349332	0.29687	0.133496	0.072028	0.273153	0.561127	1	Mother
23	2.00137	1	0	-1.06	-0.44	1.01085	SMA	2	10	0	Not known	0	0		0	1	0	0	0	0	0	1	1	0.433011	0.117815	1.20853	0.125103	-0.0791152	-0.23939	-0.186055	-0.259793	-0.923823	2	Other
23	2.00137	1	6	-1.06	-0.44	1.01085	SMA	2	10	0	Not known	0	0		0	1	0	0	0	0	0	1	1	-0.00209861	0.197025	0.133734	0.544489	-0.717728	-1.72135	-1.49747	-1.58338	-0.83994	5	Other
23	2.00137	1	12	-1.06	-0.44	1.01085	SMA	2	10	0	Not known	0	0		0	1	0	0	0	0	0	1	1	-0.189049	-0.393574	-0.161171	-0.331948	0.276668	-0.449059	-0.172318	-1.10928	-0.756056	1	Other
23	2.00137	1	24	-1.06	-0.44	1.01085	SMA	2	10	0	Not known	0	0		0	1	0	0	0	0	0	1	1	1.17517	1.10577	2.7601	-1.22115	0.632691	0.540003	0.397743	0.738168	0.0136113	2	Other
24	4.67351	2	0	-0.15	-1.61	-1.06121	SMA	2	7	1	Not known	0	1		0	0	0	0	0	0	1	1	1	-1.08995	-0.407899	-0.761633	-0.668203	-1.32746	-0.307988	-0.333906	-0.0924013	-0.108639	1	Mother
24	4.67351	2	6	-0.15	-1.61	-1.06121	SMA	2	7	1	Not known	0	1		0	0	0	0	0	0	1	1	1	-1.02874	-0.998497	-0.666592	-0.248817	-0.986272	-0.831947	-0.812722	-0.517147	-0.625274	5	Mother
24	4.67351	2	12	-0.15	-1.61	-1.06121	SMA	2	7	1	Not known	0	1		0	0	0	0	0	0	1	1	1	-0.836055	-0.909713	-0.560063	0.169051	-0.969918	-0.867866	-1.14355	0.409358	-0.531251	1	Mother
24	4.67351	2	24	-0.15	-1.61	-1.06121	SMA	2	7	1	Not known	0	1		0	0	0	0	0	0	1	1	1																							-0.468887	-0.905683	-0.4794	0.368788
28	3.13758	1	0	-3.05	-2.96	-0.02089	CM	1	10	0	Secondary or higher	0	1		1	1	2	1	1	0	3	1	1
28	3.13758	1	6	-3.05	-2.96	-0.02089	CM	1	10	0	Secondary or higher	0	1		1	1	2	1	1	0	3	1	1	-0.10598	-0.286075	-0.032187	-1.21287	0.949672	0.61044	0.625001	0.272475	1.15934	1	Mother
28	3.13758	1	12	-3.05	-2.96	-0.02089	CM	1	10	0	Secondary or higher	0	1		1	1	2	1	1	0	3	1	1	-0.421382	0.122381	-0.723827	-0.360645	-0.343185	0.560138	0.557039	0.295389	0.636714	1	Mother
28	3.13758	1	24	-3.05	-2.96	-0.02089	CM	1	10	0	Secondary or higher	0	1		1	1	2	1	1	0	3	1	1	-0.422708	-0.723476	-0.533223	0.478058	-0.313924	0.71013	0.432428	1.24372	0.804941	1	Mother	0.718373	1.3731	0.576503	-0.248766	0.665319	-0.966806	0.329041	1.8084	0.977966	1	Mother
30	1.95209	1	0	-0.22	-2.59	-0.842027	CM	1	4	0	Secondary or higher	0	1		1	1	0	1	1	0	2	1	1	0.675116	0.109981	1.97902	0.558286	-0.40716	-0.725786	-0.887431	0.187189	0.268919	4	Mother
30	1.95209	1	6	-0.22	-2.59	-0.842027	CM	1	4	0	Secondary or higher	0	1		1	1	0	1	1	0	2	1	1	-0.627204	-0.478877	0.516369	-0.750368	-1.04545	-0.409852	-0.531969	0.212409	2.1562	1	Mother
30	1.95209	1	12	-0.22	-2.59	-0.842027	CM	1	4	0	Secondary or higher	0	1		1	1	0	1	1	0	2	1	1	-1.18572	-0.398796	-0.947329	-1.195	-1.0307	-1.29224	-1.00995	-1.56033	0.439451	1	Mother
30	1.95209	1	24	-0.22	-2.59	-0.842027	CM	1	4	0	Secondary or higher	0	1		1	1	0	1	1	0	2	1	1	0.804614	0.438136	1.59287	0.0743312	0.30649	-0.775191	-1.26537	1.18827	-0.584603	1	Mother
34	1.9603	1	0	-4.11	-2.61	-0.0479372	CM	1	4	0	Primary 6 or lower	0	1		1	0	0	1	0	0	2	1	1	2.41324	2.12071	1.59064	4.01361	-0.0803177	0.832195	0.917796	0.187596	5	5	Other
34	1.9603	1	6	-4.11	-2.61	-0.0479372	CM	1	4	0	Primary 6 or lower	0	1		1	0	0	1	0	0	2	1	1	0.865448	0.865527	1.69195	0.544696	-0.391367	-0.285582	0.166474	-1.58379	1.56075	1	Other
34	1.9603	1	12	-4.11	-2.61	-0.0479372	CM	1	4	0	Primary 6 or lower	0	1		1	0	0	1	0	0	2	1	1	-0.683349	-0.390962	-0.547984	-1.19624	-0.0494529	-1.16509	-1.14117	-0.659047	-0.753291	1	Other
34	1.9603	1	24	-4.11	-2.61	-0.0479372	CM	1	4	0	Primary 6 or lower	0	1		1	0	0	1	0	0	2	1	1	-0.19172	-0.23646	-0.752548	0.507031	-0.0209932	-0.659961	-0.576139	-0.610913	-0.589673	1	Other	1.54106	1.52724	1.1196	1.12183	1.19779	1.64837	0.61496	2.38331	0.922687	1	Other
35	2.63107	1	0	-0.08	0.73	0.746153	CM	1	12	0	Primary 6 or lower	0	1		1	1	0	1	0	0	2	1	1	1.13076	1.55753	0.1588	1.40506	0.265925	-0.025125	0.187841	-0.678029	0.383221	5	Mother
35	2.63107	1	6	-0.08	0.73	0.746153	CM	1	12	0	Primary 6 or lower	0	1		1	1	0	1	0	0	2	1	1	-1.41336	-1.71186	-0.915475	-0.335328	-1.02581	-0.0696737	-0.151789	0.245628	1.6686	1	Mother
35	2.63107	1	12	-0.08	0.73	0.746153	CM	1	12	0	Primary 6 or lower	0	1		1	1	0	1	0	0	2	1	1	-1.10063	-0.958494	-0.815212	-0.348573	-1.01042	-0.948773	-0.903949	-0.627184	-0.64498	1	Mother
35	2.63107	1	24	-0.08	0.73	0.746153	CM	1	12	0	Primary 6 or lower	0	1		1	1	0	1	0	0	2	1	1	-0.485598	-0.804862	0.538963	0.0590169	-0.982118	0.0345357	-0.200987	0.768946	-0.482284	1	Mother
36	3.07734	2	0	0.2	1.43	0.152497	CM	1	7	0	Primary 7	0	1		1	0	2	1	0	0	2	0	1	1.94005	2.68741	1.2736	0.235896	1.23861	2.08693	2.05841	1.17682	1.42422	5	Mother
36	3.07734	2	6	0.2	1.43	0.152497	CM	1	7	0	Primary 7	0	1		1	0	2	1	0	0	2	0	1	0.270532	0.765464	-0.961114	0.222031	0.60152	1.45103	1.58755	0.305226	0.916337	1	Mother
36	3.07734	2	12	0.2	1.43	0.152497	CM	1	7	0	Primary 7	0	1		1	0	2	1	0	0	2	0	1	0.206989	0.173995	0.30272	-0.654269	0.61595	2.004	1.9405	1.22848	1.59982	1	Mother
36	3.07734	2	24	0.2	1.43	0.152497	CM	1	7	0	Primary 7	0	1		1	0	2	1	0	0	2	0	1	0.453485	-0.337394	0.882747	0.184504	0.645132	1.67458	1.39917	1.72725	1.76758	1	Mother	3.33244	2.68177	3.16751	2.97447	2.99777	3.16318	2.48346	2.69437	2.33346	1	Mother
39	2.81725	1	0	-3.6	-0.71	0.481456	CM	1	9	0	Primary 6 or lower	0	1		1	0	1	1	1	0	2	1	1	-1.0798	-1.42701	-0.195636	-0.327395	-1.03503	-0.95518	-1.03257	-0.219387	0.414562	5	Other
39	2.81725	1	6	-3.6	-0.71	0.481456	CM	1	9	0	Primary 6 or lower	0	1		1	0	1	1	1	0	2	1	1	0.363432	0.348916	-0.853855	1.3843	0.290056	0.338066	0.31395	0.261627	-0.679087	1	Other
39	2.81725	1	12	-3.6	-0.71	0.481456	CM	1	9	0	Primary 6 or lower	0	1		1	0	1	1	1	0	2	1	1	0.170092	-0.249951	-0.768736	0.50917	0.956326	1.0038	1.35361	-0.615116	-0.603961	1	Other
39	2.81725	1	24	-3.6	-0.71	0.481456	CM	1	9	0	Primary 6 or lower	0	1		1	0	1	1	1	0	2	1	1	0.543022	-0.0884854	0.204893	0.483577	0.986068	0.797005	0.953978	-0.11539	-0.432968	1	Mother	0.190783	-0.112358	0.0281874	0.689775	-0.249563	1.14063	0.263685	-0.164525	-0.0604183	1	Mother
40	2.423	1	0	-0.44	-1.71		SMA	2			Not known	0	1		0	1	0	0	0	0	0	1	1	0.112564	-0.150065	-0.270833	0.546421	0.259832	0.0633939	0.0172328	0.21051	-0.852845	5
40	2.423	1	6	-0.44	-1.71		SMA	2			Not known	0	1		0	1	0	0	0	0	0	1	1
40	2.423	1	12	-0.44	-1.71		SMA	2			Not known	0	1		0	1	0	0	0	0	0	1	1
40	2.423	1	24	-0.44	-1.71		SMA	2			Not known	0	1		0	1	0	0	0	0	0	1	1
42	2.83094	2	0	-0.13	0.67	-1.2346		3	6	1	Primary 6 or lower		1	1										-0.944048	-0.700801	-0.333183	-1.48566	-0.401613	-0.225297	-0.338336	0.26577	-1.01934	3	Mother
42	2.83094	2	6	-0.13	0.67	-1.2346		3	6	1	Primary 6 or lower		1	1										1.96796	1.38392	-0.242842	2.82182	1.89847	1.28279	0.84428	2.08692	3.86455	1	Mother
42	2.83094	2	12	-0.13	0.67	-1.2346		3	6	1	Primary 6 or lower		1	1										1.40944	1.12909	0.633135	0.217478	1.91322	1.5979	1.06014	2.56129	0.946756	2	Mother
42	2.83094	2	24	-0.13	0.67	-1.2346		3	6	1	Primary 6 or lower		1	1										1.78036	1.28795	2.38352	0.192299	1.28928	2.22689	1.90689	2.16135	-0.686574	7	Mother	2.82487	2.91677	2.83907	1.46748	3.12477	0.879844	1.76211	1.00881	3.52057	1	Mother
43	5.82615	2	0	0.97	-0.51	-0.887823	CM	1	7	1	Primary 7	0	1		0	1	1	1	0	0	2	0	0	-0.0798075	0.445136	-0.541786	0.166637	-0.313909	-1.09298	-0.990124	-0.934163	-0.51512	5	Mother
43	5.82615	2	6	0.97	-0.51	-0.887823	CM	1	7	1	Primary 7	0	1		0	1	1	1	0	0	2	0	0																							-0.791833	-0.90209	-0.491543	-0.388288
43	5.82615	2	12	0.97	-0.51	-0.887823	CM	1	7	1	Primary 7	0	1		0	1	1	1	0	0	2	0	0																							-0.782546	-0.593942	-0.898459	-0.366379
43	5.82615	2	24	0.97	-0.51	-0.887823	CM	1	7	1	Primary 7	0	1		0	1	1	1	0	0	2	0	0																							-0.286561	0.334256	-0.433781	-0.68742
44	2.21766	1	0	-0.95	-1.44	-1.37142	SMA	2	11	0	Secondary or higher	1	1		1	1	0	0	0	0	0	1	1	-1.02937	-1.18742	0.469893	-1.17617	-1.05259	1.11032	0.957179	1.09919	1.51466	3	Mother
44	2.21766	1	6	-0.95	-1.44	-1.37142	SMA	2	11	0	Secondary or higher	1	1		1	1	0	0	0	0	0	1	1
44	2.21766	1	12	-0.95	-1.44	-1.37142	SMA	2	11	0	Secondary or higher	1	1		1	1	0	0	0	0	0	1	1
44	2.21766	1	24	-0.95	-1.44	-1.37142	SMA	2	11	0	Secondary or higher	1	1		1	1	0	0	0	0	0	1	1
45	4.04381	1	0	-2.75	-0.41	1.53959		3	8	1	Primary 6 or lower		0	1										0.559819	1.4472	0.0383102	0.505583	-0.345911	-1.25008	-0.983642	-1.50691	-0.579994	2	Other
45	4.04381	1	6	-2.75	-0.41	1.53959		3	8	1	Primary 6 or lower		0	1										0.747124	1.52902	0.136484	1.78844	-0.984042	-0.334576	-0.211042	-0.582575	0.707692	5	Other
45	4.04381	1	12	-2.75	-0.41	1.53959		3	8	1	Primary 6 or lower		0	1										0.307307	-0.0723823	-0.555678	2.64073	-0.643973	-0.984038	-0.695723	-1.45864	0.184604	1	Other
45	4.04381	1	24	-2.75	-0.41	1.53959		3	8	1	Primary 6 or lower		0	1																																2.10424	2.36681	1.61611	0.684433
46	1.7796	2	0	-5.13	-4.04	-0.0479372	SMA	2	13	0	Primary 6 or lower	0	1		1	0	1	0	0	0	1	1	1	1.03616	-0.198117	1.80597	1.13248	0.547407	0.0959032	0.0558484	0.213703	1.20575	4	Mother
46	1.7796	2	6	-5.13	-4.04	-0.0479372	SMA	2	13	0	Primary 6 or lower	0	1		1	0	1	0	0	0	1	1	1	-0.267171	-0.118472	-0.0481999	0.25597	-0.744329	-0.786894	-0.977616	0.238516	-1.11198	5	Mother
46	1.7796	2	12	-5.13	-4.04	-0.0479372	SMA	2	13	0	Primary 6 or lower	0	1		1	0	1	0	0	0	1	1	1	-0.950438	-0.70907	-0.733051	-0.620467	-0.729738	-0.951604	-0.62383	-1.5345	-1.0281	1	Mother
46	1.7796	2	24	-5.13	-4.04	-0.0479372	SMA	2	13	0	Primary 6 or lower	0	1		1	0	1	0	0	0	1	1	1	-1.07584	-1.22002	-0.542447	-0.645646	-0.700477	-1.16086	-1.16474	-0.586161	0.341167	1	Mother
50	4.1013	2	0	-0.01	-0.62	-0.54105	CM	1	9	0	Primary 6 or lower	0	1		1	0	11	1	0	0	2	1	1	1.81767	2.85018	-0.0908814	1.07398	1.26859	0.923375	1.24373	-0.570162	2.79763	5	Mother
50	4.1013	2	6	-0.01	-0.62	-0.54105	CM	1	9	0	Primary 6 or lower	0	1		1	0	11	1	0	0	2	1	1	-0.10505	-1.08772	-0.773644	1.06115	0.630301	0.640559	0.489059	0.803325	0.48128	1	Mother
50	4.1013	2	12	-0.01	-0.62	-0.54105	CM	1	9	0	Primary 6 or lower	0	1		1	0	11	1	0	0	2	1	1	-0.292	-0.338699	-0.288657	0.616652	-0.661515	-1.3204	-1.37743	-0.520265	-0.635875	1	Mother
50	4.1013	2	24	-0.01	-0.62	-0.54105	CM	1	9	0	Primary 6 or lower	0	1		1	0	11	1	0	0	2	1	1																							-0.163708	-0.272585	-1.35001	1.08395
51	1.96304	1	0	-0.73	-1.09	0.481456	SMA	2	6	0	Secondary or higher	1	1		1	1	0	0	0	0	1	1	1	0.180143	1.11643	-0.748509	-0.305872	0.246364	-0.125393	0.0856135	-0.711113	-0.930275	5	Mother
51	1.96304	1	6	-0.73	-1.09	0.481456	SMA	2	6	0	Secondary or higher	1	1		1	1	0	0	0	0	1	1	1	0.371148	0.19833	-0.254645	0.544282	0.588919	0.555132	0.585289	0.214714	1.56352	1	Mother
51	1.96304	1	12	-0.73	-1.09	0.481456	SMA	2	6	0	Secondary or higher	1	1		1	1	0	0	0	0	1	1	1	0.307941	1.61672	-0.940018	-1.19597	0.930031	-0.807486	-0.449014	-1.55843	-0.755135	1	Mother
51	1.96304	1	24	-0.73	-1.09	0.481456	SMA	2	6	0	Secondary or higher	1	1		1	1	0	0	0	0	1	1	1	-1.06364	-0.91062	-0.75777	-0.356161	-1.0016	-0.54432	-0.580329	-0.162846	-0.594282	1	Other	-1.17784	-0.237308	-1.69856	-1.93651	-0.944098	-1.35872	-2.11903	0.156121	-0.374954	1	Other
52	4.19986	2	0	-0.65	-1.28	1.19282	CM	1	15	0	Secondary or higher	0	1		1	0	1	1	1	0	2	1	1	0.713059	-0.148288	0.70781	0.207613	1.27148	-0.977829	-0.683921	-1.46413	-0.788893	3	Mother
52	4.19986	2	6	-0.65	-1.28	1.19282	CM	1	15	0	Secondary or higher	0	1		1	0	1	1	1	0	2	1	1	0.899692	0.937375	0.0250475	0.194782	1.28639	-0.182896	-0.050926	-0.540061	1.69891	1	Mother
52	4.19986	2	12	-0.65	-1.28	1.19282	CM	1	15	0	Secondary or higher	0	1		1	0	1	1	1	0	2	1	1	0.711733	0.345471	-0.66137	0.182434	1.95394	1.08816	1.68927	-1.41464	0.580372	1	Mother
52	4.19986	2	24	-0.65	-1.28	1.19282	CM	1	15	0	Secondary or higher	0	1		1	0	1	1	1	0	2	1	1																							-0.634081	-0.275078	-0.492528	-0.760499
53	6.16564	1	0	-1.74	-1.63	-1.73367	CM	1	8	1	Primary 6 or lower	0	1		1	0	0	1	0	0	2	0	0																							-0.10845	0.798256	-0.500626	-0.79216
53	6.16564	1	6	-1.74	-1.63	-1.73367	CM	1	8	1	Primary 6 or lower	0	1		1	0	0	1	0	0	2	0	0																							0.376921	1.10569	0.368451	-0.767257
53	6.16564	1	12	-1.74	-1.63	-1.73367	CM	1	8	1	Primary 6 or lower	0	1		1	0	0	1	0	0	2	0	0																							2.91976	3.92004	1.66195	0.741454
53	6.16564	1	24	-1.74	-1.63	-1.73367	CM	1	8	1	Primary 6 or lower	0	1		1	0	0	1	0	0	2	0	0																							1.3607	3.5934	-0.415843	-0.686693
54	3.89322	2	0	-2.94	-2.84	-1.40798	SMA	2	4	0	Not known	0	1		1	1	0	0	0	0	1	1	1	0.551313	0.80768	2.20911	-1.51243	-0.0439066	-0.305354	-0.175778	-0.580467	0.961044	2	Mother
54	3.89322	2	6	-2.94	-2.84	-1.40798	SMA	2	4	0	Not known	0	1		1	1	0	0	0	0	1	1	1	-0.625918	-0.784584	0.358073	0.202301	-1.33516	-1.42519	-1.20673	-1.45368	-0.152885	5	Mother
54	3.89322	2	12	-2.94	-2.84	-1.40798	SMA	2	4	0	Not known	0	1		1	1	0	0	0	0	1	1	1
54	3.89322	2	24	-2.94	-2.84	-1.40798	SMA	2	4	0	Not known	0	1		1	1	0	0	0	0	1	1	1
56	1.79055	1	0	-1.38	-0.88	-0.312634	SMA	2	14	0	Primary 7	0	0		0	0	0	0	0	0	0	1	1	1.89607	1.42392	1.16832	2.29012	0.894516	0.926467	0.47552	1.97688	2.04328	2	Mother
56	1.79055	1	6	-1.38	-0.88	-0.312634	SMA	2	14	0	Primary 7	0	0		0	0	0	0	0	0	0	1	1	3.45161	2.84971	1.66166	0.980638	4.1764	1.00783	0.558475	2.00373	-0.868054	5	Mother
56	1.79055	1	12	-1.38	-0.88	-0.312634	SMA	2	14	0	Primary 7	0	0		0	0	0	0	0	0	0	1	1	0.781726	0.917754	2.14456	-1.19135	0.271457	-0.35602	-0.199551	-0.668674	0.415023	1	Mother
56	1.79055	1	24	-1.38	-0.88	-0.312634	SMA	2	14	0	Primary 7	0	0		0	0	0	0	0	0	0	1	1	1.40147	1.41238	0.776426	0.511101	1.28068	-1.6422	-1.71099	-0.618913	-0.616866	1	Other
57	2.67214	1	0	-3.85	-0.6	0.746153	SMA	2	7	0	Secondary or higher	0	0		1	1	0	0	1		1	1	1	3.12107	2.56877	2.50631	1.40403	2.55334	2.37604	2.55316	0.672271	4.59377	2	Other
57	2.67214	1	6	-3.85	-0.6	0.746153	SMA	2	7	0	Secondary or higher	0	0		1	1	0	0	1		1	1	1	1.94485	1.98253	-0.12305	2.25466	1.58893	2.93393	3.04991	1.14773	4.08174	5	Other
57	2.67214	1	12	-3.85	-0.6	0.746153	SMA	2	7	0	Secondary or higher	0	0		1	1	0	0	1		1	1	1	1.76026	0.390262	-0.024354	2.24163	2.58388	1.8141	1.74142	1.17335	2.96781	1	Other
57	2.67214	1	24	-3.85	-0.6	0.746153	SMA	2	7	0	Secondary or higher	0	0		1	1	0	0	1		1	1	1	0.890373	-0.120692	0.16625	1.35256	1.30674	2.08384	2.03311	1.22284	3.13604	1	Mother
59	5.8371	1	0	0.63	-1	-0.367663	SMA	2	9	1	Primary 7	0	1		0	1	0	0	0	0	0	1	1	2.51721	1.39736	0.380353	3.05205	2.64601	-0.382169	-0.0153849	-1.4181	5	1	Mother
59	5.8371	1	6	0.63	-1	-0.367663	SMA	2	9	1	Primary 7	0	1		0	1	0	0	0	0	0	1	1																							2.58563	0.482953	1.20405	4.4098
59	5.8371	1	12	0.63	-1	-0.367663	SMA	2	9	1	Primary 7	0	1		0	1	0	0	0	0	0	1	1																							1.32966	0.477222	-0.474699	2.94995
59	5.8371	1	24	0.63	-1	-0.367663	SMA	2	9	1	Primary 7	0	1		0	1	0	0	0	0	0	1	1																							-1.18168	-1.41472	-0.434878	-0.710372
62	4.58042	2	0	-0.61	0.79	2.05975	SMA	2	7	1	Primary 6 or lower	0	0		0	0	0	0	0	0	0	1	1	0.511648	1.58673	0.39045	0.198024	-0.676987	0.516289	0.623217	-0.0970114	-0.724828	2	Mother
62	4.58042	2	6	-0.61	0.79	2.05975	SMA	2	7	1	Primary 6 or lower	0	0		0	0	0	0	0	0	0	1	1
62	4.58042	2	12	-0.61	0.79	2.05975	SMA	2	7	1	Primary 6 or lower	0	0		0	0	0	0	0	0	0	1	1	-1.05126	-0.867061	-0.508887	-0.26965	-1.28866	-1.30659	-1.24126	-0.925621	-0.486084	1	Mother
62	4.58042	2	24	-0.61	0.79	2.05975	SMA	2	7	1	Primary 6 or lower	0	0		0	0	0	0	0	0	0	1	1																							0.484087	-0.280841	-0.0485259	1.48964
63	2.55168	1	0	-5.03	-4.13	-0.577331	SMA	2	9	0	Primary 6 or lower	0	0		1	0	0	0	1	0	0	1	1	2.85812	1.87981	2.48333	0.543178	3.20301	1.04071	1.14706	0.216883	-0.230664	2	Other
63	2.55168	1	6	-5.03	-4.13	-0.577331	SMA	2	9	0	Primary 6 or lower	0	0		1	0	0	0	1	0	0	1	1	0.588722	0.319321	-0.889365	0.525105	1.59101	0.429872	0.701761	-0.646437	-0.710428	2	Other
63	2.55168	1	12	-5.03	-4.13	-0.577331	SMA	2	9	0	Primary 6 or lower	0	0		1	0	0	0	1	0	0	1	1	1.76564	2.07175	2.32368	-0.351126	0.952157	-0.454569	-0.33338	-0.622167	0.57311	2	Other
63	2.55168	1	24	-5.03	-4.13	-0.577331	SMA	2	9	0	Primary 6 or lower	0	0		1	0	0	0	1	0	0	1	1	0.0271986	0.890984	-0.605287	0.0556367	-0.324987	-0.424328	-0.319224	-0.572677	0.741338	1	Other
64	1.9384	1	0	-0.36	-0.29	-0.312634	SMA	2	15	0	Primary 6 or lower	0	1		1	0	0	0	1	0	0	1	1	0.673434	-0.227099	-0.363263	0.558631	1.87865	-1.32659	-1.30583	-0.712333	1.46765	5	Mother
64	1.9384	1	6	-0.36	-0.29	-0.312634	SMA	2	15	0	Primary 6 or lower	0	1		1	0	0	0	1	0	0	1	1	-1.00045	-0.480182	-1.04498	-0.31822	-1.04569	-1.24933	-1.22706	-0.686843	-0.847775	1	Mother
64	1.9384	1	12	-0.36	-0.29	-0.312634	SMA	2	15	0	Primary 6 or lower	0	1		1	0	0	0	1	0	0	1	1	-1.05121	-0.720208	-0.151249	-1.19714	-1.02822	-1.7585	-1.69079	-1.10671	-0.747299	1	Mother
64	1.9384	1	24	-0.36	-0.29	-0.312634	SMA	2	15	0	Primary 6 or lower	0	1		1	0	0	0	1	0	0	1	1	-0.556223	-0.896258	-0.740537	1.36933	-0.998954	-1.12951	-1.3991	0.29105	0.621965	1	Mother	-0.31355	0.615199	-1.1852	-1.14231	-0.492011	-0.238467	-1.67271	0.81943	0.460111	1	Mother
66	2.23409	1	0	-1.64	-2.27	-0.0479372	CM	1	10	0	Primary 6 or lower	0	1		1	0	10	1	0	0	2	0	1	-0.1588	0.824617	-1.08676	-0.312702	-0.0723009	0.753538	1.09846	-0.69769	1.51743	1	Mother
66	2.23409	1	6	-1.64	-2.27	-0.0479372	CM	1	10	0	Primary 6 or lower	0	1		1	0	10	1	0	0	2	0	1	0.0261515	0.233583	-0.992239	0.538695	0.268811	1.30692	1.72936	-0.673148	0.399813	1	Mother
66	2.23409	1	12	-1.64	-2.27	-0.0479372	CM	1	10	0	Primary 6 or lower	0	1		1	0	10	1	0	0	2	0	1	-0.405931	-0.353098	-0.892498	0.525519	-0.36908	0.906406	0.976781	0.251594	-0.713193	1	Mother
66	2.23409	1	24	-1.64	-2.27	-0.0479372	CM	1	10	0	Primary 6 or lower	0	1		1	0	10	1	0	0	2	0	1	-1.02799	-1.5343	0.0774755	-0.363474	-0.993101	0.816487	0.574217	1.19979	-0.545427	1	Mother
67	6.89117	1	0	-2.14	-0.19	-1.12395	CM	1	5	0	Primary 6 or lower	0	1		1	0	1	1	1	0	2	0	1																							0.0651082	-0.150405	1.22648	-0.756097
67	6.89117	1	6	-2.14	-0.19	-1.12395	CM	1	5	0	Primary 6 or lower	0	1		1	0	1	1	1	0	2	0	1
67	6.89117	1	12	-2.14	-0.19	-1.12395	CM	1	5	0	Primary 6 or lower	0	1		1	0	1	1	1	0	2	0	1
67	6.89117	1	24	-2.14	-0.19	-1.12395	CM	1	5	0	Primary 6 or lower	0	1		1	0	1	1	1	0	2	0	1
68	5.1718	1	0	0.26	-0.91	0.857652	CM	1	7	1	Not known	0	1		0	0	0	1	0	0	2	0	1
68	5.1718	1	6	0.26	-0.91	0.857652	CM	1	7	1	Not known	0	1		0	0	0	1	0	0	2	0	1	-0.106951	-0.635997	0.351632	0.464192	-0.29781	-1.36277	-1.4261	-0.526712	-0.303456	1	Mother
68	5.1718	1	12	0.26	-0.91	0.857652	CM	1	7	1	Not known	0	1		0	0	0	1	0	0	2	0	1																							0.366595	0.484766	1.19793	-0.791616
68	5.1718	1	24	0.26	-0.91	0.857652	CM	1	7	1	Not known	0	1		0	0	0	1	0	0	2	0	1																							-0.878521	-0.780492	-0.460258	-0.741944
69	2.6694	1	0	0.65	-1.26	-0.0479372	CM	1	15	0	Secondary or higher	0	1		1	1	1	1	1	1	2	1	1	-1.22204	-1.11561	-0.223835	-1.18755	-1.03936	0.220128	0.193707	0.222713	1.59071	5	Other
69	2.6694	1	6	0.65	-1.26	-0.0479372	CM	1	15	0	Secondary or higher	0	1		1	1	1	1	1	1	2	1	1	-1.03642	-1.37087	-0.908164	0.527588	-1.02469	0.295329	0.270377	0.247526	-0.72702	1	Other
69	2.6694	1	12	0.65	-1.26	-0.0479372	CM	1	15	0	Secondary or higher	0	1		1	1	1	1	1	1	2	1	1	0.265249	-0.28738	2.30592	-0.34878	-0.683576	0.249958	-0.0700907	1.17091	0.55744	2	Other
69	2.6694	1	24	0.65	-1.26	-0.0479372	CM	1	15	0	Secondary or higher	0	1		1	1	1	1	1	1	2	1	1	-0.972835	-1.46292	0.163117	-0.374787	-0.979954	-1.03212	-1.29981	0.323185	-0.46984	1	Other
70	2.61739	2	0	0.57	-0.16	0.746153	SMA	2	10	0	Primary 6 or lower	0	1		0	0	0	0	0	0	0	1	1
70	2.61739	2	6	0.57	-0.16	0.746153	SMA	2	10	0	Primary 6 or lower	0	1		0	0	0	0	0	0	0	1	1	-1.03214	0.0155755	-1.0572	-1.49304	-0.719637	-0.899826	-0.848575	-0.618567	-0.970025	1	Other
70	2.61739	2	12	0.57	-0.16	0.746153	SMA	2	10	0	Primary 6 or lower	0	1		0	0	0	0	0	0	0	1	1	-0.722776	-1.24483	0.597625	-0.641714	-0.705046	-0.106537	0.0602786	-0.59389	0.314896	1	Other
70	2.61739	2	24	0.57	-0.16	0.746153	SMA	2	10	0	Primary 6 or lower	0	1		0	0	0	0	0	0	0	1	1	-0.847845	-1.08554	0.00885919	-0.666962	-0.675705	-0.674634	-1.17405	1.25342	-0.717454	1	Other	0.818882	1.44464	0.100718	0.132163	0.299014	0.546235	-0.179726	0.631974	1.68846	1	Other
71	1.83436	2	0	-1.39	-0.41	-1.90081	SMA	2	16	0	Primary 6 or lower	0	1		1	0	0	0	1	0	1	1	1	-0.570148	-0.859221	1.03652	-1.46055	-0.430795	0.463371	0.480529	0.216415	3.61704	5	Other
71	1.83436	2	6	-1.39	-0.41	-1.90081	SMA	2	16	0	Primary 6 or lower	0	1		1	0	0	0	1	0	1	1	1	-1.24501	-1.43894	-0.805115	-0.610947	-0.740801	1.02743	1.39986	-0.654362	0.109336	1	Other
71	1.83436	2	12	-1.39	-0.41	-1.90081	SMA	2	16	0	Primary 6 or lower	0	1		1	0	0	0	1	0	1	1	1	-0.814252	-1.02831	-0.324306	-0.62295	-0.40025	0.979187	0.917688	0.717497	0.189532	1	Other
71	1.83436	2	24	-1.39	-0.41	-1.90081	SMA	2	16	0	Primary 6 or lower	0	1		1	0	0	0	1	0	1	1	1	1.42121	1.14433	1.82125	1.07895	0.283016	1.49254	1.35233	1.21776	3.96548	2	Other	2.08558	2.57842	1.73822	0.893032	1.80526	0.579075	1.07317	1.98113	2.57968	1	Other
74	2.55989	2	0	-5.06	-3.79	-0.312634	SMA	2	9	0	Primary 6 or lower	0	0		0	0	0	0	1		0	1	1	3.36544	2.60515	5	-0.614948	2.52986	0.692019	1.00786	-0.646498	3.13866	2	Mother
74	2.55989	2	6	-5.06	-3.79	-0.312634	SMA	2	9	0	Primary 6 or lower	0	0		0	0	0	0	1		0	1	1	-0.515983	0.0412533	0.533394	-1.49711	-0.714907	-0.995331	-0.962623	-0.610567	1.45924	1	Mother
74	2.55989	2	12	-5.06	-3.79	-0.312634	SMA	2	9	0	Primary 6 or lower	0	0		0	0	0	0	1		0	1	1	1.03115	2.12597	1.40363	-0.645163	-0.0478347	-0.68474	-0.612608	-0.58711	0.337941	2	Mother
74	2.55989	2	24	-5.06	-3.79	-0.312634	SMA	2	9	0	Primary 6 or lower	0	0		0	0	0	0	1		0	1	1	-0.583207	-0.394407	-0.745445	-0.670342	-0.0185734	-0.893998	-0.875986	-0.53762	-0.69487	1	Other
75	7.00068	1	0	-0.53	-0.32	-1.27638		3	9	1	Primary 6 or lower		1	1																																2.75803	3.60862	1.23086	1.10427
75	7.00068	1	6	-0.53	-0.32	-1.27638		3	9	1	Primary 6 or lower		1	1																																0.394515	0.469095	-0.44724	0.758192
75	7.00068	1	12	-0.53	-0.32	-1.27638		3	9	1	Primary 6 or lower		1	1																																3.41217	3.91016	0.846257	2.63789
75	7.00068	1	24	-0.53	-0.32	-1.27638		3	9	1	Primary 6 or lower		1	1																																0.428664	1.07665	-0.382476	0.0967842
76	4.04381	1	0	-1.33	1.09	0.152497	SMA	2	9	0	Primary 7	0	0		0	1	0	0	0	0	0	1	1	2.66917	2.78682	1.20815	2.23335	1.6137	0.905416	0.959095	0.290779	0.621044	2	Mother
76	4.04381	1	6	-1.33	1.09	0.152497	SMA	2	9	0	Primary 7	0	0		0	1	0	0	0	0	0	1	1	2.85647	2.53373	2.08621	0.924555	2.60857	2.41967	2.70306	0.31627	0.707692	5	Mother
76	4.04381	1	12	-1.33	1.09	0.152497	SMA	2	9	0	Primary 7	0	0		0	1	0	0	0	0	0	1	1	2.54511	2.2776	0.231003	1.77595	2.94969	1.8953	1.80753	1.23966	1.39163	2	Mother
76	4.04381	1	24	-1.33	1.09	0.152497	SMA	2	9	0	Primary 7	0	0		0	1	0	0	0	0	0	1	1																							3.37237	4.55923	2.04436	0.68906
77	2.2204	2	0	-1.7	-1.87	-1.63612	SMA	2	9	0	Primary 6 or lower	0	0		1	1	0	0	1	0	0	1	1	-1.14313	-0.462951	-0.83958	-1.03834	-1.07269	0.521313	0.539603	0.235533	0.078917	2
77	2.2204	2	6	-1.7	-1.87	-1.63612	SMA	2	9	0	Primary 6 or lower	0	0		1	1	0	0	1	0	0	1	1
77	2.2204	2	12	-1.7	-1.87	-1.63612	SMA	2	9	0	Primary 6 or lower	0	0		1	1	0	0	1	0	0	1	1
77	2.2204	2	24	-1.7	-1.87	-1.63612	SMA	2	9	0	Primary 6 or lower	0	0		1	1	0	0	1	0	0	1	1
78	2.40383	1	0	-0.05	-0.91	1.01085		3	8	0	Secondary or higher		1	1										-0.137949	0.516696	0.115457	0.114962	-1.04713	-1.37648	-1.37337	-0.689283	-0.856071	5	Mother
78	2.40383	1	6	-0.05	-0.91	1.01085		3	8	0	Secondary or higher		1	1										-0.571713	-0.407065	-0.957251	-0.32981	-0.0524192	-1.1803	-1.43421	0.234781	-0.770344	1	Mother
78	2.40383	1	12	-0.05	-0.91	1.01085		3	8	0	Secondary or higher		1	1										-0.510504	-0.66276	-0.0823184	-0.342365	-0.36443	-1.58451	-1.77426	-0.189964	-0.686461	1	Mother
78	2.40383	1	24	-0.05	-0.91	1.01085		3	8	0	Secondary or higher		1	1										-0.500396	-0.489108	-0.653852	0.925934	-0.985646	-1.42054	-1.46832	-0.585286	-0.502563	1	Mother	-1.68383	-1.2028	-1.67278	-1.7433	-1.43217	-1.72243	-1.5371	-0.933406	-1.16261	1	Mother
79	4.13963	2	0	-1.1	-1.84	0.49927	CM	1	8	0	Primary 6 or lower	0	0		0	1	2	1	0	0	2	1	1	2.19461	1.85156	2.64605	0.209131	1.59632	2.60563	2.35973	2.12827	1.60304	2	Mother
79	4.13963	2	6	-1.1	-1.84	0.49927	CM	1	8	0	Primary 6 or lower	0	0		0	1	2	1	0	0	2	1	1	3.49628	2.93505	0.79084	3.22023	3.24383	2.79975	2.99063	0.804545	5	5	Mother
79	4.13963	2	12	-1.1	-1.84	0.49927	CM	1	8	0	Primary 6 or lower	0	0		0	1	2	1	0	0	2	1	1	1.45251	0.675588	1.67256	1.47902	0.646655	2.76014	2.93357	0.830985	0.575302	1	Mother
79	4.13963	2	24	-1.1	-1.84	0.49927	CM	1	8	0	Primary 6 or lower	0	0		0	1	2	1	0	0	2	1	1																							2.21088	0.667204	1.19815	3.31109
81	2.29158	2	0	-1.32	0.29	-1.37142		3	12	0	Secondary or higher		0	1										-0.0176666	1.22289	1.12373	-1.47207	-1.07061	-0.785251	-0.420873	-1.55863	-1.11014	2	Mother
81	2.29158	2	6	-1.32	0.29	-1.37142		3	12	0	Secondary or higher		0	1										0.290692	0.630981	0.827255	0.243346	-0.729658	-0.352444	-0.207111	-0.635516	-1.02764	5	Mother
81	2.29158	2	12	-1.32	0.29	-1.37142		3	12	0	Secondary or higher		0	1										0.108786	0.0469111	-0.629655	0.229757	0.592541	-0.0319901	-0.124575	0.29004	-0.93684	1	Mother
81	2.29158	2	24	-1.32	0.29	-1.37142		3	12	0	Secondary or higher		0	1										1.34758	1.87942	1.11969	0.204716	0.621642	0.715928	0.443811	1.2381	-0.169016	2	Mother
82	5.48392	2	0	-0.29	-1.69	0.152497	CM	1	9	1	Not known	0	1		1	0	1	1	0	0	2	0	1	2.35974	1.39545	3.2924	1.03914	1.30908	1.1309	1.17778	0.397155	0.628306	2	Mother
82	5.48392	2	6	-0.29	-1.69	0.152497	CM	1	9	1	Not known	0	1		1	0	1	1	0	0	2	0	1																							1.4156	2.23621	1.61524	-0.779007
82	5.48392	2	12	-0.29	-1.69	0.152497	CM	1	9	1	Not known	0	1		1	0	1	1	0	0	2	0	1																							-0.314884	0.350153	-0.487495	-0.754239
82	5.48392	2	24	-0.29	-1.69	0.152497	CM	1	9	1	Not known	0	1		1	0	1	1	0	0	2	0	1																							-0.610314	-0.915138	-0.447455	0.03754
83	2.79808	1	0	-0.98	-2.09	-0.842027	SMA	2	10	0	Primary 7	0	0		1	0	0	0	0	0	0	1	1	1.02719	0.244464	1.36049	0.53697	0.924018	0.838191	1.18477	-0.669758	2.21289
83	2.79808	1	6	-0.98	-2.09	-0.842027	SMA	2	10	0	Primary 7	0	0		1	0	0	0	0	0	0	1	1
83	2.79808	1	12	-0.98	-2.09	-0.842027	SMA	2	10	0	Primary 7	0	0		1	0	0	0	0	0	0	1	1
83	2.79808	1	24	-0.98	-2.09	-0.842027	SMA	2	10	0	Primary 7	0	0		1	0	0	0	0	0	0	1	1
84	5.34155	2	0	-0.56	0.59	-0.194277		3	7	1	Not known		1	1										-0.387493	-1.30642	-0.634216	2.77049	-1.3079	-0.926219	-0.786747	-0.958162	1.20486	3	Other
84	5.34155	2	6	-0.56	0.59	-0.194277		3	7	1	Not known		1	1										-0.946009	-0.891434	-0.53813	0.166154	-1.29315	-1.68886	-1.54226	-1.38264	0.689144	1	Other
84	5.34155	2	12	-0.56	0.59	-0.194277		3	7	1	Not known		1	1																																2.84766	0.351772	1.20515	5
84	5.34155	2	24	-0.56	0.59	-0.194277		3	7	1	Not known		1	1																																1.91903	0.966707	1.24497	2.25638
86	4.38604	2	0	-0.53	-1.46	0.481456	SMA	2	10	1	Secondary or higher	0	0		0	1	0	0	0	0	1	1	1	2.22488	2.89544	0.353374	0.634863	2.25673	0.487113	0.871005	-1.00548	0.443486	2	Mother
86	4.38604	2	6	-0.53	-1.46	0.481456	SMA	2	10	1	Secondary or higher	0	0		0	1	0	0	0	0	1	1	1	0.0711576	-0.35045	2.81681	-0.677309	-1.31688	-0.972243	-0.694904	-1.42277	-0.648319	5	Mother
86	4.38604	2	12	-0.53	-1.46	0.481456	SMA	2	10	1	Secondary or higher	0	0		0	1	0	0	0	0	1	1	1	-0.323258	-0.888387	0.635363	1.02955	-1.29259	-0.96748	-0.706724	-1.38169	-0.508668	1	Mother
86	4.38604	2	24	-0.53	-1.46	0.481456	SMA	2	10	1	Secondary or higher	0	0		0	1	0	0	0	0	1	1	1																							0.0111765	0.344811	0.379613	-0.731785
88	1.96578	2	0	1.28	0.97	-1.10672	SMA	2	10	0	Secondary or higher	0	1		0	0	0	0	1	0	1	1	1	-0.0576875	-2.17795	1.45153	0.263903	0.552858	-0.834152	-0.748263	-0.675921	0.0360537	3	Mother
88	1.96578	2	6	1.28	0.97	-1.10672	SMA	2	10	0	Secondary or higher	0	1		0	0	0	0	1	0	1	1	1	0.130627	-1.42501	1.16133	1.11461	-0.0850328	-0.396414	0.0255937	-1.54887	1.32512	1	Mother
88	1.96578	2	12	1.28	0.97	-1.10672	SMA	2	10	0	Secondary or higher	0	1		0	0	0	0	1	0	1	1	1	-1.29039	-1.3371	-1.07287	-0.627089	-0.722042	-0.672655	-0.861144	0.27621	0.217186	1	Other
88	1.96578	2	24	1.28	0.97	-1.10672	SMA	2	10	0	Secondary or higher	0	1		0	0	0	0	1	0	1	1	1	-0.91477	-0.837246	-0.874951	-0.221293	-0.691658	-1.23541	-1.53496	0.327598	-0.809172	1	Mother
89	2.8063	1	0	-0.03	-2.09	-0.577331	CM	1	9	0	Primary 7	0	0		0	0	0	1	0	0	2	0	1	1.89676	2.25519	2.14195	-1.191	1.90406	0.839424	1.04726	-0.219929	-0.1878	2	Mother
89	2.8063	1	6	-0.03	-2.09	-0.577331	CM	1	9	0	Primary 7	0	0		0	0	0	1	0	0	2	0	1	-0.399877	0.324544	-0.883098	0.524277	-1.02084	1.3928	1.81692	-0.64481	0.496141	5	Mother
89	2.8063	1	12	-0.03	-2.09	-0.577331	CM	1	9	0	Primary 7	0	0		0	0	0	1	0	0	2	0	1	-0.214589	-0.600959	-0.00816577	0.511722	-0.353046	-0.0891555	-0.465862	1.17756	-0.621014	1	Mother
89	2.8063	1	24	-0.03	-2.09	-0.577331	CM	1	9	0	Primary 7	0	0		0	0	0	1	0	0	2	0	1	0.404481	1.90222	-0.207508	-1.24122	0.329418	1.37808	1.35226	0.777624	-0.452787	2	Other
93	3.81383	2	0	-1.04	-1.57	-1.75476	CM	1	6	0	Primary 6 or lower	0	0		1	0	3	1	0	0	2	0	1	1.03788	0.12525	3.75375	0.21734	-0.699434	0.281478	0.783441	-1.48324	-0.853879	2	Other
93	3.81383	2	6	-1.04	-1.57	-1.75476	CM	1	6	0	Primary 6 or lower	0	0		1	0	3	1	0	0	2	0	1	0.605123	0.877315	1.90271	-1.09152	-0.0310796	0.239394	0.723858	-1.45762	-0.76677	3	Other
93	3.81383	2	12	-1.04	-1.57	-1.75476	CM	1	6	0	Primary 6 or lower	0	0		1	0	3	1	0	0	2	0	1	0.0489611	-0.714079	2.3924	-0.672756	-0.66897	0.437633	0.38758	0.36597	0.522299	1	Other
93	3.81383	2	24	-1.04	-1.57	-1.75476	CM	1	6	0	Primary 6 or lower	0	0		1	0	3	1	0	0	2	0	1	-0.0713998	0.456017	-0.528731	0.596853	-0.638506	-0.244461	-0.147048	-0.481351	-0.503598	1	Other
96	2.9076	1	0	0.24	-2.38	-0.577331		3	9	0	Primary 6 or lower		1	1										-1.0687	-0.74284	-0.958295	-0.329672	-1.03238	-1.06137	-1.29628	0.23451	-0.771266	1	Other
96	2.9076	1	6	0.24	-2.38	-0.577331		3	9	0	Primary 6 or lower		1	1										-0.138602	1.01133	-0.0828407	-1.20618	-0.36451	-1.46517	-1.77468	0.259322	-0.686922	1	Other
96	2.9076	1	12	0.24	-2.38	-0.577331		3	9	0	Primary 6 or lower		1	1										-0.94595	-0.918889	0.402146	-1.21873	-1.00312	-1.15088	-1.28212	-0.165423	-0.603039	1	Other
96	2.9076	1	24	0.24	-2.38	-0.577331		3	9	0	Primary 6 or lower		1	1										-0.697772	-0.758294	-0.574999	-1.24419	0.332866	-1.23874	-1.54383	0.334032	-0.432968	1	Mother	0.467132	0.472407	0.639216	-0.0723832	1.03098	-0.222089	0.0540073	1.10304	0.100664	1	Mother
97	1.97125	1	0	1.31	-0.32	1.01085	CM	1	9	0	Secondary or higher	0	1		1	1	0	1	1	0	2	1	1	0.429311	0.447932	0.0329492	0.557803	0.246604	0.11534	0.641938	-1.60955	1.47318	5	Mother
97	1.97125	1	6	1.31	-0.32	1.01085	CM	1	9	0	Secondary or higher	0	1		1	1	0	1	1	0	2	1	1	0.86343	0.193108	1.29887	-0.318772	1.24116	0.310701	0.857795	-1.5846	2.15851	1	Mother
97	1.97125	1	12	1.31	-0.32	1.01085	CM	1	9	0	Secondary or higher	0	1		1	1	0	1	1	0	2	1	1	0.304242	-0.732395	1.00397	-0.331327	0.929149	1.82249	1.76665	1.13661	1.04135	1	Mother
97	1.97125	1	24	1.31	-0.32	1.01085	CM	1	9	0	Secondary or higher	0	1		1	1	0	1	1	0	2	1	1	1.17147	1.10098	0.804625	-0.356506	1.61161	1.97248	1.7808	1.63552	1.8101	2	Mother	1.86734	2.22383	1.72691	1.11698	1.19397	0.2811	1.65927	1.11127	2.52901	1	Mother
98	2.8063	2	0	-1.44	-1.19	1.80494		3	10	0	Secondary or higher		1	1										-0.0785197	0.634898	-0.337883	-0.189216	-0.402335	-0.348746	-0.20334	-0.634295	0.177549	2	Other
98	2.8063	2	6	-1.44	-1.19	1.80494		3	10	0	Secondary or higher		1	1										-0.991113	-1.27094	1.34618	-1.50146	-1.36306	-1.08919	-1.07499	-0.602025	-0.913796	1	Other
98	2.8063	2	12	-1.44	-1.19	1.80494		3	10	0	Secondary or higher		1	1										-0.771521	-1.14734	0.324652	0.206716	-1.34029	-1.21199	-1.51108	0.335327	-0.782901	1	Other
98	2.8063	2	24	-1.44	-1.19	1.80494		3	10	0	Secondary or higher		1	1										-1.26076	-1.64742	-0.641527	-0.68407	-0.655823	-0.931972	-0.931379	-0.510638	-0.603151	1	Mother	-0.574373	0.0615741	-0.814704	-1.53245	0.275265	-1.13554	-1.65455	0.536963	-0.182734	1	Mother
100	4.36961	1	0	-0.44	-0.71	-1.58137	SMA	2	9	0	Primary 6 or lower	0	1		0	1	0	0	0	0	0	1	1	1.4684	1.16409	1.66024	1.7932	-0.00976961	-1.32093	-1.07255	-1.49077	-0.525147	1	Mother
100	4.36961	1	6	-0.44	-0.71	-1.58137	SMA	2	9	0	Primary 6 or lower	0	1		0	1	0	0	0	0	0	1	1	-0.207171	-0.0958841	0.196015	-0.379133	-0.3217	-1.24573	-1.27342	-0.567118	-0.440803	1	Mother
100	4.36961	1	12	-0.44	-0.71	-1.58137	SMA	2	9	0	Primary 6 or lower	0	1		0	1	0	0	0	0	0	1	1	-0.890439	-0.686482	0.291056	-1.25557	-0.960313	-1.05119	-1.0584	-0.54244	-0.35692	1	Other
100	4.36961	1	24	-0.44	-0.71	-1.58137	SMA	2	9	0	Primary 6 or lower	0	1		0	1	0	0	0	0	0	1	1																							-0.578765	0.48237	-1.34115	-0.781546
104	3.1896	1	0	-2.56	-3.62	-0.577331	SMA	2	8	0	Primary 6 or lower	0	0		0	0	0	0	0	0	0	1	1	1.44752	2.31612	0.655275	-0.768718	1.58869	1.37595	1.52221	0.248475	2.2788	2	Mother
104	3.1896	1	6	-2.56	-3.62	-0.577331	SMA	2	8	0	Primary 6 or lower	0	0		0	0	0	0	0	0	0	1	1	0.890691	0.054052	-0.0259206	2.67377	0.297431	1.09437	0.907562	1.17295	1.76539	5	Mother
104	3.1896	1	12	-2.56	-3.62	-0.577331	SMA	2	8	0	Primary 6 or lower	0	0		0	0	0	0	0	0	0	1	1
104	3.1896	1	24	-2.56	-3.62	-0.577331	SMA	2	8	0	Primary 6 or lower	0	0		0	0	0	0	0	0	0	1	1	0.576317	0.289505	-0.523301	0.908689	0.994005	0.957437	0.856689	0.796878	-0.387339	2	Mother
105	1.78234	2	0	-2.22	-1.18	-0.577331	CM	1	5	0	Primary 6 or lower	0	0		1	0	0	1	1	0	2	0	0	1.53281	2.14665	1.0266	0.268525	0.874088	0.934563	1.02764	0.213839	3.60829	2	Mother
105	1.78234	2	6	-2.22	-1.18	-0.577331	CM	1	5	0	Primary 6 or lower	0	0		1	0	0	1	1	0	2	0	0	-0.512303	-0.114555	-0.433446	-0.608533	-0.417006	-0.304197	-0.141244	-0.659108	0.0932048	5	Mother
105	1.78234	2	12	-2.22	-1.18	-0.577331	CM	1	5	0	Primary 6 or lower	0	0		1	0	0	1	1	0	2	0	0	0.919496	0.641862	1.23026	0.673563	0.252151	1.57383	2.02363	-0.632126	1.38596	1	Mother
105	1.78234	2	24	-2.22	-1.18	-0.577331	CM	1	5	0	Primary 6 or lower	0	0		1	0	0	1	1	0	2	0	0	0.173694	-0.5389	2.5907	-0.647439	-0.698392	2.08307	2.03779	1.21505	-0.847887	1	Mother
106	3.08282	2	0	0.67	-1.5	0.21676	CM	1	11	0	Primary 6 or lower	0	0		1	0	1	1	0	0	2	0	1	-0.913108	-0.660761	-0.675087	0.235758	-1.37404	-0.666491	-0.577325	-0.620601	2.02566	2	Other
106	3.08282	2	6	0.67	-1.5	0.21676	CM	1	11	0	Primary 6 or lower	0	0		1	0	1	1	0	0	2	0	1	-0.716722	-0.567189	-0.562813	0.220927	-1.0302	-1.05714	-1.04232	-0.591449	-0.877846	5	Other
106	3.08282	2	12	0.67	-1.5	0.21676	CM	1	11	0	Primary 6 or lower	0	0		1	0	1	1	0	0	2	0	1	-0.530761	0.182699	-0.856674	-0.655648	-0.362251	0.455471	0.699977	-0.566501	-0.793041	1	Other
106	3.08282	2	24	0.67	-1.5	0.21676	CM	1	11	0	Primary 6 or lower	0	0		1	0	1	1	0	0	2	0	1	-1.26883	-0.318244	-0.654059	-1.5463	-1.31095	-1.42083	-1.4965	-0.513892	-0.614213	1	Other
108	3.93703	1	0	0.6	-1.35	1.71298	CM	1	8	0	Secondary or higher	0	1		1	1	2	1	0	0	2	0	0	0.670782	0.0906105	0.797836	0.0763317	0.957368	0.41039	0.665222	-0.613353	-0.597969	2	Mother
108	3.93703	1	6	0.6	-1.35	1.71298	CM	1	8	0	Secondary or higher	0	1		1	1	2	1	0	0	2	0	0	1.35239	1.50944	0.112985	0.927659	1.29856	0.84443	0.602706	1.20901	-0.514086	5	Mother
108	3.93703	1	12	0.6	-1.35	1.71298	CM	1	8	0	Secondary or higher	0	1		1	1	2	1	0	0	2	0	0	-0.943576	-0.755247	-0.571344	-0.380788	-0.972979	-1.23587	-1.26336	-0.563863	-0.429742	1	Mother
108	3.93703	1	24	0.6	-1.35	1.71298	CM	1	8	0	Secondary or higher	0	1		1	1	2	1	0	0	2	0	0	0.792209	0.0734159	0.399152	0.889856	1.01589	0.470873	0.693533	-0.514373	0.939523	1	Mother
109	7.00068	1	0	-2.88	-2.22	0.552791	SMA	2	18	1	Secondary or higher	0	1		0	1	0	0	0	0	0	1	1																							1.01704	1.4151	0.381798	0.362303
109	7.00068	1	6	-2.88	-2.22	0.552791	SMA	2	18	1	Secondary or higher	0	1		0	1	0	0	0	0	0	1	1																							3.08501	1.7226	1.25066	4.09679
109	7.00068	1	12	-2.88	-2.22	0.552791	SMA	2	18	1	Secondary or higher	0	1		0	1	0	0	0	0	0	1	1																							-0.544615	-0.790238	-0.427329	0.0409888
109	7.00068	1	24	-2.88	-2.22	0.552791	SMA	2	18	1	Secondary or higher	0	1		0	1	0	0	0	0	0	1	1																							0.426703	-0.175692	0.0383333	1.20511
111	7.95619	1	0	-1.19	-1.64	-1.73367	CM	1	9	1	Primary 7	0	1		0	0	0	1	1	0	2	1	1																							0.878905	-0.163	2.11809	0.409797
111	7.95619	1	6	-1.19	-1.64	-1.73367	CM	1	9	1	Primary 7	0	1		0	0	0	1	1	0	2	1	1																							0.573091	-0.169022	2.56297	-0.677848
111	7.95619	1	12	-1.19	-1.64	-1.73367	CM	1	9	1	Primary 7	0	1		0	0	0	1	1	0	2	1	1																							-0.366039	-0.801635	0.884765	-0.65308
111	7.95619	1	24	-1.19	-1.64	-1.73367	CM	1	9	1	Primary 7	0	1		0	0	0	1	1	0	2	1	1																							-0.185559	-0.18738	0.502355	-0.600687
113	2.07529	2	0	-0.51	0.02	-0.577331	SMA	2	10	0	Secondary or higher	0	1		0	0	0	0	0	0	0	1	1	1.81696	1.1885	2.64226	0.261144	1.20927	0.379784	0.656165	-0.670498	-1.14655	4	Other
113	2.07529	2	6	-0.51	0.02	-0.577331	SMA	2	10	0	Secondary or higher	0	1		0	0	0	0	0	0	0	1	1	-1.59572	-2.08089	-0.381748	-1.47924	-0.73567	-1.10176	-0.793601	-1.54453	-1.0622	3	Other
113	2.07529	2	12	-0.51	0.02	-0.577331	SMA	2	10	0	Secondary or higher	0	1		0	0	0	0	0	0	0	1	1	0.450756	1.34736	0.493185	-0.627917	-0.0678768	-0.907223	-0.578582	-1.51985	-0.978321	1	Other
113	2.07529	2	24	-0.51	0.02	-0.577331	SMA	2	10	0	Secondary or higher	0	1		0	0	0	0	0	0	0	1	1	1.31799	0.836404	2.24357	0.210786	0.614587	-0.757232	-0.703194	-0.571518	-0.810094	1	Mother
115	2.31622	2	0	-0.42	-1.99	1.54024	CM	1	9	0	Secondary or higher	0	1		1	0	0	1	0	0	2	0	1	0.10944	-0.112814	-0.431357	-0.608809	1.21632	-1.1408	-1.52724	0.689701	-1.10599	4	Mother
115	2.31622	2	6	-0.42	-1.99	1.54024	CM	1	9	0	Secondary or higher	0	1		1	0	0	1	0	0	2	0	1	-0.573492	-1.37279	-1.11569	1.97021	-0.728616	0.850396	1.32477	-1.08318	-1.02165	5	Mother
115	2.31622	2	12	-0.42	-1.99	1.54024	CM	1	9	0	Secondary or higher	0	1		1	0	0	1	0	0	2	0	1	-0.885531	-0.959977	-1.02221	1.09398	-1.36747	-1.95004	-1.79187	-1.50833	-0.939145	1	Mother
115	2.31622	2	24	-0.42	-1.99	1.54024	CM	1	9	0	Secondary or higher	0	1		1	0	0	1	0	0	2	0	1	-0.638698	-1.13603	-0.831608	0.204923	-0.0318011	0.235696	0.442554	-0.559993	-0.770918	1	Mother
116	2.27242	2	0	-0.24	-1.1	0.481456	CM	1	12	0	Primary 6 or lower	0	0		1	0	2	1			2	1	1	1.09669	-0.119778	2.67985	-0.175764	0.888438	-0.907877	-0.840106	-0.660735	-0.512845	2	Other
116	2.27242	2	6	-0.24	-1.1	0.481456	CM	1	12	0	Primary 6 or lower	0	0		1	0	2	1			2	1	1	-0.70228	-1.04397	-0.343105	-0.620467	-0.0765351	-1.6701	-1.73397	-0.635651	-1.0281	3	Other
116	2.27242	2	12	-0.24	-1.1	0.481456	CM	1	12	0	Primary 6 or lower	0	0		1	0	2	1			2	1	1	-0.254035	0.728905	-1.00498	0.227825	-0.71162	-1.57723	-1.36175	-1.50385	-0.923935	1	Other
116	2.27242	2	24	-0.24	-1.1	0.481456	CM	1	12	0	Primary 6 or lower	0	0		1	0	2	1			2	1	1	-0.118502	0.904298	-0.794532	-0.663857	-0.0261091	-1.89062	-1.74797	-1.44921	-0.738194	1	Other
117	8.64613	1	0	-1.13	-0.3	1.77224	CM	1	9	1	Secondary or higher	0	0		0	0	1	1	0	0	2	0	0																							1.05171	0.768922	0.0230175	1.55705
117	8.64613	1	6	-1.13	-0.3	1.77224	CM	1	9	1	Secondary or higher	0	0		0	0	1	1	0	0	2	0	0																							1.53726	1.07626	1.74148	0.840389
117	8.64613	1	12	-1.13	-0.3	1.77224	CM	1	9	1	Secondary or higher	0	0		0	0	1	1	0	0	2	0	0																							0.758532	-0.184272	1.34091	0.870191
117	8.64613	1	24	-1.13	-0.3	1.77224	CM	1	9	1	Secondary or higher	0	0		0	0	1	1	0	0	2	0	0																							-0.0118275	-0.822778	0.531674	0.548741
118	5.94661	1	0	-0.56	0.67	0.152497	SMA	2	8	1	Primary 6 or lower	0	0		1	1	0	0	0	0	0	1	1																							0.994835	1.11421	1.61327	-0.432062
118	5.94661	1	6	-0.56	0.67	0.152497	SMA	2	8	1	Primary 6 or lower	0	0		1	1	0	0	0	0	0	1	1																							0.0556479	0.481626	0.359481	-0.778416
118	5.94661	1	12	-0.56	0.67	0.152497	SMA	2	8	1	Primary 6 or lower	0	0		1	1	0	0	0	0	0	1	1																							-0.882674	-0.778161	-0.468135	-0.751743
118	5.94661	1	24	-0.56	0.67	0.152497	SMA	2	8	1	Primary 6 or lower	0	0		1	1	0	0	0	0	0	1	1																							1.82899	2.03026	2.5435	-0.331086
119	6.13552	1	0	-1.39	-0.82	1.31494	SMA	2	10	1	Primary 6 or lower	0	1		1	1	0	0	0		1	1	1																							0.840544	1.11197	1.19629	-0.422672
119	6.13552	1	6	-1.39	-0.82	1.31494	SMA	2	10	1	Primary 6 or lower	0	1		1	1	0	0	0		1	1	1																							1.00926	1.10611	1.21609	-0.0270544
119	6.13552	1	12	-1.39	-0.82	1.31494	SMA	2	10	1	Primary 6 or lower	0	1		1	1	0	0	0		1	1	1																							-0.879386	-0.153286	-1.31096	-0.743986
119	6.13552	1	24	-1.39	-0.82	1.31494	SMA	2	10	1	Primary 6 or lower	0	1		1	1	0	0	0		1	1	1																							-1.0166	-1.41855	0.00255994	-0.694314
122	2.00137	1	0	0.59	-1.2	-1.37142		3	7	1	Secondary or higher		1	1										0.0607724	0.452719	0.0386934	0.125103	-0.405717	-0.23939	-0.602356	1.08847	-0.923823	5
122	2.00137	1	6	0.59	-1.2	-1.37142		3	7	1	Secondary or higher		1	1
122	2.00137	1	12	0.59	-1.2	-1.37142		3	7	1	Secondary or higher		1	1
122	2.00137	1	24	0.59	-1.2	-1.37142		3	7	1	Secondary or higher		1	1
123	1.71937	2	0	-0.62	-1.91	0.746153		3	9	0	Primary 7		1	0
123	1.71937	2	6	-0.62	-1.91	0.746153		3	9	0	Primary 7		1	0
123	1.71937	2	12	-0.62	-1.91	0.746153		3	9	0	Primary 7		1	0
123	1.71937	2	24	-0.62	-1.91	0.746153		3	9	0	Primary 7		1	0
125	3.70157	1	0	-2.71	-1.67	-0.194277	CM	1	6	0	Primary 6 or lower	1	1		1	0	2	1	0	0	2	1	1	0.3937	-0.281722	-0.806857	3.10585	-0.355932	0.135551	0.490424	-1.07444	2.96551	1	Mother
125	3.70157	1	6	-2.71	-1.67	-0.194277	CM	1	6	0	Primary 6 or lower	1	1		1	0	2	1	0	0	2	1	1	2.06626	2.13964	-0.714427	3.52558	1.29127	-0.510213	-0.684322	0.29783	1.84605	5	Mother
125	3.70157	1	12	-2.71	-1.67	-0.194277	CM	1	6	0	Primary 6 or lower	1	1		1	0	2	1	0	0	2	1	1	1.13651	0.211601	-0.616775	3.51268	0.653054	-0.433368	-0.328441	-0.57566	3.13327	1	Mother
125	3.70157	1	24	-2.71	-1.67	-0.194277	CM	1	6	0	Primary 6 or lower	1	1		1	0	2	1	0	0	2	1	1	2.6238	1.37473	1.13309	3.05563	2.31524	1.39271	1.48927	0.372539	2.1	7	Mother	1.87581	1.34836	1.58365	2.10874	1.24819	2.48964	1.54409	1.35713	1.1613	1	Mother
134	2.00137	1	0	-1.13	-2.97	1.01085		3	6	0	Primary 6 or lower		1	1										-1.05594	-1.89161	1.20853	-1.17072	-1.05892	-0.838139	-0.87989	-0.259793	0.277215	5	Other
134	2.00137	1	6	-1.13	-2.97	1.01085		3	6	0	Primary 6 or lower		1	1										-0.969847	-0.775481	-0.997461	-0.324498	-0.711795	-1.45144	-1.46647	-0.674504	-0.805833	1	Other
134	2.00137	1	12	-1.13	-2.97	1.01085		3	6	0	Primary 6 or lower		1	1										-0.433845	-0.389221	-0.935841	-0.332638	0.277469	-1.2832	-1.27826	-0.658505	-0.751448	1	Other
134	2.00137	1	24	-1.13	-2.97	1.01085		3	6	0	Primary 6 or lower		1	1										1.4277	-0.22819	1.2071	1.3696	1.94014	1.98234	2.06839	0.73993	-0.580916	2	Other	0.621765	0.143285	1.13373	0.886228	0.572051	0.302974	1.25952	-0.134825	0.295434	1	Other
136	4	1	0	-1.4	-1.42	-0.887823		3	10	0	Primary 7		1	1										0.430358	0.435525	0.809847	-0.357196	0.306009	1.37784	1.50746	0.28861	1.21419	1	Mother
136	4	1	6	-1.4	-1.42	-0.887823		3	10	0	Primary 7		1	1										0.620018	1.1902	-0.258162	-0.370648	0.974845	1.09872	1.17286	0.315049	-0.497494	1	Mother
136	4	1	12	-1.4	-1.42	-0.887823		3	10	0	Primary 7		1	1										0.563873	0.273402	-0.152677	0.4793	0.991039	0.463233	0.563653	-0.106984	0.196126	1	Mother
136	4	1	24	-1.4	-1.42	-0.887823		3	10	0	Primary 7		1	1																																-0.269605	-0.140206	0.342961	-0.798965
137	4.14237	1	0	-0.81	-2.04	-0.887823	SMA	2	8	0	Secondary or higher	0	1		1	1	0	0	1	0	1	1	1	1.81272	1.46287	2.39679	1.36698	0.310178	-0.157538	0.00280941	-0.603184	0.637636	1	Mother
137	4.14237	1	6	-0.81	-2.04	-0.887823	SMA	2	8	0	Secondary or higher	0	1		1	1	0	0	1	0	1	1	1	0.0110557	-0.134618	0.149539	-0.372993	0.324368	0.992945	1.04833	0.31966	1.92025	1	Mother
137	4.14237	1	12	-0.81	-2.04	-0.887823	SMA	2	8	0	Secondary or higher	0	1		1	1	0	0	1	0	1	1	1	0.694343	-0.0532326	1.41703	-0.385893	0.992562	1.06979	1.12668	0.345015	-0.395636	1	Mother
137	4.14237	1	24	-0.81	-2.04	-0.887823	SMA	2	8	0	Secondary or higher	0	1		1	1	0	0	1	0	1	1	1																							0.0488986	-0.141306	1.19574	-0.794338
139	1.81246	1	0	-1.67	-1.66	0.481456	SMA	2	8	0	Primary 7	0	1		0	0	0	0	1	0	2	1	1	-1.07915	-0.916927	-1.16718	-0.302078	-0.73785	-0.507244	-0.35373	-0.71857	-0.955625	5	Mother
139	1.81246	1	6	-1.67	-1.66	0.481456	SMA	2	8	0	Primary 7	0	1		0	0	0	0	1	0	2	1	1	-0.396533	-1.17132	-1.07057	0.980983	0.256786	-1.38922	-1.10882	-1.59233	-0.870359	1	Mother
139	1.81246	1	12	-1.67	-1.66	0.481456	SMA	2	8	0	Primary 7	0	1		0	0	0	0	1	0	2	1	1	0.0362407	0.24664	-0.976573	1.40051	-0.381987	0.00199671	-0.0620409	0.229764	-0.787397	1	Mother
139	1.81246	1	24	-1.67	-1.66	0.481456	SMA	2	8	0	Primary 7	0	1		0	0	0	0	1	0	2	1	1	-0.833641	-0.264314	-0.785969	-0.352436	-1.00593	-1.28501	-1.15802	-1.06901	-0.61917	1	Mother	-0.0748385	0.525998	-0.0278429	-0.718672	-0.131702	-1.40793	-0.0663591	0.741593	0.381926	1	Mother
141	3.43053	1	0	-0.32	-0.85	-0.02089	SMA	2	8	0	Secondary or higher	1	1		1	1	0	0	1	0	1	1	1	-0.0118325	-0.324809	0.311283	-0.342848	0.289334	0.454118	0.72648	-0.638437	-0.082716	1	Mother
141	3.43053	1	6	-0.32	-0.85	-0.02089	SMA	2	8	0	Secondary or higher	1	1		1	1	0	0	1	0	1	1	1	-0.567658	-0.911055	0.411546	-0.356092	-0.675078	-0.185482	-0.0256803	-0.612404	-0.594743	1	Mother
141	3.43053	1	12	-0.32	-0.85	-0.02089	SMA	2	8	0	Secondary or higher	1	1		1	1	0	0	1	0	1	1	1	-0.131857	-1.1637	-0.659596	0.926693	0.64648	0.610683	0.469805	0.761489	0.693404	1	Mother
141	3.43053	1	24	-0.32	-0.85	-0.02089	SMA	2	8	0	Secondary or higher	1	1		1	1	0	0	1	0	1	1	1	-0.255917	-0.668203	-0.466903	0.0373561	0.34946	0.283319	0.208102	0.362099	0.262956	1	Mother	2.84371	3.02371	2.62624	1.90696	2.25642	1.05675	2.3199	2.8727	2.70292	1	Mother
142	4.08761	1	0	-0.76	-0.93	0.152497	CM	1	9	1	Primary 6 or lower	1	1		1	0	1	1	0	0	2	1	1	-1.04783	-0.890165	-0.733226	-0.359404	-0.997831	-0.884256	-0.560638	-1.50474	0.628418	1	Other
142	4.08761	1	6	-0.76	-0.93	0.152497	CM	1	9	1	Primary 6 or lower	1	1		1	0	1	1	0	0	2	1	1	-0.861536	-1.47946	-0.246673	-0.372166	-0.329797	-0.927983	-0.89943	-0.580812	-0.487354	1	Other
142	4.08761	1	12	-0.76	-0.93	0.152497	CM	1	9	1	Primary 6 or lower	1	1		1	0	1	1	0	0	2	1	1	-0.798309	-0.727828	-0.538445	0.0468068	-0.967929	-0.371728	-0.265597	-0.555321	2.00137	1	Other
142	4.08761	1	24	-0.76	-0.93	0.152497	CM	1	9	1	Primary 6 or lower	1	1		1	0	1	1	0	0	2	1	1																							-0.584475	-0.454505	-0.502924	-0.424033
143	8.64613	1	0	-1.68	-1.73	0.552791		3	14	1	Primary 6 or lower		1	0																																0.102084	0.455561	0.0230175	-0.29788
143	8.64613	1	6	-1.68	-1.73	0.552791		3	14	1	Primary 6 or lower		1	0																																-0.0468422	0.450316	-0.383789	-0.275834
143	8.64613	1	12	-1.68	-1.73	0.552791		3	14	1	Primary 6 or lower		1	0
143	8.64613	1	24	-1.68	-1.73	0.552791		3	14	1	Primary 6 or lower		1	0																																-0.490161	-0.194083	-0.324057	-0.572517
149	2.1191	2	0	-1.87	-1.63	-0.842027	SMA	2	7	0	Primary 6 or lower	0	1		0	0	0	0	0	0	1	1	1	-0.78333	-0.813958	0.310936	-1.03578	-0.749059	0.985108	0.801635	1.12936	1.2629	1	Mother
149	2.1191	2	6	-1.87	-1.63	-0.842027	SMA	2	7	0	Primary 6 or lower	0	1		0	0	0	0	0	0	1	1	1	-0.0997072	1.27729	-0.760728	-1.48069	0.245817	-0.853634	-0.507269	-1.54168	4.95266	1	Mother
149	2.1191	2	12	-1.87	-1.63	-0.842027	SMA	2	7	0	Primary 6 or lower	0	1		0	0	0	0	0	0	1	1	1	0.950773	0.0125288	2.05871	0.235206	0.586208	0.654045	0.674929	0.279328	1.42882	1	Mother
149	2.1191	2	24	-1.87	-1.63	-0.842027	SMA	2	7	0	Primary 6 or lower	0	1		0	0	0	0	0	0	1	1	1	-0.0435243	-0.49886	-0.870773	1.07398	0.288788	0.204876	0.411131	-0.570162	0.395553	1	Mother	1.83085	0.780997	2.525	1.85212	2.5006	1.73487	1.76102	0.144199	1.03357	1	Mother
150	1.84805	1	0	-2.09	-1.71	0.746153	SMA	2	8	0	Secondary or higher	0	1		1	1	0	0	1	1	1	1	1	0.910495	0.0934428	1.95918	1.42479	-0.410206	0.336347	0.345551	0.182037	1.45244	1	Other
150	1.84805	1	6	-2.09	-1.71	0.746153	SMA	2	8	0	Secondary or higher	0	1		1	1	0	0	1	1	1	1	1	-0.517922	0.171782	-0.2865	-1.17927	-0.395776	0.649815	0.837265	-0.24298	1.5354	1	Mother
150	1.84805	1	12	-2.09	-1.71	0.746153	SMA	2	8	0	Secondary or higher	0	1		1	1	0	0	1	1	1	1	1	0.664037	0.591119	-0.185192	1.39899	0.27298	1.68753	1.47361	1.58101	-0.777258	1	Mother
150	1.84805	1	24	-2.09	-1.71	0.746153	SMA	2	8	0	Secondary or higher	0	1		1	1	0	0	1	1	1	1	1	1.03461	0.07973	0.394835	0.941939	1.60857	1.11862	1.20982	0.282101	-0.609491	1	Mother	1.99257	1.60011	1.94306	1.71522	1.80518	1.88173	1.41854	1.71106	1.36729	1	Mother
152	3.49076	2	0	0.88	-0.12	1.01943	CM	1	9	0	Secondary or higher	0	1		0	0	1	1	0	0	2	1	1	-0.242601	-0.595913	-0.987224	1.08936	-0.0556912	-1.56326	-1.3475	-1.49924	-0.908265	1	Mother
152	3.49076	2	6	0.88	-0.12	1.01943	CM	1	9	0	Secondary or higher	0	1		0	0	1	1	0	0	2	1	1	0.93465	-0.517574	0.666556	1.50889	1.26514	-0.770793	-0.439486	-1.47484	-0.825303	1	Mother
152	3.49076	2	12	0.88	-0.12	1.01943	CM	1	9	0	Secondary or higher	0	1		0	0	1	1	0	0	2	1	1	0.998548	-0.434883	0.375828	1.92772	1.28038	-0.692715	-0.637416	-0.55023	0.463305	1	Mother
152	3.49076	2	24	0.88	-0.12	1.01943	CM	1	9	0	Secondary or higher	0	1		0	0	1	1	0	0	2	1	1	-0.367651	-0.276028	-0.603406	-0.257164	0.00323245	0.654774	0.903176	-0.50074	1.23205	1	Mother	0.166821	-0.448345	0.46164	0.697868	0.331097	0.838802	0.501868	-0.665294	-0.278213	1	Mother
153	3.24162	1	0	-2.31	-1.81	0.49927		3	9	0	Secondary or higher		1	1										-0.0350379	-0.019935	-0.894587	-0.338088	0.937005	-0.0532363	0.420037	-1.54664	-0.715037	1	Mother
153	3.24162	1	6	-2.31	-1.81	0.49927		3	9	0	Secondary or higher		1	1										-0.0995904	-0.947614	-0.802157	0.513585	0.951195	-0.699	-0.893475	0.275051	-0.633458	1	Mother
153	3.24162	1	12	-2.31	-1.81	0.49927		3	9	0	Secondary or higher		1	1										-0.659451	-1.53908	-0.708161	0.0692264	0.312423	-0.864531	-1.0956	0.299457	-0.550497	1	Mother
153	3.24162	1	24	-2.31	-1.81	0.49927		3	9	0	Secondary or higher		1	1										1.44857	1.96881	1.43217	0.90793	0.0150826	0.00395882	-0.110071	0.348947	-0.38227	2	Mother	-1.18403	-0.935199	-1.35648	-1.10882	-1.01913	-0.666919	-1.32388	-0.699894	-0.928054	1	Mother
155	1.8152	2	0	-1.72	-0.75	-0.0479372		3	8	0	Primary 7		1	0										-1.1929	-1.53208	0.252972	-1.46007	-0.757957	-0.258004	-0.0774717	-0.683379	1.21174	1	Other
155	1.8152	2	6	-1.72	-0.75	-0.0479372		3	8	0	Primary 7		1	0										-1.13236	-0.783928	-0.432924	-1.47248	-0.743527	-0.184036	-0.00205813	-0.658973	-1.10737	1	Other
155	1.8152	2	12	-1.72	-0.75	-0.0479372		3	8	0	Primary 7		1	0										-0.81896	-0.699495	-0.331617	0.241898	-1.38118	-0.703064	-0.33708	-1.53151	-1.01796	1	Mother
155	1.8152	2	24	-1.72	-0.75	-0.0479372		3	8	0	Primary 7		1	0										-0.696543	-0.541076	-0.921427	-0.647094	-0.0455901	-0.433734	-0.739644	0.764953	-0.850192	1	Other	0.898216	1.14936	0.619776	0.233628	0.932442	0.556289	0.00435123	0.374306	1.42964	1	Other
158	3.95346	1	0	-1.49	-1.34	-0.02089	CM	1	8	0	Primary 6 or lower	1	1		1	1	2	1	1	0	3	1	1	-1.31247	-0.91149	-0.758814	-1.21991	-1.00176	-0.784642	-0.4424	-1.51138	0.605834	1	Mother
158	3.95346	1	6	-1.49	-1.34	-0.02089	CM	1	8	0	Primary 6 or lower	1	1		1	1	2	1	1	0	3	1	1	-0.511494	-0.168566	-0.671084	-0.367613	-0.335088	-1.55385	-1.34338	-1.48861	-0.517773	1	Mother
158	3.95346	1	12	-1.49	-1.34	-0.02089	CM	1	8	0	Primary 6 or lower	1	1		1	1	2	1	1	0	3	1	1	-0.690709	-0.749154	0.215859	-0.381754	-0.971857	0.566135	0.546476	0.336879	0.777748	1	Mother
158	3.95346	1	24	-1.49	-1.34	-0.02089	CM	1	8	0	Primary 6 or lower	1	1		1	1	2	1	1	0	3	1	1	-0.325851	0.741483	-0.382829	-0.405691	-0.944038	-0.608519	-0.557046	-0.514916	-0.263358	7	Mother	0.639039	0.498859	0.668474	0.0308478	1.52586	0.385857	-0.274393	0.798502	0.270294	1	Mother
165	2.92676	1	0	-2.2	-0.93	-0.714437		3	6	0	Primary 6 or lower		1	1										1.41524	0.934727	1.38504	0.965669	0.927786	1.45625	1.48199	0.684881	4.03611	5	Mother
165	2.92676	1	6	-2.2	-0.93	-0.714437		3	6	0	Primary 6 or lower		1	1										0.109893	-0.327856	0.307628	-0.342365	0.615374	0.451241	0.446013	0.259458	1.1151	1	Mother
165	2.92676	1	12	-2.2	-0.93	-0.714437		3	6	0	Primary 6 or lower		1	1										1.29219	-0.577892	4.69886	-0.355816	0.304406	2.20787	2.19291	1.18474	0.604451	1	Mother
165	2.92676	1	24	-2.2	-0.93	-0.714437		3	6	0	Primary 6 or lower		1	1										-0.323179	-0.755247	-0.571344	-0.380788	0.660028	1.03938	1.09568	0.334981	-0.429742	1	Mother	0.529877	-0.222134	0.766627	0.950624	0.822912	1.41955	0.479082	0.475522	-0.537373	1	Mother
168	2.31348	1	0	-1.13	0.59	-0.842027	SMA	2	14	0	Secondary or higher	1	1		0	1	0	0	1	0	0	1	1	-0.645365	0.16743	0.0982245	-1.17858	-1.04978	1.1247	1.24938	0.205087	2.13131	1	Mother
168	2.31348	1	6	-1.13	0.59	-0.842027	SMA	2	14	0	Secondary or higher	1	1		0	1	0	0	1	0	0	1	1	2.02151	0.581544	2.92289	0.536625	1.90422	0.480996	0.493027	0.229764	1.01416	2	Mother
168	2.31348	1	12	-1.13	0.59	-0.842027	SMA	2	14	0	Secondary or higher	1	1		0	1	0	0	1	0	0	1	1	-0.521939	0.327155	-0.879965	-0.77196	-0.367156	-0.879979	-0.817134	-0.643997	1.69994	1	Mother
168	2.31348	1	24	-1.13	0.59	-0.842027	SMA	2	14	0	Secondary or higher	1	1		0	1	0	0	1	0	0	1	1	-1.26673	-1.1872	-0.687795	-1.22929	-0.664255	-0.609005	-0.246654	-1.49294	-0.532522	1	Mother	-0.371502	-0.333823	0.111967	-0.536146	0.0120844	-1.23659	0.0872262	-0.357776	-0.254532	1	Mother
172	2.23409	2	0	-0.6	-1.04	1.27555	CM	1	6	0	Primary 6 or lower	1	1		1	1	2	1	1	0	3	1	1	-0.893285	-0.460775	-1.22692	0.257143	-1.07229	-0.554381	-0.429671	-0.662633	0.0812215	1	Other
172	2.23409	2	6	-0.6	-1.04	1.27555	CM	1	6	0	Primary 6 or lower	1	1		1	1	2	1	1	0	3	1	1	-0.712369	-0.722127	-1.13866	-0.186456	-0.0789401	-1.56268	-1.60777	-0.639719	-1.04192	1	Other
172	2.23409	2	12	-0.6	-1.04	1.27555	CM	1	6	0	Primary 6 or lower	1	1		1	1	2	1	1	0	3	1	1	-1.27088	-0.642047	-1.04258	-1.49497	-0.717392	-2.08582	-1.94698	-1.51362	-0.95712	1	Other
172	2.23409	2	24	-0.6	-1.04	1.27555	CM	1	6	0	Primary 6 or lower	1	1		1	1	2	1	1	0	3	1	1	0.961218	0.186616	0.70781	0.207613	1.59808	-0.977829	-0.683921	-1.46413	1.01266	7	Other	-0.341499	-0.117717	-1.1144	-0.0183234	-1.10008	1.22259	-0.935386	-0.140485	-0.0616549	1	Other
173	2.67214	1	0	-1.09	-0.57	-0.577331	SMA	2	9	0	Primary 6 or lower	0	1		0	1	0	0		0	0	1	1	0.019089	-0.445365	0.556579	0.540143	-0.386075	-0.37821	-0.222175	-0.675996	1.59117	1	Mother
173	2.67214	1	6	-1.09	-0.57	-0.577331	SMA	2	9	0	Primary 6 or lower	0	1		0	1	0	0		0	0	1	1	0.204377	0.638557	-0.908164	0.527588	0.281718	0.175579	-0.145923	1.14637	-0.126501	1	Mother
173	2.67214	1	12	-1.09	-0.57	-0.577331	SMA	2	9	0	Primary 6 or lower	0	1		0	1	0	0		0	0	1	1	-0.352794	-0.284334	-0.80999	0.514619	-0.356413	-0.465664	-0.622226	0.273017	-0.640372	1	Mother
173	2.67214	1	24	-1.09	-0.57	-0.577331	SMA	2	9	0	Primary 6 or lower	0	1		0	1	0	0		0	0	1	1	1.13483	2.21885	-0.619386	2.21721	-0.327152	-0.794672	-0.469303	-1.47518	-0.472144	1	Mother	-0.452686	-0.0825556	-0.890464	-0.408961	-0.954845	-0.0270169	-0.644467	0.710103	-0.458969	1	Mother
174	8.99932	2	0	-2.19	-1.46	-1.12395		3	9	1	Secondary or higher		1	1																																0.0547285	-0.306355	0.462209	0.112932
174	8.99932	2	6	-2.19	-1.46	-1.12395		3	9	1	Secondary or higher		1	1																																-0.883363	-0.939551	-0.364969	-0.601822
174	8.99932	2	12	-2.19	-1.46	-1.12395		3	9	1	Secondary or higher		1	1																																-0.0801227	-0.3195	-0.342433	0.539169
174	8.99932	2	24	-2.19	-1.46	-1.12395		3	9	1	Secondary or higher		1	1																																0.0981076	0.296017	0.119948	-0.155717
177	1.71663	1	0	-0.17	-1.54	0.481456	SMA	2	4	0	Primary 6 or lower	0	1		0	0	0	0	0	0	1	1	1
177	1.71663	1	6	-0.17	-1.54	0.481456	SMA	2	4	0	Primary 6 or lower	0	1		0	0	0	0	0	0	1	1	1	0.333818	0.819829	-0.31261	0.983881	-0.399784	-0.0892306	-0.293818	0.649086	-0.289198	1	Mother
177	1.71663	1	12	-0.17	-1.54	0.481456	SMA	2	4	0	Primary 6 or lower	0	1		0	0	0	0	0	0	1	1	1	-0.721688	-1.78019	0.562323	-0.324498	-0.385194	-1.33169	-1.3277	-0.674504	0.395204	1	Mother
177	1.71663	1	24	-0.17	-1.54	0.481456	SMA	2	4	0	Primary 6 or lower	0	1		0	0	0	0	0	0	1	1	1	-0.598262	-0.615756	-0.805812	-0.349815	-0.0291703	-0.701876	-0.757641	-0.175321	-0.0361655	7	Mother
180	3.69884	2	0	-0.82	-0.85	-0.194277	SMA	2	7	0	Primary 6 or lower	0	1		0	1	0	0	0	0	0	1	1	2.38863	2.4513	0.612247	1.948	1.91001	0.264218	-0.0667573	1.2076	2.12936	5	Mother
180	3.69884	2	6	-0.82	-0.85	-0.194277	SMA	2	7	0	Primary 6 or lower	0	1		0	1	0	0	0	0	0	1	1	0.0919897	0.185746	-0.853018	1.50357	-0.36169	-0.140402	0.00907537	-0.565552	-0.789814	1	Mother
180	3.69884	2	12	-0.82	-0.85	-0.194277	SMA	2	7	0	Primary 6 or lower	0	1		0	1	0	0	0	0	0	1	1	0.405729	0.940422	-0.751189	0.62624	0.307146	-0.419519	-0.325527	-0.539112	1.70214	1	Mother
180	3.69884	2	24	-0.82	-0.85	-0.194277	SMA	2	7	0	Primary 6 or lower	0	1		0	1	0	0	0	0	0	1	1	-0.70155	-0.561317	0.625963	-1.12891	-0.967433	-0.735377	-0.853032	-0.0358607	0.0835551	1	Other	0.454371	0.838071	-0.0646099	-0.0806363	0.418286	0.397617	-0.453391	0.704268	0.790727	1	Other
183	1.64545	1	0	-1.14	-3.05	-1.37142	CM	1	8	0	Primary 7	0	1		1	0	2	1	1	0	2	1	1	0.637449	0.731045	1.14064	-0.29787	0.237064	-0.0533115	0.17578	-0.726841	0.217298	5	Other
183	1.64545	1	6	-1.14	-3.05	-1.37142	CM	1	8	0	Primary 7	0	1		1	0	2	1	1	0	2	1	1	0.823073	1.14559	-0.323576	1.41727	0.251735	0.500889	0.807519	-0.702029	-0.899395	1	Other
183	1.64545	1	12	-1.14	-3.05	-1.37142	CM	1	8	0	Primary 7	0	1		1	0	2	1	1	0	2	1	1	2.12541	2.56486	0.161933	0.108823	2.87922	2.25259	2.54939	0.221629	1.58702	2	Other
183	1.64545	1	24	-1.14	-3.05	-1.37142	CM	1	8	0	Primary 7	0	1		1	0	2	1	1	0	2	1	1	0.409507	0.408541	-0.782313	1.37485	0.301039	0.274614	0.510115	-0.618641	0.585094	1	Mother	2.03289	2.52138	1.32163	1.32055	0.940773	1.32388	1.19743	2.01542	2.48228	1	Mother
186	2.32444	2	0	-2.79	-2.38	0.481456	SMA	2	11	0	Primary 7	0	1		0	1	0	0	0	0	0	1	1	-0.13771	0.5583	0.350101	-0.609016	-0.743046	-0.30132	-0.138311	-0.658159	-1.10461	1	Other
186	2.32444	2	6	-2.79	-2.38	0.481456	SMA	2	11	0	Primary 7	0	1		0	1	0	0	0	0	0	1	1	-0.820978	-0.0322986	-1.11464	-0.621571	-0.728455	-0.945029	-1.44973	1.16421	-1.02072	2	Other
186	2.32444	2	12	-2.79	-2.38	0.481456	SMA	2	11	0	Primary 7	0	1		0	1	0	0	0	0	0	1	1	-0.881495	0.0499578	-0.626	-0.634609	-1.36651	0.0906362	0.0171251	0.290989	-0.933614	1	Mother
186	2.32444	2	24	-2.79	-2.38	0.481456	SMA	2	11	0	Primary 7	0	1		0	1	0	0	0	0	0	1	1	-1.37947	-1.13124	-0.825864	-0.659719	-1.33733	-0.717782	-1.07927	0.789766	-0.765848	1	Mother	-0.896072	-0.300358	-1.19942	-1.4941	-0.421565	-0.912181	-1.73325	0.854925	-0.82213	1	Mother
193	5.48939	1	0	-0.85	-1.06	-0.887823		3	8	1	Secondary or higher		1	0										1.35779	2.0119	0.314033	-1.25861	2.30923	-0.673858	-0.623661	-0.536474	4.46751	1	Other
193	5.48939	1	6	-0.85	-1.06	-0.887823		3	8	1	Secondary or higher		1	0										2.28352	1.41608	3.91232	-0.40645	1.66966	0.23425	0.141398	0.38542	2.74431	2	Other
193	5.48939	1	12	-0.85	-1.06	-0.887823		3	8	1	Secondary or higher		1	0																																-0.101355	-0.145807	-0.0626415	-0.0334505
193	5.48939	1	24	-0.85	-1.06	-0.887823		3	8	1	Secondary or higher		1	0																																-0.398861	-0.783212	-0.451069	0.382444
194	6.2204	1	0	-0.36	-1.24	-0.361793	SMA	2	8	1	Secondary or higher	0	1		1	1	0	0	0	0	0	1	1																							1.95023	0.797608	0.775148	2.92042
194	6.2204	1	6	-0.36	-1.24	-0.361793	SMA	2	8	1	Secondary or higher	0	1		1	1	0	0	0	0	0	1	1
194	6.2204	1	12	-0.36	-1.24	-0.361793	SMA	2	8	1	Secondary or higher	0	1		1	1	0	0	0	0	0	1	1																							-0.561113	-0.780978	0.39044	-0.739903
194	6.2204	1	24	-0.36	-1.24	-0.361793	SMA	2	8	1	Secondary or higher	0	1		1	1	0	0	0	0	0	1	1																							-0.539481	-0.79312	-0.417593	0.0531005
196	3.54004	1	0	-2.42	-2.09	-0.367663	CM	1	8	0	Primary 7	0	1		0	0	1	1	0	1	2	0	1	0.497937	0.362408	-0.0577749	0.950217	0.292541	0.231055	0.743238	-1.53186	-0.664799	5	Mother
196	3.54004	1	6	-2.42	-2.09	-0.367663	CM	1	8	0	Primary 7	0	1		0	0	1	1	0	1	2	0	1	0.807641	-0.562659	3.15736	-1.22211	0.960415	-0.531993	-0.428993	-0.608201	-0.580455	3	Mother
196	3.54004	1	12	-2.42	-2.09	-0.367663	CM	1	8	0	Primary 7	0	1		0	0	1	1	0	1	2	0	1	0.86885	-0.148545	2.4725	-0.370786	0.648404	0.860046	0.896161	0.315321	-0.496572	1	Mother
196	3.54004	1	24	-2.42	-2.09	-0.367663	CM	1	8	0	Primary 7	0	1		0	0	1	1	0	1	2	0	1	-0.246837	-0.656452	-0.0628579	-0.396448	0.351625	1.01291	1.05202	0.36576	-0.325118	1	Mother	1.60134	1.06319	2.03529	1.42507	1.85022	0.808813	1.71292	1.94618	0.472035	1	Mother
197	3.33744	2	0	-0.36	0.62	-0.714437	SMA	2	8	0	Primary 7	0	1		0	0	0	0	0		0	1	1	-0.261434	-0.620286	-0.236576	-1.49842	1.24623	-0.149275	0.29424	-1.50684	-0.934075	3	Mother
197	3.33744	2	6	-0.36	0.62	-0.714437	SMA	2	8	0	Primary 7	0	1		0	0	0	0	0		0	1	1	-0.942012	-1.2074	-0.917249	-0.647646	-0.0449488	-0.0711969	0.0963096	-0.582229	0.354533	1	Mother
197	3.33744	2	12	-0.36	0.62	-0.714437	SMA	2	8	0	Primary 7	0	1		0	0	0	0	0		0	1	1	-0.63399	-0.460125	-0.824297	0.203957	-0.683882	-0.23755	-0.106648	-0.558094	-0.764465	1	Mother
197	3.33744	2	24	-0.36	0.62	-0.714437	SMA	2	8	0	Primary 7	0	1		0	0	0	0	0		0	1	1												0.435434	-0.62579	1.63982	0.767612	1.56652	-0.0326022	1.29238	-0.0842956	-0.81448	1	Mother
200	1.83984	2	0	-1.68	-2.05	1.27555	CM	1	9	0	Secondary or higher	1	1		1	1	4	1	1	0	3	1	1	-0.197237	-0.188542	-0.52222	0.267077	-0.104033	-0.853055	-0.490002	-1.581	0.0148525	1	Mother
200	1.83984	2	6	-1.68	-2.05	1.27555	CM	1	9	0	Secondary or higher	1	1		1	1	4	1	1	0	3	1	1	-0.758107	-1.45112	-1.20968	-0.177074	0.56336	-0.30132	-0.138311	-0.658159	0.0964311	1	Mother
200	1.83984	2	12	-1.68	-2.05	1.27555	CM	1	9	0	Secondary or higher	1	1		1	1	4	1	1	0	3	1	1	-0.945394	-1.03745	-1.11516	-0.621502	-0.0753325	-0.466441	-0.340012	-0.633617	0.179853	1	Mother
200	1.83984	2	24	-1.68	-2.05	1.27555	CM	1	9	0	Secondary or higher	1	1		1	1	4	1	1	0	3	1	1	1.03855	-0.208783	2.9749	0.217202	0.28053	0.402049	0.367978	0.314717	0.348081	2	Mother	-0.600476	-0.961952	-0.240126	-0.280302	-0.139267	0.00573404	-0.419907	0.0520463	-1.31414	1	Mother
201	2.19028	1	0	0.15	-2.23	1.27555	SMA	2	15	0	Secondary or higher	0	1		0	1	0	0	1	0	2	1	1	-0.28826	0.147845	-1.09511	-0.311598	0.253018	-0.929534	-0.573447	-1.5987	0.309017	5	Mother
201	2.19028	1	6	0.15	-2.23	1.27555	SMA	2	15	0	Secondary or higher	0	1		0	1	0	0	1	0	2	1	1	0.0224521	0.898604	-0.997983	0.539453	-0.385274	-0.374101	-0.217986	-0.67464	-0.205775	1	Mother
201	2.19028	1	12	0.15	-2.23	1.27555	SMA	2	15	0	Secondary or higher	0	1		0	1	0	0	1	0	2	1	1	-1.15142	-1.02421	-0.894065	-0.338157	-1.02252	-1.25032	-0.967213	-1.5465	-0.714576	1	Mother
201	2.19028	1	24	0.15	-2.23	1.27555	SMA	2	15	0	Secondary or higher	0	1		0	1	0	0	1	0	2	1	1	-0.538062	-0.202948	-0.712338	-1.22605	0.311781	-0.867819	-0.821413	-0.600473	-0.554184	1	Mother	-1.1402	-1.55154	-0.0451917	-0.962857	-0.0238623	-1.82451	-0.160848	-1.66739	-1.26326	1	Mother
206	2.28611	2	0	-0.87	-3.52	-0.0479372	SMA	2	7	0	Primary 7	0	1		0	1	0	0	0	0	1	1	1	-1.50729	-1.12231	-1.21699	-0.60805	-1.39737	0.291676	0.549658	-0.660057	0.0899786	1	Mother
206	2.28611	2	6	-0.87	-3.52	-0.0479372	SMA	2	7	0	Primary 7	0	1		0	1	0	0	0	0	1	1	1	-1.82572	-1.38758	-1.13344	-1.48297	-1.38454	1.19567	1.03299	1.15933	0.163722	3	Mother
206	2.28611	2	12	-0.87	-3.52	-0.0479372	SMA	2	7	0	Primary 7	0	1		0	1	0	0	0	0	1	1	1	-0.0270643	0.0316785	-1.03788	1.09605	-0.0634676	0.312876	0.277062	0.285294	1.4491	1	Mother
206	2.28611	2	24	-0.87	-3.52	-0.0479372	SMA	2	7	0	Primary 7	0	1		0	1	0	0	0	0	1	1	1	-0.896946	-0.479275	-0.847274	-1.52077	-0.0342061	1.18137	1.54012	-0.56406	0.416293	1	Mother	-0.331888	-1.27802	0.114348	0.752572	-0.239498	1.2308	0.330035	-0.449325	-1.5033	1	Mother
209	2.55989	2	0	-0.19	-0.8	0.746153	CM	1	9	0	Primary 7	0	1		0	0	0	1	1	1	2	1	1	0.511609	0.595729	0.395011	1.11282	-0.40955	-0.864729	-0.796115	-0.646498	0.136068	5	Mother
209	2.55989	2	6	-0.19	-0.8	0.746153	CM	1	9	0	Primary 7	0	1		0	0	0	1	1	1	2	1	1	1.44137	1.34475	0.490051	0.66832	1.56465	0.407559	0.94534	-1.52067	-0.981086	3	Mother
209	2.55989	2	12	-0.19	-0.8	0.746153	CM	1	9	0	Primary 7	0	1		0	0	0	1	1	1	2	1	1	0.148471	0.098267	-0.568035	1.0855	-0.0512019	0.375749	0.618698	-0.592805	-0.882455	1	Mother
209	2.55989	2	24	-0.19	-0.8	0.746153	CM	1	9	0	Primary 7	0	1		0	0	0	1	1	1	2	1	1	-0.358926	-0.425308	-0.00262929	-0.665444	-0.0242653	0.274324	0.481937	-0.547247	-0.727593	1	Mother	1.6797	1.53904	1.55083	1.25404	1.56273	1.34381	1.06037	1.24608	1.5076	1	Mother
210	4	1	0	0.95	0.15	-0.02089		3	8	1	Primary 6 or lower		1	1										1.67115	2.11004	0.809847	-0.357196	1.93902	0.539592	0.674858	-0.160813	1.21419	5	Mother
210	4	1	6	0.95	0.15	-0.02089		3	8	1	Primary 6 or lower		1	1										1.85375	2.52068	0.90071	0.494683	1.29976	0.730844	1.02529	-0.586642	1.8949	5	Mother
210	4	1	12	0.95	0.15	-0.02089		3	8	1	Primary 6 or lower		1	1										-0.0706485	-0.0797809	-0.564555	0.0502559	0.334469	-0.272525	-0.147778	-0.562101	-0.42375	1	Mother
210	4	1	24	0.95	0.15	-0.02089		3	8	1	Primary 6 or lower		1	1																																-0.58736	-0.139526	-0.508394	-0.801823
211	1.76318	1	0	-1.55	-1.6	0.21676	SMA	2	6	0	Secondary or higher	0	1		0	1	0	0	1	0	1	1	1	-0.0925661	-0.589857	0.383208	0.563046	-0.412691	-0.51464	-0.638806	0.177833	0.237117	1	Mother
211	1.76318	1	6	-1.55	-1.6	0.21676	SMA	2	6	0	Secondary or higher	0	1		0	1	0	0	1	0	1	1	1	2.85173	1.53664	2.86336	1.84031	2.22169	2.2304	2.24923	1.11315	0.361098	1	Mother
211	1.76318	1	12	-1.55	-1.6	0.21676	SMA	2	6	0	Secondary or higher	0	1		0	1	0	0	1	0	1	1	1	0.0285057	0.23663	-0.208691	-0.325671	0.269372	0.711044	0.760924	0.226646	0.40304	1	Mother
211	1.76318	1	24	-1.55	-1.6	0.21676	SMA	2	6	0	Secondary or higher	0	1		0	1	0	0	1	0	1	1	1	1.76429	2.73981	-0.0180876	0.513033	1.60504	1.22028	1.60768	-0.622709	-0.629771	7	Mother	0.0664092	-0.316256	0.688287	0.0211562	0.704404	-0.338723	0.334208	0.0872307	-0.444152	1	Mother
212	2.83094	2	0	-3.9	-1.89	0.21676	SMA	2	8	0	Primary 6 or lower	0	1		0	0	0	0	1	1	2	1	1	2.28202	2.64824	0.446709	1.10599	2.2112	0.732701	0.771799	0.26577	-1.01934	5	Mother
212	2.83094	2	6	-3.9	-1.89	0.21676	SMA	2	8	0	Primary 6 or lower	0	1		0	0	0	0	1	1	2	1	1	0.357954	0.383121	-1.01803	1.52537	0.26618	1.28649	1.12558	1.18929	3.86869	3	Mother
212	2.83094	2	12	-3.9	-1.89	0.21676	SMA	2	8	0	Primary 6 or lower	0	1		0	0	0	0	1	1	2	1	1	-0.0774916	0.126991	-0.53357	0.217064	-0.0459107	2.07937	2.03402	1.21383	1.55004	1	Mother
212	2.83094	2	24	-3.9	-1.89	0.21676	SMA	2	8	0	Primary 6 or lower	0	1		0	0	0	0	1	1	2	1	1	0.665659	0.285846	0.826872	0.191885	0.636554	0.792362	1.07681	-0.534366	1.71827	1	Mother	2.00223	2.57207	1.37706	0.584116	2.06224	0.885312	0.299267	0.380394	3.36488	1	Mother
213	1.58522	1	0	0.12	-2.96	-1.63612	SMA	2	7	0	Primary 7	0	1		1	1	0	0	0	0	2	1	1	-1.10706	-1.28795	-0.430627	-1.16023	-0.417902	-0.541351	-0.666038	0.16902	0.807678	3	Mother
213	1.58522	1	6	0.12	-2.96	-1.63612	SMA	2	7	0	Primary 7	0	1		1	1	0	0	0	0	2	1	1	-0.790968	-1.20004	-0.325142	-1.17417	0.251495	-0.458343	-0.997708	1.54468	-0.900778	3	Mother
213	1.58522	1	12	0.12	-2.96	-1.63612	SMA	2	7	0	Primary 7	0	1		1	1	0	0	0	0	2	1	1	0.882264	0.552384	0.548224	0.541247	0.919048	-0.863785	-0.783946	-0.678165	0.38276	1	Mother
213	1.58522	1	24	0.12	-2.96	-1.63612	SMA	2	7	0	Primary 7	0	1		1	1	0	0	0	0	2	1	1	-0.607342	-0.292603	-0.819912	-1.21183	0.295267	-0.353722	-0.491419	0.270441	-0.649128	1	Mother	1.01641	0.810212	0.779258	1.63172	-0.394839	1.5308	1.55796	0.0496543	1.12892	1	Mother
214	3.1896	2	0	0.82	-1.59	-0.367663	CM	1	3	0	Primary 6 or lower	1	1		1	1	2	1	0	0	2	1	1	-1.27223	-0.643788	-0.264775	-1.4947	-1.37092	0.547034	0.271616	1.18238	1.44311	1	Other
214	3.1896	2	6	0.82	-1.59	-0.367663	CM	1	3	0	Primary 6 or lower	1	1		1	1	2	1	0	0	2	1	1	1.27763	-0.220534	2.18091	0.651005	1.25817	1.82795	1.8831	0.760478	0.936155	2	Other
214	3.1896	2	12	0.82	-1.59	-0.367663	CM	1	3	0	Primary 6 or lower	1	1		1	1	2	1	0	0	2	1	1	-0.770512	-1.48094	-0.453673	0.206509	-0.360246	0.345994	0.571685	-0.563111	0.419519	1	Mother
214	3.1896	2	24	0.82	-1.59	-0.367663	CM	1	3	0	Primary 6 or lower	1	1		1	1	2	1	0	0	2	1	1	-1.14408	-0.652278	0.126877	-1.54643	-1.31079	-0.222513	-0.385529	0.385223	1.18827	7	Mother	0.12064	0.389876	-0.342242	-0.0294975	-0.168409	0.479673	-0.414453	-0.116504	0.602904	1	Mother
215	3.16769	2	0	-1.01	1.02	-0.887823		3	9	0	Primary 7		1	0										-0.530444	-1.31708	-1.04884	1.96138	-0.718354	-1.37225	-1.11941	-1.51524	0.238387	1	Mother
215	3.16769	2	6	-1.01	1.02	-0.887823		3	9	0	Primary 7		1	0										-0.345493	-0.568495	-0.954326	0.653075	-0.0506406	-1.77687	-1.59864	-1.4907	1.52285	1	Mother
215	3.16769	2	12	-1.01	1.02	-0.887823		3	9	0	Primary 7		1	0										-0.160205	-0.489285	-0.079393	1.07246	-0.689253	-0.983582	-0.967321	-0.567179	-0.795345	1	Mother
215	3.16769	2	24	-1.01	1.02	-0.887823		3	9	0	Primary 7		1	0										-0.28561	-0.33043	-0.668681	1.04728	-0.659991	-0.713841	-0.675631	-0.517689	0.57392	1	Mother	-1.29314	-1.39518	-0.853374	-0.312677	-1.89875	-1.18293	0.399751	-1.41091	-1.19596	2	Mother
218	2.62834	2	0	-2.19	-2.36	-0.577331	SMA	2	8	0	Secondary or higher	0	1		1	0	0	0	1	0	1	1	1	-0.224459	0.941513	-0.371826	-0.616673	-0.734147	-0.495206	-0.36934	-0.643109	-1.05345	5	Other
218	2.62834	2	6	-2.19	-2.36	-0.577331	SMA	2	8	0	Secondary or higher	0	1		1	0	0	0	1	0	1	1	1	-1.15555	-0.653362	-1.05616	-0.629297	-1.04608	-1.378	-1.4028	-0.618296	-0.969103	1	Other
218	2.62834	2	12	-2.19	-2.36	-0.577331	SMA	2	8	0	Secondary or higher	0	1		1	0	0	0	1	0	1	1	1	-0.350201	0.430124	-0.961636	0.2221	-0.704966	-0.585126	-0.771904	0.30509	-0.885681	1	Other
218	2.62834	2	24	-2.19	-2.36	-0.577331	SMA	2	8	0	Secondary or higher	0	1		1	0	0	0	1	0	1	1	1	-0.97226	-0.751072	-0.771555	-0.666893	-0.675785	-0.794795	-0.758168	-0.5444	-0.717915	1	Other	-0.287582	-0.661539	-0.0222315	0.00416534	0.0848249	0.27278	-0.180543	-0.319597	-0.728668	1	Mother
224	3.20876	2	0	-3.07	-2.31	-0.194277		3	8	0	Primary 7		1	0										-0.277241	-0.305837	1.68861	-1.49518	-0.717151	0.0709112	0.552082	-1.51321	-0.955737	3	Mother
224	3.20876	2	6	-3.07	-2.31	-0.194277		3	8	0	Primary 7		1	0										-0.716722	-0.567189	-0.952759	-1.50684	0.602803	0.0206094	-0.070947	0.307395	0.923711	3	Mother
224	3.20876	2	12	-3.07	-2.31	-0.194277		3	8	0	Primary 7		1	0										-0.0351165	-1.15779	1.48196	-0.65551	0.290792	0.933648	0.976673	0.332073	0.407075	1	Mother
224	3.20876	2	24	-3.07	-2.31	-0.194277		3	8	0	Primary 7		1	0										0.33815	0.00882617	0.896325	-0.681172	0.647216	0.607517	0.438694	0.831934	0.578529	1	Mother	0.70725	0.252417	0.62053	0.967296	0.669991	1.55162	0.40792	0.499386	0.101685	1	Mother
226	3.33744	1	0	-2.29	-2.41	-1.2346	CM	1	8	0	Not known	0	1		1	0	9	1	0	0	2	1	1	0.845289	-1.00941	3.02315	-0.340502	0.939811	-0.517853	-0.675434	0.255797	-0.698905	1	Mother
226	3.33744	1	6	-2.29	-2.41	-1.2346	CM	1	8	0	Not known	0	1		1	0	9	1	0	0	2	1	1	-0.701154	-1.59305	0.78687	-0.354161	-0.677323	-0.0772385	-0.176178	0.282644	0.59339	1	Mother
226	3.33744	1	12	-2.29	-2.41	-1.2346	CM	1	8	0	Not known	0	1		1	0	9	1	0	0	2	1	1	0.366142	-1.49643	4.02237	-0.369475	-0.659525	0.133739	0.0555991	0.312744	1.89675	1	Other
226	3.33744	1	24	-2.29	-2.41	-1.2346	CM	1	8	0	Not known	0	1		1	0	9	1	0	0	2	1	1	0.481496	-1.34715	4.20148	-0.393136	-0.632028	0.633939	0.615605	0.359251	-0.347241	1	Other	3.81614	4.99038	2.36621	1.63252	2.88063	1.85524	1.25435	5	4.29486	1	Other
228	3.03901	2	0	-0.4	-1.44	0.325883	CM	1	7	0	Primary 6 or lower	0	1		1	0	2	1	1	0	2	1	1	1.68718	2.01151	-0.293496	0.668803	2.21729	1.84168	2.05254	0.276074	0.817244	5	Mother
228	3.03901	2	6	-0.4	-1.44	0.325883	CM	1	7	0	Primary 6 or lower	0	1		1	0	2	1	1	0	2	1	1	0.387885	0.756759	-0.581612	0.22341	0.599917	0.844065	0.885339	0.302514	-0.894438	1	Mother
228	3.03901	2	12	-0.4	-1.44	0.325883	CM	1	7	0	Primary 6 or lower	0	1		1	0	2	1	1	0	2	1	1	-0.792036	-0.504082	-0.87704	-0.221017	-0.691979	0.199945	0.406104	-0.571789	-0.811016	1	Mother
228	3.03901	2	24	-0.4	-1.44	0.325883	CM	1	7	0	Primary 6 or lower	0	1		1	0	2	1	1	0	2	1	1	-0.793362	0.324581	-0.686436	-1.54202	-0.662717	-0.129063	0.00395851	-0.522299	0.558249	1	Mother	0.273374	-0.143555	0.343398	0.924577	-0.217358	0.966429	0.791331	-0.807548	0.223225	1	Mother
229	3.90965	2	0	-1.49	-0.12	-0.887823		3	10	1	Secondary or higher		1	0										1.42189	1.1452	-0.127436	1.94269	1.26298	-1.38064	-1.14463	-1.4785	-0.837748	5	Mother
229	3.90965	2	6	-1.49	-0.12	-0.887823		3	10	1	Secondary or higher		1	0
229	3.90965	2	12	-1.49	-0.12	-0.887823		3	10	1	Secondary or higher		1	0										-0.315542	-0.369165	-0.715157	0.189539	-0.0139236	0.207585	-0.0190847	0.818511	-0.668138	1	Mother
229	3.90965	2	24	-1.49	-0.12	-0.887823		3	10	1	Secondary or higher		1	0										0.0580606	-0.206828	-0.520376	1.02769	0.0159793	0.00161368	0.414723	-1.37803	-0.496223	1	Mother	-0.934589	-0.519227	-1.131	-0.799105	-1.25469	-0.924086	-0.626306	-0.52304	-0.457487	2	Mother
232	4.2026	1	0	-0.85	-1.02	0.672657	SMA	2	9	1	Secondary or higher	0	1		0	0	0	0	1	0	0	1	1	0.827483	0.802635	0.068598	1.7974	-0.0146599	0.570001	0.844628	-0.600201	0.647776	5	Mother
232	4.2026	1	6	-0.85	-1.02	0.672657	SMA	2	9	1	Secondary or higher	0	1		0	0	0	0	1	0	0	1	1	-0.226677	-0.121127	-0.614164	0.488751	-0.32635	0.885934	0.922556	0.323863	1.93454	1	Mother
232	4.2026	1	12	-0.85	-1.02	0.672657	SMA	2	9	1	Secondary or higher	0	1		0	0	0	0	1	0	0	1	1	1.69572	1.96751	0.260768	2.20396	0.668045	0.840975	0.998808	-0.100882	0.817386	2	Mother
232	4.2026	1	24	-0.85	-1.02	0.672657	SMA	2	9	1	Secondary or higher	0	1		0	0	0	0	1	0	0	1	1																							-1.05716	-1.39578	-1.34793	0.322974
233	3.718	2	0	-1.11	-0.87	0.49927	SMA	2	7	0	Not known	0	1		0	0	0	0	0	0	0	1	1	1.27427	1.44963	1.00585	1.08364	0.277564	1.58434	1.46261	1.20854	1.53207	5	Mother
233	3.718	2	6	-1.11	-0.87	0.49927	SMA	2	7	0	Not known	0	1		0	0	0	0	0	0	0	1	1	1.33514	1.1935	2.2702	-0.656614	0.945278	1.89822	1.53844	2.13193	2.21601	2	Mother
233	3.718	2	12	-1.11	-0.87	0.49927	SMA	2	7	0	Not known	0	1		0	0	0	0	0	0	0	1	1	-1.08524	-1.74142	-0.364376	-0.237228	-0.673139	0.655764	0.920861	-0.539925	0.498333	1	Mother
233	3.718	2	24	-1.11	-0.87	0.49927	SMA	2	7	0	Not known	0	1		0	0	0	0	0	0	0	1	1	0.774623	1.09667	2.55585	-1.55823	0.0093253	2.48225	2.46145	1.30725	-0.534478	7	Mother	2.56931	3.25512	2.22904	0.644629	2.95031	0.0904396	0.983313	3.83919	2.52848	1	Mother
234	4.99932	2	0	1.33	-0.31	0.672657	SMA	2	14	1	Primary 6 or lower	0	1		0	1	0	0	1	0	0	1	1	1.05942	1.65332	-0.309545	1.05135	0.641684	-0.498586	-0.561583	-0.0762663	-0.654311	5	Mother
234	4.99932	2	6	1.33	-0.31	0.672657	SMA	2	14	1	Primary 6 or lower	0	1		0	1	0	0	1	0	0	1	1	-0.988048	-0.276028	-0.603406	-0.689105	-1.30317	-0.542724	-0.484494	-0.50074	-0.569506	1	Mother
234	4.99932	2	12	1.33	-0.31	0.672657	SMA	2	14	1	Primary 6 or lower	0	1		0	1	0	0	1	0	0	1	1
234	4.99932	2	24	1.33	-0.31	0.672657	SMA	2	14	1	Primary 6 or lower	0	1		0	1	0	0	1	0	0	1	1																							-0.620525	-0.282687	-0.466819	-0.728519
236	3.90418	1	0	-0.96	0.77	-0.887823	SMA	2	7	0	Primary 7	1	1		1	1	0	0	0	0	1	1	1	1.5353	1.0901	3.52119	-0.354782	0.303203	1.72271	2.46416	-1.51383	0.597538	5	Mother
236	3.90418	1	6	-0.96	0.77	-0.887823	SMA	2	7	0	Primary 7	1	1		1	1	0	0	0	0	1	1	1	0.60522	0.166338	1.66859	-1.23149	0.971318	1.91889	2.40332	-0.589761	0.683265	1	Mother
236	3.90418	1	12	-0.96	0.77	-0.887823	SMA	2	7	0	Primary 7	1	1		1	1	0	0	0	0	1	1	1	1.41797	-0.41512	4.11427	-0.381616	0.987592	2.72081	3.04344	0.336608	-0.424211	1	Mother
236	3.90418	1	24	-0.96	0.77	-0.887823	SMA	2	7	0	Primary 7	1	1		1	1	0	0	0	0	1	1	1	-0.0719747	0.0790738	0.405941	-0.406864	-0.289473	1.79346	1.94788	0.386234	-0.255523	1	Mother	2.31529	2.85535	1.78097	0.936537	2.17913	0.673895	0.997564	2.08128	2.86288	1	Mother
238	3.32101	1	0	0.17	-2.49	-0.714437	SMA	2	9	0	Secondary or higher	0	1		0	1	0	0	1	0	0	1	1	0.843271	0.662494	2.24012	-0.340088	-0.0404741	0.43768	0.29342	0.704406	0.499367	5	Mother
238	3.32101	1	6	0.17	-2.49	-0.714437	SMA	2	9	0	Secondary or higher	0	1		0	1	0	0	1	0	0	1	1	0.165048	-0.25648	-0.776569	0.510204	0.955123	0.758134	0.792258	0.281695	0.590164	1	Mother
238	3.32101	1	12	0.17	-2.49	-0.714437	SMA	2	9	0	Secondary or higher	0	1		0	1	0	0	1	0	0	1	1	0.102513	-1.18155	0.488832	0.929522	0.316591	1.19258	1.56276	-0.592337	-0.52653	1	Mother
238	3.32101	1	24	0.17	-2.49	-0.714437	SMA	2	9	0	Secondary or higher	0	1		0	1	0	0	1	0	0	1	1	-0.76636	-1.35629	-0.488836	0.904136	-0.960313	-0.212939	-0.642096	1.25525	-0.35692	1	Mother
244	4.00821	1	0	0.8	-1.38	-1.2346	CM	1	9	0	Secondary or higher	0	2		0	1	0	1	0	0	2	0	0	1.17584	0.771734	-0.358424	0.93842	1.93926	-0.0579246	0.121047	-0.609828	-0.585986	2	Mother
244	4.00821	1	6	0.8	-1.38	-1.2346	CM	1	9	0	Secondary or higher	0	2		0	1	0	1	0	0	2	0	0	-0.00172409	-0.151157	-0.650196	-0.370372	0.974524	0.0193313	0.338579	-1.03376	0.701701	1	Mother
244	4.00821	1	12	0.8	-1.38	-1.2346	CM	1	9	0	Secondary or higher	0	2		0	1	0	1	0	0	2	0	0	-0.560576	-0.74132	-0.554633	0.0489453	-0.317211	0.453782	0.692784	-0.559525	-0.414993	1	Mother
244	4.00821	1	24	0.8	-1.38	-1.2346	CM	1	9	0	Secondary or higher	0	2		0	1	0	1	0	0	2	0	0																							-0.902749	-0.766894	-0.506206	-0.799101
247	2.88022	1	0	0.41	-0.31	1.01085	CM	1	8	0	Primary 6 or lower	0	2		1	1	3	1	1	0	2	1	1	-0.947987	-0.412288	-0.963517	-0.328982	-1.03319	-0.586479	-0.745402	0.233154	1.6262	1	Mother
247	2.88022	1	6	0.41	-0.31	1.01085	CM	1	8	0	Primary 6 or lower	0	2		1	1	3	1	1	0	2	1	1	-0.142638	0.671199	-0.868999	-0.341468	-0.0388707	-0.5121	-0.669569	0.257695	0.508585	1	Mother
247	2.88022	1	12	0.41	-0.31	1.01085	CM	1	8	0	Primary 6 or lower	0	2		1	1	3	1	1	0	2	1	1	-0.324207	-0.24734	-0.765603	1.37264	-1.0028	-0.310985	-0.586613	0.733964	-0.601195	1	Mother
247	2.88022	1	24	0.41	-0.31	1.01085	CM	1	8	0	Primary 6 or lower	0	2		1	1	3	1	1	0	2	1	1	-0.573692	0.581323	-0.574999	-0.812247	-0.97354	0.318006	-0.0173903	1.23288	-0.432968	1	Mother	0.190783	0.472407	0.0281874	-0.453462	0.604134	-0.222089	-0.575027	0.786151	0.261745	1	Mother
248	4.02464	1	0	-1.73	-2.36	-0.02089	CM	1	8	0	Secondary or higher	1	2		1	1	1	1	0	0	2	1	1	0.681544	-0.230367	1.59444	0.506065	0.306731	0.78279	0.817395	0.28983	1.81886	1	Mother
248	4.02464	1	6	-1.73	-2.36	-0.02089	CM	1	8	0	Secondary or higher	1	2		1	1	1	1	0	0	2	1	1	0.493921	0.182877	0.908543	0.0617072	0.321161	0.0185092	0.198975	-0.584609	0.700779	1	Mother
248	4.02464	1	12	-1.73	-2.36	-0.02089	CM	1	8	0	Secondary or higher	1	2		1	1	1	1	0	0	2	1	1	-1.05219	-0.735227	-0.547322	-1.24784	-0.64269	-0.258964	-0.133952	-0.557626	-0.408541	1	Mother
248	4.02464	1	24	-1.73	-2.36	-0.02089	CM	1	8	0	Secondary or higher	1	2		1	1	1	1	0	0	2	1	1																							-0.738882	-0.770034	-0.495594	-0.414915
249	2.59548	1	0	0.34	-0.43	-0.842027	CM	1	9	0	Primary 6 or lower	0	2		0	1	3	1	0	0	2	0	0	-1.10704	-1.12736	-0.627881	-0.321808	-1.04152	-0.629216	-0.788974	0.219053	0.37723	1	Other
249	2.59548	1	6	0.34	-0.43	-0.842027	CM	1	9	0	Primary 6 or lower	0	2		0	1	3	1	0	0	2	0	0	0.442783	-0.0438721	1.41637	-0.334294	0.279393	-0.794337	-0.713141	-0.65525	-0.740386	1	Other
249	2.59548	1	12	0.34	-0.43	-0.842027	CM	1	9	0	Primary 6 or lower	0	2		0	1	3	1	0	0	2	0	0	0.135116	0.374594	0.736739	-0.347538	-0.358417	-0.356188	-0.771467	1.16847	-0.651894	1	Other
249	2.59548	1	24	0.34	-0.43	-0.842027	CM	1	9	0	Primary 6 or lower	0	2		0	1	3	1	0	0	2	0	0	-0.983261	-0.806603	-0.632964	-0.372648	-0.982439	-0.925106	-1.03526	-0.130441	-0.484128	1	Other	-0.0935634	-0.109214	-0.05436	-0.180151	0.0923904	-0.0507136	-0.246351	0.0530578	-0.160171	1	Other
250	4.16153	1	0	-1.81	-2.55	0.49927	SMA	2	8	0	Primary 7	0	2		1	1	0	0	1	0	2	1	1	3.42811	3.14044	0.840657	2.66232	3.25015	2.83908	2.64231	2.0943	-0.560176	1	Mother
250	4.16153	1	6	-1.81	-2.55	0.49927	SMA	2	8	0	Primary 7	0	2		1	1	0	0	1	0	2	1	1	2.00507	1.55122	-0.616775	1.78492	2.93926	-0.553118	-0.189674	-1.4745	1.93224	1	Mother
250	4.16153	1	12	-1.81	-2.55	0.49927	SMA	2	8	0	Primary 7	0	2		1	1	0	0	1	0	2	1	1	1.43815	0.615705	3.36571	0.0461859	0.339199	2.38622	2.09721	2.14243	0.80448	2	Mother
250	4.16153	1	24	-1.81	-2.55	0.49927	SMA	2	8	0	Primary 7	0	2		1	1	0	0	1	0	2	1	1																							-0.267413	-0.141436	-0.501939	-0.0518222
251	5.13621	1	0	-2.06	-0.87	-0.54105	SMA	2	9	0	Primary 6 or lower	0	2		1	1	0	0	0		0	1	1	-0.174549	-0.723476	0.246669	-0.385824	0.339279	-0.0083692	0.154894	-0.553966	-0.396096	1	Other
251	5.13621	1	6	-2.06	-0.87	-0.54105	SMA	2	9	0	Primary 6 or lower	0	2		1	1	0	0	0		0	1	1	2.49199	1.02982	4.24065	0.465572	1.6602	1.38326	1.06333	1.71769	0.888364	2	Other
251	5.13621	1	12	-2.06	-0.87	-0.54105	SMA	2	9	0	Primary 6 or lower	0	2		1	1	0	0	0		0	1	1																							2.58257	1.11139	2.89637	2.17668
251	5.13621	1	24	-2.06	-0.87	-0.54105	SMA	2	9	0	Primary 6 or lower	0	2		1	1	0	0	0		0	1	1																							-0.403534	-0.153869	-0.0354013	-0.741536
252	2.18754	1	0	-1.72	-2.24	-0.0479372	SMA	2	9	0	Primary 6 or lower	0	2		0	1	0	0	0	0	1	1	1	-0.164517	-0.522398	0.0742031	-0.311529	0.252938	-1.16944	-1.12893	-0.699995	0.308556	1	Mother
252	2.18754	1	6	-1.72	-2.24	-0.0479372	SMA	2	9	0	Primary 6 or lower	0	2		0	1	0	0	0	0	1	1	1	1.01273	0.225749	3.28777	-0.755887	0.267368	-0.736227	-0.775986	-0.226166	-0.209002	2	Mother
252	2.18754	1	12	-1.72	-2.24	-0.0479372	SMA	2	9	0	Primary 6 or lower	0	2		0	1	0	0	0	0	1	1	1	-0.0417641	-0.698448	1.43464	-0.336708	-0.371004	-0.181205	-0.282177	0.24834	-0.724255	1	Mother
252	2.18754	1	24	-1.72	-2.24	-0.0479372	SMA	2	9	0	Primary 6 or lower	0	2		0	1	0	0	0	0	1	1	1	-0.292258	-0.875803	0.0638982	-0.36168	0.31122	-0.152196	0.00825593	-0.601422	-0.55741	1	Mother	-0.594978	0.195576	-0.905837	-1.35073	-0.456064	-1.2858	-1.21496	-0.0891963	0.341267	1	Mother
255	3.34565	1	0	1.66	0.4	0.846043	CM	1	11	1	Secondary or higher	0	2		1	1	2	1	0	0	2	0	0	2.83157	2.34093	1.07499	2.25094	2.57306	1.75863	1.40733	2.05389	1.10403	2	Mother
255	3.34565	1	6	1.66	0.4	0.846043	CM	1	11	1	Secondary or higher	0	2		1	1	2	1	0	0	2	0	0	-0.207863	0.0775538	-0.387668	0.510342	-0.678044	1.23631	1.34649	0.281424	0.589242	1	Mother
255	3.34565	1	12	1.66	0.4	0.846043	CM	1	11	1	Secondary or higher	0	2		1	1	2	1	0	0	2	0	0	-0.0229117	0.156329	0.0967969	-0.366026	-0.0103308	0.951441	1.14479	-0.143457	0.672664	1	Mother
255	3.34565	1	24	1.66	0.4	0.846043	CM	1	11	1	Secondary or higher	0	2		1	1	2	1	0	0	2	0	0	0.472416	0.650522	-0.491969	0.0406673	0.998815	0.263594	0.0492251	0.805013	-0.359686	1	Mother	-0.192119	-0.300195	-0.220187	-0.04504	-0.127956	0.19537	-0.235456	-0.339163	-0.239693	1	Mother
258	2.25599	2	0	0.21	0.48	-0.842027		3	7	1	Primary 7		2	1										-0.146118	-0.122389	-0.442846	-1.47117	1.21456	0.526655	0.128749	1.58556	0.0849087	2	Mother
258	2.25599	2	6	0.21	0.48	-0.842027		3	7	1	Primary 7		2	1										-1.32469	-0.711682	-1.12613	-1.48394	-0.730219	-0.35532	-0.487577	0.26238	0.170175	2	Mother
258	2.25599	2	12	0.21	0.48	-0.842027		3	7	1	Primary 7		2	1										-0.0206744	0.0399476	0.921774	-0.201081	-0.715147	0.0811846	0.0074889	0.287871	0.256823	1	Mother
258	2.25599	2	24	0.21	0.48	-0.842027		3	7	1	Primary 7		2	1
264	3.93977	2	0	-0.58	-1.04	0.49927	CM	1	8	1	Not known	1	2		1	1	1	1	1	0	2	1	1	0.308872	1.14998	-0.121691	0.214166	-0.369145	-0.418118	-0.307422	-0.578161	1.5694	2	Mother
264	3.93977	2	6	-0.58	-1.04	0.49927	CM	1	8	1	Not known	1	2		1	1	1	1	1	0	2	1	1	0.254072	-0.434883	0.765774	0.631897	-0.026029	0.265283	-0.0823484	1.24746	0.463305	1	Mother
264	3.93977	2	12	-0.58	-1.04	0.49927	CM	1	8	1	Not known	1	2		1	1	1	1	1	0	2	1	1	-0.553275	-0.355673	-0.698969	1.05128	-1.31784	-0.0191762	-0.422397	1.27214	1.14771	1	Mother
264	3.93977	2	24	-0.58	-1.04	0.49927	CM	1	8	1	Not known	1	2		1	1	1	1	1	0	2	1	1																							-1.27449	-0.897686	-1.35548	-0.777782
265	2.71595	2	0	-2.26	-0.29	-0.577331		3	8	0	Secondary or higher		2	1										-1.45449	-1.38889	-0.745062	-0.61888	-1.38478	0.356192	0.0603678	1.15892	0.162339	1	Mother
265	2.71595	2	6	-2.26	-0.29	-0.577331		3	8	0	Secondary or higher		2	1										0.219077	-0.305837	1.29866	-0.631297	0.262653	-0.408088	-0.835587	1.18333	0.245301	1	Mother
265	2.71595	2	12	-2.26	-0.29	-0.577331		3	8	0	Secondary or higher		2	1										-0.458474	0.115676	-0.937093	-0.645025	-0.0479951	-0.206562	-0.335912	0.311463	0.337019	1	Mother
265	2.71595	2	24	-2.26	-0.29	-0.577331		3	8	0	Secondary or higher		2	1										-0.679709	-1.36343	0.467214	0.187884	-0.991804	-0.980051	-0.841631	-0.975924	-0.657076	7	Mother	0.129729	-0.0583864	0.442549	0.00529535	0.612629	-0.151999	0.136972	0.432285	-0.287879	1	Mother
276	4.58042	2	0	-0.3	-1.57	1.88636	SMA	2	7	1	Primary 6 or lower	0	2		0	1	0	0	0	0	1	1	1	2.49692	1.92163	0.780396	1.92579	2.58903	0.636039	0.623217	0.352411	4.67984	2	Mother
276	4.58042	2	6	-0.3	-1.57	1.88636	SMA	2	7	1	Primary 6 or lower	0	2		0	1	0	0	0	0	1	1	1	0.325706	0.997435	-0.292835	0.617203	-0.335555	0.233063	0.145658	0.377495	2.36303	1	Mother
276	4.58042	2	12	-0.3	-1.57	1.88636	SMA	2	7	1	Primary 6 or lower	0	2		0	1	0	0	0	0	1	1	1	0.513012	0.409448	-0.584607	1.46812	0.33272	0.190568	0.0856567	0.402986	0.648124	1	Mother
276	4.58042	2	24	-0.3	-1.57	1.88636	SMA	2	7	1	Primary 6 or lower	0	2		0	1	0	0	0	0	1	1	1																							0.00419657	-0.277992	0.790905	-0.377265
277	3.71253	2	0	0.88	0.64	-0.02089		3	7	1	Primary 7		2	0										-0.0912803	-0.225757	-0.165034	0.219892	-0.0491977	0.865022	0.351638	2.10712	0.330106	2	Mother
277	3.71253	2	6	0.88	0.64	-0.02089		3	7	1	Primary 7		2	0										-0.773539	-0.145241	-0.848319	0.20713	-1.34077	-0.974952	-0.958522	-0.564331	0.415371	1	Mother
277	3.71253	2	12	0.88	0.64	-0.02089		3	7	1	Primary 7		2	0										-0.586233	-0.398324	-0.360199	-0.23778	-0.672498	-0.658197	-0.602223	-0.538841	-0.699018	1	Mother
277	3.71253	2	24	0.88	0.64	-0.02089		3	7	1	Primary 7		2	0
279	4.11773	1	0	-0.08	-1.99	0.152497	CM	1	7	0	Primary 6 or lower	0	2		0	1	1	1	1	0	2	1	1	-1.29229	-1.55519	-0.727482	-0.360162	-0.996949	-0.640236	-0.833563	0.29444	4.83712	1	Other
279	4.11773	1	6	-0.08	-1.99	0.152497	CM	1	7	0	Primary 6 or lower	0	2		0	1	1	1	1	0	2	1	1	0.264595	0.877057	1.32773	-0.374097	-0.980756	-0.0782281	-0.193864	0.321829	4.3297	1	Other
279	4.11773	1	12	-0.08	-1.99	0.152497	CM	1	7	0	Primary 6 or lower	0	2		0	1	1	1	1	0	2	1	1	-0.294929	-1.3885	0.252413	0.0453582	0.340161	0.47515	0.437036	0.346371	0.810011	1	Other
279	4.11773	1	24	-0.08	-1.99	0.152497	CM	1	7	0	Primary 6 or lower	0	2		0	1	1	1	1	0	2	1	1																							0.0498793	0.484863	0.348541	-0.792024
280	3.15948	2	0	0.09	-0.86	2.40652	SMA	2	21	0	Secondary or higher	0	2		1	1	0	0	1	0	1	1	1	0.957499	0.691042	1.67921	-0.630056	0.914413	1.97951	1.65468	2.07973	-0.964033	2	Other
280	3.15948	2	6	0.09	-0.86	2.40652	SMA	2	21	0	Secondary or higher	0	2		1	1	0	0	1	0	1	1	1	-0.469908	-0.903834	0.21499	-0.64268	-0.0507208	-0.699533	-0.627691	-0.591992	-0.879689	1	Other
280	3.15948	2	12	0.09	-0.86	2.40652	SMA	2	21	0	Secondary or higher	0	2		1	1	0	0	1	0	1	1	1	-0.771185	-1.14691	-0.844663	-0.225294	-0.0338052	0.105673	0.570847	-1.46223	-0.78244	1	Other
280	3.15948	2	24	0.09	-0.86	2.40652	SMA	2	21	0	Secondary or higher	0	2		1	1	0	0	1	0	1	1	1	-0.902308	-0.325643	-0.272991	-1.54512	-0.65911	0.00917844	-0.115955	0.382647	-0.622048	1	Other	-0.175999	0.370396	-0.234166	-0.937129	0.243907	-1.1729	-0.639653	-0.450395	0.746911	2	Other
282	7.00068	1	0	0.77	-0.42	-0.361793	CM	1	8	1	Not known	0	2		1	0	1	1	0	0	2	0	1																							1.33359	0.788381	2.50444	-0.00868277
282	7.00068	1	6	0.77	-0.42	-0.361793	CM	1	8	1	Not known	0	2		1	0	1	1	0	0	2	0	1																							-0.238167	-0.784572	0.402584	0.0171736
282	7.00068	1	12	0.77	-0.42	-0.361793	CM	1	8	1	Not known	0	2		1	0	1	1	0	0	2	0	1																							-1.17695	-1.41738	-0.425907	-0.699213
282	7.00068	1	24	0.77	-0.42	-0.361793	CM	1	8	1	Not known	0	2		1	0	1	1	0	0	2	0	1																							-0.203787	-0.177149	0.467785	-0.64369
283	4.80219	1	0	-1.02	-0.62	-0.714437		3	6	1	Primary 7		2	0										1.27337	1.23285	0.18296	0.486474	1.6359	-0.896752	-0.590055	-1.46935	0.748712	1	Mother
283	4.80219	1	6	-1.02	-0.62	-0.714437		3	6	1	Primary 7		2	0										0.713849	0.976722	-0.502413	0.473988	0.997212	0.135626	0.0408459	0.352879	-0.368904	1	Mother
283	4.80219	1	12	-1.02	-0.62	-0.714437		3	6	1	Primary 7		2	0										-0.585108	-0.612495	0.37983	-1.2673	-0.293481	0.0964191	0.26173	-0.51939	-0.278568	1	Mother
283	4.80219	1	24	-1.02	-0.62	-0.714437		3	6	1	Primary 7		2	0																																-0.569016	-0.776542	-0.473605	-0.0165758
287	6.73511	1	0	-0.19	-0.62	0.552791	SMA	2	7	1	Secondary or higher	0	2		0	1	0	0	1	0	0	1	1																							0.0618201	-0.148559	-0.477871	0.720088
287	6.73511	1	6	-0.19	-0.62	0.552791	SMA	2	7	1	Secondary or higher	0	2		0	1	0	0	1	0	0	1	1																							-0.0860104	-0.154419	0.390987	-0.368237
287	6.73511	1	12	-0.19	-0.62	0.552791	SMA	2	7	1	Secondary or higher	0	2		0	1	0	0	1	0	0	1	1																							-0.54923	-0.787648	0.412976	-0.711869
287	6.73511	1	24	-0.19	-0.62	0.552791	SMA	2	7	1	Secondary or higher	0	2		0	1	0	0	1	0	0	1	1																							-0.528175	-0.172745	-0.396151	-0.662198
290	2.64476	2	0	-0.08	-1.48	0.21676	CM	1	11	0	Primary 7	1	2		1	1	0	1	0	0	2	1	1	-1.21508	-1.0653	-1.14858	-0.617087	-0.733666	0.704758	0.743309	0.256549	-1.05068	1	Mother
290	2.64476	2	6	-0.08	-1.48	0.21676	CM	1	11	0	Primary 7	1	2		1	1	0	1	0	0	2	1	1	-0.533471	-0.651186	-1.05354	-0.629642	0.58733	-0.178451	-0.0130404	-0.617618	-0.966799	1	Mother
290	2.64476	2	12	-0.08	-1.48	0.21676	CM	1	11	0	Primary 7	1	2		1	1	0	1	0	0	2	1	1	-0.967907	-0.90601	-0.567513	-0.642335	-0.704325	-0.102839	-0.213485	0.306175	-0.881994	1	Mother
290	2.64476	2	24	-0.08	-1.48	0.21676	CM	1	11	0	Primary 7	1	2		1	1	0	1	0	0	2	1	1	-1.21739	-1.08206	-0.376909	-0.667514	-1.32827	-0.312097	-0.476863	0.355665	-0.713766	1	Mother	0.993234	0.751126	0.839901	0.521009	1.58568	1.37116	-0.17319	0.956024	0.568075	1	Mother
291	5.31143	1	0	-2.03	-1.45	0.672657	CM	1	7	1	Primary 7	0	2		1	1	0	1	1	0	2	0	0	1.21185	1.3138	1.44993	0.0417021	0.671011	2.17343	1.98568	1.70182	0.23392	2	Mother
291	5.31143	1	6	-2.03	-1.45	0.672657	CM	1	7	1	Primary 7	0	2		1	1	0	1	1	0	2	0	0	-0.580399	-0.271498	-0.392751	-0.404381	-0.61896	0.820671	1.1002	-0.517492	0.328404	1	Other
291	5.31143	1	12	-2.03	-1.45	0.672657	CM	1	7	1	Primary 7	0	2		1	1	0	1	1	0	2	0	0																							-0.896173	-0.770585	-0.493734	-0.783587
291	5.31143	1	24	-2.03	-1.45	0.672657	CM	1	7	1	Primary 7	0	2		1	1	0	1	1	0	2	0	0																							-0.558402	-0.155779	-0.453476	-0.733507
302	4.16701	1	0	-2.82	0.03	-1.2346		3	7	0	Not known		1	1										-0.417683	-0.877544	0.451755	-0.361404	-0.342304	-1.11184	-0.826022	-1.50081	0.641784
302	4.16701	1	6	-2.82	0.03	-1.2346		3	7	0	Not known		1	1										1.99834	1.54251	3.27224	1.35436	-0.00175273	0.276912	-0.475588	2.56758	0.72198	2	Mother
302	4.16701	1	12	-2.82	0.03	-1.2346		3	7	0	Not known		1	1										1.06759	0.952785	1.80854	0.045841	0.3396	0.232774	-0.120964	1.24427	0.806785	1	Other
302	4.16701	1	24	-2.82	0.03	-1.2346		3	7	0	Not known		1	1																																-0.741939	-0.768318	-0.501392	-0.422127
303	10.5462	2	0	0.55	-0.54	1.01008	SMA	2	15	1	Secondary or higher	0	1		0	1	0	0	0	0	1	1	1																							1.19522	0.302072	0.0994902	2.41573
303	10.5462	2	6	0.55	-0.54	1.01008	SMA	2	15	1	Secondary or higher	0	1		0	1	0	0	0	0	1	1	1																							-0.376995	-0.957262	0.54393	-0.156397
303	10.5462	2	12	0.55	-0.54	1.01008	SMA	2	15	1	Secondary or higher	0	1		0	1	0	0	0	0	1	1	1																							1.05795	0.290286	0.56384	1.7233
303	10.5462	2	24	0.55	-0.54	1.01008	SMA	2	15	1	Secondary or higher	0	1		0	1	0	0	0	0	1	1	1																							-0.66135	-1.60205	-0.244084	0.66151
305	9.97947	1	0	-0.39	-1.13	-0.514224	CM	1	8	1	Primary 7	0	1		1	1	1	1	0	0	2	1	1																							2.02943	0.126433	4.32158	0.881351
305	9.97947	1	6	-0.39	-1.13	-0.514224	CM	1	8	1	Primary 7	0	1		1	1	1	1	0	0	2	1	1																							1.09036	-0.819573	4.76613	-0.577688
305	9.97947	1	12	-0.39	-1.13	-0.514224	CM	1	8	1	Primary 7	0	1		1	1	1	1	0	0	2	1	1																							1.57602	-0.198939	3.51311	0.931839
305	9.97947	1	24	-0.39	-1.13	-0.514224	CM	1	8	1	Primary 7	0	1		1	1	1	1	0	0	2	1	1																							-0.609841	-1.46918	0.173659	0.260496
306	3.40041	1	0	0.37	-0.78	-0.54105	SMA	2	7	0	Secondary or higher	1	2		0	1	0	0	0	0	0	1	1	0.232627	0.00530761	-0.864299	0.521794	0.941655	-0.0294021	0.166803	-0.639929	1.71377	1	Other
306	3.40041	1	6	0.37	-0.78	-0.54105	SMA	2	7	0	Secondary or higher	1	2		0	1	0	0	0	0	0	1	1	0.16942	0.418986	-0.769781	0.509308	0.302963	0.763476	0.52017	1.1823	1.19667	1	Other
306	3.40041	1	12	0.37	-0.78	-0.54105	SMA	2	7	0	Secondary or higher	1	2		0	1	0	0	0	0	0	1	1	-0.384724	-0.834892	-0.666907	0.0637767	0.318756	1.20368	1.43531	-0.139254	0.686952	1	Other
306	3.40041	1	24	0.37	-0.78	-0.54105	SMA	2	7	0	Secondary or higher	1	2		0	1	0	0	0	0	0	1	1	-0.633536	-1.34497	-0.475258	-0.393481	0.348178	0.156994	0.0626321	0.359929	-0.344937	1	Other	0.89218	1.25301	0.536845	0.494134	0.323366	0.224536	0.6294	0.640143	1.39988	1	Other
307	2.8282	2	0	0.55	0.03	-0.312634	SMA	2	10	0	Secondary or higher	0	2		1	1	0	0	1	1	1	1	1	-0.572147	-0.701236	-1.1136	-0.621709	0.578111	-0.944207	-0.893823	-0.633211	0.181236	1	Other
307	2.8282	2	6	0.55	0.03	-0.312634	SMA	2	10	0	Secondary or higher	0	2		1	1	0	0	1	1	1	1	1	-0.759097	-0.956931	-1.01856	-0.202322	-0.0605013	-1.58792	-1.37264	-1.50738	0.265119	1	Other
307	2.8282	2	12	0.55	0.03	-0.312634	SMA	2	10	0	Secondary or higher	0	2		1	1	0	0	1	1	1	1	1	-1.43967	-1.87895	-0.919338	-0.64737	-0.698472	-0.31234	-0.460434	0.316073	0.35269	1	Mother
307	2.8282	2	24	0.55	0.03	-0.312634	SMA	2	10	0	Secondary or higher	0	2		1	1	0	0	1	1	1	1	1	-0.448365	-0.38048	-0.338788	-0.672549	-0.0160079	-0.641348	-0.307512	-1.43213	-0.0796022	1	Other	-0.200014	-0.343558	-0.450074	0.337831	-0.706157	0.892604	-0.113554	-0.246233	-0.332813	1	Other
308	4.03012	1	0	-0.72	-3.62	-0.02089	CM	1	9	0	Secondary or higher	0	2		1	1	1	1	0	0	2	0	0	0.185899	0.440312	-0.744193	0.505927	0.306891	0.304613	0.263166	0.290101	0.0182203	1	Mother
308	4.03012	1	6	-0.72	-3.62	-0.02089	CM	1	9	0	Secondary or higher	0	2		1	1	1	1	0	0	2	0	0	-0.00138779	-0.150722	-0.649674	0.493441	0.321401	0.857991	0.616532	1.21349	1.9032	1	Mother
308	4.03012	1	12	-0.72	-3.62	-0.02089	CM	1	9	0	Secondary or higher	0	2		1	1	1	1	0	0	2	0	0	-0.18632	-0.738709	-0.5515	0.480473	0.336473	0.216748	-0.137304	1.23898	1.98985	1	Mother
308	4.03012	1	24	-0.72	-3.62	-0.02089	CM	1	9	0	Secondary or higher	0	2		1	1	1	1	0	0	2	0	0																							2.42124	1.73983	3.3151	0.685522
310	3.94524	1	0	-1.14	-1.85	-1.2346	CM	1	11	0	Secondary or higher	0	2		0	1	0	1	0	1	2	0	0	0.175473	-0.242988	0.799403	-0.355816	0.304406	-0.905625	-0.859958	-0.612947	-0.596586	1	Mother
310	3.94524	1	6	-1.14	-1.85	-1.2346	CM	1	11	0	Secondary or higher	0	2		0	1	0	1	0	1	2	0	0	0.732663	-0.164213	0.11403	2.22334	0.318916	-0.950995	-0.784125	-1.03783	-0.513164	1	Mother
310	3.94524	1	12	-1.14	-1.85	-1.2346	CM	1	11	0	Secondary or higher	0	2		0	1	0	1	0	1	2	0	0	-0.692391	-1.42114	-0.566644	0.482473	-0.319055	-1.11242	-0.843288	-1.46149	-0.425594	1	Mother
310	3.94524	1	24	-1.14	-1.85	-1.2346	CM	1	11	0	Secondary or higher	0	2		0	1	0	1	0	1	2	0	0	-0.0733199	-0.592475	-0.37604	0.457294	0.36341	-0.962426	-0.829133	-0.962575	-0.257367	1	Mother	0.597652	0.98	-0.177298	0.551575	-0.385014	0.942793	0.155584	0.810133	0.926304	1	Mother
311	7.80835	1	0	-0.19	-1.24	0.0954987	CM	1	9	1	Secondary or higher	0	2		0	0	0	1	0	0	2	0	0																							-1.18174	-1.41469	-0.434987	-0.710509
311	7.80835	1	6	-0.19	-1.24	0.0954987	CM	1	9	1	Secondary or higher	0	2		0	0	0	1	0	0	2	0	0																							-0.854755	-1.42055	0.433872	-0.685877
311	7.80835	1	12	-0.19	-1.24	0.0954987	CM	1	9	1	Secondary or higher	0	2		0	0	0	1	0	0	2	0	0																							-0.527367	-0.173199	-0.394619	-0.660293
311	7.80835	1	24	-0.19	-1.24	0.0954987	CM	1	9	1	Secondary or higher	0	2		0	0	0	1	0	0	2	0	0																							-0.822855	-0.811737	-0.354689	-0.610621
312	3.58932	2	0	-3.62	-0.07	-0.887823	CM	1	9	0	Primary 7	0	2		1	0	5	1	1	1	2	1	1	0.0176651	0.0895625	0.591359	-0.640886	-0.0528052	0.367531	0.332785	0.303328	-0.891672	1	Mother
312	3.58932	2	6	-3.62	-0.07	-0.887823	CM	1	9	0	Primary 7	0	2		1	0	5	1	1	1	2	1	1	1.56749	1.17305	1.07582	0.21051	1.92131	-0.156839	0.269851	-1.46982	2.19434	1	Mother
312	3.58932	2	12	-3.62	-0.07	-0.887823	CM	1	9	0	Primary 7	0	2		1	0	5	1	1	1	2	1	1	0.267188	-0.752813	0.00624821	1.06115	0.630301	0.0418102	-0.0660087	0.353902	0.48128	1	Mother
312	3.58932	2	24	-3.62	-0.07	-0.887823	CM	1	9	0	Primary 7	0	2		1	0	5	1	1	1	2	1	1	-0.478951	-0.929298	0.19633	-0.691727	0.00627887	0.31114	0.225262	0.403257	-0.551992	1	Mother	0.870638	0.643195	1.22313	0.353682	1.6407	0.0558056	0.532913	1.27006	0.239183	1	Mother
314	4.19713	2	0	-2.37	-1.28	0.846043	SMA	2	15	0	Secondary or higher	0	1		0	1	0	0	1	0	1	1	1	-0.528071	-0.483627	-0.852496	0.639623	-0.688211	-0.97824	-0.961874	-0.565416	-0.789353	1	Mother
314	4.19713	2	6	-2.37	-1.28	0.846043	SMA	2	15	0	Secondary or higher	0	1		0	1	0	0	1	0	1	1	1	-0.585897	-0.397889	-0.749622	0.194092	-0.672418	-0.777536	-0.740571	-0.538705	-0.698557	1	Mother
314	4.19713	2	12	-2.37	-1.28	0.846043	SMA	2	15	0	Secondary or higher	0	1		0	1	0	0	1	0	1	1	1	-0.141352	0.0305871	-0.247403	1.47508	-1.30838	-1.04843	-1.06679	-0.509553	-0.599464	1	Mother
314	4.19713	2	24	-2.37	-1.28	0.846043	SMA	2	15	0	Secondary or higher	0	1		0	1	0	0	1	0	1	1	1																							-0.318173	-0.901442	1.20438	-0.761996
315	3.49624	1	0	-0.56	-1.25	-0.714437	CM	1	11	0	Secondary or higher	0	2		1	1	0	1	1	0	2	1	1	-0.624158	-0.984172	-0.0661302	-0.344503	-0.361945	-0.374269	-0.3736	-0.185761	-0.672173	1	Mother
315	3.49624	1	6	-0.56	-1.25	-0.714437	CM	1	11	0	Secondary or higher	0	2		1	1	0	1	1	0	2	1	1	-0.563286	-0.570493	-0.751503	0.074952	-0.347434	-0.419639	-0.575301	0.288203	0.0117678	1	Mother
315	3.49624	1	12	-0.56	-1.25	-0.714437	CM	1	11	0	Secondary or higher	0	2		1	1	0	1	1	0	2	1	1	-1.24353	-1.49208	-0.651763	-1.23405	-0.332122	-0.341151	-0.356512	-0.135322	-0.50072	1	Mother
315	3.49624	1	24	-0.56	-1.25	-0.714437	CM	1	11	0	Secondary or higher	0	2		1	1	0	1	1	0	2	1	1	-0.128138	-0.328512	-0.461159	0.0365972	0.350342	-0.31091	0.0739441	-1.4341	-0.332493	1	Mother	0.699934	0.929829	0.679129	0.393321	0.344016	-0.295943	0.861135	1.29808	0.618738	1	Mother
317	1.82615	2	0	-1.71	-2.03	-0.312634	SMA	2	15	0	Secondary or higher	0	1		1	1	0	0	1	0	1	1	1	-1.06747	-0.190718	-1.30472	-1.0284	-0.757636	0.222639	0.479272	-0.682836	1.21359	1	Mother
317	1.82615	2	6	-1.71	-2.03	-0.312634	SMA	2	15	0	Secondary or higher	0	1		1	1	0	0	1	0	1	1	1	0.234528	-0.111508	-0.819737	1.11875	0.56336	0.656678	0.416757	1.13953	0.0964311	1	Mother
317	1.82615	2	12	-1.71	-2.03	-0.312634	SMA	2	15	0	Secondary or higher	0	1		1	1	0	0	1	0	1	1	1	1.66095	0.972849	0.83561	1.10612	1.88444	2.04913	1.74233	2.06319	0.781294	2	Mother
317	1.82615	2	24	-1.71	-2.03	-0.312634	SMA	2	15	0	Secondary or higher	0	1		1	1	0	0	1	0	1	1	1	1.03922	2.13642	-0.923516	1.08095	0.607292	1.60037	1.75649	0.314988	0.349002	7	Mother	0.00962726	0.326583	-0.238639	-0.532413	0.289111	0.00755684	-0.837629	0.370728	0.298472	1	Mother
318	10.9541	2	0	-0.79	-0.85	0.40036		3	7	1	Secondary or higher		2	1																																1.8369	-0.0161127	5	-0.160888
318	10.9541	2	6	-0.79	-0.85	0.40036		3	7	1	Secondary or higher		2	1																																0.421861	-0.33475	0.98268	0.603265
318	10.9541	2	12	-0.79	-0.85	0.40036		3	7	1	Secondary or higher		2	1																																-0.0413584	-0.967979	0.58014	0.630619
318	10.9541	2	24	-0.79	-0.85	0.40036		3	7	1	Secondary or higher		2	1																																-0.0203035	-0.0397163	0.620071	-0.432667
320	1.87269	2	0	-1.56	-1.09	2.33433		3	10	0	Secondary or higher		1	1
320	1.87269	2	6	-1.56	-1.09	2.33433		3	10	0	Secondary or higher		1	1										1.61723	1.92098	2.32751	0.251211	0.241007	-0.75854	-0.948708	0.247872	-1.08018	2	Mother
320	1.87269	2	12	-1.56	-1.09	2.33433		3	10	0	Secondary or higher		1	1										-0.67033	-0.33282	-0.683442	0.668803	-1.37532	-1.15206	-1.69416	1.17492	-0.984313	1	Mother
320	1.87269	2	24	-1.56	-1.09	2.33433		3	10	0	Secondary or higher		1	1										-1.42151	-1.18564	-0.891139	-0.651096	-1.34735	-1.6074	-1.40918	-1.47429	-0.82346	1	Mother	-1.30591	-1.13024	-1.29238	-1.10735	-1.15744	-0.753565	-1.20633	-0.524478	-1.25663	1	Mother
321	5.03491	1	0	-0.85	-2.4	-0.714437	SMA	2	11	1	Primary 7	1	1		1	1	0	0	0	0	0	1	1	-0.311072	-0.0697709	-0.552544	-0.383272	0.00971129	-0.742073	-0.415675	-1.45783	-0.41315	1
321	5.03491	1	6	-0.85	-2.4	-0.714437	SMA	2	11	1	Primary 7	1	1		1	1	0	0	0	0	0	1	1	-0.498022	0.00943884	-0.457504	-0.395827	-0.628901	-0.787032	-0.894491	-0.0848828	-0.329266	1	Mother
321	5.03491	1	12	-0.85	-2.4	-0.714437	SMA	2	11	1	Primary 7	1	1		1	1	0	0	0	0	0	1	1																							2.26291	0.486418	2.46593	2.54031
321	5.03491	1	24	-0.85	-2.4	-0.714437	SMA	2	11	1	Primary 7	1	1		1	1	0	0	0	0	0	1	1																							-0.406649	0.4746	-0.890366	-0.748885
322	2.49144	2	0	-0.59	-0.94	-0.312634	CM	1	8	0	Secondary or higher	1	1		1	1	3	1	0	0	2	1	1	0.379122	-0.0849601	1.94174	-0.613224	-0.0849527	0.921245	1.27492	-0.649888	-1.07649	1	Mother
322	2.49144	2	6	-0.59	-0.94	-0.312634	CM	1	8	0	Secondary or higher	1	1		1	1	3	1	0	0	2	1	1	0.56441	0.998962	1.25689	-1.05772	0.256239	1.23553	0.934866	1.6219	-0.39209	2	Mother
322	2.49144	2	12	-0.59	-0.94	-0.312634	CM	1	8	0	Secondary or higher	1	1		1	1	3	1	0	0	2	1	1	0.872768	1.07687	2.13025	-0.206185	-0.382613	0.710343	1.00986	-0.60094	-0.910108	2	Mother
322	2.49144	2	24	-0.59	-0.94	-0.312634	CM	1	8	0	Secondary or higher	1	1		1	1	3	1	0	0	2	1	1	1.61592	1.90553	0.371128	0.632518	1.60626	0.980084	0.746482	1.24624	2.26071	7	Mother	1.48079	1.27335	1.03895	1.60502	0.685327	2.13319	1.03505	0.901448	1.31866	1	Mother
323	9.56331	1	0	-2.46	-1.6	-1.58124	CM	1	7	1	Secondary or higher	0	1		1	0	1	1	0	0	2	1	1																							-0.0368627	-0.182006	0.908724	-0.623277
323	9.56331	1	6	-2.46	-1.6	-1.58124	CM	1	7	1	Secondary or higher	0	1		1	0	1	1	0	0	2	1	1																							1.39808	1.69226	1.35316	0.143462
323	9.56331	1	12	-2.46	-1.6	-1.58124	CM	1	7	1	Secondary or higher	0	1		1	0	1	1	0	0	2	1	1																							1.72529	1.05955	2.22246	0.910609
323	9.56331	1	24	-2.46	-1.6	-1.58124	CM	1	7	1	Secondary or higher	0	1		1	0	1	1	0	0	2	1	1																							-0.786052	-0.832394	-0.284893	-0.523798
324	3.01711	2	0	-2.44	-2.06	-0.714437	SMA	2	4	0	Primary 6 or lower	0	2		1	1	0	0	0	0	1	1	1
324	3.01711	2	6	-2.44	-2.06	-0.714437	SMA	2	4	0	Primary 6 or lower	0	2		1	1	0	0	0	0	1	1	1	0.132328	0.0773764	-0.203155	-0.638954	0.924755	-0.00322485	0.182287	-0.599313	0.29646	1	Mother
324	3.01711	2	12	-2.44	-2.06	-0.714437	SMA	2	4	0	Primary 6 or lower	0	2		1	1	0	0	0	0	1	1	1	-0.91847	-0.172225	-0.880695	-0.220534	-1.34574	-0.641181	-0.568198	-0.572738	-0.814242	1	Mother
324	3.01711	2	24	-2.44	-2.06	-0.714437	SMA	2	4	0	Primary 6 or lower	0	2		1	1	0	0	0	0	1	1	1	-0.795717	-0.348274	-0.690091	-1.54154	-0.0100755	1.54456	1.3887	1.27444	-0.646015	7	Mother	0.652787	0.434033	0.338192	1.17183	-0.222712	1.50514	0.785613	0.453758	0.378016	1	Mother
325	5.00753	2	0	2.71	-1.87	-0.367663	CM	1	14	1	Secondary or higher	0	2		1	1	1	1	0	0	2	1	1	0.564112	0.64991	1.25181	-0.244678	-0.0112781	-0.976353	-0.976627	-0.525282	-0.652928		Other
325	5.00753	2	6	2.71	-1.87	-0.367663	CM	1	14	1	Secondary or higher	0	2		1	1	1	1	0	0	2	1	1
325	5.00753	2	12	2.71	-1.87	-0.367663	CM	1	14	1	Secondary or higher	0	2		1	1	1	1	0	0	2	1	1
325	5.00753	2	24	2.71	-1.87	-0.367663	CM	1	14	1	Secondary or higher	0	2		1	1	1	1	0	0	2	1	1
327	1.65092	1	0	0.06	-2.01	0.481456	SMA	2	13	0	Primary 6 or lower	0	2		0	1	0	0	0		1	1	1	-0.97491	-1.94732	-0.0281485	-0.298008	-0.415978	-0.531489	-0.933517	1.07112	2.6203
327	1.65092	1	6	0.06	-2.01	0.481456	SMA	2	13	0	Primary 6 or lower	0	2		0	1	0	0	0		1	1	1
327	1.65092	1	12	0.06	-2.01	0.481456	SMA	2	13	0	Primary 6 or lower	0	2		0	1	0	0	0		1	1	1
327	1.65092	1	24	0.06	-2.01	0.481456	SMA	2	13	0	Primary 6 or lower	0	2		0	1	0	0	0		1	1	1
329	1.93566	1	0	0.51	-0.25	1.27555	CM	1	9	0	Secondary or higher	1	1		1	1	0	1	1	0	3	1	1	-1.68441	-1.90205	-1.14368	-0.737124	-1.06084	-0.488752	-0.612411	0.186376	-0.334365	3	Mother
329	1.93566	1	6	0.51	-0.25	1.27555	CM	1	9	0	Secondary or higher	1	1		1	1	0	1	1	0	3	1	1	0.117945	0.526706	-0.652424	0.113376	0.261115	0.189719	0.440237	-0.686165	0.355567	1	Mother
329	1.93566	1	12	0.51	-0.25	1.27555	CM	1	9	0	Secondary or higher	1	1		1	1	0	1	1	0	3	1	1	-0.183668	0.283198	-0.542762	0.0988893	-0.375253	0.874764	0.666987	1.14	1.65339	1	Mother
329	1.93566	1	24	0.51	-0.25	1.27555	CM	1	9	0	Secondary or higher	1	1		1	1	0	1	1	0	3	1	1	0.0631647	0.107149	-0.742104	-0.358231	0.960415	-0.172743	-0.0126924	-0.608201	-0.580455	1	Mother	0.678102	0.378217	1.01227	0.50612	0.999664	0.303886	0.631298	0.816746	0.135251	1	Mother
330	2.987	1	0	0.11	-1.92	2.33433	CM	1	9	0	Secondary or higher	1	1		0	1	1	1	1	0	2	1	1	-0.438553	-0.395315	-0.16326	-0.331672	-0.376856	-1.52845	-1.56166	-0.660403	0.443138	1	Mother
330	2.987	1	6	0.11	-1.92	2.33433	CM	1	9	0	Secondary or higher	1	1		0	1	1	1	1	0	2	1	1	2.72464	2.02822	3.05135	0.519655	2.25055	0.222837	0.457325	-0.635726	1.12754	2	Mother
330	2.987	1	12	0.11	-1.92	2.33433	CM	1	9	0	Secondary or higher	1	1		0	1	1	1	1	0	2	1	1	1.41997	0.431608	2.75488	0.507307	0.631889	0.895143	0.948621	0.287389	0.609521	2	Mother
330	2.987	1	24	0.11	-1.92	2.33433	CM	1	9	0	Secondary or higher	1	1		0	1	1	1	1	0	2	1	1	1.6668	0.590462	2.55553	0.914069	0.987752	-0.391864	-0.424893	-0.112543	0.177229	7	Mother	0.157939	-0.0908271	0.532627	0.0750313	0.620195	-0.202949	0.280841	0.171156	-0.202628	1	Mother
331	2.51335	1	0	-1.16	-2.5	-0.577331	SMA	2	7	0	Primary 7	0	1		0	1	0	0	1	0	1	1	1	-0.372655	0.199201	-1.03349	-0.319738	-0.0641237	0.795454	1.14119	-0.68386	0.363403	1	Other
331	2.51335	1	6	-1.16	-2.5	-0.577331	SMA	2	7	0	Primary 7	0	1		0	1	0	0	1	0	1	1	1	-0.685367	-1.06338	-0.941063	-0.331948	0.276668	1.22744	1.07658	1.13783	-0.756056	1	Other
331	2.51335	1	12	-1.16	-2.5	-0.577331	SMA	2	7	0	Primary 7	0	1		0	1	0	0	1	0	1	1	1	-0.736803	-1.30428	-0.438321	0.0850926	-0.359219	0.597701	0.334479	1.16712	1.14505	1	Other
331	2.51335	1	24	-1.16	-2.5	-0.577331	SMA	2	7	0	Primary 7	0	1		0	1	0	0	1	0	1	1	1	-0.494342	-0.146369	-0.644452	0.492752	-0.984203	0.143601	-0.21188	1.21484	0.106251	1	Other	-0.172327	0.452995	-0.559543	-0.709616	-0.351284	-0.615852	-0.68368	0.984051	0.142222	1	Other
332	2.36824	1	0	1.22	-2.01	2.06964	CM	1	12	0	Primary 7	0	1		0	1	1	1	0	0	2	1	1	-1.25904	-1.16348	-1.06117	-0.316082	-1.04818	1.01317	1.11899	0.207799	1.54001	1	Mother
332	2.36824	1	6	1.22	-2.01	2.06964	CM	1	12	0	Primary 7	0	1		0	1	1	1	0	0	2	1	1	0.307269	0.611139	-0.941063	0.531934	0.603269	1.70644	1.63165	1.13783	-0.155538	1	Mother
332	2.36824	1	12	1.22	-2.01	2.06964	CM	1	12	0	Primary 7	0	1		0	1	1	1	0	0	2	1	1	-0.0225944	0.665976	0.294572	-0.772581	-0.366434	2.23721	2.10074	1.60434	0.503054	2	Mother
332	2.36824	1	24	1.22	-2.01	2.06964	CM	1	12	0	Primary 7	0	1		0	1	1	1	0	0	2	1	1	-0.508131	-0.834022	-0.665862	-0.368302	0.318916	1.80325	1.71368	1.20928	-0.513164	1	Mother	0.668206	0.87877	1.12085	0.0127364	0.897904	-1.19831	0.96025	1.58115	0.427539	1	Mother
333	1.82888	1	0	-4.52	-3.13	-0.577331	SMA	2	7	0	Primary 7	0	1		1	1	0	0	1	0	1	1	1	0.411823	-0.579412	1.95552	-0.302492	0.242436	1.41122	1.59152	0.181088	1.44922	1	Mother
333	1.82888	1	6	-4.52	-3.13	-0.577331	SMA	2	7	0	Primary 7	0	1		1	1	0	0	1	0	1	1	1	0.715809	0.497547	2.04221	-0.313943	-0.0708579	0.401686	0.412166	0.203595	0.324687	1	Mother
333	1.82888	1	12	-4.52	-3.13	-0.577331	SMA	2	7	0	Primary 7	0	1		1	1	0	0	1	0	1	1	1	1.15296	0.581544	2.53294	0.104684	0.271216	1.07975	1.18686	0.229764	-0.787397	1	Mother
333	1.82888	1	24	-4.52	-3.13	-0.577331	SMA	2	7	0	Primary 7	0	1		1	1	0	0	1	0	1	1	1	0.534259	0.0745073	0.778515	-1.21694	1.6076	1.47293	1.62109	0.280474	-0.615022	7	Mother	0.54274	-0.283447	1.0787	1.06844	0.728878	1.05316	0.989384	0.11586	-0.415395	1	Mother
334	4.37782	1	0	-1.11	-1.7	0.672657	CM	1	8	0	Primary 6 or lower	0	2		1	1	0	1	0	0	2	1	1	-0.888104	-1.51384	-0.287927	-1.2306	0.317072	-0.122198	0.177607	-1.04095	0.677273	1	Other
334	4.37782	1	6	-1.11	-1.7	0.672657	CM	1	8	0	Primary 6 or lower	0	2		1	1	0	1	0	0	2	1	1	-0.446586	0.250336	-0.180353	-0.380926	-0.972819	-0.995544	-0.984988	-0.563592	-0.42882	1	Other
334	4.37782	1	12	-1.11	-1.7	0.672657	CM	1	8	0	Primary 6 or lower	0	2		1	1	0	1	0	0	2	1	1	-0.88304	-1.34672	-0.477347	0.470677	-0.958549	-0.922398	-0.910412	-0.539457	-0.346781	1	Other
334	4.37782	1	24	-1.11	-1.7	0.672657	CM	1	8	0	Primary 6 or lower	0	2		1	1	0	1	0	0	2	1	1																							-0.262395	-0.144253	-0.492421	-0.0399826
335	1.81246	1	0	0.78	0.12	0.21676	SMA	2	7	0	Secondary or higher	0	1		1	1	0	0	1	0	1	1	1	0.0375669	-0.582023	0.392607	0.129863	0.241955	1.16925	1.31147	0.180274	-0.955625	1	Mother
335	1.81246	1	6	0.78	0.12	0.21676	SMA	2	7	0	Secondary or higher	0	1		1	1	0	0	1	0	1	1	1	-0.0219409	0.506251	-0.287022	-0.747264	0.257347	0.769154	0.836846	0.206307	1.53494	1	Mother
335	1.81246	1	12	0.78	0.12	0.21676	SMA	2	7	0	Secondary or higher	0	1		1	1	0	0	1	0	1	1	1	1.15699	0.921671	0.589478	1.39968	0.59878	-0.472071	-0.612081	0.231391	-0.781867	1	Mother
335	1.81246	1	24	0.78	0.12	0.21676	SMA	2	7	0	Secondary or higher	0	1		1	1	0	0	1	0	1	1	1
336	2.54073	1	0	0.72	-1.82	-0.577331	CM	1	8	0	Primary 7	1	2		0	1	1	1	1	1	2	1	1	0.127025	-0.466255	-1.02827	-0.320428	1.89629	0.799563	0.86785	0.216341	-0.833026	1	Other
336	2.54073	1	6	0.72	-1.82	-0.577331	CM	1	8	0	Primary 7	1	2		0	1	1	1	1	1	2	1	1	-1.0529	-1.05729	-0.933752	0.0990272	-1.02862	-0.203806	-0.582754	1.13973	1.65247	1	Other
336	2.54073	1	12	0.72	-1.82	-0.577331	CM	1	8	0	Primary 7	1	2		0	1	1	1	1	1	2	1	1	-0.491334	-0.303048	-0.832445	0.517586	-0.686462	-0.363585	-0.501474	0.267187	-0.66019	1	Other
336	2.54073	1	24	0.72	-1.82	-0.577331	CM	1	8	0	Primary 7	1	2		0	1	1	1	1	1	2	1	1	-0.368581	0.190711	0.138051	-0.371476	-0.983802	1.34315	1.45542	0.316677	0.709075	1	Other	0.55152	1.27679	0.42182	-0.196656	0.0793884	-1.15638	0.578473	1.30542	1.11321	1	Other
340	9.57153	1	0	-1.77	-2.08	-0.666655	SMA	2	14	1	Primary 7	0	2		1	1	0	0	1	1	2	1	1																							1.07121	0.444618	1.75811	0.490088
340	9.57153	1	6	-1.77	-2.08	-0.666655	SMA	2	14	1	Primary 7	0	2		1	1	0	0	1	1	2	1	1																							2.03209	1.37838	2.20397	1.2586
340	9.57153	1	12	-1.77	-2.08	-0.666655	SMA	2	14	1	Primary 7	0	2		1	1	0	0	1	1	2	1	1																							-0.647624	-1.44798	-0.322526	0.542345
340	9.57153	1	24	-1.77	-2.08	-0.666655	SMA	2	14	1	Primary 7	0	2		1	1	0	0	1	1	2	1	1																							-1.1015	-1.45973	-0.282814	-0.521212
341	2.49692	1	0	-0.15	-0.43	0.21676	CM	1	5	0	Primary 6 or lower	1	2		0	1	4	1	1	0	2	1	1	-0.99507	-1.14303	-1.03663	0.544558	-1.04441	-1.12301	-1.35912	0.214171	-0.840401	1	Mother
341	2.49692	1	6	-0.15	-0.43	0.21676	CM	1	5	0	Primary 6 or lower	1	2		0	1	4	1	1	0	2	1	1	1.67181	1.61542	-0.161693	2.25977	1.25639	0.628279	0.659864	0.238848	-0.756517	1	Mother
341	2.49692	1	12	-0.15	-0.43	0.21676	CM	1	5	0	Primary 6 or lower	1	2		0	1	4	1	1	0	2	1	1	-0.00275215	0.35675	-0.844455	0.0872311	0.291499	0.345463	0.599025	-0.634776	-0.670791	1	Other
341	2.49692	1	24	-0.15	-0.43	0.21676	CM	1	5	0	Primary 6 or lower	1	2		0	1	4	1	1	0	2	1	1	-0.252573	-0.154639	-0.654374	-0.36982	0.32068	0.255543	0.473995	-0.585422	-0.503024	1	Other	0.249541	-0.268204	0.892795	0.542201	0.487881	-0.0880819	0.978223	0.333268	-0.51918	1	Other
342	6.12731	2	0	-1.43	-2.05	0.552791	CM	1	16	1	Not known	0	2		0	0	0	1	0	0	2	0	0																							-0.164054	0.35433	-0.926136	-0.0298227
342	6.12731	2	6	-1.43	-2.05	0.552791	CM	1	16	1	Not known	0	2		0	0	0	1	0	0	2	0	0																							0.162929	0.348469	-0.0572777	-0.00519112
342	6.12731	2	12	-1.43	-2.05	0.552791	CM	1	16	1	Not known	0	2		0	0	0	1	0	0	2	0	0																							-1.25044	-1.53791	-1.30986	0.0209375
342	6.12731	2	24	-1.43	-2.05	0.552791	CM	1	16	1	Not known	0	2		0	0	0	1	0	0	2	0	0																							0.986359	0.330467	1.27713	0.812444
343	6.97604	1	0	0.14	-2.26	0.552791	CM	1	7	1	Primary 7	0	2		1	1	3	1	0	0	2	1	1																							1.80788	2.04211	0.805342	1.10305
343	6.97604	1	6	0.14	-2.26	0.552791	CM	1	7	1	Primary 7	0	2		1	1	3	1	0	0	2	1	1																							0.868694	1.72289	-0.448443	0.38571
343	6.97604	1	12	0.14	-2.26	0.552791	CM	1	7	1	Primary 7	0	2		1	1	3	1	0	0	2	1	1																							-0.386171	-0.163615	-0.85153	0.0413971
343	6.97604	1	24	0.14	-2.26	0.552791	CM	1	7	1	Primary 7	0	2		1	1	3	1	0	0	2	1	1																							-0.206671	-0.17553	-0.386743	0.0914768
344	5.40726	1	0	0.48	-0.64	-0.194277	CM	1	8	1	Primary 6 or lower	1	1		0	0	5	1	0	0	2	0	0
344	5.40726	1	6	0.48	-0.64	-0.194277	CM	1	8	1	Primary 6 or lower	1	1		0	0	5	1	0	0	2	0	0	0.168449	1.07378	-0.385962	0.0266636	-0.291317	-0.371485	-0.559559	0.383115	-0.266124	1	Mother
344	5.40726	1	12	0.48	-0.64	-0.194277	CM	1	8	1	Primary 6 or lower	1	1		0	0	5	1	0	0	2	0	0																							1.79606	2.67547	0.358387	0.704166
344	5.40726	1	24	0.48	-0.64	-0.194277	CM	1	8	1	Primary 6 or lower	1	1		0	0	5	1	0	0	2	0	0																							-0.873503	-0.156589	-1.2998	-0.730105
345	1.73032	1	0	-2.21	-2.34	0.481456	SMA	2	7	0	Primary 7	0	1		1	1	0	0	0	0	1	1	1	-0.344761	0.0747283	-0.402951	-1.16389	0.23955	1.03718	1.16014	0.176206	-0.969452	1	Mother
345	1.73032	1	6	-2.21	-2.34	0.481456	SMA	2	7	0	Primary 7	0	1		1	1	0	0	0	0	1	1	1	0.212765	0.153938	1.25187	-0.312564	-0.399063	0.0342175	0.542554	-1.59681	-0.28505	1	Mother
345	1.73032	1	12	-2.21	-2.34	0.481456	SMA	2	7	0	Primary 7	0	1		1	1	0	0	0	0	1	1	1	1.76394	1.57407	1.73843	0.106615	1.57538	1.06824	1.17513	0.225968	1.00125	2	Mother
345	1.73032	1	24	-2.21	-2.34	0.481456	SMA	2	7	0	Primary 7	0	1		1	1	0	0	0	0	1	1	1	-0.843058	-0.946308	-0.80059	-0.350505	-0.35497	-1.05702	-1.03098	-0.623387	-0.632075	1	Other	-0.325819	-0.0874766	-0.904105	0.270355	-1.64709	0.746893	-0.0892334	0.716541	-0.448646	1	Other
346	4.09582	2	0	-0.2	-1.74	-0.194277	CM	1	7	1	Primary 6 or lower	0	1		1	1	1	1	1	0	2	0	1	-0.168276	0.170078	-0.871818	0.210234	-0.0379741	-1.23294	-1.25491	-0.570433	-0.806407	1	Other
346	4.09582	2	6	-0.2	-1.74	-0.194277	CM	1	7	1	Primary 6 or lower	0	1		1	1	1	1	1	0	2	0	1	-0.108413	-1.09207	1.56081	0.629897	-1.00351	0.157451	0.0685685	0.352546	-0.724367	1	Other
346	4.09582	2	12	-0.2	-1.74	-0.194277	CM	1	7	1	Primary 6 or lower	0	1		1	1	1	1	1	0	2	0	1	1.44377	0.999176	1.26904	1.04887	0.971172	0.474206	0.424868	0.378037	-0.637719	1	Other
346	4.09582	2	24	-0.2	-1.74	-0.194277	CM	1	7	1	Primary 6 or lower	0	1		1	1	1	1	1	0	2	0	1																							0.310125	0.0413259	1.61983	-0.773291
347	3.34565	1	0	-1.53	0.03	-0.367663	CM	1	8	1	Primary 6 or lower	1	2		1	1	1	1	1	1	3	1	1	0.101821	-1.00811	3.02472	-0.340709	-1.01956	1.04013	0.852259	1.15505	-0.697523	1	Other
347	3.34565	1	6	-1.53	0.03	-0.367663	CM	1	8	1	Primary 6 or lower	1	2		1	1	1	1	1	1	3	1	1	1.77102	1.4089	3.11192	-0.352229	0.95344	1.82725	2.03236	0.278847	2.98256	1	Other
347	3.34565	1	12	-1.53	0.03	-0.367663	CM	1	8	1	Primary 6 or lower	1	2		1	1	1	1	1	1	3	1	1	1.0938	0.156329	1.26663	0.0659152	1.62268	1.07119	0.867252	1.20481	0.672664	1	Other
347	3.34565	1	24	-1.53	0.03	-0.367663	CM	1	8	1	Primary 6 or lower	1	2		1	1	1	1	1	1	3	1	1
349	3.83299	1	0	-1.79	-1.79	-0.887823	CM	1	7	0	Primary 7	0	1		1	1	0	1	1	0	2	1	1	0.533923	0.408976	0.777993	-0.352988	0.62772	-0.203974	0.233	-1.51735	-0.615483	1	Other
349	3.83299	1	6	-1.79	-1.79	-0.887823	CM	1	7	0	Primary 7	0	1		1	1	0	1	1	0	2	1	1	0.600848	-1.17894	3.61153	-0.798657	0.317072	1.91355	2.12034	0.307321	-0.523765	1	Other
349	3.83299	1	12	-1.79	-1.79	-0.887823	CM	1	7	0	Primary 7	0	1		1	1	0	1	1	0	2	1	1	-0.329906	-0.0941432	-0.581788	0.0525324	-0.32138	0.791663	0.809765	0.332269	-0.43896	1	Other
349	3.83299	1	24	-1.79	-1.79	-0.887823	CM	1	7	0	Primary 7	0	1		1	1	0	1	1	0	2	1	1	1.65404	1.73923	0.388708	-0.836529	2.9739	2.61815	2.62789	1.2806	0.930305	7	Other	2.22478	2.58761	1.63422	1.79368	0.873351	1.1889	2.019	3.95311	1.54457	1	Other
350	3.40041	1	0	-1.87	0.37	-0.714437	SMA	2	11	0	Secondary or higher	0	2		0	1	0	0	0	0	1	1	1	-0.760008	-0.329596	-0.864299	-0.342089	-0.691352	-0.867651	-1.0821	0.258916	-0.0877859	1	Mother
350	3.40041	1	6	-1.87	0.37	-0.714437	SMA	2	11	0	Secondary or higher	0	2		0	1	0	0	0	0	1	1	1	-0.823215	-0.92063	-0.769781	0.509308	-1.00344	-0.793272	-0.867499	-0.165965	0.596155	1	Mother
350	3.40041	1	12	-1.87	0.37	-0.714437	SMA	2	11	0	Secondary or higher	0	2		0	1	0	0	0	0	1	1	1	-0.386406	-1.17197	0.110374	0.496063	-0.334848	-0.115623	-0.23199	0.30949	0.684647	1	Mother
350	3.40041	1	24	-1.87	0.37	-0.714437	SMA	2	11	0	Secondary or higher	0	2		0	1	0	0	0	0	1	1	1	-0.51013	-0.676037	-0.476303	-0.393343	0.0214158	-0.682076	-0.909574	0.359658	-0.345859	1	Mother	-1.26548	-0.620295	-1.54214	-1.66726	-0.958708	-1.41255	-1.67869	-0.946106	-0.373814	1	Mother
351	1.92197	1	0	-0.45	-0.26	-1.10672	SMA	2	6	0	Secondary or higher	0	2		0	1	0	0	0	0	0	1	1	-0.569378	-0.564615	-0.366396	-1.16872	0.245161	-0.730306	-0.614506	-0.713147	-0.937189	1	Mother
351	1.92197	1	6	-0.45	-0.26	-1.10672	SMA	2	6	0	Secondary or higher	0	2		0	1	0	0	0	0	0	1	1	0.608545	0.854212	0.508536	0.114548	0.259752	-0.0567668	0.0168139	-0.239047	0.347732	1	Mother
351	1.92197	1	12	-0.45	-0.26	-1.10672	SMA	2	6	0	Secondary or higher	0	2		0	1	0	0	0	0	0	1	1	-0.694447	-1.07513	-0.955162	-0.330086	0.274503	0.497844	0.23267	1.13417	0.432537	1	Mother
351	1.92197	1	24	-0.45	-0.26	-1.10672	SMA	2	6	0	Secondary or higher	0	2		0	1	0	0	0	0	0	1	1	-0.695773	-1.58609	-0.764558	-0.355264	0.630366	-0.0706634	-0.308242	0.734235	-0.600274	1	Mother	-0.252134	-0.484543	-0.119558	0.0832927	-0.313768	0.264695	-0.0328646	0.14449	-0.708801	1	Mother
352	4.57769	2	0	-1.13	-2.02	0.49927	SMA	2	15	0	Primary 7	0	1		1	1	0	0	1	0	2	1	1	-0.481324	-0.0882277	-0.77991	-0.665789	-0.0238645	-0.322371	-0.209803	-0.546569	1.07627	1	Mother
352	4.57769	2	6	-1.13	-2.02	0.49927	SMA	2	15	0	Primary 7	0	1		1	1	0	0	1	0	2	1	1	-0.0478772	-0.0090178	-0.684869	0.185538	0.317328	-0.00808096	-0.133552	0.376952	0.559632	1	Mother
352	4.57769	2	12	-1.13	-2.02	0.49927	SMA	2	15	0	Primary 7	0	1		1	1	0	0	1	0	2	1	1	2.74375	3.4201	1.36095	2.76449	0.65868	0.187281	0.221072	-0.0475214	0.043918	2	Mother
352	4.57769	2	24	-1.13	-2.02	0.49927	SMA	2	15	0	Primary 7	0	1		1	1	0	0	1	0	2	1	1																							-0.787795	-0.904356	-0.483885	-0.378762
354	2.12183	2	0	-0.27	-2.81	-0.312634	CM	1	6	0	Secondary or higher	0	1		0	0	1	1	0	0	2	1	1	0.830038	-0.813523	3.04108	-0.17197	0.557428	0.26702	0.246986	0.230652	0.0623248	1	Other
354	2.12183	2	6	-0.27	-2.81	-0.312634	CM	1	6	0	Secondary or higher	0	1		0	0	1	1	0	0	2	1	1	2.74067	2.26459	3.50779	0.249831	1.87562	0.0879276	0.586108	-1.54711	-1.07096	1	Other
354	2.12183	2	12	-0.27	-2.81	-0.312634	CM	1	6	0	Secondary or higher	0	1		0	0	1	1	0	0	2	1	1	3.54837	2.68132	4.38586	1.10074	2.21729	0.644182	1.21994	-1.52161	-0.984313	2	Other
354	2.12183	2	24	-0.27	-2.81	-0.312634	CM	1	6	0	Secondary or higher	0	1		0	0	1	1	0	0	2	1	1	1.56177	1.50055	1.06695	-0.652199	2.24655	-0.523075	-0.153573	-1.47212	-0.215567	7	Mother	-0.0728861	-0.879928	-0.180633	1.32168	-0.931778	2.25899	0.484161	-0.193271	-1.08117	1	Mother
355	5.08693	1	0	0.77	-0.33	-0.194277	CM	1	12	1	Secondary or higher	1	2		1	1	0	1	0	0	2	0	0
355	5.08693	1	6	0.77	-0.33	-0.194277	CM	1	12	1	Secondary or higher	1	2		1	1	0	1	0	0	2	0	0	0.143898	-1.30232	4.25527	-1.26412	-0.950372	0.556515	-0.0350762	2.17091	0.30075	1	Mother
355	5.08693	1	12	0.77	-0.33	-0.194277	CM	1	12	1	Secondary or higher	1	2		1	1	0	1	0	0	2	0	0																							-0.108046	-0.768771	1.19825	-0.420222
355	5.08693	1	24	0.77	-0.33	-0.194277	CM	1	12	1	Secondary or higher	1	2		1	1	0	1	0	0	2	0	0																							0.0732417	-1.09505	2.51549	-0.736909
359	4.5859	2	0	-1.64	0.02	-0.194277		3	6	1	Primary 6 or lower		1	1										-0.604394	-0.0869218	-0.778343	-0.234055	-0.676827	1.23561	1.31789	0.352682	0.477132	1	Mother
359	4.5859	2	6	-1.64	0.02	-0.194277		3	6	1	Primary 6 or lower		1	1										2.20136	1.35105	3.23913	1.47812	0.647697	1.20873	1.13504	0.832747	-0.0192248	2	Mother
359	4.5859	2	12	-1.64	0.02	-0.194277		3	6	1	Primary 6 or lower		1	1										-0.820921	-0.890128	0.243328	-0.265994	-1.29291	-0.729624	-0.985934	0.41546	-0.510511	1	Mother
359	4.5859	2	24	-1.64	0.02	-0.194277		3	6	1	Primary 6 or lower		1	1
360	3.60301	2	0	0.45	-0.28	-0.887823		3	5	0	Primary 6 or lower		1	0										-1.09737	-1.24788	-0.965814	0.222651	-1.03221	-0.947663	-0.636489	-1.49368	-0.889368	1	Mother
360	3.60301	2	6	0.45	-0.28	-0.887823		3	5	0	Primary 6 or lower		1	0										2.1899	2.51528	2.24879	-0.653786	1.9218	-0.633373	-0.560237	-0.570162	0.395553	2	Mother
360	3.60301	2	12	0.45	-0.28	-0.887823		3	5	0	Primary 6 or lower		1	0										-0.229802	-0.0838755	-0.774688	0.197404	-0.0230627	-0.198512	-0.0668467	-0.545213	-0.72068	1	Mother
360	3.60301	2	24	0.45	-0.28	-0.887823		3	5	0	Primary 6 or lower		1	0										-0.479287	-0.259925	-0.584084	-1.55554	0.659402	-0.767019	-0.468992	-1.39457	-0.552453	1	Mother	-0.180556	-0.293455	0.000333783	0.0986588	-0.280877	-0.217649	0.322417	-0.632191	-0.08388	1	Mother
361	4.71184	2	0	-0.58	-1.06	0.49927		3	8	1	Secondary or higher		2	0										1.52043	1.27271	1.19541	0.194713	1.61307	-0.182485	-0.328041	0.358919	0.498333	1
361	4.71184	2	6	-0.58	-1.06	0.49927		3	8	1	Secondary or higher		2	0										-0.773856	-0.654889	-0.656148	0.613685	-1.31127	-0.584228	-0.94311	0.833832	0.584981	1	Mother
361	4.71184	2	12	-0.58	-1.06	0.49927		3	8	1	Secondary or higher		2	0										0.528146	0.429033	0.60873	-0.694693	0.989531	1.40656	1.35341	0.858509	-0.532173	2	Other	0.916558	1.389	0.521877	-0.112675	1.24674	0.0949968	-0.270672	0.0409597	1.88864	1	Other
361	4.71184	2	24	-0.58	-1.06	0.49927		3	8	1	Secondary or higher		2	0																																-1.25834	-0.906752	-1.32485	-0.739678
362	4.00548	1	0	-0.54	-1.42	-2.10153		3	7	0	Primary 6 or lower		2	0										-0.809763	-0.233413	-0.748892	-0.357334	-1.00024	-0.776834	-0.989507	0.288881	-0.586447	1	Mother
362	4.00548	1	6	-0.54	-1.42	-2.10153		3	7	0	Primary 6 or lower		2	0										-0.622121	-0.820965	0.519642	-0.370372	-0.985085	-0.339918	-0.771556	1.21335	-0.499337	1	Mother
362	4.00548	1	12	-0.54	-1.42	-2.10153		3	7	0	Primary 6 or lower		2	0										-0.437169	-0.74219	1.00411	-0.382858	-0.970574	-0.744538	-1.25079	1.23789	-0.415915	1	Mother
362	4.00548	1	24	-0.54	-1.42	-2.10153		3	7	0	Primary 6 or lower		2	0																																-0.269605	-0.453566	-0.506096	0.313992
363	5.95483	2	0	-0.2	0.17	-0.514224		3	6	1	Primary 6 or lower		2	1
363	5.95483	2	6	-0.2	0.17	-0.514224		3	6	1	Primary 6 or lower		2	1																																0.476242	0.350283	1.21018	-0.383798
363	5.95483	2	12	-0.2	0.17	-0.514224		3	6	1	Primary 6 or lower		2	1																																0.171524	0.343645	0.80808	-0.726886
363	5.95483	2	24	-0.2	0.17	-0.514224		3	6	1	Primary 6 or lower		2	1																																-0.437507	-0.296577	0.00464175	-0.670137
364	10.7625	2	0	-2.05	-1.64	0.247929		3	12	1	Secondary or higher		2	1																																-0.541208	-0.327206	-0.316396	-0.5414
364	10.7625	2	6	-2.05	-1.64	0.247929		3	12	1	Secondary or higher		2	1																																-0.846618	-0.960176	-1.14434	0.226836
364	10.7625	2	12	-2.05	-1.64	0.247929		3	12	1	Secondary or higher		2	1																																-0.0448196	-0.339316	-0.275481	0.622454
364	10.7625	2	24	-2.05	-1.64	0.247929		3	12	1	Secondary or higher		2	1																																-0.498521	-0.351166	-0.235441	-0.440696
365	5.06229	2	0	-2.06	-2.95	0.152497	SMA	2	10	1	Primary 6 or lower	0	2		0	1	0	0	1	0	0	1	1	-0.421797	-0.346098	-0.68748	-0.246058	-0.00967461	-0.968134	-0.690714	-1.42141	-0.64371	1	Other
365	5.06229	2	6	-2.06	-2.95	0.152497	SMA	2	10	1	Primary 6 or lower	0	2		0	1	0	0	1	0	0	1	1	-0.730472	-0.263842	-0.588784	-0.691037	-0.647726	1.14528	1.46997	-0.496944	0.644437	1	Other
365	5.06229	2	12	-2.06	-2.95	0.152497	SMA	2	10	1	Primary 6 or lower	0	2		0	1	0	0	1	0	0	1	1																							0.15145	0.354913	-0.503577	0.338713
365	5.06229	2	24	-2.06	-2.95	0.152497	SMA	2	10	1	Primary 6 or lower	0	2		0	1	0	0	1	0	0	1	1																							0.0148683	0.969459	-0.462443	-0.723075
366	5.99863	1	0	-1.66	-0.98	2.05975		3	19	1	Secondary or higher		2	0
366	5.99863	1	6	-1.66	-0.98	2.05975		3	19	1	Secondary or higher		2	0																																-1.2085	-1.39967	-0.485748	-0.773653
366	5.99863	1	12	-1.66	-0.98	2.05975		3	19	1	Secondary or higher		2	0																																1.17514	0.788478	2.07959	-0.00909105
366	5.99863	1	24	-1.66	-0.98	2.05975		3	19	1	Secondary or higher		2	0																																-0.544154	-0.163777	-0.426454	-0.699894
367	4.32854	1	0	1.06	0.3	-0.887823		3	14	1	Primary 7		2	0										-0.894158	-0.516962	-0.687273	-0.365474	-0.990777	-1.08759	-1.07884	-0.593964	-0.532061	1
367	4.32854	1	6	1.06	0.3	-0.887823		3	14	1	Primary 7		2	0										-0.920035	-0.0549735	-0.53479	-1.2495	-0.967367	-0.728101	-1.23403	1.24332	0.803559	1	Mother
367	4.32854	1	12	1.06	0.3	-0.887823		3	14	1	Primary 7		2	0										-0.27845	-0.697363	-0.501891	0.0419779	0.344089	-0.702212	-0.375036	-1.44467	-0.368443	1	Mother	-1.31781	-1.13835	-1.08976	-1.20672	-0.996184	-1.45721	-0.880012	-1.30684	-0.901094	2	Mother
367	4.32854	1	24	1.06	0.3	-0.887823		3	14	1	Primary 7		2	0																																-0.895827	-0.770779	-0.493078	-0.78277
368	2.89117	2	0	-0.76	-1.27	0.481456	SMA	2	10	0	Secondary or higher	0	2		0	1	0	0	0	0	0	1	1	0.428224	-0.0214181	1.62803	-0.623295	0.253353	-0.695256	-0.74542	-0.18067	0.792356	2	Mother
368	2.89117	2	6	-0.76	-1.27	0.481456	SMA	2	10	0	Secondary or higher	0	2		0	1	0	0	0	0	0	1	1	0.118875	0.0599678	0.165903	-0.636195	0.594946	-0.498661	-0.38954	-0.604737	0.278024	1	Mother
368	2.89117	2	12	-0.76	-1.27	0.481456	SMA	2	10	0	Secondary or higher	0	2		0	1	0	0	0	0	0	1	1	2.28977	1.47923	1.82125	0.215063	2.89583	1.01354	0.936034	0.768343	1.56341	2	Mother	0.0958662	-0.930168	0.27175	1.02006	0.31129	2.21433	0.0247748	-0.554003	-0.964121	5	Mother
368	2.89117	2	24	-0.76	-1.27	0.481456	SMA	2	10	0	Secondary or higher	0	2		0	1	0	0	0	0	0	1	1	-1.17905	-0.69754	-0.707324	-1.53926	-0.665924	-1.22325	-1.12294	-0.977145	-0.661224	1	Other	-1.26163	-0.886286	-1.27502	-1.14668	-1.31507	-1.25037	-0.918772	-0.526443	-0.940294	2	Other
369	2.43669	1	0	0.8	-0.23	-0.842027	CM	1	7	0	Primary 7	0	2		1	1	0	1	0	1	2	1	1	-0.75431	-1.1526	-0.658168	0.114135	-0.39297	-0.413551	-0.53574	0.211188	0.350497	1	Mother
369	2.43669	1	6	0.8	-0.23	-0.842027	CM	1	7	0	Primary 7	0	2		1	1	0	1	0	1	2	1	1	0.773655	0.572404	0.962191	0.538074	0.269533	1.66986	1.73313	0.676339	2.20552	2	Mother
369	2.43669	1	12	0.8	-0.23	-0.842027	CM	1	7	0	Primary 7	0	2		1	1	0	1	0	1	2	1	1	-0.403913	0.989129	-0.109473	-1.20266	-1.0218	-1.48612	-1.24098	-1.54528	0.49061	1	Mother	-0.175743	0.439941	-0.4195	-0.656853	-0.49656	-0.770765	-0.437791	0.881338	0.203988	1	Mother
369	2.43669	1	24	0.8	-0.23	-0.842027	CM	1	7	0	Primary 7	0	2		1	1	0	1	0	1	2	1	1	-1.01992	-0.854042	-0.689884	-1.22901	-0.337974	-0.490899	-0.387097	-0.594642	-0.534365	1	Mother	0.342734	0.0129345	0.108992	0.603208	0.222449	1.4852	-0.12572	-0.361354	0.225119	1	Mother
370	5.99863	2	0	0.48	0.08	0.705221		3	9	1	Not known		2	1																																-0.325037	0.355852	-0.506749	-0.77819
370	5.99863	2	6	0.48	0.08	0.705221		3	9	1	Not known		2	1																																0.319528	0.349408	-0.484979	0.732834
370	5.99863	2	12	0.48	0.08	0.705221		3	9	1	Not known		2	1																																-0.619602	-0.283205	-0.465069	-0.726341
370	5.99863	2	24	0.48	0.08	0.705221		3	9	1	Not known		2	1																																-0.281946	-0.295055	-0.425029	0.0654378
371	1.99863	2	0	-1.13	-2.23	0.21676	SMA	2	8	0	Primary 7	1	2		0	1	0	0	1	0	1	1	1	0.0704275	0.171605	0.677905	-1.46469	0.55382	-0.829221	-1.15954	0.673973	-1.15945	1
371	1.99863	2	6	-1.13	-2.23	0.21676	SMA	2	8	0	Primary 7	1	2		0	1	0	0	1	0	1	1	1	-0.852928	-1.07836	-0.384359	-0.183076	-0.736071	-1.22357	-1.48953	0.252482	0.136529	1	Other
371	1.99863	2	12	-1.13	-2.23	0.21676	SMA	2	8	0	Primary 7	1	2		0	1	0	0	1	0	1	1	1	1.06947	0.675374	2.83025	-0.195631	-0.0682777	-0.909278	-1.13574	0.277159	1.42145	2	Mother	-0.0119671	-0.0764301	0.0427009	-0.295183	0.502574	0.298357	-0.646199	0.121112	-0.11334	5	Mother
371	1.99863	2	24	-1.13	-2.23	0.21676	SMA	2	8	0	Primary 7	1	2		0	1	0	0	1	0	1	1	1	-1.16495	-0.504953	-0.878084	-1.5167	-0.692139	-0.998375	-0.982403	-0.57206	-0.811937	1	Other	-1.94245	-1.57242	-1.88482	-1.46416	-2.20544	-1.54841	-1.18591	-1.76968	-1.23416	2	Other
372	4.06571	2	0	-0.84	-2.89	-0.714437	CM	1	9	0	Primary 6 or lower	0	2		0	1	1	1	0	0	2	0	0	-0.0478963	-0.169613	-0.09767	-0.652889	0.614347	0.678533	0.960753	-0.571924	-0.811476	1
372	4.06571	2	6	-0.84	-2.89	-0.714437	CM	1	9	0	Primary 6 or lower	0	2		0	1	1	1	0	0	2	0	0	0.251718	-0.103025	1.54201	-0.663444	-0.0265902	0.621656	0.33102	1.24651	-0.740959	1	Mother
372	4.06571	2	12	-0.84	-2.89	-0.714437	CM	1	9	0	Primary 6 or lower	0	2		0	1	1	1	0	0	2	0	0	0.798818	0.297597	2.01081	0.190022	-0.0144847	0.683707	0.394283	1.26698	-0.671364	1	Mother	0.151895	0.962407	-0.435944	-0.913987	0.375496	-0.452796	-1.14642	1.03833	0.811834	2	Mother
372	4.06571	2	24	-0.84	-2.89	-0.714437	CM	1	9	0	Primary 6 or lower	0	2		0	1	1	1	0	0	2	0	0	-0.442965	-0.212921	-0.527686	0.164774	-0.638346	-0.483139	-0.423744	-0.48108	-0.502676	1	Other	1.15071	0.402043	1.54712	0.965672	2.14939	1.2435	0.620325	1.36579	-0.147905	1	Other
373	5.98768	2	0	-1.39	-2.42	-0.54105	CM	1	8	1	Secondary or higher	0	2		0	0	0	1	1	0	2	0	0	1.18083	2.14533	0.268916	1.45839	-0.309179	0.00901045	0.144731	-0.476741	0.112592	1	Mother
373	5.98768	2	6	-1.39	-2.42	-0.54105	CM	1	8	1	Secondary or higher	0	2		0	0	0	1	1	0	2	0	0																							2.21804	2.22999	1.63624	1.10205
373	5.98768	2	12	-1.39	-2.42	-0.54105	CM	1	8	1	Secondary or higher	0	2		0	0	0	1	1	0	2	0	0																							-0.462023	-0.282816	-0.466381	-0.356989
373	5.98768	2	24	-1.39	-2.42	-0.54105	CM	1	8	1	Secondary or higher	0	2		0	0	0	1	1	0	2	0	0																							-0.440737	-0.294764	-0.00148453	-0.677758
374	2.49418	2	0	-0.38	-2.19	-0.0479372	SMA	2	10	1	Secondary or higher	0	2		0	1	0	0	1	0	1	1	1	-0.116859	-0.0845248	-0.78736	0.682531	-0.0848725	-0.515342	-0.667403	0.249092	-1.07603	1	Mother
374	2.49418	2	6	-0.38	-2.19	-0.0479372	SMA	2	10	1	Secondary or higher	0	2		0	1	0	0	1	0	1	1	1	-1.28535	-2.00038	-1.06503	0.235758	-0.720839	-0.666491	-0.854859	0.278244	-0.976938	1	Mother
374	2.49418	2	12	-0.38	-2.19	-0.0479372	SMA	2	10	1	Secondary or higher	0	2		0	1	0	0	1	0	1	1	1	-0.980351	-1.92683	-0.97678	1.08798	-0.707291	1.07945	1.15868	0.301158	-0.899047	1	Mother
374	2.49418	2	24	-0.38	-2.19	-0.0479372	SMA	2	10	1	Secondary or higher	0	2		0	1	0	0	1	0	1	1	1	-0.732846	-1.09729	-0.785132	0.630724	-0.677869	0.272269	0.479842	-0.547925	-0.729898	1	Mother	-0.646966	0.598287	-1.38583	-1.41837	-1.21561	-1.38618	-1.25017	1.2416	0.214457	2	Mother
375	4.62423	1	0	0.99	0.03	1.3662	SMA	2	12	0	Primary 7	1	2		0	1	0	0	1	0	0	1	1	0.507037	0.869658	-0.240929	1.35484	-0.328915	0.274035	0.215314	0.319524	1.31927	2
375	4.62423	1	6	0.99	0.03	1.3662	SMA	2	12	0	Primary 7	1	2		0	1	0	0	1	0	0	1	1	-0.552168	-0.73044	-0.541578	0.479162	-0.641808	-0.613693	-0.545644	-0.556135	0.797567	1	Mother
375	4.62423	1	12	0.99	0.03	1.3662	SMA	2	12	0	Primary 7	1	2		0	1	0	0	1	0	0	1	1	-0.863871	-0.6521	-0.447582	-1.26102	-0.300776	-1.25822	-1.0253	-1.43057	0.880528	1	Mother	0.782969	0.371722	0.331848	1.43478	-0.0629467	2.18064	0.672697	-0.580007	0.803186	1	Mother
375	4.62423	1	24	0.99	0.03	1.3662	SMA	2	12	0	Primary 7	1	2		0	1	0	0	1	0	0	1	1																							-0.890923	-0.773531	-0.483779	-0.771203
376	4.91444	2	0	-3.09	-2.47	-0.367663		3	8	1	Secondary or higher		2	0										-0.0677195	0.300208	0.0642126	-0.674274	-0.0140038	-0.391576	-0.574571	0.368953	-0.668599	1	Mother
376	4.91444	2	6	-3.09	-2.47	-0.367663		3	8	1	Secondary or higher		2	0										0.00492353	-0.945401	0.177008	0.174708	0.656516	-0.542313	-0.484075	-0.500605	-0.569045	1	Other
376	4.91444	2	12	-3.09	-2.47	-0.367663		3	8	1	Secondary or higher		2	0										-1.43224	-0.878377	-0.522464	-1.56368	-1.29075	-0.958029	-0.974622	-0.479724	-0.498067	1	Mother
376	4.91444	2	24	-3.09	-2.47	-0.367663		3	8	1	Secondary or higher		2	0																																0.487433	0.344001	0.382348	0.384574
377	5.10335	1	0	-2.08	-1.35	-0.02089		3	6	1	Primary 6 or lower		2	1										-0.178585	0.610918	-0.149543	0.0469447	-0.968089	-1.2108	-0.960269	-1.45444	-0.401627	1	Mother
377	5.10335	1	6	-2.08	-1.35	-0.02089		3	6	1	Primary 6 or lower		2	1										0.00972956	-0.310668	0.340143	0.46571	-0.299574	-0.174312	-0.325179	0.36915	0.887442	1	Mother
377	5.10335	1	12	-2.08	-1.35	-0.02089		3	6	1	Primary 6 or lower		2	1																																0.840487	0.171924	1.19618	0.690149
377	5.10335	1	24	-2.08	-1.35	-0.02089		3	6	1	Primary 6 or lower		2	1																																-0.246301	-0.153286	0.387158	-0.743986
378	6.17933	1	0	1.12	0.73	0.40036		3	11	1	Secondary or higher		2																																	-0.266433	0.484734	-0.500079	-0.79148
378	6.17933	1	6	1.12	0.73	0.40036		3	11	1	Secondary or higher		2																																	-0.572246	-0.148009	-0.479731	-0.766168
378	6.17933	1	12	1.12	0.73	0.40036		3	11	1	Secondary or higher		2																																	-0.877483	-0.781075	-0.458289	-0.739495
378	6.17933	1	24	1.12	0.73	0.40036		3	11	1	Secondary or higher		2																																	-0.698906	-0.165752	-0.84431	-0.691593
379	3.26078	1	0	-0.82	-0.28	1.3662		3	19	0	Primary 7		2	0										-1.27348	-0.686697	-0.890931	-1.20245	-1.02204	-1.72686	-1.65853	-1.09627	-0.111292	1	Mother
379	3.26078	1	6	-0.82	-0.28	1.3662		3	19	0	Primary 7		2	0										-0.0952184	-0.941956	0.764415	0.512688	-0.354168	-0.813407	-0.749262	-0.622031	-0.627466	1	Mother
379	3.26078	1	12	-0.82	-0.28	1.3662		3	19	0	Primary 7		2	0										0.0998225	-0.515221	-0.295238	0.930073	0.31595	0.830047	0.865576	0.305423	-0.530217	1	Mother
379	3.26078	1	24	-0.82	-0.28	1.3662		3	19	0	Primary 7		2	0										-0.0313003	-0.0288605	-0.503457	0.474126	0.0172471	1.45205	1.56644	0.352608	-0.369825	1	Mother	-1.09993	-0.322751	-1.4586	-1.46369	-1.2119	-1.45994	-1.30182	-0.0419536	-0.420545	2	Mother
380	1.62081	1	0	1.97	-1.38	-0.312634	SMA	2	9	0	Secondary or higher	0	2		0	1	0	0	1	1	1	1	1	1.50298	0.727128	2.30578	-0.729191	1.86935	0.781239	0.17201	2.41789	0.21315	2	Mother
380	1.62081	1	6	1.97	-1.38	-0.312634	SMA	2	9	0	Secondary or higher	0	2		0	1	0	0	1	1	1	1	1	-0.544827	-1.20265	-1.10817	-0.309873	0.904217	-0.939807	-1.13899	0.195596	-0.903543	1	Mother
380	1.62081	1	12	1.97	-1.38	-0.312634	SMA	2	9	0	Secondary or higher	0	2		0	1	0	0	1	1	1	1	1	1.74947	1.22045	0.546135	0.109582	2.87834	-0.506179	-0.369321	-0.678707	-0.820121	2	Mother	-1.5353	-1.44142	-0.96311	-1.14197	-1.53228	-1.80531	-0.422545	-1.54984	-1.13747	1	Mother
380	1.62081	1	24	1.97	-1.38	-0.312634	SMA	2	9	0	Secondary or higher	0	2		0	1	0	0	1	1	1	1	1	-0.857183	-0.964587	-0.822523	-1.21149	0.294866	-1.91252	-2.01995	-0.629082	-0.651433	1	Mother	-1.36553	-1.30007	-1.17975	-0.91366	-1.46578	-0.926646	-0.752579	-1.22239	-1.13072	1	Mother
381	3.45791	1	0	0.53	-0.87	-1.58137	CM	1	5	0	Secondary or higher	0	2		0	1	0	1	1	0	2	0	0	-0.132549	-0.990265	1.48634	-0.343537	-0.363067	1.65572	1.56327	1.16061	-0.678626	1	Mother
381	3.45791	1	6	0.53	-0.87	-1.58137	CM	1	5	0	Secondary or higher	0	2		0	1	0	1	1	0	2	0	0	-0.813799	-1.57825	0.024733	0.507376	-1.0012	-0.183017	-0.3007	0.287254	-0.591977	1	Mother
381	3.45791	1	12	0.53	-0.87	-1.58137	CM	1	5	0	Secondary or higher	0	2		0	1	0	1	1	0	2	0	0	-1.24891	-1.49904	-0.660118	-0.369061	-0.986608	-0.108226	-0.501983	1.21078	-0.508094	1	Mother	0.845763	1.007	1.00682	-0.357663	1.97344	-0.370651	-0.288832	1.2741	0.759588	1	Mother
381	3.45791	1	24	0.53	-0.87	-1.58137	CM	1	5	0	Secondary or higher	0	2		0	1	0	1	1	0	2	0	0	-0.251882	1.01154	-0.460637	-1.2593	-0.302781	-0.669748	-0.619472	-0.535119	-0.332032	1	Other	0.369383	1.39867	-0.175567	-0.748945	0.131357	-1.11266	-0.396117	1.61587	1.10288	1	Other
382	2.9514	1	0	-3.97	-2.86	-0.0479372		3	9	0	Secondary or higher		2											-0.815163	-1.07078	-0.94994	-0.330775	-0.0512968	-0.336295	-0.734508	1.13552	-0.763892	1	Mother
382	2.9514	1	6	-3.97	-2.86	-0.0479372		3	9	0	Secondary or higher		2											-0.0192313	-0.334384	-0.0901515	0.954494	-0.365633	0.445077	0.439729	0.257424	-0.693375	1	Mother
382	2.9514	1	12	-3.97	-2.86	-0.0479372		3	9	0	Secondary or higher		2											-0.702499	-0.924982	-0.775002	0.0780563	-0.351042	0.0408678	0.238447	-0.616743	-0.609491	1	Mother
382	2.9514	1	24	-3.97	-2.86	-0.0479372		3	9	0	Secondary or higher		2											-0.083092	-0.765692	0.585961	-0.379133	0.331503	-0.646979	-0.302047	-1.46596	-0.440803	7	Mother	-0.10372	-0.714554	0.259956	0.67327	-0.262565	0.580047	0.669154	-0.496626	-0.720023	1	Mother
383	7.9206	2	0	-1.66	-2.05	-1.12395		3	7	1	Secondary or higher		2	1																																0.981629	0.333122	2.54175	-0.311672
383	7.9206	2	6	-1.66	-2.05	-1.12395		3	7	1	Secondary or higher		2	1																																-0.27364	-0.299718	0.439782	-0.656937
383	7.9206	2	12	-1.66	-2.05	-1.12395		3	7	1	Secondary or higher		2	1																																0.0533441	0.321142	0.459583	-0.632305
383	7.9206	2	24	-1.66	-2.05	-1.12395		3	7	1	Secondary or higher		2	1																																0.232728	0.309292	-0.349434	0.530459
384	4.59959	2	0	1.51	-1.04	2.57991	CM	1	16	1	Secondary or higher	1	2		0	1	0	1	1	0	2	0	0	-1.09903	-1.08946	0.00415935	-0.666341	-1.32963	-0.678333	-0.622752	-0.545485	-0.721602	1	Mother
384	4.59959	2	6	1.51	-1.04	2.57991	CM	1	16	1	Secondary or higher	1	2		0	1	0	1	1	0	2	0	0	-1.28363	-1.34211	-0.28709	-0.679379	-1.31448	-0.720416	-0.959869	0.378986	-0.634492	1	Mother
384	4.59959	2	12	1.51	-1.04	2.57991	CM	1	16	1	Secondary or higher	1	2		0	1	0	1	1	0	2	0	0	-0.59664	-0.921029	-0.57364	0.602786	-0.645401	-0.399551	-0.876913	1.30468	-0.543235	1	Other	-0.711896	-0.506855	-0.718027	-0.771108	-0.479005	-0.744507	-0.709635	-1.24808	-0.0659062	1	Other
384	4.59959	2	24	1.51	-1.04	2.57991	CM	1	16	1	Secondary or higher	1	2		0	1	0	1	1	0	2	0	0																							-0.627505	-0.278769	-0.480056	-0.744985
385	8.28474	2	0	0.25	-0.41	-0.0569319	CM	1	9	1	Primary 7	0	2		1	1	2	1	0	0	2	0	1																							0.356216	0.328816	0.433656	0.0774134
385	8.28474	2	6	0.25	-0.41	-0.0569319	CM	1	9	1	Primary 7	0	2		1	1	2	1	0	0	2	0	1																							0.36706	0.322729	0.454223	0.102998
385	8.28474	2	12	0.25	-0.41	-0.0569319	CM	1	9	1	Primary 7	0	2		1	1	2	1	0	0	2	0	1																							-0.413856	-0.309852	-0.375034	-0.243356
385	8.28474	2	24	0.25	-0.41	-0.0569319	CM	1	9	1	Primary 7	0	2		1	1	2	1	0	0	2	0	1																							0.0820712	0.305018	-0.334994	0.177437
386	4.75291	1	0	-0.39	-0.57	-1.2346		3	8	0	Not known		2	0										-0.593871	0.220306	-0.606331	-0.376166	-0.97835	-0.0659	0.0962386	-0.572948	-0.460622	1
386	4.75291	1	6	-0.39	-0.57	-1.2346		3	8	0	Not known		2	0										-0.0336544	-0.031907	-0.507113	1.77043	-0.963118	0.850426	1.14721	-0.547186	-0.373052	1	Mother
386	4.75291	1	12	-0.39	-0.57	-1.2346		3	8	0	Not known		2	0										-0.592843	-0.622505	-0.412072	-0.401828	-0.295325	0.805466	0.807162	0.376336	-0.289168	1	Mother
386	4.75291	1	24	-0.39	-0.57	-1.2346		3	8	0	Not known		2	0																																-0.56942	-0.776316	0.374687	-0.7595
387	2.04517	2	0	-1.96	-0.72	-0.577331	CM	1	10	0	Primary 6 or lower	0	2		0	1	1	1	1	0	2	0	0	-1.41281	-1.49552	-1.26295	0.261903	-1.40443	0.854263	0.651556	1.1257	-1.15162	1	Mother
387	2.04517	2	6	-1.96	-0.72	-0.577331	CM	1	10	0	Primary 6 or lower	0	2		0	1	1	1	1	0	2	0	0	-0.231858	-0.072774	-0.383315	-0.183214	-0.082708	1.17225	1.00911	1.1516	-1.06359	1	Mother
387	2.04517	2	12	-1.96	-0.72	-0.577331	CM	1	10	0	Primary 6 or lower	0	2		0	1	1	1	1	0	2	0	0	-0.0462339	-0.662937	-0.287752	0.236103	0.585166	0.169704	0.530715	-1.0707	-0.979243	1	Mother	-0.672001	-0.775073	0.0449316	-0.927402	0.291444	-1.33417	-0.43407	-0.826881	-0.593889	1	Mother
387	2.04517	2	24	-1.96	-0.72	-0.577331	CM	1	10	0	Primary 6 or lower	0	2		0	1	1	1	1	0	2	0	0	-1.16327	-0.502777	-0.875473	-0.653165	-1.34494	-0.756821	-0.980309	0.327462	-0.809633	1	Mother	0.494762	-0.0469023	1.05184	0.319066	1.42659	0.363951	0.28592	0.136146	-0.102095	1	Mother
388	9.76044	1	0	-0.27	-0.51	1.61981	CM	1	13	1	Secondary or higher	1	2		0	0	1	1	0	0	2	0	0																							0.283833	0.129023	0.9166	-0.242493
388	9.76044	1	6	-0.27	-0.51	1.61981	CM	1	13	1	Secondary or higher	1	2		0	0	1	1	0	0	2	0	0																							-0.812645	-0.817468	-0.335325	-0.586534
388	9.76044	1	12	-0.27	-0.51	1.61981	CM	1	13	1	Secondary or higher	1	2		0	0	1	1	0	0	2	0	0																							-0.485315	-0.196802	-0.314868	-0.561086
388	9.76044	1	24	-0.27	-0.51	1.61981	CM	1	13	1	Secondary or higher	1	2		0	0	1	1	0	0	2	0	0																							-0.305931	-0.208653	-0.274828	-0.140292
389	5.20739	2	0	0.51	1.03	2.40652		3	10	1	Secondary or higher		2	0										-0.279893	0.0118727	-0.659804	0.182227	-0.332027	-1.0661	-1.36234	0.383461	-0.619283	1	Mother
389	5.20739	2	6	0.51	1.03	2.40652		3	10	1	Secondary or higher		2	0										-0.960134	-0.239905	-0.560063	-0.694831	-1.29652	-0.628366	-0.86602	0.409358	-0.531251	1	Mother
389	5.20739	2	12	0.51	1.03	2.40652		3	10	1	Secondary or higher		2	0																																-1.58469	-1.52797	-1.34345	-0.762812
389	5.20739	2	24	0.51	1.03	2.40652		3	10	1	Secondary or higher		2	0																																-0.613891	-0.28641	-0.454238	-0.712869
390	2.70773	2	0	0.82	0.33	0.672657	CM	1	9	0	Primary 6 or lower	0	2		0	0	0	1	1	0	2	1	1	3.3836	1.28904	1.59305	3.2688	3.8406	0.594459	0.197878	1.60793	3.76407	2	Mother
390	2.70773	2	6	0.82	0.33	0.672657	CM	1	9	0	Primary 6 or lower	0	2		0	0	0	1	1	0	2	1	1	-0.153498	-0.306272	-1.04153	2.8243	-1.37043	-1.8455	-1.66861	-1.51334	0.24484	1	Mother
390	2.70773	2	12	0.82	0.33	0.672657	CM	1	9	0	Primary 6 or lower	0	2		0	0	0	1	1	0	2	1	1	0.528444	0.108277	-0.94597	1.08391	1.25705	0.8642	1.1834	-0.589687	2.73126	1	Mother	1.12437	0.399448	1.68467	1.71231	0.683071	1.05854	2.06274	0.0153644	0.581993	1	Mother
390	2.70773	2	24	0.82	0.33	0.672657	CM	1	9	0	Primary 6 or lower	0	2		0	0	0	1	1	0	2	1	1	-0.217022	-0.402241	-0.754844	0.626723	-0.0200164	-0.182896	-0.050926	-0.540061	-0.703166	1	Mother	0.465098	0.0729895	0.245977	1.17847	-0.317549	1.66466	0.684312	0.342817	-0.0555829	1	Mother
391	3.66051	2	0	-2.58	-1.76	1.01943		3	9	1	Secondary or higher		2	0										1.01904	0.100878	-0.174956	2.38091	0.929084	0.497965	0.482445	0.306853	2.72342	2	Other
391	3.66051	2	6	-2.58	-1.76	1.01943		3	9	1	Secondary or higher		2	0										-0.533788	-0.82593	-0.861374	0.208855	-0.0363707	0.451772	0.418673	0.331123	1.60489	1	Other
391	3.66051	2	12	-2.58	-1.76	1.01943		3	9	1	Secondary or higher		2	0										-0.222067	0.261039	-0.762677	-0.236124	-0.0212188	-0.42856	-0.473511	-0.0926725	1.692	1	Mother	1.38867	1.11019	1.57908	1.16391	1.37837	0.833361	1.30109	1.28007	0.897428	1	Mother
391	3.66051	2	24	-2.58	-1.76	1.01943		3	9	1	Secondary or higher		2	0										0.0257748	-0.248609	-0.570507	1.03431	0.00828304	-0.516835	-0.458099	-0.492198	0.0600494	1	Mother	0.897336	0.668827	0.997314	0.632007	1.23298	0.623678	0.553336	0.65864	0.583813	1	Mother
392	3.99179	2	0	-4.16	-1.7	1.3662	SMA	2	11	0	Secondary or higher	0	2		0	1	0	0	0	0	0	1	1	1.80421	0.823348	1.83796	1.07674	1.59199	0.547688	0.53314	0.323259	1.57815	2
392	3.99179	2	6	-4.16	-1.7	1.3662	SMA	2	11	0	Secondary or higher	0	2		0	1	0	0	0	0	0	1	1	0.506267	0.575052	0.772041	-0.664754	0.628136	-0.208785	-0.0773209	-0.548603	0.468835	1	Mother
392	3.99179	2	12	-4.16	-1.7	1.3662	SMA	2	11	0	Secondary or higher	0	2		0	1	0	0	0	0	0	1	1	1.68284	0.987425	2.42478	0.186849	1.29561	0.343361	0.829857	-1.42331	4.75451	2	Mother	0.698446	0.073946	0.820322	0.909043	1.05095	1.49693	0.358904	1.07949	-0.435481	1	Mother
392	3.99179	2	24	-4.16	-1.7	1.3662	SMA	2	11	0	Secondary or higher	0	2		0	1	0	0	0	0	0	1	1	-0.183372	-0.198124	-0.509932	0.162429	0.0175826	0.00983236	0.145569	-0.47647	-0.487005	1	Mother	0.136895	-0.615674	0.594757	0.998682	0.0411515	0.729403	1.06746	-0.505146	-0.600595	1	Mother
393	2.23682	2	0	-1.35	-0.13	1.80494	SMA	2	17	0	Secondary or higher	1	2		0	1	0	0	0	0	0	1	1	-1.01703	-0.795244	-0.836447	-0.606808	-0.745611	0.0447794	0.264583	-0.662498	0.682201	1	Mother
393	2.23682	2	6	-1.35	-0.13	1.80494	SMA	2	17	0	Secondary or higher	1	2		0	1	0	0	0	0	0	1	1	0.534478	0.625323	1.60036	-0.619639	-0.0774971	0.121213	0.0649766	0.261566	0.167409	1	Mother
393	2.23682	2	12	-1.35	-0.13	1.80494	SMA	2	17	0	Secondary or higher	1	2		0	1	0	0	0	0	0	1	1	1.58832	2.04415	-0.644277	1.09557	1.8967	0.555253	0.418762	0.735666	-0.949745	2	Mother	-0.769465	-1.06031	0.0925265	-0.103108	-0.940152	-1.27584	0.876283	-1.08651	-0.858538	1	Mother
393	2.23682	2	24	-1.35	-0.13	1.80494	SMA	2	17	0	Secondary or higher	1	2		0	1	0	0	0	0	0	1	1	-0.522017	0.194015	-0.843097	0.20644	-1.01337	-1.21034	-1.23187	-0.562976	-0.781057	1	Other	-0.489154	-0.21724	-0.124114	-0.63695	-0.446804	-1.48734	0.126892	-0.125276	-0.207459	1	Other
394	3.83847	2	0	-1.07	0.23	0.325883		3	9	1	Primary 6 or lower		2	0										1.41314	1.13388	-0.141013	1.0806	1.9141	1.96167	1.61981	2.11336	1.55234	2	Mother
394	3.83847	2	6	-1.07	0.23	0.325883		3	9	1	Primary 6 or lower		2	0										-0.632981	-0.45882	-0.822731	-0.660132	-0.0304382	0.482182	0.172142	1.24	1.63899	1	Mother
394	3.83847	2	12	-1.07	0.23	0.325883		3	9	1	Primary 6 or lower		2	0										0.54427	1.29404	0.0511575	-0.240608	0.310594	0.55615	0.663857	-0.0838593	2.92299	2	Mother	0.905382	0.358161	1.26081	0.972962	1.21466	0.892604	0.934837	0.704443	0.150433	1	Mother
394	3.83847	2	24	-1.07	0.23	0.325883		3	9	1	Primary 6 or lower		2	0										-1.18677	-0.212051	-0.526642	-1.56313	-1.29139	-1.44032	-1.53304	-0.480809	0.0987647	1	Other	-0.394706	-0.297625	-0.651097	-0.30265	-0.410171	0.155151	-0.63611	0.100009	-0.468271	1	Other
395	5.8371	1	0	-1.01	-0.33	0.49927	CM	1	9	1	Primary 6 or lower	0	2		0	1	1	1	0	0	2	1	1	1.77274	2.40208	1.94014	-1.26737	1.66621	1.89308	1.51105	2.17728	-0.278107	2
395	5.8371	1	6	-1.01	-0.33	0.49927	CM	1	9	1	Primary 6 or lower	0	2		0	1	1	1	0	0	2	1	1																							-0.579341	-0.770746	-0.917716	0.33005
395	5.8371	1	12	-1.01	-0.33	0.49927	CM	1	9	1	Primary 6 or lower	0	2		0	1	1	1	0	0	2	1	1																							2.12166	1.10359	2.07368	1.83849
395	5.8371	1	24	-1.01	-0.33	0.49927	CM	1	9	1	Primary 6 or lower	0	2		0	1	1	1	0	0	2	1	1																							-0.546634	-0.162385	-0.431158	-0.705746
396	9.65092	1	0	-1.11	-1.25	1.46737		3	13	1	Secondary or higher		2	0																																-0.509831	-0.183042	-0.361362	-0.618922
396	9.65092	1	6	-1.11	-1.25	1.46737		3	13	1	Secondary or higher		2	0																																-0.181867	-0.816173	1.35841	-0.591977
396	9.65092	1	12	-1.11	-1.25	1.46737		3	13	1	Secondary or higher		2	0																																-0.17108	0.431213	-0.319244	-0.566529
396	9.65092	1	24	-1.11	-1.25	1.46737		3	13	1	Secondary or higher		2	0																																0.483119	1.04608	-0.279204	0.22525
397	6.66667	1	0	-1.13	-1.61	1.01008	CM	1	11	1	Primary 6 or lower	0	2		0	1	3	1	0	0	2	1	1																							-0.572708	-0.14775	-0.480606	-0.767257
397	6.66667	1	6	-1.13	-1.61	1.01008	CM	1	11	1	Primary 6 or lower	0	2		0	1	3	1	0	0	2	1	1																							0.387766	-0.153837	-0.46004	1.48424
397	6.66667	1	12	-1.13	-1.61	1.01008	CM	1	11	1	Primary 6 or lower	0	2		0	1	3	1	0	0	2	1	1																							0.556536	-0.159729	0.408929	1.13802
397	6.66667	1	24	-1.13	-1.61	1.01008	CM	1	11	1	Primary 6 or lower	0	2		0	1	3	1	0	0	2	1	1																							-0.055495	-0.171548	-0.400199	0.445724
398	4.50103	2	0	-1.21	-0.45	-0.367663		3	10	0	Primary 7		2	1										-0.118502	-0.435318	-0.794532	0.631966	0.300492	-0.214127	-0.637835	1.24732	-0.738194	1	Mother
398	4.50103	2	6	-1.21	-0.45	-0.367663		3	10	0	Primary 7		2	1										-1.29775	-1.02548	-0.698969	-0.676481	-1.31784	-0.0191762	-0.422397	1.27214	-0.65385	1	Mother
398	4.50103	2	12	-1.21	-0.45	-0.367663		3	10	0	Primary 7		2	1										-0.738207	-0.94366	-0.600795	0.174432	-0.64957	0.177829	-0.066098	0.848205	-0.567201	1	Mother	0.2827	-0.209312	1.07639	0.194617	1.18862	-0.519358	0.715631	-0.66082	0.0484442	1	Mother
398	4.50103	2	24	-1.21	-0.45	-0.367663		3	10	0	Primary 7		2	1																																0.160737	0.66306	-0.485964	-0.0103624
399	5.21013	1	0	-1.7	-2.41	1.01943	SMA	2	16	1	Secondary or higher	1	2		0	1	0	0	1	0	0	1	1	0.0826898	0.627891	-0.519123	0.476196	-0.311759	0.960725	0.998808	0.34854	-0.383652	1
399	5.21013	1	6	-1.7	-2.41	1.01943	SMA	2	16	1	Secondary or higher	1	2		0	1	0	0	1	0	0	1	1	-0.353092	-0.633386	-0.425127	-1.26399	1.00908	1.75319	2.18436	-0.525899	-0.300691	1	Mother
399	5.21013	1	12	-1.7	-2.41	1.01943	SMA	2	16	1	Secondary or higher	1	2		0	1	0	0	1	0	0	1	1																							-0.583322	-0.141792	-0.500736	-0.792297
399	5.21013	1	24	-1.7	-2.41	1.01943	SMA	2	16	1	Secondary or higher	1	2		0	1	0	0	1	0	0	1	1																							-0.0873948	0.473078	-0.0361671	-0.742489
400	3.49897	1	0	0.97	0.01	1.19282		3	8	1	Primary 7		2	0										-0.375663	0.690784	-0.8455	0.0873691	-1.01507	-0.613358	-0.511948	-0.635048	-0.671712	1	Other
400	3.49897	1	6	0.97	0.01	1.19282		3	8	1	Primary 7		2	0										-0.680975	-0.562224	-0.741582	-0.3583	-0.345911	-0.411832	-0.567341	0.290779	-0.579994	1	Other
400	3.49897	1	12	0.97	0.01	1.19282		3	8	1	Primary 7		2	0										-0.992005	-0.817918	-0.646541	-0.370855	-0.984523	-1.53454	-1.60122	-0.583388	-0.496111	1	Other	-1.06092	-1.18845	-0.562518	-0.586473	-0.994615	-1.16458	-0.0579138	-1.55466	-0.827864	1	Other
400	3.49897	1	24	0.97	0.01	1.19282		3	8	1	Primary 7		2	0										-0.868915	-0.658629	-0.455415	-0.396103	-0.955182	-0.785389	-0.754049	-0.533763	-0.327423	1	Other	0.103713	-0.345376	0.68731	0.149948	0.779278	-0.285917	0.450765	0.0403571	-0.498949	1	Other
401	3.92882	1	0	-0.57	-0.56	1.19282		3	9	0	Primary 6 or lower		2	0										0.793852	0.424209	1.96611	-0.355402	0.303925	1.12766	0.941499	1.18393	0.601686	2	Mother
401	3.92882	1	6	-0.57	-0.56	1.19282		3	9	0	Primary 6 or lower		2	0										0.112602	-0.163778	0.114552	0.0635697	0.318996	-0.351835	-0.783706	1.20942	0.688335	1	Mother
401	3.92882	1	12	-0.57	-0.56	1.19282		3	9	0	Primary 6 or lower		2	0										1.53868	0.920144	1.37943	0.482956	1.63999	0.201954	0.263914	-0.11417	0.772218	2	Mother	0.310934	0.130776	0.768114	0.190407	0.611017	-0.48643	0.690394	-0.790257	0.591997	1	Mother
401	3.92882	1	24	-0.57	-0.56	1.19282		3	9	0	Primary 6 or lower		2	0										-0.690017	0.0821203	-0.370296	-1.27123	-0.615513	-1.31716	-1.24083	-0.961084	-0.252297	1	Mother	0.22251	0.64042	-0.413529	0.0541489	-0.376601	0.407731	-0.254786	0.503082	0.614026	1	Mother
402	2.6694	1	0	0.11	-2.08	1.01085	SMA	2	12	0	Secondary or higher	0	2		0	1	0	0	0	0	0	1	1	-0.601644	-1.78542	0.166111	-0.32367	0.267047	0.100378	-0.222594	1.12156	2.79175	1	Mother
402	2.6694	1	6	0.11	-2.08	1.01085	SMA	2	12	0	Secondary or higher	0	2		0	1	0	0	0	0	0	1	1	-0.666869	-1.70925	-0.912342	0.52814	0.281077	0.651291	0.405793	1.14529	0.470331	1	Mother
402	2.6694	1	12	0.11	-2.08	1.01085	SMA	2	12	0	Secondary or higher	0	2		0	1	0	0	0	0	0	1	1	-0.356493	-0.289121	-0.815734	0.515378	-0.357295	-0.470184	-0.904368	1.17037	-0.645441	1	Mother	0.19591	0.350602	0.0519737	-0.0118535	0.0381278	0.175375	-0.112925	0.0568116	0.491783	1	Mother
402	2.6694	1	24	0.11	-2.08	1.01085	SMA	2	12	0	Secondary or higher	0	2		0	1	0	0	0	0	0	1	1	-0.481562	-0.129831	-0.624608	-0.373752	-0.327953	-1.03828	-1.02856	-0.577694	-0.476753	1	Mother	1.19473	0.725863	1.1796	1.10565	1.38517	1.59913	0.605432	0.384265	0.820698	1	Mother
403	1.86721	1	0	-0.91	-0.72	0.481456	SMA	2	15		Secondary or higher	0	2		0	0	0	0	1	0	0	1	1	0.292452	-0.908223	0.403051	0.560424	0.896761	-0.0200258	-0.0678171	0.182986	-0.946407	1	Mother
403	1.86721	1	6	-0.91	-0.72	0.481456	SMA	2	15		Secondary or higher	0	2		0	0	0	0	1	0	0	1	1	-0.399896	-0.840764	0.483993	-0.31415	-0.397219	0.762168	0.829724	0.204002	0.32607	1	Mother
403	1.86721	1	12	-0.91	-0.72	0.481456	SMA	2	15		Secondary or higher	0	2		0	0	0	0	1	0	0	1	1	0.407134	0.244899	0.191176	0.536901	0.270895	1.0781	1.32395	-0.220201	-0.789241	1	Mother	-1.51902	-0.671011	-1.52431	-2.09314	-1.26762	-2.28934	-1.62588	-0.856113	-0.43293	2	Mother
403	1.86721	1	24	-0.91	-0.72	0.481456	SMA	2	15		Secondary or higher	0	2		0	0	0	0	1	0	0	1	1	-0.462412	-0.265619	-0.397589	-1.21611	0.300237	-0.926993	-0.881744	-0.619997	-0.620553	1	Mother	0.529925	0.639874	0.947571	0.167601	0.506276	-0.865581	0.979581	1.37269	0.218148	1	Mother
404	2.75975	1	0	-2.01	0.58	0.481456	CM	1	9	0	Secondary or higher	0	2		0	0	0	1	0	0	2	0	0	0.402089	0.573275	-0.206603	-0.325947	0.922896	1.79044	1.73397	1.12603	1.0054	1	Mother
404	2.75975	1	6	-2.01	0.58	0.481456	CM	1	9	0	Secondary or higher	0	2		0	0	0	1	0	0	2	0	0	-0.415011	-0.364849	-0.906597	-0.336501	0.281959	-0.0626877	-0.4222	1.14678	0.4754	1	Mother
404	2.75975	1	12	-2.01	0.58	0.481456	CM	1	9	0	Secondary or higher	0	2		0	0	0	1	0	0	2	0	0	-0.726041	-0.955448	-0.811557	0.0828851	-0.356654	-0.586647	-0.762249	0.27261	-0.641754	1	Mother
404	2.75975	1	24	-2.01	0.58	0.481456	CM	1	9	0	Secondary or higher	0	2		0	0	0	1	0	0	2	0	0	0.265604	-0.126349	0.159461	0.489578	0.325891	-0.436245	-0.331374	-0.576609	-0.473066	7	Mother	0.761113	0.0323465	0.941133	1.49449	0.32417	1.60642	1.241	-0.242362	0.183561	1	Mother
405	1.78234	1	0	-0.7	-1.5		CM	1			Not known	1	2		1	1	2	1	0	0	3	1	1	0.902423	0.0829975	-0.393029	1.85839	1.22088	2.00298	2.27823	0.178783	0.240343	1	Mother
405	1.78234	1	6	-0.7	-1.5		CM	1			Not known	1	2		1	1	2	1	0	0	3	1	1
405	1.78234	1	12	-0.7	-1.5		CM	1			Not known	1	2		1	1	2	1	0	0	3	1	1
405	1.78234	1	24	-0.7	-1.5		CM	1			Not known	1	2		1	1	2	1	0	0	3	1	1
406	2.11088	2	0	0.73	-0.8	0.746153	CM	1	14	0	Primary 7	0	2		0	1	0	1	1	0	2	1	1	-0.412101	-0.145455	-0.470522	0.260247	-0.749299	-0.333373	0.106543	-1.56758	0.0604812	1	Mother
406	2.11088	2	6	0.73	-0.8	0.746153	CM	1	14	0	Primary 7	0	2		0	1	0	1	1	0	2	1	1	-0.226477	0.938902	-1.15485	-0.184318	-0.408027	0.699826	0.738282	0.254922	-1.05621	1	Mother
406	2.11088	2	12	0.73	-0.8	0.746153	CM	1	14	0	Primary 7	0	2		0	1	0	1	1	0	2	1	1	-0.535489	0.0160107	-1.05668	0.234655	-0.719557	0.777082	1.09458	-0.618431	-0.969564	1	Mother	0.56636	-0.519635	1.52702	0.744328	1.80147	0.865318	0.631476	-1.44188	0.0693101	1	Mother
406	2.11088	2	24	0.73	-0.8	0.746153	CM	1	14	0	Primary 7	0	2		0	1	0	1	1	0	2	1	1	-1.0328	-0.494508	-0.865551	-1.08642	-0.690215	-0.150264	-0.000979834	-0.568806	0.400162	1	Mother	0.459783	-0.261328	1.06597	0.337513	1.65455	0.653811	0.0917642	0.153145	-0.407184	1	Mother
407	3.32101	2	0	-2.56	-0.35	-0.54105	SMA	2	8	0	Secondary or higher	0	2		0	1	0	0	0	0	0	1	1	0.605104	-0.957801	2.09997	0.661698	0.26594	0.20751	-0.124575	1.18888	0.264197	1	Mother
407	3.32101	2	6	-2.56	-0.35	-0.54105	SMA	2	8	0	Secondary or higher	0	2		0	1	0	0	0	0	0	1	1	-1.19017	-1.2074	-0.137357	-1.51153	-0.698152	0.886802	0.651377	1.21546	0.354533	1	Mother
407	3.32101	2	12	-2.56	-0.35	-0.54105	SMA	2	8	0	Secondary or higher	0	2		0	1	0	0	0	0	0	1	1	-0.632981	-0.45882	-0.822731	-0.660132	-0.0304382	0.841431	0.865977	0.341157	-0.763082	1	Mother	1.54221	1.22618	1.61577	1.17928	1.71727	1.27363	0.997466	0.860293	1.27733	1	Mother
407	3.32101	2	24	-2.56	-0.35	-0.54105	SMA	2	8	0	Secondary or higher	0	2		0	1	0	0	0	0	0	1	1	-0.630271	-0.294742	-0.62586	-0.254198	-0.653418	-0.799894	-0.780043	-0.506571	-0.589324	1	Mother	-0.100178	0.326239	-0.0591598	-0.233064	-0.555487	-1.10819	0.46674	0.246911	0.327471	2	Mother
408	1.69747	1	0	0.91	0.14	-0.0479372	CM	1	6	0	Secondary or higher	0	2		1	1	0	1	0	0	2	1	1	0.519759	0.0695057	-0.799163	0.564701	1.54499	1.27174	1.15511	1.07342	3.82917	2	Mother
408	1.69747	1	6	0.91	0.14	-0.0479372	CM	1	6	0	Secondary or higher	0	2		1	1	0	1	0	0	2	1	1	1.32746	0.486231	2.02863	1.41561	0.253659	1.94775	1.92771	1.09891	2.71478	1	Mother
408	1.69747	1	12	0.91	0.14	-0.0479372	CM	1	6	0	Secondary or higher	0	2		1	1	0	1	0	0	2	1	1	0.0352318	-0.424474	-0.198247	1.40071	-0.382227	0.958763	1.60191	-1.56833	1.6133	1	Mother	-1.7943	-1.60561	-1.15695	-1.83811	-1.05343	-2.28842	-1.20571	-1.489	-1.39852	2	Mother
408	1.69747	1	24	0.91	0.14	-0.0479372	CM	1	6	0	Secondary or higher	0	2		1	1	0	1	0	0	2	1	1	0.40648	-0.265184	0.382825	0.511584	0.626919	1.58816	1.75525	0.278983	0.580946	1	Mother	0.254645	0.874806	0.215081	-0.593587	0.293617	-1.13721	-0.0679928	-0.210873	1.34662	2	Mother
409	2.55715	1	0	-0.98	-2.54	1.01085	SMA	2	15	1	Primary 6 or lower	0	2		0	1	0	0	1	0	0	1	1	1.74208	1.88068	2.09443	0.111099	0.916963	-0.634969	-0.794839	0.217154	1.57181	2	Mother
409	2.55715	1	6	-0.98	-2.54	1.01085	SMA	2	15	1	Primary 6 or lower	0	2		0	1	0	0	1	0	0	1	1	-0.441916	-1.06947	-0.948374	1.39678	-0.377658	-0.814061	-1.28832	1.13593	-0.762509	1	Mother
409	2.55715	1	12	-0.98	-2.54	1.01085	SMA	2	15	1	Primary 6 or lower	0	2		0	1	0	0	1	0	0	1	1	-0.880724	-0.995053	-0.859077	-0.342779	-0.363949	-1.46229	-1.77174	0.260272	-0.683696	1	Mother
409	2.55715	1	24	-0.98	-2.54	1.01085	SMA	2	15	1	Primary 6 or lower	0	2		0	1	0	0	1	0	0	1	1	-0.261317	-0.165954	-0.667951	0.495856	-0.334607	-0.832889	-0.924568	-0.139525	-0.515008	1	Mother	-0.71781	-0.411815	-0.83742	-1.00736	-0.385701	-0.656866	-1.1398	0.310006	-0.703628	1	Mother
410	4.79124	2	0	-1.23	-1.23	0.49927		3	10	1	Secondary or higher		2	1										1.65426	1.95514	1.21055	-0.67117	1.942	1.98493	2.04315	0.812274	1.71274	2
410	4.79124	2	6	-1.23	-1.23	0.49927		3	10	1	Secondary or higher		2	1										-0.0199634	-0.307799	-0.641527	-0.68407	1.30379	-0.0937231	0.317523	-1.40948	-0.603151	1	Mother
410	4.79124	2	12	-1.23	-1.23	0.49927		3	10	1	Secondary or higher		2	1										1.28238	1.11146	1.01382	0.59913	0.991855	1.89748	1.92063	0.862441	0.68223	2	Mother	0.947527	0.0152982	1.15447	1.9479	0.415227	2.02923	1.64012	-0.566879	0.303887	5	Mother
410	4.79124	2	24	-1.23	-1.23	0.49927		3	10	1	Secondary or higher		2	1																																-0.623467	-0.281035	-0.472398	-0.735459
411	5.83984	2	0	-0.47	-0.18	0.672657		3	17	1	Secondary or higher		2	0										0.79043	0.782216	-0.149229	0.598233	0.992898	1.06457	1.23224	-0.0346405	0.0877032	2	Mother
411	5.83984	2	6	-0.47	-0.18	0.672657		3	17	1	Secondary or higher		2	0																																-0.475405	-1.21538	-0.491762	0.724396
411	5.83984	2	12	-0.47	-0.18	0.672657		3	17	1	Secondary or higher		2	0																																0.960286	0.658462	-0.0459002	1.4929
411	5.83984	2	24	-0.47	-0.18	0.672657		3	17	1	Secondary or higher		2	0																																-1.07653	-0.919962	-0.855684	-0.684154
412	4.38877	1	0	-1.63	-0.49	0.49927		3	8	1	Secondary or higher		2	1										-0.76268	-0.842291	-0.675784	-0.366992	-0.33581	1.07694	0.873118	1.20671	-0.521921	1	Mother
412	4.38877	1	6	-1.63	-0.49	0.49927		3	8	1	Secondary or higher		2	1										0.0453594	0.579582	-0.577088	-0.38003	0.332545	0.436112	0.119701	1.23233	0.766226	1	Mother
412	4.38877	1	12	-1.63	-0.49	0.49927		3	8	1	Secondary or higher		2	1
412	4.38877	1	24	-1.63	-0.49	0.49927		3	8	1	Secondary or higher		2	1																																-0.578188	-0.144674	-1.34006	-0.0382135
413	8.00274	1	0	-0.24	0.58	-0.0569319		3	7	1	Secondary or higher		2	0																																1.03816	0.46317	-0.42722	2.26704
413	8.00274	1	6	-0.24	0.58	-0.0569319		3	7	1	Secondary or higher		2	0																																0.257298	-0.169443	-0.831838	1.54984
413	8.00274	1	12	-0.24	0.58	-0.0569319		3	7	1	Secondary or higher		2	0																																-0.520445	-0.803804	-0.381491	0.098009
413	8.00274	1	24	-0.24	0.58	-0.0569319		3	7	1	Secondary or higher		2	0																																-0.818644	-0.18738	-1.19576	-0.600687
414	5.87269	1	0	-0.61	0.03	-1.2346		3	8	0	Not known		2	0										-0.704479	-0.271498	-0.392751	-0.404381	-0.945562	0.102172	0.267595	-0.517492	-0.272115	1
414	5.87269	1	6	-0.61	0.03	-1.2346		3	8	0	Not known		2	0																																-0.103662	-0.144512	-0.491546	0.332092
414	5.87269	1	12	-0.61	0.03	-1.2346		3	8	0	Not known		2	0																																0.539922	-0.150405	1.22648	0.356859
414	5.87269	1	24	-0.61	0.03	-1.2346		3	8	0	Not known		2	0																																-0.545827	-0.789558	0.419431	-0.70384
416	3.40315	1	0	-0.72	-1.67	-0.367663	CM	1	8	1	Secondary or higher	0	2		0	1	1	1	0	0	2	1	1	0.481122	-0.329161	-0.863777	2.68143	0.288532	-0.268491	-0.110311	-0.639793	0.513194	1	Mother
416	3.40315	1	6	-0.72	-1.67	-0.367663	CM	1	8	1	Secondary or higher	0	2		0	1	1	1	0	0	2	1	1	0.177827	-0.239941	-0.36678	1.80341	-0.348236	-0.423749	-0.301957	-0.611998	-0.59336	1	Mother
416	3.40315	1	12	-0.72	-1.67	-0.367663	CM	1	8	1	Secondary or higher	0	2		0	1	1	1	0	0	2	1	1	-0.631538	-0.833151	-0.664818	0.927383	-0.987329	-0.351424	-0.505753	0.310711	0.688795	1	Mother
416	3.40315	1	24	-0.72	-1.67	-0.367663	CM	1	8	1	Secondary or higher	0	2		0	1	1	1	0	0	2	1	1	0.489232	0.337379	-0.465859	2.19692	-0.303582	0.164391	0.486474	-0.985897	0.864397	1	Mother	0.800862	0.335836	0.428025	1.27377	0.337133	2.14874	0.434426	0.0224634	0.449569	1	Mother
417	4.32307	2	0	-0.83	-1.94	0.49927	CM	1	13	1	Secondary or higher	0	2		0	1	0	1	1	0	2	1	1	-0.140362	-0.463607	-0.828475	0.204509	0.621883	0.717161	0.445068	1.23851	0.432885	1
417	4.32307	2	6	-0.83	-1.94	0.49927	CM	1	13	1	Secondary or higher	0	2		0	1	0	1	1	0	2	1	1	-0.200879	-0.716255	-0.729779	1.91924	-0.669371	-0.163171	-0.30835	0.365292	-0.681043	1	Mother
417	4.32307	2	12	-0.83	-1.94	0.49927	CM	1	13	1	Secondary or higher	0	2		0	1	0	1	1	0	2	1	1	-0.758722	-0.970208	-0.632649	0.17864	-0.65446	-0.326237	-0.507956	0.390511	-0.595316	1	Mother	0.438637	-0.622715	1.39764	0.516472	1.99566	0.515219	0.45612	-0.715396	-0.48962	1	Mother
417	4.32307	2	24	-0.83	-1.94	0.49927	CM	1	13	1	Secondary or higher	0	2		0	1	0	1	1	0	2	1	1																							-0.79241	-1.21513	-0.492637	-0.0186637
418	6.00137	2	0	-0.48	-0.19	-0.209363	SMA	2	9	1	Primary 7	0	2		1	0	0	0	0	0	0	1	1																							0.782921	0.98254	-0.50664	1.07687
418	6.00137	2	6	-0.48	-0.19	-0.209363	SMA	2	9	1	Primary 7	0	2		1	0	0	0	0	0	0	1	1																							0.319067	0.349668	-0.485854	0.731745
418	6.00137	2	12	-0.48	-0.19	-0.209363	SMA	2	9	1	Primary 7	0	2		1	0	0	0	0	0	0	1	1																							0.646108	0.343775	-0.465944	1.49848
418	6.00137	2	24	-0.48	-0.19	-0.209363	SMA	2	9	1	Primary 7	0	2		1	0	0	0	0	0	0	1	1																							0.508949	1.272	-0.425904	0.064349
419	3.28542	1	0	-0.89	-0.68	0.846043	SMA	2	8	0	Primary 7	0	2		0	0	0	0	0	0	0	1	1	2.32785	2.66626	1.0635	1.82051	1.26489	2.22859	2.23071	1.15207	1.69441	2	Other
419	3.28542	1	6	-0.89	-0.68	0.846043	SMA	2	8	0	Primary 7	0	2		0	0	0	0	0	0	0	1	1	-0.0871469	-0.931511	-0.00294372	-0.35285	0.954162	1.7112	1.89737	0.280068	0.584633	1	Other
419	3.28542	1	12	-0.89	-0.68	0.846043	SMA	2	8	0	Primary 7	0	2		0	0	0	0	0	0	0	1	1	1.21216	2.15835	-0.302026	0.0670879	1.29471	2.5012	2.6641	0.753082	-0.536209	2	Other	2.49398	2.93266	2.55013	0.726351	2.9939	-0.153704	1.33876	1.53642	3.28208	1	Other
419	3.28542	1	24	-0.89	-0.68	0.846043	SMA	2	8	0	Primary 7	0	2		0	0	0	0	0	0	0	1	1	0.0998417	0.315183	-0.492491	0.904619	-0.307671	0.263183	0.465107	-0.543389	-0.360146	1	Mother	0.58059	0.517452	0.634509	0.589121	0.298127	0.194459	0.812118	-0.65695	1.04806	1	Mother
420	4.83504	1	0	-0.46	-0.61	-0.194277	SMA	2	9	0	Primary 6 or lower	0	2		1	1	0	0	0	0	1	1	1	-0.459702	-0.436446	0.189227	-0.378236	-0.649344	-0.173322	-0.307493	0.329964	-0.446795	1
420	4.83504	1	6	-0.46	-0.61	-0.194277	SMA	2	9	0	Primary 6 or lower	0	2		1	1	0	0	0	0	1	1	1	0.10724	0.324758	0.298889	-0.392723	0.0206944	0.0327242	-0.0807434	0.358438	-0.350007	1	Mother
420	4.83504	1	12	-0.46	-0.61	-0.194277	SMA	2	9	0	Primary 6 or lower	0	2		1	1	0	0	0	0	1	1	1	-0.827549	-0.605097	-0.391184	-1.26847	-0.292118	-1.09409	-1.11882	-0.517085	-0.270733	1	Other
420	4.83504	1	24	-0.46	-0.61	-0.194277	SMA	2	9	0	Primary 6 or lower	0	2		1	1	0	0	0	0	1	1	1																							-0.884636	-0.77706	-0.471855	-0.75637
421	3.44969	1	0	0.44	-0.27	0.325883	CM	1	16	1	Secondary or higher	0	2		0	0	0	1	1	0	2	0	1	1.10724	2.02257	0.314938	0.952493	-0.0367061	1.29524	1.42325	0.261356	-0.680009	2	Mother
421	3.44969	1	6	0.44	-0.27	0.325883	CM	1	16	1	Secondary or higher	0	2		0	0	0	1	1	0	2	0	1	-0.319835	-0.91149	0.0210776	0.0759178	-0.0219552	1.01161	0.806502	1.18515	-0.595204	1	Mother
421	3.44969	1	12	0.44	-0.27	0.325883	CM	1	16	1	Secondary or higher	0	2		0	0	0	1	1	0	2	0	1	0.36177	-0.162472	0.506064	0.495304	0.319237	1.20615	1.29905	0.310982	1.29024	1	Mother	2.33057	2.0524	2.8347	1.28688	3.0352	0.440599	1.80223	1.26784	2.20303	1	Mother
421	3.44969	1	24	0.44	-0.27	0.325883	CM	1	16	1	Secondary or higher	0	2		0	0	0	1	1	0	2	0	1	-0.880014	-0.672991	-0.472647	-1.25771	-0.304624	0.159049	0.342261	-0.538237	-0.342632	1	Other	1.72657	1.60899	2.00703	0.880067	2.24801	0.229093	1.26252	1.59529	1.40438	1	Other
422	3.56194	2	0	1.55	-0.68	0.672657	SMA	2	6	1	Primary 6 or lower	0	2		0	1	0	0	0	0	0	1	1	1.13102	0.420114	1.75597	0.223686	0.926198	0.363421	0.189828	0.751394	0.304756	2	Mother
422	3.56194	2	6	1.55	-0.68	0.672657	SMA	2	6	1	Primary 6 or lower	0	2		0	1	0	0	0	0	0	1	1	-1.16327	-1.84239	-0.875473	-0.653165	-0.0385352	-0.277822	-0.425241	0.327462	0.391405	1	Mother
422	3.56194	2	12	1.55	-0.68	0.672657	SMA	2	6	1	Primary 6 or lower	0	2		0	1	0	0	0	0	0	1	1	-0.473925	-0.413557	-0.378476	0.196576	-0.675304	-0.31333	-0.200586	-0.543586	1.08641	1	Other
422	3.56194	2	24	1.55	-0.68	0.672657	SMA	2	6	1	Primary 6 or lower	0	2		0	1	0	0	0	0	0	1	1	-0.830001	-0.901879	-0.550663	-0.696073	-0.315272	-0.740719	-0.719712	-0.487046	0.0775634	1	Other	0.882646	0.941695	0.781162	-0.220284	2.11574	0.385768	-0.673689	1.64331	0.456881	1	Other
423	5.1499	1	0	-0.57	0.45	0.672657	SMA	2	17	1	Primary 7	0	2		0	1	0	0	0	0	0	1	1
423	5.1499	1	6	-0.57	0.45	0.672657	SMA	2	17	1	Primary 7	0	2		0	1	0	0	0	0	0	1	1	-0.730375	-0.974818	-0.43296	-0.399069	-0.298532	-0.887468	-0.8748	-0.527932	-0.307604	1	Mother
423	5.1499	1	12	-0.57	0.45	0.672657	SMA	2	17	1	Primary 7	0	2		0	1	0	0	0	0	0	1	1																							-0.424877	-0.141889	-0.0758787	-0.791888
423	5.1499	1	24	-0.57	0.45	0.672657	SMA	2	17	1	Primary 7	0	2		0	1	0	0	0	0	0	1	1																							-0.244916	-0.780784	0.389784	0.00125157
424	4.61054	2	0	0.56	0.34	0.49927		3	10	1	Primary 6 or lower		2	0										-0.725447	-1.08772	0.00624821	-0.234676	-0.676105	0.28131	0.211525	0.353902	-0.719758	1	Mother
424	4.61054	2	6	0.56	0.34	0.49927		3	10	1	Primary 6 or lower		2	0										0.331423	1.00483	-0.673903	-0.679793	0.972214	0.599298	0.569081	0.3798	-0.631727	1	Mother
424	4.61054	2	12	0.56	0.34	0.49927		3	10	1	Primary 6 or lower		2	0										0.0207301	0.414671	-0.57834	0.171466	0.00708052	0.794249	0.923286	-0.0448096	0.0531359	1	Mother	0.826048	-0.516083	2.33042	1.12555	2.28863	0.0649196	1.79915	0.0114351	-0.718322	1	Mother
424	4.61054	2	24	0.56	0.34	0.49927		3	10	1	Primary 6 or lower		2	0																																-1.10284	-0.905198	-0.90557	-0.74621
425	3.55647	1	0	0.16	-0.39	-1.58137		3	8	0	Primary 6 or lower		2	0										-0.244521	-0.304789	-0.444588	0.517862	-0.360181	-0.365228	-0.50315	0.266644	0.539004	1	Mother
425	3.55647	1	6	0.16	-0.39	-1.58137		3	8	0	Primary 6 or lower		2	0										0.563182	0.44684	1.21337	0.504893	-0.345109	-0.407722	-0.285618	-0.60671	1.82669	1	Mother
425	3.55647	1	12	0.16	-0.39	-1.58137		3	8	0	Primary 6 or lower		2	0										-0.740147	-0.813131	-0.640797	0.492269	-0.983642	0.385978	0.346121	0.316948	0.709997	1	Mother
425	3.55647	1	24	0.16	-0.39	-1.58137		3	8	0	Primary 6 or lower		2	0										-0.865216	-0.653841	-0.449671	-0.396861	-0.9543	0.895629	0.638229	1.26542	-0.322353	1	Mother	-0.492508	-0.217145	-0.282155	-0.60153	-0.492854	-1.36606	0.0403949	-1.21737	0.316345	2	Mother
426	4.34223	2	0	-0.57	-0.79	0.325883	CM	1	9	1	Primary 7	1	2		0	0	1	1	0	0	2	1	1	1.10279	1.88377	0.345018	-0.659856	1.27565	-0.118211	0.0316996	-0.55823	-0.764926	2
426	4.34223	2	6	-0.57	-0.79	0.325883	CM	1	9	1	Primary 7	1	2		0	0	1	1	0	0	2	1	1	0.171695	-0.380915	-0.729257	-0.240539	1.61692	-0.16276	-0.0303967	-0.533417	2.32201	2	Mother
426	4.34223	2	12	-0.57	-0.79	0.325883	CM	1	9	1	Primary 7	1	2		0	0	1	1	0	0	2	1	1	-0.511236	-0.30127	-0.633694	-0.685104	-0.00141735	-0.686308	-0.647561	-0.508604	-0.596238	1	Mother	-0.447816	-0.390859	-0.070315	-0.755733	0.286737	-1.12186	-0.384226	-0.717185	-0.169254	1	Mother
426	4.34223	2	24	-0.57	-0.79	0.325883	CM	1	9	1	Primary 7	1	2		0	0	1	1	0	0	2	1	1																							-0.157651	0.0373758	-0.489464	-0.0147172
427	3.26899	1	0	0.3	-0.66	0.672657	CM	1	7	1	Primary 6 or lower	0	2		0	1	0	1	0	0	2	0	0	0.588722	0.319321	-0.109473	0.525105	0.937807	0.549622	0.562994	0.252407	0.49061	1	Mother
427	3.26899	1	6	0.3	-0.66	0.672657	CM	1	7	1	Primary 6 or lower	0	2		0	1	0	1	0	0	2	0	0	1.14658	1.40368	-0.0139099	0.944422	0.952478	2.18157	2.44363	0.27722	2.97703	2	Mother
427	3.26899	1	12	0.3	-0.66	0.672657	CM	1	7	1	Primary 6 or lower	0	2		0	1	0	1	0	0	2	0	0	-0.527973	-0.189891	-0.696672	-0.364232	-0.339017	0.102508	0.301292	-0.596405	0.660681	1	Mother	0.71574	0.584371	0.832558	0.717612	0.425931	0.383179	0.91205	1.52837	0.0523542	1	Mother
427	3.26899	1	24	0.3	-0.66	0.672657	CM	1	7	1	Primary 6 or lower	0	2		0	1	0	1	0	0	2	0	0	-0.901201	-1.03531	-0.505546	-0.821421	-0.309675	-0.106339	0.0383321	-0.546779	0.22885	1	Mother	-0.827852	-0.443805	-0.728345	-0.959467	-0.788114	-1.46359	-0.466374	-0.679316	-0.263058	2	Mother
428	1.60712	2	0	-0.1	0.97	-0.577331	SMA	2	7	0	Secondary or higher	0	2		0	1	0	0	0	0	1	1	1	2.25576	1.44898	2.55296	0.704881	1.84876	0.429264	0.584521	-0.244261	2.37775	2	Mother
428	1.60712	2	6	-0.1	0.97	-0.577331	SMA	2	7	0	Secondary or higher	0	2		0	1	0	0	0	0	1	1	1
428	1.60712	2	12	-0.1	0.97	-0.577331	SMA	2	7	0	Secondary or higher	0	2		0	1	0	0	0	0	1	1	1	0.0233633	0.27127	-1.15224	0.247278	0.572178	0.222882	0.185309	0.2556	-1.05391	1	Mother	1.42106	0.813125	1.39093	1.83692	0.807816	2.33379	1.32069	2.83089	-0.256229	1	Mother
428	1.60712	2	24	-0.1	0.97	-0.577331	SMA	2	7	0	Secondary or higher	0	2		0	1	0	0	0	0	1	1	1	-0.721767	-1.24353	-0.960592	-0.641921	0.6016	-0.823803	-0.771066	-0.593483	-0.884759	1	Mother	0.320695	-0.33098	0.930617	0.414865	1.0885	0.487932	0.362437	-0.643471	-0.0874974	1	Mother
429	3.83299	1	0	-2.79	-1.7	-0.367663		3	9	1	Secondary or higher		2	0										-0.458712	0.0740722	-0.781791	-0.352988	-0.352084	-0.443474	-0.322068	-0.618506	-0.615483	1	Other
429	3.83299	1	6	-2.79	-1.7	-0.367663		3	9	1	Secondary or higher		2	0										0.595467	0.823525	0.0936637	-0.365612	0.968993	1.30822	1.28104	0.754574	-0.531139	2	Mother
429	3.83299	1	12	-2.79	-1.7	-0.367663		3	9	1	Secondary or higher		2	0										0.540668	-0.0915319	-0.578655	1.34794	0.985507	-1.00212	-0.991692	-0.565762	-0.436194	1	Mother	0.0727681	-0.587348	0.145187	1.06406	-0.468341	1.40679	0.677323	-0.170787	-0.711036	1	Mother
429	3.83299	1	24	-2.79	-1.7	-0.367663		3	9	1	Secondary or higher		2	0										-0.5767	0.0681933	-0.387006	-1.26902	-0.291477	-1.09081	-1.11547	-0.516001	-0.267045	1	Mother	-0.30909	-0.328015	-0.192915	-0.103946	-0.401076	-0.439064	0.138428	-0.159332	-0.381222	1	Mother
430	2.85832	2	0	-0.54	-1.86	1.01085	SMA	2	8	0	Primary 6 or lower	0	2		0	1	0	0	1	0	0	1	1
430	2.85832	2	6	-0.54	-1.86	1.01085	SMA	2	8	0	Primary 6 or lower	0	2		0	1	0	0	1	0	0	1	1	-0.498495	0.0638848	-0.999235	-0.636816	-0.0575352	0.103786	0.308066	-0.603517	0.282172	1	Mother
430	2.85832	2	12	-0.54	-1.86	1.01085	SMA	2	8	0	Primary 6 or lower	0	2		0	1	0	0	1	0	0	1	1	-0.938985	-0.533677	-0.912549	-0.216326	-1.02403	-0.306998	-0.177454	-0.581009	-0.842357	1	Mother	-0.907533	-1.05532	-0.345227	-0.893104	-0.121677	-1.06348	-0.610795	-0.878052	-0.97131	1	Mother
430	2.85832	2	24	-0.54	-1.86	1.01085	SMA	2	8	0	Primary 6 or lower	0	2		0	1	0	0	1	0	0	1	1	-1.30818	-1.03897	-0.715157	-1.53823	-0.667126	-1.22941	-1.26799	-0.529756	-0.0676189	1	Mother	-0.503868	-0.784712	-0.430738	-0.0180055	-0.472847	0.371214	-0.301991	-0.222971	-0.953774	1	Mother
431	2.78987	1	0	-0.15	-0.96	0.846043	CM	1	10	0	Primary 6 or lower	1	2		1	1	3	1	0	0	2	0	0	1.39842	0.912966	2.13882	-0.326705	1.25038	0.597458	0.628442	0.228679	-0.791085	1	Other
431	2.78987	1	6	-0.15	-0.96	0.846043	CM	1	10	0	Primary 6 or lower	1	2		1	1	3	1	0	0	2	0	0	-0.523957	-0.345264	-0.103207	0.0923358	-1.02084	0.315054	0.290488	0.254035	0.496141	1	Mother
431	2.78987	1	12	-0.15	-0.96	0.846043	CM	1	10	0	Primary 6 or lower	1	2		1	1	3	1	0	0	2	0	0	0.034242	-0.934992	1.94261	-1.21618	0.300317	-0.208083	-0.0487234	-0.619862	-0.620092	1	Other	1.41531	1.81043	1.19273	0.295598	1.57416	0.225503	0.351363	1.37359	1.82986	1	Other
431	2.78987	1	24	-0.15	-0.96	0.846043	CM	1	10	0	Primary 6 or lower	1	2		1	1	3	1	0	0	2	0	0	-0.834967	-1.11017	-0.595365	-0.377615	-0.323464	-0.53627	-0.450031	-0.570101	-0.450943	1	Other	0.370214	0.78328	0.243596	-0.3643	0.574306	-0.530178	-0.187532	0.434367	0.871024	1	Other
432	2.08898	2	0	-0.28	-1.35	0.481456	CM	1	9	0	Secondary or higher	0	2		1	1	0	1	0	1	2	1	1	-1.15927	-0.818745	-1.25459	0.260799	-1.40314	-1.41441	-1.56201	-0.220397	-1.14424	1	Other
432	2.08898	2	6	-0.28	-1.35	0.481456	CM	1	9	0	Secondary or higher	0	2		1	1	0	1	0	1	2	1	1	-1.34185	-0.733878	-1.15276	-0.616535	-1.38751	-0.256528	-0.370178	0.255465	0.146669	1	Other
432	2.08898	2	12	-0.28	-1.35	0.481456	CM	1	9	0	Secondary or higher	0	2		1	1	0	1	0	1	2	1	1	-0.163587	-0.319329	0.112638	0.234724	-0.393035	-0.660327	-0.848575	0.280278	-0.970025	1	Other	-0.0426756	-0.286754	0.426422	-0.399879	0.947013	-0.225767	-0.417732	0.458582	-0.575916	1	Other
432	2.08898	2	24	-0.28	-1.35	0.481456	CM	1	9	0	Secondary or higher	0	2		1	1	0	1	0	1	2	1	1	-1.28129	-0.160039	-0.866073	-1.51829	-1.3435	-0.988924	-0.972767	-0.568941	-0.801337	1	Other	-0.86776	-0.1454	-1.01227	-1.94993	0.159817	-1.52745	-2.00583	-0.798426	0.236245	2	Other
433	3.56468	2	0	0.8	0.43	-0.02089	CM	1	9	1	Primary 6 or lower	0	2		0	0	1	1	0	0	2	0	0	2.12399	2.09507	0.976605	0.655558	2.23268	2.16008	1.71668	2.54922	1.50625	2	Other
433	3.56468	2	6	0.8	0.43	-0.02089	CM	1	9	1	Primary 6 or lower	0	2		0	0	1	1	0	0	2	0	0	-1.13535	-1.13646	-0.83213	-0.658891	-0.685084	-0.962213	-0.945534	-0.560128	0.429659	1	Other
433	3.56468	2	12	0.8	0.43	-0.02089	CM	1	9	1	Primary 6 or lower	0	2		0	0	1	1	0	0	2	0	0	-0.968897	-0.411816	-0.766333	-0.235641	-1.32819	-0.790685	-1.03151	0.355801	-0.713306	1	Other	-1.65865	-1.1191	-1.84788	-1.51044	-1.82834	-1.35337	-1.43044	-1.26133	-0.880763	1	Other
433	3.56468	2	24	0.8	0.43	-0.02089	CM	1	9	1	Primary 6 or lower	0	2		0	0	1	1	0	0	2	0	0	-1.21905	-0.92364	-0.576773	-0.692624	-1.29908	-0.761266	-0.74066	-0.493825	-0.546	1	Other	-0.552494	-0.746913	-0.478078	-0.395854	-0.0567453	0.0676542	-0.714536	-0.619665	-0.715625	1	Other
434	1.74949	1	0	0.48	0.08	-0.312634	SMA	2	9	0	Secondary or higher	1	2		0	1	0	0	1	0	1	1	1	1.02247	1.41739	0.770543	0.13145	0.566712	1.6388	1.99567	-0.272267	-0.365706	2	Mother
434	1.74949	1	6	0.48	0.08	-0.312634	SMA	2	9	0	Secondary or higher	1	2		0	1	0	0	1	0	1	1	1	1.58436	1.83716	2.04221	0.549939	0.255744	1.00043	1.106	0.203595	2.12624	1	Mother
434	1.74949	1	12	0.48	0.08	-0.312634	SMA	2	9	0	Secondary or higher	1	2		0	1	0	0	1	0	1	1	1	2.01714	1.9155	2.13621	-0.326361	1.90318	1.43365	1.32018	1.12685	1.60869	1	Other
434	1.74949	1	24	0.48	0.08	-0.312634	SMA	2	9	0	Secondary or higher	1	2		0	1	0	0	1	0	1	1	1	0.27702	-0.272148	-0.0154766	0.0807467	0.952237	0.74334	0.499641	1.17566	0.573571	1	Other	1.34295	1.09231	1.79186	0.534116	2.2022	0.210921	0.757648	1.35927	0.848995	1	Other
435	3.27447	1	0	-1.09	0.02	0.672657	CM	1	9	0	Secondary or higher	1	2		0	1	5	1	0	0	2	1	1	0.837553	0.320192	-0.88832	0.956908	1.91777	-1.84455	-1.65644	-1.54501	-0.709506	1	Mother
435	3.27447	1	6	-1.09	0.02	0.672657	CM	1	9	0	Secondary or higher	1	2		0	1	5	1	0	0	2	1	1
435	3.27447	1	12	-1.09	0.02	0.672657	CM	1	9	0	Secondary or higher	1	2		0	1	5	1	0	0	2	1	1
435	3.27447	1	24	-1.09	0.02	0.672657	CM	1	9	0	Secondary or higher	1	2		0	1	5	1	0	0	2	1	1
436	2.62012	1	0	-1.29	-2.59		CM	1			Not known	0	2		0	1	0	1	0	0	2	1	1	0.0126991	-0.788538	1.32655	-0.322428	-0.0609972	0.93123	1.15753	-0.229149	-0.81966	1	Other
436	2.62012	1	6	-1.29	-2.59		CM	1			Not known	0	2		0	1	0	1	0	0	2	1	1
436	2.62012	1	12	-1.29	-2.59		CM	1			Not known	0	2		0	1	0	1	0	0	2	1	1
436	2.62012	1	24	-1.29	-2.59		CM	1			Not known	0	2		0	1	0	1	0	0	2	1	1
437	4.39151	1	0	0.64	-1.21	0.672657	CM	1	8	1	Primary 6 or lower	0	2		0	0	0	1	1	0	2	0	0	-0.017867	0.162857	1.27447	-1.23094	-0.33573	2.6341	2.39997	2.10569	0.679578	2	Mother
437	4.39151	1	6	0.64	-1.21	0.672657	CM	1	8	1	Primary 6 or lower	0	2		0	0	0	1	1	0	2	0	0	-0.701135	-0.0928376	-0.580221	-0.379616	-0.974342	0.912645	0.949788	0.332676	0.763461	1	Mother
437	4.39151	1	12	0.64	-1.21	0.672657	CM	1	8	1	Primary 6 or lower	0	2		0	0	0	1	1	0	2	0	0	-0.516183	-0.014063	0.294189	-0.824043	-0.959832	1.46602	1.30316	1.25606	0.846883	1	Mother
437	4.39151	1	24	0.64	-1.21	0.672657	CM	1	8	1	Primary 6 or lower	0	2		0	0	0	1	1	0	2	0	0																							-0.736863	-0.144447	-0.916294	-0.781137
438	3.3922	1	0	-0.23	0.33	1.53959	SMA	2	9	0	Primary 6 or lower	0	2		0	1	0	0	0	0	1	1	1
438	3.3922	1	6	-0.23	0.33	1.53959	SMA	2	9	0	Primary 6 or lower	0	2		0	1	0	0	0	0	1	1	1	-0.192057	0.0980091	-0.363124	0.939041	-1.00088	0.776626	1.08864	-0.611048	1.21142	1	Mother
438	3.3922	1	12	-0.23	0.33	1.53959	SMA	2	9	0	Primary 6 or lower	0	2		0	1	0	0	0	0	1	1	1	-0.501741	-0.825752	-0.65594	-0.369613	0.320439	1.33206	1.44411	0.313016	-0.504407	1	Mother	1.18592	0.781298	1.37939	1.5555	0.485587	0.999357	1.81448	0.330584	0.92786	1	Mother
438	3.3922	1	24	-0.23	0.33	1.53959	SMA	2	9	0	Primary 6 or lower	0	2		0	1	0	0	0	0	1	1	1	-0.875978	-0.667768	-0.466381	-0.394654	-0.956865	0.28373	0.763589	-1.43545	-0.337102	1	Mother	1.46303	1.62129	1.40493	0.637665	1.61691	0.24003	0.852966	1.92292	1.25408	1	Mother
439	3.04175	1	0	-0.51	-1.64	-0.714437	CM	1	8	0	Primary 6 or lower	0	2		0	1	0	1	0	1	2	0	0	-0.679985	-0.38661	-0.152816	-1.19693	-0.375253	-0.801733	-0.443149	-1.55654	1.65339	1	Other
439	3.04175	1	6	-0.51	-1.64	-0.714437	CM	1	8	0	Primary 6 or lower	0	2		0	1	0	1	0	1	2	0	0	0.125363	0.0270686	-0.448243	-0.345538	0.945664	1.30839	1.99172	-1.53199	0.535778	1	Other
439	3.04175	1	12	-0.51	-1.64	-0.714437	CM	1	8	0	Primary 6 or lower	0	2		0	1	0	1	0	1	2	0	0	0.563518	0.447276	0.0440545	0.936765	0.308174	0.550687	0.824937	-0.606574	0.626114	1	Other
439	3.04175	1	24	-0.51	-1.64	-0.714437	CM	1	8	0	Primary 6 or lower	0	2		0	1	0	1	0	1	2	0	0	0.435758	-0.0667244	-0.548889	0.0481865	1.64328	1.1768	0.974926	1.23966	1.39163	1	Other	0.631066	1.6932	0.187576	-0.658971	0.428951	-1.26669	-0.114824	1.14778	1.75641	2	Other
440	2.91855	2	0	-3.39	-2.61	-1.10672	SMA	2	9	0	Primary 7	0	2		0	1	0	0	1	0	0	1	1	0.555666	1.65745	-1.09636	-0.192044	0.907358	0.745851	0.507672	1.16895	3.19904	1	Mother
440	2.91855	2	6	-3.39	-2.61	-1.10672	SMA	2	9	0	Primary 7	0	2		0	1	0	0	1	0	0	1	1	0.244973	-0.272325	-0.610856	1.09116	0.595427	-0.0171966	-0.109492	0.294921	2.68287	1	Mother
440	2.91855	2	12	-3.39	-2.61	-1.10672	SMA	2	9	0	Primary 7	0	2		0	1	0	0	1	0	0	1	1	3.90415	2.15078	4.55296	0.646728	3.87595	0.416432	0.105108	1.21831	2.76629	2	Mother	2.42147	3.05034	1.74119	1.53205	1.16805	1.12781	1.70547	1.35093	3.54976	1	Mother
440	2.91855	2	24	-3.39	-2.61	-1.10672	SMA	2	9	0	Primary 7	0	2		0	1	0	0	1	0	0	1	1	-0.43424	-1.03201	-0.706802	-0.243505	0.640562	-0.26484	-0.428682	0.371258	0.540274	1	Mother	1.39239	1.80466	1.04763	0.886713	0.606511	0.385797	1.17883	2.00959	1.47683	1	Mother
441	4.00821	1	0	-1.6	2.09	-1.92814		3	7	0	Not known		2	0										-1.05759	-0.902786	-0.74837	-0.357403	-1.00016	0.900074	0.953649	0.289016	-0.585986	1	Mother
441	4.00821	1	6	-1.6	2.09	-1.92814		3	7	0	Not known		2	0										-0.125803	-0.151157	-0.650196	0.0615692	0.321321	0.61808	0.893647	-0.584337	-0.499337	1	Mother
441	4.00821	1	12	-1.6	2.09	-1.92814		3	7	0	Not known		2	0										-0.312417	-0.74132	-0.554633	0.0489453	0.335992	0.334032	0.554017	-0.559525	-0.414993	1	Mother
441	4.00821	1	24	-1.6	2.09	-1.92814		3	7	0	Not known		2	0																																-0.10995	-0.140983	0.770116	-0.795699
442	3.5154	1	0	-0.21	1.77	0.672657	CM	1	14	0	Primary 7	0	2		0	1	0	1	1	0	2	1	1	0.370831	0.358491	-0.842367	1.38278	0.291819	-0.131893	-0.231901	0.26461	0.532091	1	Mother
442	3.5154	1	6	-0.21	1.77	0.672657	CM	1	14	0	Primary 7	0	2		0	1	0	1	1	0	2	1	1	1.05277	1.10794	0.423034	0.506272	0.959693	1.14081	0.954905	1.18827	-0.584603	1	Mother
442	3.5154	1	12	-0.21	1.77	0.672657	CM	1	14	0	Primary 7	0	2		0	1	0	1	1	0	2	1	1	1.48824	1.85957	0.911154	0.493303	0.974765	1.09831	1.17244	0.314914	-0.497955	1	Mother	-0.401949	-0.841691	-0.0766699	-0.0822509	0.069446	0.194487	-0.27086	-1.55824	-0.348213	1	Mother
442	3.5154	1	24	-0.21	1.77	0.672657	CM	1	14	0	Primary 7	0	2		0	1	0	1	1	0	2	1	1	-0.373943	0.00943884	0.322388	-1.25971	-0.3023	0.889465	1.18701	-0.534305	-0.329266	7	Mother	0.37579	-0.349478	1.17316	0.527144	1.20307	-0.0170194	0.866854	-0.280114	-0.341462	1	Mother
443	2.29979	1	0	0.59	1.21	0.21676	SMA	2	8	0	Secondary or higher	0	2		0	1	0	0	1	0	1	1	1	-0.647046	-0.16965	-1.07422	0.549525	-1.05018	-1.8711	-1.94436	-0.694436	-0.873585	1	Mother
443	2.29979	1	6	0.59	1.21	0.21676	SMA	2	8	0	Secondary or higher	0	2		0	1	0	0	1	0	1	1	1	0.0348956	0.244899	-0.198769	0.536901	-0.382308	-0.718146	-1.03509	0.678644	-0.789241	1	Mother
443	2.29979	1	12	0.59	1.21	0.21676	SMA	2	8	0	Secondary or higher	0	2		0	1	0	0	1	0	1	1	1	-0.271426	-0.339606	-0.87631	0.091439	0.286608	-0.278353	-0.3979	0.255797	-0.698905	1	Mother
443	2.29979	1	24	0.59	1.21	0.21676	SMA	2	8	0	Secondary or higher	0	2		0	1	0	0	1	0	1	1	1	-0.394477	-0.177705	-0.682051	0.92966	-0.989975	-0.484735	-0.519579	-0.143186	0.673586	1	Mother	-0.359755	-0.0886388	-0.857498	-0.271414	-0.833199	0.4087	-0.7425	0.28585	-0.244647	1	Mother
444	3.93703	1	0	-1.24	-1.66	0.49927	CM	1	7	0	Secondary or higher	0	2		0	0	0	1	0	0	2	0	0	1.04302	-0.244294	0.797836	1.37216	1.28397	-1.86486	-1.69382	-1.5122	-0.597969	1	Mother
444	3.93703	1	6	-1.24	-1.66	0.49927	CM	1	7	0	Secondary or higher	0	2		0	0	0	1	0	0	2	0	0	-0.882387	-1.50644	-0.668995	0.0640526	-0.334768	-1.31271	-1.61924	0.309626	-0.515929	1	Mother
444	3.93703	1	12	-1.24	-1.66	0.49927	CM	1	7	0	Secondary or higher	0	2		0	0	0	1	0	0	2	0	0	0.296209	-0.756553	0.206982	1.34718	0.333186	-0.2791	-0.709549	1.23342	-0.431125	1	Mother	-0.136564	0.125649	-0.702072	-0.0684999	-0.673352	0.599187	-0.571759	0.472838	-0.0568236	1	Mother
444	3.93703	1	24	-1.24	-1.66	0.49927	CM	1	7	0	Secondary or higher	0	2		0	0	0	1	0	0	2	0	0	-0.201099	0.0725455	-0.381784	0.0261118	-0.290675	-0.368198	-0.278674	-0.514645	-0.262436	1	Mother	0.364826	0.0330974	-0.185479	0.794948	0.0334208	2.02294	-0.272759	0.166507	-0.050072	1	Mother
445	3.16496	2	0	-2.93	-2.32	-0.714437	SMA	2	13	0	Primary 7	0	2		0	1	0	0	1	0	0	1	1	2.19897	2.36643	1.68026	1.52951	0.914573	1.02233	1.37798	-0.616533	-0.963111	2	Mother
445	3.16496	2	6	-2.93	-2.32	-0.714437	SMA	2	13	0	Primary 7	0	2		0	1	0	0	1	0	0	1	1	0.291383	0.792447	-0.928738	1.08164	-0.0467125	-0.559237	-0.745509	0.313632	1.54543	1	Mother
445	3.16496	2	12	-2.93	-2.32	-0.714437	SMA	2	13	0	Primary 7	0	2		0	1	0	0	1	0	0	1	1	0.724494	-0.468394	-0.834219	2.36497	1.2742	1.07189	0.995527	0.787596	0.427816	1	Mother	1.3529	0.852768	0.866174	1.92008	0.419895	2.88884	0.979493	1.47439	0.452146	1	Mother
445	3.16496	2	24	-2.93	-2.32	-0.714437	SMA	2	13	0	Primary 7	0	2		0	1	0	0	1	0	0	1	1	-0.76713	-0.31128	-0.645704	-0.683518	-0.656464	-0.45626	-0.379663	-0.511723	-0.606839	1	Mother	0.3014	0.287278	0.401404	0.238148	0.269147	-0.0526536	0.435697	1.16359	-0.189924	1	Mother
446	3.03354	1	0	-2.07	-1.64	0.325883	SMA	2	8	0	Primary 6 or lower	0	2		0	1	0	0	1	0	0	1	1	1.30428	0.951701	1.01546	-0.332845	1.91072	2.19078	2.0534	1.58901	1.05149	2	Other
446	3.03354	1	6	-2.07	-1.64	0.325883	SMA	2	8	0	Primary 6 or lower	0	2		0	1	0	0	1	0	0	1	1	0.747778	2.0391	0.334782	-0.777893	0.292942	0.472609	0.606566	-0.182914	2.3401	3	Other
446	3.03354	1	12	-2.07	-1.64	0.325883	SMA	2	8	0	Primary 6 or lower	0	2		0	1	0	0	1	0	0	1	1	-0.679966	-0.895823	-0.350069	-1.22239	0.307532	0.5474	0.544051	0.291186	-0.578611	1	Other
446	3.03354	1	24	-2.07	-1.64	0.325883	SMA	2	8	0	Primary 6 or lower	0	2		0	1	0	0	1	0	0	1	1	1.05952	0.94234	1.01612	0.0474966	0.990879	1.06116	1.39542	-0.556677	0.795723	1	Other	0.973364	1.93736	0.317218	-0.0141305	0.223175	-0.439947	0.312702	3.05808	1.12107	1	Other
447	7.12115	2	0	-0.52	-0.71	-0.209363	CM	1	16	1	Secondary or higher	1	2		0	1	1	1	0	0	2	0	1																							-0.143115	-0.284144	0.811691	-0.722395
447	7.12115	2	6	-0.52	-0.71	-0.209363	CM	1	16	1	Secondary or higher	1	2		0	1	1	1	0	0	2	0	1																							-0.606623	-1.54393	0.408604	0.0462495
447	7.12115	2	12	-0.52	-0.71	-0.209363	CM	1	16	1	Secondary or higher	1	2		0	1	1	1	0	0	2	0	1																							-0.912263	-0.923329	-0.419778	-0.670001
447	7.12115	2	24	-0.52	-0.71	-0.209363	CM	1	16	1	Secondary or higher	1	2		0	1	1	1	0	0	2	0	1																							-0.415586	-0.308881	-0.378316	-0.247439
448	2.43669	1	0	-1.59	-0.96	-0.0479372	SMA	2	9	0	Secondary or higher	0	2		0	1	0	0	1	0	0	1	1	-0.00983369	0.187015	-0.268222	-0.317807	0.260233	-0.7728	-0.952041	0.211188	-0.250021	1	Mother
448	2.43669	1	6	-1.59	-0.96	-0.0479372	SMA	2	9	0	Secondary or higher	0	2		0	1	0	0	1	0	0	1	1	1.31134	1.63065	1.41637	0.0976476	0.605995	1.12166	1.2296	0.243594	2.26221	2	Mother
448	2.43669	1	12	-1.59	-0.96	-0.0479372	SMA	2	9	0	Secondary or higher	0	2		0	1	0	0	1	0	0	1	1	1.85239	1.01872	1.48582	1.3843	1.59646	0.218316	0.452717	-0.637217	-0.679087	7	Mother	1.00227	0.86052	0.608714	0.67943	1.04942	1.7441	-0.172561	-0.00850001	1.23159	1	Mother
448	2.43669	1	24	-1.59	-0.96	-0.0479372	SMA	2	9	0	Secondary or higher	0	2		0	1	0	0	1	0	0	1	1	-0.754272	-0.83141	-0.662729	-0.368716	-0.333806	-1.06828	-0.781611	-1.48644	-0.510399	1	Mother	-0.0991637	0.183203	0.025457	-0.870623	0.689068	-0.920295	-0.712273	0.318953	0.110768	1	Mother
449	2.60096	2	0	-2.41	-2.33	-0.842027	SMA	2	9	0	Primary 6 or lower	0	2		0	1	0	0	0	0	0	1	1	-1.09638	-0.0675513	-1.15694	-0.615983	-1.38815	-1.33756	-1.3449	-0.644464	-1.05806	1	Mother
449	2.60096	2	6	-2.41	-2.33	-0.842027	SMA	2	9	0	Primary 6 or lower	0	2		0	1	0	0	0	0	0	1	1	-1.40505	-1.65982	-1.05824	-0.629021	-0.719797	-0.421649	-0.571879	0.280006	-0.970947	1	Mother
449	2.60096	2	12	-2.41	-2.33	-0.842027	SMA	2	9	0	Primary 6 or lower	0	2		0	1	0	0	0	0	0	1	1	-0.103051	0.0939147	-0.963203	0.654248	-0.0520036	-1.06536	-1.05069	-0.594161	-0.887064	1	Mother
449	2.60096	2	24	-2.41	-2.33	-0.842027	SMA	2	9	0	Primary 6 or lower	0	2		0	1	0	0	0	0	0	1	1	-0.104041	0.253205	-0.772077	-0.666824	0.630541	-0.076707	-0.342286	0.803731	0.482662	1	Mother
450	3.83025	1	0	-0.32	-0.69	1.53959	CM	1	10	0	Primary 6 or lower	0	2		0	0	1	1	0	0	2	0	0	2.2707	1.74816	2.7272	0.510963	1.60744	1.11286	1.20395	0.280203	1.18561	2	Mother
450	3.83025	1	6	-0.32	-0.69	1.53959	CM	1	10	0	Primary 6 or lower	0	2		0	0	1	1	0	0	2	0	0	-0.147327	-0.513915	0.0962748	-0.365957	0.316191	0.59178	0.5893	0.30583	0.672203	1	Mother
450	3.83025	1	12	-0.32	-0.69	1.53959	CM	1	10	0	Primary 6 or lower	0	2		0	0	1	1	0	0	2	0	0	-0.580755	-0.767433	-0.585965	0.0530843	-0.322021	-0.169624	-0.442489	0.780607	0.758391	1	Mother	0.555246	0.450876	0.501393	0.161281	1.01492	0.576401	-0.172827	-0.183313	0.726118	1	Mother
450	3.83025	1	24	-0.32	-0.69	1.53959	CM	1	10	0	Primary 6 or lower	0	2		0	0	1	1	0	0	2	0	0	-0.333586	0.0616651	-0.394839	-0.404105	-0.292679	-0.258721	-0.289148	-0.0686121	-0.273959	1	Mother	0.448668	0.358324	0.284752	0.00851772	1.08142	0.637438	-0.50286	0.461032	0.249625	1	Mother
451	5.57974	2	0	-1.03	-1.26	1.01943	CM	1	7	1	Secondary or higher	0	2		1	1	0	1	0	0	2	1	1	1.00664	0.0710624	-0.588784	3.19643	0.65868	-0.171969	-0.195229	-0.0475214	0.644437	1	Mother
451	5.57974	2	6	-1.03	-1.26	1.01943	CM	1	7	1	Secondary or higher	0	2		1	1	0	1	0	0	2	1	1																							0.626264	-0.898528	0.345481	2.19364
451	5.57974	2	12	-1.03	-1.26	1.01943	CM	1	7	1	Secondary or higher	0	2		1	1	0	1	0	0	2	1	1																							0.481607	-0.279449	-0.477759	1.85477
451	5.57974	2	24	-1.03	-1.26	1.01943	CM	1	7	1	Secondary or higher	0	2		1	1	0	1	0	0	2	1	1																							-0.291407	-0.289745	-0.44297	0.0431196
452	1.87269	1	0	-2.69	-1.74	-0.0479372	SMA	2	8	0	Primary 6 or lower	0	2		0	1	0	0	0	0	0	1	1	0.169045	-0.237544	0.794042	-0.303596	0.243718	-0.617953	-0.344513	-1.16501	0.255553	1	Mother
452	1.87269	1	6	-2.69	-1.74	-0.0479372	SMA	2	8	0	Primary 6 or lower	0	2		0	1	0	0	0	0	0	1	1	-0.756664	-0.48584	-1.05177	-0.317324	-0.393531	-1.01518	-1.37127	0.659662	-0.853767	1	Mother
452	1.87269	1	12	-2.69	-1.74	-0.0479372	SMA	2	8	0	Primary 6 or lower	0	2		0	1	0	0	0	0	0	1	1	0.547356	0.265789	-0.173704	1.39747	0.274743	-1.41692	-1.15374	-1.56196	0.43392	1	Other	-0.417634	-0.153984	-0.633177	-0.649245	-0.377209	-0.0652398	-0.957631	0.137508	-0.228712	1	Other
452	1.87269	1	24	-2.69	-1.74	-0.0479372	SMA	2	8	0	Primary 6 or lower	0	2		0	1	0	0	0	0	0	1	1	-0.693755	-0.243858	-0.761425	0.0762627	-1.00216	-0.786697	-0.444495	-1.51206	-0.597508	1	Mother	0.0306225	0.106374	0.373726	-0.164935	0.117669	-0.82001	0.391394	0.149858	0.102	1	Mother
453	1.84805	1	0	-0.49	-0.89	-0.312634	SMA	2	8	0	Primary 6 or lower	0	2		1	1	0	0	0	0	0	1	1	-0.20622	-1.91598	-0.380496	1.42479	0.569598	-0.382152	-0.209517	-0.716808	-0.349114	2	Mother
453	1.84805	1	6	-0.49	-0.89	-0.312634	SMA	2	8	0	Primary 6 or lower	0	2		1	1	0	0	0	0	0	1	1	-0.64032	-0.49585	0.106058	-0.315737	-1.04858	-0.904878	-0.825843	-0.691724	-0.864367	1	Mother
453	1.84805	1	12	-0.49	-0.89	-0.312634	SMA	2	8	0	Primary 6 or lower	0	2		1	1	0	0	0	0	0	1	1	-1.07543	-0.41664	-0.578794	-1.19217	-1.03399	-0.590588	-0.472057	-0.667047	-0.780484	1	Mother
453	1.84805	1	24	-0.49	-0.89	-0.312634	SMA	2	8	0	Primary 6 or lower	0	2		1	1	0	0	0	0	0	1	1	-0.579429	-0.25648	-0.386623	0.0782632	-1.00449	-0.918364	-1.01171	-0.167728	-0.610874	1	Mother	-0.939933	-0.391172	-1.35872	-1.08227	-1.18506	-0.573898	-1.30972	0.123913	-0.568388	1	Mother
454	3.77823	1	0	-0.46	-2.27	-0.367663	CM	1	9	0	Secondary or higher	0	2		0	1	2	1	0	0	2	1	1	0.0308789	-0.269536	1.15749	-1.21549	0.299516	1.7038	1.61229	1.17647	-0.624701	1	Other
454	3.77823	1	6	-0.46	-2.27	-0.367663	CM	1	9	0	Secondary or higher	0	2		0	1	2	1	0	0	2	1	1	0.218185	-0.857523	0.865723	-0.364577	0.96779	0.823061	0.58092	1.20196	-0.538052	1	Other
454	3.77823	1	12	-0.46	-2.27	-0.367663	CM	1	9	0	Secondary or higher	0	2		0	1	2	1	0	0	2	1	1	-0.34134	-0.108941	-0.209597	-0.377063	-0.324105	0.418441	0.656753	-0.571185	0.746408	1	Other	1.46707	1.00898	1.70411	1.15225	1.84873	1.09779	1.064	0.427209	1.186	1	Other
454	3.77823	1	24	-0.46	-2.27	-0.367663	CM	1	9	0	Secondary or higher	0	2		0	1	2	1	0	0	2	1	1	0.278067	0.0503493	-0.0184707	-0.402311	1.01164	0.0898441	0.532561	-1.4204	-0.285942	1	Mother	1.5263	1.15034	1.48747	1.25354	1.70181	1.43137	0.943646	1.38845	0.870586	1	Mother
456	3.93155	2	0	0.46	-0.2	0.846043		3	7	1	Primary 6 or lower		2	0										-0.560693	-0.860747	-0.90315	0.214373	-0.0427842	1.1374	1.49529	-0.578568	1.56801	1	Mother
456	3.93155	2	6	0.46	-0.2	0.846043		3	7	1	Primary 6 or lower		2	0										1.6102	1.22832	0.752197	1.49757	1.27829	2.4101	1.98826	2.5922	2.25288	2	Mother
456	3.93155	2	12	0.46	-0.2	0.846043		3	7	1	Primary 6 or lower		2	0										0.68012	1.30927	0.0694346	0.62086	-0.013202	0.810032	1.37236	-1.42738	0.537048	1	Mother	1.21911	0.627952	1.53125	2.02315	0.174309	1.19705	2.43118	-0.214919	0.987295	1	Mother
456	3.93155	2	24	0.46	-0.2	0.846043		3	7	1	Primary 6 or lower		2	0										-0.933902	-0.875766	-0.519331	-1.56409	0.0161396	-0.117314	-0.000739507	-0.47891	-0.495302	1	Mother	-1.15353	-1.10194	-1.0073	-0.797163	-1.03974	-0.922263	-0.624672	-1.15503	-0.938935	2	Mother
457	4.36687	2	0	1.3	-0.05	-0.367663		3	8	1	Primary 6 or lower		2	0										-0.50722	-0.121739	-0.430174	-0.660477	-0.356639	-0.952762	-0.935898	-0.55701	-0.760778	1	Mother
457	4.36687	2	6	1.3	-0.05	-0.367663		3	8	1	Primary 6 or lower		2	0
457	4.36687	2	12	1.3	-0.05	-0.367663		3	8	1	Primary 6 or lower		2	0										-0.752333	-0.961939	-0.622727	0.177329	-0.652937	-1.27643	-1.05506	-1.4046	-0.586559	1	Mother	-0.038501	-0.135422	-0.421315	0.407893	-0.550898	1.07762	-0.157393	-0.0646126	-0.150382	1	Mother
457	4.36687	2	24	1.3	-0.05	-0.367663		3	8	1	Primary 6 or lower		2	0																																-0.791314	-1.21574	-0.490558	-0.0160781
458	8.54483	2	0	1.57	0.58	0.0954987	CM	1	14	1	Secondary or higher	0	2		0	0	0	1	0	0	2	0	0																							-0.27139	-1.55442	0.444049	0.832313
458	8.54483	2	6	1.57	0.58	0.0954987	CM	1	14	1	Secondary or higher	0	2		0	0	0	1	0	0	2	0	0																							0.373694	0.319005	0.0422749	0.489633
458	8.54483	2	12	1.57	0.58	0.0954987	CM	1	14	1	Secondary or higher	0	2		0	0	0	1	0	0	2	0	0																							1.17884	0.937988	1.76654	0.151172
458	8.54483	2	24	1.57	0.58	0.0954987	CM	1	14	1	Secondary or higher	0	2		0	0	0	1	0	0	2	0	0																							0.248938	0.613554	-0.318693	0.197714
459	2.08898	2	0	-2.08	-0.97	-0.0479372		3	15	1	Primary 6 or lower		2	0										-1.15927	-1.48855	-1.25459	1.12468	-1.40314	-2.01316	-2.11708	-0.66982	-1.14424	1	Mother
459	2.08898	2	6	-2.08	-0.97	-0.0479372		3	15	1	Primary 6 or lower		2	0										-1.59202	-2.07611	-1.1559	0.247761	-1.38799	-0.498494	-0.650225	0.254651	0.143903	1	Mother
459	2.08898	2	12	-2.08	-0.97	-0.0479372		3	15	1	Primary 6 or lower		2	0										-1.03483	-1.32752	-1.06138	1.09916	-1.37348	-1.86111	-1.96206	-0.619652	-0.973712	1	Mother	-0.880266	-1.11363	-0.312761	-1.04278	0.300622	-0.778145	-1.0533	-1.13304	-0.905269	1	Mother
459	2.08898	2	24	-2.08	-0.97	-0.0479372		3	15	1	Primary 6 or lower		2	0										-1.40806	-0.498424	-0.870251	-1.51774	-1.34414	-0.992211	-0.976119	-0.570026	-0.805024	1	Mother	-1.04211	-0.972274	-1.01822	-0.814463	-0.913423	-0.444565	-0.963979	-0.488691	-1.0596	1	Mother
461	4.19986	2	0	0.24	-0.75	0.846043		3	8	0	Primary 7		2	1										1.45754	1.52623	1.09776	0.207613	1.27148	1.05792	1.39758	-0.565281	-0.788893	2	Other
461	4.19986	2	6	0.24	-0.75	0.846043		3	8	0	Primary 7		2	1										0.159252	-0.397019	-0.748578	1.05784	0.634149	0.061535	0.231635	-0.538434	-0.697635	1	Other
461	4.19986	2	12	0.24	-0.75	0.846043		3	8	0	Primary 7		2	1										2.4512	1.01833	1.68196	1.04583	3.26091	2.40828	2.24727	1.73227	-0.0169203	2	Mother
461	4.19986	2	24	0.24	-0.75	0.846043		3	8	0	Primary 7		2	1																																0.313644	0.352711	-0.496138	0.718953
462	2.56263	1	0	1.46	-0.87	0.481456	CM	1	8	0	Primary 6 or lower	0	2		0	1	1	1	0	0	2	0	0	-0.490681	-1.13258	-1.02409	0.974844	-0.0626807	1.76085	1.7038	1.11627	0.371699	1	Mother
462	2.56263	1	6	1.46	-0.87	0.481456	CM	1	8	0	Primary 6 or lower	0	2		0	1	1	1	0	0	2	0	0	-0.556915	-1.05772	-0.544328	1.39492	-1.0287	0.634032	0.66573	0.240747	0.450973	1	Mother
462	2.56263	1	12	1.46	-0.87	0.481456	CM	1	8	0	Primary 6 or lower	0	2		0	1	1	1	0	0	2	0	0	-1.1161	-0.978514	-0.839233	-0.3454	-1.01411	-0.249177	-0.09062	-0.633421	-0.666182	1	Mother	0.424203	0.538369	1.11836	-0.563648	1.49768	-1.5009	0.269669	0.0165509	0.773506	1	Mother
462	2.56263	1	24	1.46	-0.87	0.481456	CM	1	8	0	Primary 6 or lower	0	2		0	1	1	1	0	0	2	0	0	-0.993014	-1.48903	-0.648107	-0.370648	-0.331561	-0.458024	-0.353579	-0.583795	0.103025	1	Mother	-1.45101	-0.957619	-1.42019	-1.47857	-1.42376	-1.71241	-1.10876	-0.923564	-0.83056	2	Mother
463	4.63244	2	0	-2.24	-1.49	-0.367663		3	11	1	Primary 7		2	0
463	4.63244	2	6	-2.24	-1.49	-0.367663		3	11	1	Primary 7		2	0										-0.406663	-0.326513	0.115911	0.61472	-1.31247	0.846605	0.577042	1.28122	-0.62297	1	Mother
463	4.63244	2	12	-2.24	-1.49	-0.367663		3	11	1	Primary 7		2	0										0.647517	1.09275	-0.178472	0.602096	0.335205	1.28106	0.792479	2.20488	0.662412	2	Mother	1.17796	1.02379	1.00029	1.144	0.809188	1.17241	0.97596	1.296	0.748489	1	Mother
463	4.63244	2	24	-2.24	-1.49	-0.367663		3	11	1	Primary 7		2	0																																-0.626293	-0.279449	-0.902288	-0.371142
465	2.58179	1	0	0.51	0.06	-1.37142		3	7	0	Not known		2	1										-0.488327	-0.124823	-0.630492	-0.321463	-0.388721	-0.87077	-0.513535	-1.57931	1.57596	1	Mother
465	2.58179	1	6	0.51	0.06	-1.37142		3	7	0	Not known		2	1										1.19567	2.31134	0.259585	-0.336018	0.9346	-0.185314	0.268701	-1.55071	0.472174	1	Other
465	2.58179	1	12	0.51	0.06	-1.37142		3	7	0	Not known		2	1										-0.234432	0.378076	-0.818868	-0.780031	0.295427	-0.71215	-0.351814	-1.52698	-0.648207	1	Other
465	2.58179	1	24	0.51	0.06	-1.37142		3	7	0	Not known		2	1
467	2.06708	2	0	-0.69	0.11	0.21676	SMA	2	8	0	Secondary or higher	0	2		1	1	0	0	1	0	1	1	1	0.947391	0.517389	3.42058	-0.602531	-0.42398	1.09705	1.48751	-0.670904	-0.547412	2	Mother
467	2.06708	2	6	-0.69	0.11	0.21676	SMA	2	8	0	Secondary or higher	0	2		1	1	0	0	1	0	1	1	1	-0.479344	-0.0719035	-0.38227	-0.615293	-0.409149	-1.46142	-1.21032	-1.54466	-1.06266	1	Mother
467	2.06708	2	12	-0.69	0.11	0.21676	SMA	2	8	0	Secondary or higher	0	2		1	1	0	0	1	0	1	1	1	0.0795272	-0.660761	1.66459	-0.628124	-0.0676363	0.0520082	-0.299792	1.17709	0.224099	1	Mother	0.438734	-0.0682278	1.27071	0.220689	1.36239	-0.239439	0.618405	-1.1393	0.538177	2	Mother
467	2.06708	2	24	-0.69	0.11	0.21676	SMA	2	8	0	Secondary or higher	0	2		1	1	0	0	1	0	1	1	1	0.450775	0.168337	1.85571	-0.653372	-0.0382948	-0.0370893	0.131084	-0.570975	-0.80825	1	Mother	0.774315	-0.16078	1.17627	1.08414	1.42889	1.7294	0.498049	-0.178062	-0.0993992	1	Mother
468	3.52088	2	0	-1.22	-1.28	0.152497	SMA	2	7	0	Primary 6 or lower	1	2		0	1	0	0	0	0	0	1	1	-0.362981	-1.26093	-0.201588	0.656662	-0.0548095	-0.600741	-0.649058	-0.149484	-0.903195	2	Mother
468	3.52088	2	6	-1.22	-1.28	0.152497	SMA	2	7	0	Primary 6 or lower	1	2		0	1	0	0	0	0	0	1	1	-0.918134	-1.1765	-0.880173	0.211338	-0.69246	-0.880269	-0.845312	-0.572602	-0.813781	1	Mother
468	3.52088	2	12	-1.22	-1.28	0.152497	SMA	2	7	0	Primary 6 or lower	1	2		0	1	0	0	0	0	0	1	1	-0.608766	-0.427484	-0.785132	0.198783	-0.677869	-0.20673	-0.0752259	-0.547925	-0.729898	1	Mother	0.34789	-0.220384	0.691667	0.232976	1.34548	0.79417	-0.201783	-0.976642	0.214457	1	Mother
468	3.52088	2	24	-1.22	-1.28	0.152497	SMA	2	7	0	Primary 6 or lower	1	2		0	1	0	0	0	0	0	1	1	-0.981994	-0.938002	-0.594006	-0.690347	-0.648527	-0.056328	0.0781154	-0.4983	-0.56121	1	Mother	-1.08516	-1.24856	-0.624824	-0.55492	-0.935681	-1.0526	-0.112461	-1.28297	-1.06745	2	Mother
469	2.15195	1	0	0.49	-0.51	-0.842027	CM	1	9	1	Primary 6 or lower	0	2		0	0	1	1	0	0	2	1	1	-0.789286	-0.528056	-1.10242	-0.310632	-0.401307	0.62146	0.530823	0.646509	1.5036	1	Mother
469	2.15195	1	6	0.49	-0.51	-0.842027	CM	1	9	1	Primary 6 or lower	0	2		0	0	1	1	0	0	2	1	1	-0.9759	-1.78803	-0.226968	-0.323256	-0.386637	-0.500837	-0.918943	1.12074	0.386908	1	Mother
469	2.15195	1	12	0.49	-0.51	-0.842027	CM	1	9	1	Primary 6 or lower	0	2		0	0	1	1	0	0	2	1	1	-1.1605	-1.03596	-0.908164	-0.336294	-1.02469	0.654578	0.686678	0.247526	-0.72702	1	Mother	-0.324727	-0.415642	0.286962	-0.691805	0.543027	-1.07612	-0.257523	0.215345	-0.633773	1	Mother
469	2.15195	1	24	0.49	-0.51	-0.842027	CM	1	9	1	Primary 6 or lower	0	2		0	0	1	1	0	0	2	1	1	-0.0447718	-0.206865	0.0628537	-0.361542	0.31106	-0.512268	-0.408883	-0.601693	-0.558332	1	Mother	0.121394	-0.157334	0.314732	0.425696	-0.0307455	0.347634	0.460833	0.225906	-0.304858	1	Mother
470	4.5065	2	0	0.9	-0.36	2.57991	CM	1	12	1	Secondary or higher	1	2		1	0	0	1	1	0	2	0	1	0.00624967	0.235361	-0.0135954	1.06377	-1.00575	-0.692304	-0.636997	-0.550095	-0.737272	1	Mother
470	4.5065	2	6	0.9	-0.36	2.57991	CM	1	12	1	Secondary or higher	1	2		1	0	0	1	1	0	2	0	1	-0.550585	-0.687095	-0.694791	0.61879	-0.664	-0.375138	-0.280279	-0.524468	-0.650163	1	Mother
470	4.5065	2	12	0.9	-0.36	2.57991	CM	1	12	1	Secondary or higher	1	2		1	0	0	1	1	0	2	0	1	-0.737535	-0.942789	-0.59975	1.03818	-1.30261	-0.779347	-0.759095	-0.499791	-0.56628	1	Mother	-1.09691	-0.90898	-0.999622	-0.946679	-0.944094	-1.06262	-0.750482	-1.29281	-0.594086	1	Mother
470	4.5065	2	24	0.9	-0.36	2.57991	CM	1	12	1	Secondary or higher	1	2		1	0	0	1	1	0	2	0	1																							-0.788718	-0.903838	-0.910164	-0.00995415
471	3.17864	2	0	-1.27	-2.61	1.3662	CM	1	7	0	Primary 6 or lower	0	2		0	0	0	1	0	0	2	0	0	-0.777258	0.0242798	-1.04676	-0.198597	-1.04463	-0.0533588	-0.00759385	-0.166433	-0.960807	1	Mother
471	3.17864	2	6	-1.27	-2.61	1.3662	CM	1	7	0	Primary 6 or lower	0	2		0	0	0	1	0	0	2	0	0	-0.474617	0.0947852	-0.962159	0.222168	-0.705046	0.132962	0.199046	-0.144468	-0.886142	1	Other
471	3.17864	2	12	-1.27	-2.61	1.3662	CM	1	7	0	Primary 6 or lower	0	2		0	0	0	1	0	0	2	0	0	-1.03448	-0.831588	-0.868162	0.209752	-1.34382	-1.70907	-1.80704	-0.569484	-0.80318	1	Mother	-0.319334	0.0844049	-0.404221	-0.683553	-0.270091	-0.713463	-0.541355	-0.802004	0.554814	1	Other
471	3.17864	2	24	-1.27	-2.61	1.3662	CM	1	7	0	Primary 6 or lower	0	2		0	0	0	1	0	0	2	0	0	-1.28363	-0.337394	-0.677036	-1.54326	-1.31448	-0.959915	-0.959869	-0.519858	-0.634492	1	Other	-1.08915	-1.06072	-0.987479	-0.963343	-0.63044	-0.652426	-1.08107	-1.10834	-0.888171	1	Other
472	7.03901	1	0	0.87	-0.31	0.247929	CM	1	8	1	Secondary or higher	0	2		0	1	0	1	0	0	2	0	0																							-0.881405	-0.152153	-1.31479	-0.748749
472	7.03901	1	6	0.87	-0.31	0.247929	CM	1	8	1	Secondary or higher	0	2		0	1	0	1	0	0	2	0	0																							0.0791256	-0.158272	1.25306	-0.723028
472	7.03901	1	12	0.87	-0.31	0.247929	CM	1	8	1	Secondary or higher	0	2		0	1	0	1	0	0	2	0	0																							-0.860004	-0.790886	-0.425141	-0.698261
472	7.03901	1	24	0.87	-0.31	0.247929	CM	1	8	1	Secondary or higher	0	2		0	1	0	1	0	0	2	0	0																							-0.522291	-0.176048	-0.384992	-0.648317
473	3.47707	1	0	0.92	0.28	-0.714437	SMA	2	6	0	Primary 7	0	2		0	1	0	0	1	0	0	1	1	1.35876	1.35711	0.710106	0.519862	1.2705	1.77835	1.5662	1.61098	1.72668	2	Mother
473	3.47707	1	6	0.92	0.28	-0.714437	SMA	2	6	0	Primary 7	0	2		0	1	0	0	1	0	0	1	1	-1.18503	-1.57695	-0.363646	-0.356713	-1.00096	0.177466	0.116857	0.287661	-0.590595	1	Mother
473	3.47707	1	12	0.92	0.28	-0.714437	SMA	2	6	0	Primary 7	0	2		0	1	0	0	1	0	0	1	1	1.10927	-0.49346	3.63033	0.494683	-0.00664306	1.68884	1.58036	1.21105	-0.507172	2	Mother	-1.08654	-0.394385	-1.19139	-1.37193	-1.2264	-1.73154	-0.916233	0.325216	-0.68835	1	Mother
473	3.47707	1	24	0.92	0.28	-0.714437	SMA	2	6	0	Primary 7	0	2		0	1	0	0	1	0	0	1	1
474	1.7796	1	0	-2.14	-1.66	-0.312634		3	9	0	Primary 6 or lower		2	0										2.26696	2.09199	1.16623	1.85846	1.5474	1.40382	1.72275	-0.270775	1.44092	2	Mother
474	1.7796	1	6	-2.14	-1.66	-0.312634		3	9	0	Primary 6 or lower		2	0										-0.515904	-1.16522	-1.06326	-0.315806	0.911111	0.0535314	0.00717764	0.207256	0.337131	1	Mother
474	1.7796	1	12	-2.14	-1.66	-0.312634		3	9	0	Primary 6 or lower		2	0										-0.215617	-0.427956	-0.592371	0.105443	0.270334	0.356726	0.0721173	1.12712	-0.792467	1	Mother
474	1.7796	1	24	-2.14	-1.66	-0.312634		3	9	0	Primary 6 or lower		2	0										0.404799	1.07226	-0.00973232	-1.21584	0.953119	0.86761	0.781783	0.727727	-0.0218777	7	Mother	0.194035	0.0510081	0.822391	-0.471415	1.35691	-0.869227	-0.0720777	0.101546	0.0534719	1	Mother
475	4.97467	2	0	-2.66	-1.72	1.3662		3	11	1	Secondary or higher		2	1
475	4.97467	2	6	-2.66	-1.72	1.3662		3	11	1	Secondary or higher		2	1										-1.2389	-0.949318	-0.607583	-0.688554	-1.30381	-0.0670123	0.0672222	-0.501825	-0.573193	1	Mother
475	4.97467	2	12	-2.66	-1.72	1.3662		3	11	1	Secondary or higher		2	1										-0.687088	-0.207698	-0.52142	0.163947	-1.29059	-0.478207	-0.418716	-0.479453	-0.497145	1	Mother
475	4.97467	2	24	-2.66	-1.72	1.3662		3	11	1	Secondary or higher		2	1																																-0.14698	-0.281974	0.379832	-0.360527
476	2.31075	1	0	-1.66	-0.37	-0.312634		3	8	0	Primary 7		2	0										3.94524	2.84623	2.82732	3.1409	2.86936	3.16004	2.77539	2.90148	-0.871742	2	Mother
476	2.31075	1	6	-1.66	-0.37	-0.312634		3	8	0	Primary 7		2	0										0.532222	0.916013	-0.977095	0.536694	0.924339	2.27683	2.01904	2.02732	-0.787858	1	Mother
476	2.31075	1	12	-1.66	-0.37	-0.312634		3	8	0	Primary 7		2	0										-0.273107	-0.676687	-0.878921	-0.340157	0.939411	0.198591	0.432606	-0.643725	-0.70121	1	Mother
476	2.31075	1	24	-1.66	-0.37	-0.312634		3	8	0	Primary 7		2	0										-0.522592	-0.182928	-0.688317	-0.365336	-0.337734	-0.609416	-0.524607	-0.594235	-0.532983	1	Mother	2.28038	1.77031	2.31093	2.25746	1.71871	2.03302	2.18319	1.54268	1.67755	1	Mother
477	7.66872	1	0	0.8	-0.46	1.61981	SMA	2	10	1	Secondary or higher	0	2		0	1	0	0	1	0	1	1	1																							-0.235052	0.46712	-0.440567	-0.717449
477	7.66872	1	6	0.8	-0.46	1.61981	SMA	2	10	1	Secondary or higher	0	2		0	1	0	0	1	0	1	1	1																							-0.85712	-1.41922	0.429386	-0.691456
477	7.66872	1	12	0.8	-0.46	1.61981	SMA	2	10	1	Secondary or higher	0	2		0	1	0	0	1	0	1	1	1																							-0.686677	-0.799336	0.0279405	-0.662742
477	7.66872	1	24	0.8	-0.46	1.61981	SMA	2	10	1	Secondary or higher	0	2		0	1	0	0	1	0	1	1	1																							-0.507235	-0.184499	-0.356439	-0.612798
478	2.68857	1	0	-0.34	-0.57	0.746153	CM	1	10	0	Primary 6 or lower	0	2		0	1	2	1	0	0	2	0	0	0.145186	0.227055	0.559712	0.107788	-0.385594	0.941503	1.02924	0.223663	4.59653	2	Mother
478	2.68857	1	6	-0.34	-0.57	0.746153	CM	1	10	0	Primary 6 or lower	0	2		0	1	2	1	0	0	2	0	0	-0.407949	-0.35571	-0.895631	0.525933	-0.369561	1.38294	1.52933	0.25078	2.88715	1	Mother
478	2.68857	1	12	-0.34	-0.57	0.746153	CM	1	10	0	Primary 6 or lower	0	2		0	1	2	1	0	0	2	0	0	-0.103626	-0.283028	-0.0285316	-0.34947	0.29703	0.493567	0.489167	0.273424	0.562049	1	Mother
478	2.68857	1	24	-0.34	-0.57	0.746153	CM	1	10	0	Primary 6 or lower	0	2		0	1	2	1	0	0	2	0	0	-0.973172	-1.46335	-0.617297	-0.374718	-0.326831	0.404469	0.364974	0.323049	0.730737	1	Other	0.601711	-0.195408	1.19001	0.865186	1.18246	0.794259	0.826547	0.0798982	-0.294293	1	Other
479	8.14237	2	0	-0.69	-1.48	0.40036		3	10	1	Primary 6 or lower		2	1																																-0.27987	-0.296221	0.427967	-0.671634
479	8.14237	2	6	-0.69	-1.48	0.40036		3	10	1	Primary 6 or lower		2	1																																0.0475756	0.32438	0.448644	-0.645914
479	8.14237	2	12	-0.69	-1.48	0.40036		3	10	1	Primary 6 or lower		2	1																																-0.41674	-0.308233	-1.22956	0.491811
479	8.14237	2	24	-0.69	-1.48	0.40036		3	10	1	Primary 6 or lower		2	1																																0.0797638	0.619673	-0.33937	-0.198992
480	3.96167	2	0	-0.86	1.38	1.19282	CM	1	15	1	Primary 7	1	2		0	1	0	1	0	0	2	1	1	-0.060676	-0.186152	-0.117514	0.645556	-0.368504	-0.414831	-0.304071	-0.577077	-0.828991		Mother
480	3.96167	2	6	-0.86	1.38	1.19282	CM	1	15	1	Primary 7	1	2		0	1	0	1	0	0	2	1	1
480	3.96167	2	12	-0.86	1.38	1.19282	CM	1	15	1	Primary 7	1	2		0	1	0	1	0	0	2	1	1
480	3.96167	2	24	-0.86	1.38	1.19282	CM	1	15	1	Primary 7	1	2		0	1	0	1	0	0	2	1	1
481	5.08693	2	0	-2.62	-1.97	-0.02089	SMA	2	8	1	Secondary or higher	0	3		1	1	0	0	0	0	0	1	1	-0.791008	-1.01199	-0.68278	0.185262	-0.662156	-1.32369	-1.38078	-0.52135	-0.639562	1	Mother	0.0597699	0.0975281	0.348603	-0.33889	0.641693	-0.662451	-0.0416626	-0.484393	0.390598		Mother
481	5.08693	2	6	-2.62	-1.97	-0.02089	SMA	2	8	1	Secondary or higher	0	3		1	1	0	0	0	0	0	1	1	0.0146765	0.406837	-0.58774	1.03659	-0.647565	-1.60814	-1.44329	-1.39552	-0.555679	7	Mother	-0.35384	-0.768445	0.239539	-0.0351638	0.140617	-0.496573	0.316699	-0.638453	-0.734498	1	Mother
481	5.08693	2	12	-2.62	-1.97	-0.02089	SMA	2	8	1	Secondary or higher	0	3		1	1	0	0	0	0	0	1	1																					1	Mother	-0.956392	-0.89856	-0.503468	-0.774108
481	5.08693	2	24	-2.62	-1.97	-0.02089	SMA	2	8	1	Secondary or higher	0	3		1	1	0	0	0	0	0	1	1
482	3.81656	2	0	-3.02	-0.46	0.846043	CM	1	8		Secondary or higher	0	2		1	1	1	1	0	0	2	1	1	-0.698897	-1.21393	-0.925082	1.08115	-0.699354	-0.316861	-0.187509	-0.584263	0.34762	1
482	3.81656	2	6	-3.02	-0.46	0.846043	CM	1	8		Secondary or higher	0	2		1	1	1	1	0	0	2	1	1	-1.01228	-1.13777	-0.833697	-0.658684	-0.358723	0.713051	0.995946	-0.560535	-0.772761	1	Mother
482	3.81656	2	12	-3.02	-0.46	0.846043	CM	1	8		Secondary or higher	0	2		1	1	1	1	0	0	2	1	1	-0.586233	0.271484	-0.750145	-1.5336	-0.0192949	0.659051	0.924213	-0.538841	-0.699018	1	Other	-0.520147	-0.97036	0.0082588	0.298024	-0.737514	-0.234938	0.691665	-0.599807	-1.01399	1	Other
482	3.81656	2	24	-3.02	-0.46	0.846043	CM	1	8		Secondary or higher	0	2		1	1	1	1	0	0	2	1	1	-0.586887	-0.573503	-0.558496	-0.695038	0.0101269	0.211115	0.245372	-0.0396573	0.671169	1	Mother	0.811358	-0.360168	1.62545	0.90839	2.31769	1.18973	0.572126	0.045433	-0.52309	1	Mother
483	9.74675	2	0	-2.72	-1.79	1.16251		3	11	1	Primary 6 or lower		2	0																																-0.562609	-0.315194	-0.356983	-0.591888
483	9.74675	2	6	-2.72	-1.79	1.16251		3	11	1	Primary 6 or lower		2	0																																-0.235222	-0.948002	0.512642	0.175668
483	9.74675	2	12	-2.72	-1.79	1.16251		3	11	1	Primary 6 or lower		2	0																																0.0918201	-0.327174	0.532552	0.200435
483	9.74675	2	24	-2.72	-1.79	1.16251		3	11	1	Primary 6 or lower		2	0																																-1.1533	-0.965712	-1.12563	-0.491864
484	2.18207	1	0	-0.72	-0.88	-1.10672		3	14	0	Secondary or higher		3	0										-0.785587	-1.19308	0.463105	-0.311391	-1.05363	1.22473	1.64557	-0.700266	-0.893404	1	Mother	-0.10227	-0.317964	0.140704	-0.153108	0.266927	0.230118	-0.342761	-0.424526	-0.152785		Mother
484	2.18207	1	6	-0.72	-0.88	-1.10672		3	14	0	Secondary or higher		3	0										-0.848458	-0.444059	-1.00164	0.107995	-1.03904	-0.736227	-1.19229	1.1221	-0.80952	1	Mother	-1.34493	-0.716124	-1.55703	-1.8818	-0.874421	-1.23926	-2.08118	0.37209	-1.1168	1	Mother
484	2.18207	1	12	-0.72	-0.88	-1.10672		3	14	0	Secondary or higher		3	0										-1.1642	-1.04075	-0.913908	-0.335535	-1.02557	-0.906689	-0.844367	-0.65281	-0.73209	1	Mother	-1.05498	-1.01169	-0.454453	-1.7187	0.534614	-1.63123	-1.52458	-0.745172	-0.965822	1	Mother
484	2.18207	1	24	-0.72	-0.88	-1.10672		3	14	0	Secondary or higher		3	0										0.696341	-0.211217	0.837524	0.50303	0.963461	1.99837	1.94597	1.19464	0.638097	7	Mother	-0.552523	0.0663188	-0.670349	-1.61643	0.388455	-1.29674	-1.64412	-0.416824	0.330483	5	Mother
485	5.86721	2	0	-1.31	-1.98	-0.514224		3	12	1	Secondary or higher		2	1										0.297475	0.451664	-0.533953	0.597543	0.340496	-0.72757	-0.428771	-1.38155	-0.508207	1	Mother
485	5.86721	2	6	-1.31	-1.98	-0.514224		3	12	1	Secondary or higher		2	1																																-0.631485	-0.903255	0.361453	-0.754375
485	5.86721	2	12	-1.31	-1.98	-0.514224		3	12	1	Secondary or higher		2	1																																-0.939144	-0.281521	-1.31982	-0.733418
485	5.86721	2	24	-1.31	-1.98	-0.514224		3	12	1	Secondary or higher		2	1																																1.77345	3.46646	0.419981	-0.310583
486	1.88638	1	0	0.99	-0.82	1.54024	SMA	2	9	0	Secondary or higher	0	3		0	1	0	0		0	1	1	1	-0.325591	-0.235368	0.0167609	-0.303941	-0.409084	-0.735648	-0.897486	0.183935	0.257857	1	Mother
486	1.88638	1	6	0.99	-0.82	1.54024	SMA	2	9	0	Secondary or higher	0	3		0	1	0	0		0	1	1	1	0.107856	0.178746	0.111802	-0.316496	0.25871	-0.541108	-0.404933	-0.690232	-0.859297	1	Mother	-0.962832	-1.06076	-0.78191	-0.716395	-0.743597	-0.247524	-0.911342	0.275464	-1.53602	1	Mother
486	1.88638	1	12	0.99	-0.82	1.54024	SMA	2	9	0	Secondary or higher	0	3		0	1	0	0		0	1	1	1	0.164356	-0.0830417	0.589478	-0.328085	0.272178	0.366177	0.359287	0.231391	-0.781867	1	Mother	-0.672886	0.164066	-1.1458	-0.680313	-1.89565	-0.912035	-0.354739	-0.208014	0.386857	2	Mother
486	1.88638	1	24	0.99	-0.82	1.54024	SMA	2	9	0	Secondary or higher	0	3		0	1	0	0		0	1	1	1	2.3978	2.08698	3.90174	-1.21742	1.93477	-0.0809368	-0.041182	-0.167999	-0.611796	7	Mother	0.660755	0.659355	0.350673	1.07523	-0.546313	1.05954	0.995103	0.122123	0.87955	1	Mother
487	4.22998	1	0	-0.25	-1.55	1.01943	CM	1	14	1	Secondary or higher	0	3		0	1	1	1	0	0	2	1	1	0.334529	0.137179	1.6336	0.0689505	-0.667061	0.334611	0.432517	-0.149423	1.85342	2	Mother	-0.574688	0.0981032	-0.647296	-1.96742	0.839012	-1.54103	-2.03815	0.244695	0.036178		Mother
487	4.22998	1	6	-0.25	-1.55	1.01943	CM	1	14	1	Secondary or higher	0	3		0	1	1	1	0	0	2	1	1	-0.978889	-0.800945	-0.626175	-0.373545	-0.981397	-0.800014	-0.752284	-0.5781	-0.478136	1	Mother	-1.07454	-0.68065	-0.900132	-1.69185	-0.111091	-1.67413	-1.4938	-0.885988	-0.470652	1	Mother
487	4.22998	1	12	-0.25	-1.55	1.01943	CM	1	14	1	Secondary or higher	0	3		0	1	1	1	0	0	2	1	1	-1.17021	-0.727393	-0.537923	-1.24909	-0.967848	-1.20957	-1.09778	-1.00461	-0.400244	1	Mother	-0.672983	-0.390421	-1.14107	-0.511556	-1.04896	0.115165	-0.93638	-0.101003	-0.479858	1	Mother
487	4.22998	1	24	-0.25	-1.55	1.01943	CM	1	14	1	Secondary or higher	0	3		0	1	1	1	0	0	2	1	1																							-0.900672	-0.768059	-0.502267	-0.794202
488	6.03696	2	0	-0.94	0.14	0.0954987	CM	1	14	1	Secondary or higher	0	3		0	1	0	1	1	0	2	1	1																							-0.00768659	-0.271322	1.1929	-0.776285
488	6.03696	2	6	-0.94	0.14	0.0954987	CM	1	14	1	Secondary or higher	0	3		0	1	0	1	1	0	2	1	1																							0.635956	0.349473	0.36386	0.732561
488	6.03696	2	12	-0.94	0.14	0.0954987	CM	1	14	1	Secondary or higher	0	3		0	1	0	1	1	0	2	1	1																							-0.142942	-0.910961	1.23655	-0.351001
488	6.03696	2	24	-0.94	0.14	0.0954987	CM	1	14	1	Secondary or higher	0	3		0	1	0	1	1	0	2	1	1																							2.41063	1.89737	3.39945	0.44105
489	3.02533	1	0	2.28	-1.59	-1.06121	CM	1	7	0	Primary 6 or lower	0	3		0	1	0	1	0	0	2	1	1	0.806949	0.280587	1.40383	0.531244	0.277469	-0.804199	-1.00073	0.24034	0.44959	1	Mother	-1.32091	-1.05475	-1.70774	-1.25137	-1.2049	-0.0342514	-1.97825	-0.782749	-1.00357		Mother
489	3.02533	1	6	2.28	-1.59	-1.06121	CM	1	7	0	Primary 6 or lower	0	3		0	1	0	1	0	0	2	1	1	-0.3723	-0.979385	-0.840278	1.3825	-0.361063	-0.728998	-0.646526	-0.633692	-0.667103	1	Mother	-0.738598	0.0685067	-1.44945	-1.32775	-0.851515	-0.412548	-1.82875	0.331654	-0.0336995	1	Mother
489	3.02533	1	12	2.28	-1.59	-1.06121	CM	1	7	0	Primary 6 or lower	0	3		0	1	0	1	0	0	2	1	1	-0.55925	-0.230367	-0.745237	-0.789758	-0.0198708	-0.654208	-0.570274	-0.609015	-0.58322	1	Mother	-1.20748	-0.680513	-1.68072	-1.27807	-1.35259	-0.519212	-1.68006	0.177594	-0.997713	1	Mother
489	3.02533	1	24	2.28	-1.59	-1.06121	CM	1	7	0	Primary 6 or lower	0	3		0	1	0	1	0	0	2	1	1	2.05081	1.61041	2.18387	2.20748	0.337355	-0.137982	0.00607169	-0.55722	0.79388	7	Mother	-0.357383	-0.405801	-1.39664	0.490091	-1.48728	2.28184	-0.948635	0.202469	-0.65442	1	Mother
490	3.12115	2	0	-0.42	-0.85	1.01943	CM	1	12	0	Primary 6 or lower	0	3		0	1	0	1	1	0	2	1	1	-1.90103	-1.99428	-0.667776	-1.49297	-1.37292	-1.25949	-1.40406	-0.16928	-0.970486	1	Other	-2.36507	-1.92512	-2.38505	-2.17922	-2.04169	-1.5894	-2.30565	-1.76056	-1.70439		Other
490	3.12115	2	6	-0.42	-0.85	1.01943	CM	1	12	0	Primary 6 or lower	0	3		0	1	0	1	1	0	2	1	1	-0.231839	-0.581986	1.75911	-0.64061	-1.03293	-1.31061	-1.19533	-1.04548	-0.292997	7	Other	-1.13661	-0.116554	-1.77204	-1.636	-1.48712	-1.16464	-1.74987	-0.0266853	-0.104572	1	Other
490	3.12115	2	12	-0.42	-0.85	1.01943	CM	1	12	0	Primary 6 or lower	0	3		0	1	0	1	1	0	2	1	1	-1.89395	-1.82455	-0.854063	-1.51988	-1.34165	-1.93747	-2.07327	-0.565823	-0.790736	1	Other	-0.953738	-0.238771	-1.48399	-1.29247	-1.10314	-0.688854	-1.56769	0.48972	-0.548495	1	Mother
490	3.12115	2	24	-0.42	-0.85	1.01943	CM	1	12	0	Primary 6 or lower	0	3		0	1	0	1	1	0	2	1	1	0.729558	1.37325	0.536144	0.610719	-0.328019	-0.207309	-0.370027	0.39024	1.80584	5	Mother	-0.447816	-0.741718	0.0518907	-0.755733	0.92701	-0.576778	-0.803583	-1.03408	-0.491418	5	Mother
491	2.63381	1	0	-0.95	-1.87	-0.577331	CM	1	9	0	Primary 6 or lower	0	3		1	1	0	1	1	0	2	1	1	-0.606016	-0.451458	-0.62057	-0.322773	-0.387198	0.813535	0.882095	0.220951	0.383682	1	Mother	0.184473	0.319024	0.752231	-0.373992	0.606546	-1.25476	0.421069	0.990664	-0.00450413		Mother
491	2.63381	1	6	-0.95	-1.87	-0.577331	CM	1	9	0	Primary 6 or lower	0	3		1	1	0	1	1	0	2	1	1	-0.181314	0.956053	-0.929052	-0.333535	-0.374691	0.278891	0.253619	0.242103	0.455582	7	Mother	-0.97541	-0.456654	-1.08705	-0.857666	-1.62181	-1.11258	-0.499879	-0.137334	-0.508638	1	Mother
491	2.63381	1	12	-0.95	-1.87	-0.577331	CM	1	9	0	Primary 6 or lower	0	3		1	1	0	1	1	0	2	1	1	-0.745547	-0.310882	-0.841844	0.0868862	-1.01451	-0.849981	-0.78655	-0.634099	-0.668486	1	Mother	-1.34977	-1.1041	-0.840649	-1.71174	-0.426962	-2.05054	-1.20216	-0.621707	-1.16397	1	Mother
491	2.63381	1	24	-0.95	-1.87	-0.577331	CM	1	9	0	Primary 6 or lower	0	3		1	1	0	1	1	0	2	1	1	0.249798	-0.146805	0.134918	0.492821	0.322123	1.22094	1.31414	0.315863	1.90735	7	Mother	-0.339204	0.45197	-0.438081	-1.21869	-0.138624	-1.70694	-0.684497	1.61694	-0.180841	5	Mother
492	2.99795	1	0	-3.28	-2.2	-0.194277	CM	1	7	1	Primary 6 or lower	1	3		1	1	1	1	0	0	2	1	1	-0.189049	-0.393574	-0.941063	0.531934	0.276668	1.10769	0.937817	1.13783	0.444981	1	Mother	3.20053	2.6775	3.41746	2.04161	3.90963	2.13698	1.78779	2.37722	2.53125		Mother
492	2.99795	1	6	-3.28	-2.2	-0.194277	CM	1	7	1	Primary 6 or lower	1	3		1	1	1	1	0	0	2	1	1	1.10354	0.343258	1.47903	-0.342572	1.59542	0.931473	1.00234	0.259865	0.515959	7	Mother	1.04366	0.964145	1.57669	-0.0953492	2.32002	-0.448093	0.236175	2.51501	0.0923336	1	Mother
492	2.99795	1	12	-3.28	-2.2	-0.194277	CM	1	7	1	Primary 6 or lower	1	3		1	1	1	1	0	0	2	1	1	0.0433224	-0.923241	-0.772914	0.941663	0.955685	0.0425114	0.240122	-0.616201	-0.607648	1	Mother	1.8863	1.83811	1.70163	1.59207	1.16796	1.34029	1.63149	1.39774	1.85413	1	Mother
492	2.99795	1	24	-3.28	-2.2	-0.194277	CM	1	7	1	Primary 6 or lower	1	3		1	1	1	1	0	0	2	1	1	1.28279	1.24504	1.75737	0.484543	0.331743	1.39	1.50318	0.332134	-0.439421	7	Mother	0.949609	1.97844	0.262187	-1.35624	2.30082	-0.507392	-1.84453	1.7243	1.85998	5	Mother
493	1.87817	1	0	-2.06	-3.3	-1.37142	SMA	2	8	0	Primary 6 or lower	0	3		0	1	0	0	1	1	1	1	1	-0.698838	-1.24139	0.0151943	-1.16762	0.243879	-0.018382	-0.0661414	0.183528	-0.944563	1	Mother
493	1.87817	1	6	-2.06	-3.3	-1.37142	SMA	2	8	0	Primary 6 or lower	0	3		0	1	0	0	1	1	1	1	1	-1.00953	-0.491933	-1.05908	-1.18024	-0.394653	-0.901179	-0.544538	-1.58935	-0.860219	1	Mother	0.0851581	-0.127189	0.0720417	1.06003	-1.3854	0.840827	1.18381	-0.36011	0.0730009	1	Mother
493	1.87817	1	12	-2.06	-3.3	-1.37142	SMA	2	8	0	Primary 6 or lower	0	3		0	1	0	0	1	1	1	1	1	0.0355681	0.915577	-0.977617	-0.327119	0.271056	-0.597574	-0.47918	-0.669352	-0.788319	7	Mother	-0.964185	-0.66896	-0.789592	-1.07498	-0.839239	-1.19734	-0.785533	-0.854323	-0.431133	1	Mother
493	1.87817	1	24	-2.06	-3.3	-1.37142	SMA	2	8	0	Primary 6 or lower	0	3		0	1	0	0	1	1	1	1	1	1.40012	1.07574	3.11401	-1.21639	0.953761	0.272149	0.230067	0.27939	-0.618709	7	Mother	0.534197	0.527023	0.0951063	0.552563	0.0824871	1.31841	-0.065542	1.69316	-0.10042	1	Mother
494	3.00068	2	0	-1.4	-0.68	1.19282		3	7	0	Primary 7		2	1										0.193517	1.0007	-0.300807	-0.626055	0.25656	-0.199819	0.242707	-1.52351	-0.990765	1	Other
494	3.00068	2	6	-1.4	-0.68	1.19282		3	7	0	Primary 7		2	1										-0.98405	-0.591996	-0.982525	-0.639023	-0.708173	0.116936	0.182706	-0.149756	-0.904117	1	Mother
494	3.00068	2	12	-1.4	-0.68	1.19282		3	7	0	Primary 7		2	1										-0.430896	-0.518445	-0.894272	0.213201	-0.0414213	0.306134	0.253511	0.322581	-0.826225	1	Other	0.345779	1.08572	-0.0747879	-0.0969648	-0.521756	-0.48649	0.25651	2.00529	0.50988	1	Other
494	3.00068	2	24	-1.4	-0.68	1.19282		3	7	0	Primary 7		2	1										-0.555293	-1.02809	-0.702102	0.187815	-0.0119194	-0.0216418	0.130156	-0.526366	-0.656615	1	Other	0.572956	0.995217	0.565499	-0.12076	0.613394	-0.696174	0.347467	2.33453	0.196265	1	Other
495	3.35113	1	0	-3.11	-2.51	-0.887823	CM	1	13	0	Primary 6 or lower	0	3		1	0	0	1	0	0	2	0	1	4.81751	3.01161	2.24587	3.97856	4.85943	1.1607	1.2694	0.256475	5	7	Other	3.78045	4.2132	3.02457	1.9128	3.58144	2.25455	1.47382	3.76021	3.93583		Other
495	3.35113	1	6	-3.11	-2.51	-0.887823	CM	1	13	0	Primary 6 or lower	0	3		1	0	0	1	0	0	2	0	1	-0.834314	-0.934992	-0.787013	-0.352298	-0.352886	0.749915	0.783878	0.278983	-0.620092	1	Mother	0.696803	1.22567	0.459492	0.295598	-0.133231	-0.319583	0.77072	0.739803	1.34662	1	Mother
495	3.35113	1	12	-3.11	-2.51	-0.887823	CM	1	13	0	Primary 6 or lower	0	3		1	0	0	1	0	0	2	0	1	-0.405575	0.477741	-0.699283	-0.795829	-0.339417	0.938702	1.27057	-0.597083	0.658376	7	Mother	1.31837	1.28096	1.68428	0.966811	1.06238	-0.166464	1.74668	1.207	1.17543	1	Mother
495	3.35113	1	24	-3.11	-2.51	-0.887823	CM	1	13	0	Primary 6 or lower	0	3		1	0	0	1	0	0	2	0	1	1.82653	0.636595	2.61089	0.474816	1.64945	1.56769	1.70102	0.351252	0.826603	7	Mother	2.48193	3.52645	1.22248	0.813076	1.76839	1.25638	0.367437	3.11802	3.27535	5	Mother
496	2.81999	1	0	-0.7	-0.11	0.746153	SMA	2	7	0	Secondary or higher	1	2		0	1	0	0	0	0	0	1	1	1.40212	0.582849	2.14456	0.536418	0.92466	0.362479	0.910584	-1.56752	1.01554	1	Mother
496	2.81999	1	6	-0.7	-0.11	0.746153	SMA	2	7	0	Secondary or higher	1	2		0	1	0	0	0	0	0	1	1	-0.0246123	-0.341347	-0.878399	0.091715	0.939491	1.03725	1.68193	-1.54243	2.90236	1	Mother
496	2.81999	1	12	-0.7	-0.11	0.746153	SMA	2	7	0	Secondary or higher	1	2		0	1	0	0	0	0	0	1	1	-0.220979	-0.944132	-0.797979	0.944974	0.298634	0.861035	1.19138	-0.622709	-0.629771	1	Mother	0.729647	0.151556	1.17711	1.29142	0.277556	0.75145	1.59228	-0.229661	0.361257	1	Mother
496	2.81999	1	24	-0.7	-0.11	0.746153	SMA	2	7	0	Secondary or higher	1	2		0	1	0	0	0	0	0	1	1	-0.0975534	-0.114599	-0.606331	0.0557747	0.328055	-0.18565	-0.0425283	-0.572948	0.139897	1	Mother	1.39791	0.761748	1.57224	1.39368	1.62537	1.63103	1.05338	0.415578	0.852152	1	Mother
497	4.43532	2	0	-0.03	-0.39	1.19282		3	11	1	Secondary or higher		2	0										-1.11921	-1.11557	-0.807065	-0.662202	-0.681236	-1.18199	-1.20296	-0.55362	-0.749255	1	Mother
497	4.43532	2	6	-0.03	-0.39	1.19282		3	11	1	Secondary or higher		2	0										-0.929549	-0.360895	-0.705235	-1.10759	-0.665603	-1.58085	-1.39879	-1.42602	-0.659381	1	Mother
497	4.43532	2	12	-0.03	-0.39	1.19282		3	11	1	Secondary or higher		2	0										0.735611	0.711276	0.155598	0.609477	0.653229	0.0395875	-0.0849515	0.392681	-0.587942	2	Mother	-1.09183	-1.07412	-1.27899	-0.738257	-0.980041	-0.0152852	-1.20823	-1.01797	-0.958487	1	Mother
497	4.43532	2	24	-0.03	-0.39	1.19282		3	11	1	Secondary or higher		2	0																																0.161603	0.975935	-0.0597939	-0.750292
499	5.42642	2	0	-0.89	-1.03	2.57991		3	10	1	Secondary or higher		2	0										1.36004	1.0514	2.50154	0.60865	0.000987754	1.72102	1.44651	1.74257	-0.582411	2
499	5.42642	2	6	-0.89	-1.03	2.57991		3	10	1	Secondary or higher		2	0										0.307901	-0.87446	-0.517765	1.89123	0.669583	-0.475331	-0.138249	-1.37735	-0.493919	1	Mother
499	5.42642	2	12	-0.89	-1.03	2.57991		3	10	1	Secondary or higher		2	0																																-0.632004	-0.276243	-0.488589	-0.7556
499	5.42642	2	24	-0.89	-1.03	2.57991		3	10	1	Secondary or higher		2	0																																-0.451755	-0.288579	-0.446908	-0.332765
500	4.59411	1	0	-2.06	-1.86	1.53959		3	16	1	Secondary or higher		3	0										-0.489298	-0.809649	-0.636619	0.491717	-0.329797	1.22751	1.04331	1.21688	0.713684	1	Mother
500	4.59411	1	6	-2.06	-1.86	1.53959		3	16	1	Secondary or higher		3	0										-0.425735	0.612223	-0.537923	-0.385203	-0.967848	0.826181	0.844958	0.343659	-0.400244	1	Mother	1.04038	0.194345	1.79187	1.26681	1.51213	0.660252	1.57976	-0.101003	0.325551	1	Mother
500	4.59411	1	12	-2.06	-1.86	1.53959		3	16	1	Secondary or higher		3	0										-1.11203	-0.6521	-0.447582	-1.26102	-0.953979	0.298524	0.223604	0.367116	-0.320509	1	Mother	-0.0460781	0.371722	-0.156975	-0.343594	-0.276371	-0.817332	0.0436627	0.687561	0.158859	1	Mother
500	4.59411	1	24	-2.06	-1.86	1.53959		3	16	1	Secondary or higher		3	0																																0.691791	1.73335	-0.483779	-0.0292318
501	2.58179	1	0	-0.98	-1.17	-0.0479372	CM	1	9	0	Secondary or higher	1	2		0	1	1	1	1	0	2	1	1	1.12471	0.879889	1.70918	0.54242	0.264482	-0.152271	-0.236001	0.218375	0.374925	1	Other
501	2.58179	1	6	-0.98	-1.17	-0.0479372	CM	1	9	0	Secondary or higher	1	2		0	1	1	1	1	0	2	1	1	-0.176942	-0.377906	0.63752	-0.334431	-0.373649	-0.554015	-0.434769	-0.654979	-0.739464	1	Other	-0.132481	0.14144	0.144677	-0.845045	0.522377	-1.10073	-0.489259	-0.125703	0.308454	1	Other
501	2.58179	1	12	-0.98	-1.17	-0.0479372	CM	1	9	0	Secondary or higher	1	2		0	1	1	1	1	0	2	1	1	-0.983953	-0.968069	-0.826701	-0.778997	-0.358979	-0.239314	-0.0805649	-0.630167	-0.65512	1	Other	-1.42934	-1.07437	-1.06349	-1.55656	-1.04505	-2.02411	-0.968793	-1.22954	-0.815743	1	Other
501	2.58179	1	24	-0.98	-1.17	-0.0479372	CM	1	9	0	Secondary or higher	1	2		0	1	1	1	1	0	2	1	1	-0.488289	0.196369	0.14484	-1.23625	-0.656158	0.629997	0.0731956	2.11613	-0.485971	7	Other	0.399594	1.05622	0.0648714	-0.565113	0.51618	-0.599446	-0.459297	1.95083	0.480561	1	Other
502	3.42505	1	0	-2.4	-2.91	1.53959	CM	1	6	0	Primary 7	0	2		0	0	0	1	0	0	2	0	0	-1.12922	-0.995488	-0.859599	-0.34271	-1.01723	-1.4627	-1.49463	-0.638709	-0.684157	1	Other
502	3.42505	1	6	-2.4	-2.91	1.53959	CM	1	6	0	Primary 7	0	2		0	0	0	1	0	0	2	0	0	-0.820189	-0.916713	-0.765081	-0.355196	-0.349519	-0.909323	-0.863728	-0.614167	0.600303	1	Other	-0.86117	-0.719474	-0.73133	-0.679837	-0.954806	-0.82639	-0.453038	-1.12397	-0.387536	1	Other
502	3.42505	1	12	-2.4	-2.91	1.53959	CM	1	6	0	Primary 7	0	2		0	0	0	1	0	0	2	0	0	-0.645326	-0.850995	-0.686228	0.0663291	-0.337413	-1.20652	-1.078	-1.04312	-0.531139	1	Other	-0.976266	-1.14942	-0.619036	-0.533234	-0.839318	-0.688766	-0.329679	-1.62266	-0.735081	1	Other
502	3.42505	1	24	-2.4	-2.91	1.53959	CM	1	6	0	Primary 7	0	2		0	0	0	1	0	0	2	0	0	0.471407	-0.355495	0.676302	0.472815	0.671973	-1.29439	-1.3397	-0.543661	0.239451	7	Other	-1.02437	-0.771083	-0.955652	-0.937137	-0.983947	-1.17008	-0.657263	-0.975631	-0.564552	5	Other
503	2.85832	2	0	-1.56	-1.26	-0.312634		3	8	0	Secondary or higher		2	1										-1.06476	-0.696449	-1.10785	-0.622467	-0.727413	0.0183117	-0.0566128	0.267125	0.186306	1	Mother
503	2.85832	2	6	-1.56	-1.26	-0.312634		3	8	0	Secondary or higher		2	1										-0.75338	-0.614628	-1.00968	1.09233	-1.36554	0.0955672	-0.116614	0.742038	0.272954	1	Mother
503	2.85832	2	12	-1.56	-1.26	-0.312634		3	8	0	Secondary or higher		2	1										-0.942348	-1.20784	-0.917771	0.648246	-1.02483	-0.311107	-0.181643	-0.582365	-0.846966	1	Mother	-0.586594	-0.363858	-0.230459	-1.15687	0.297524	-1.34513	-0.828643	-0.886999	-0.0138061	1	Mother
503	2.85832	2	24	-1.56	-1.26	-0.312634		3	8	0	Secondary or higher		2	1										-1.19082	-1.04768	-0.725601	-0.241022	-1.32193	-0.279633	-0.166231	-0.532468	-0.677356	1	Mother	-0.469956	-0.454359	-0.445612	-0.672555	0.152129	-0.192101	-0.947365	-0.240865	-0.488502	1	Mother
504	4.03559	2	0	-1.39	-2.33	-1.06121	CM	1	6	0	Secondary or higher	0	3		0	1	0	1	0	0	2	1	1	-0.175675	0.160503	-0.883306	1.07563	-0.692941	0.195013	-0.153992	1.22427	-0.816546	1	Mother	1.80522	1.69201	2.01833	0.812608	2.48224	0.622823	0.9027	1.39029	1.65632		Mother
504	4.03559	2	6	-1.39	-2.33	-1.06121	CM	1	6	0	Secondary or higher	0	3		0	1	0	1	0	0	2	1	1	1.86845	2.581	0.377917	0.19968	1.9339	2.42242	2.41713	1.248	3.46774	1	Mother	1.77102	2.2223	1.29303	1.23656	0.695269	0.782322	1.46502	1.86376	2.13576	1	Mother
504	4.03559	2	12	-1.39	-2.33	-1.06121	CM	1	6	0	Secondary or higher	0	3		0	1	0	1	0	0	2	1	1	-1.3028	-1.03201	-0.706802	-1.53933	-0.665844	-0.624089	-0.567449	-0.527587	1.14079	1	Mother	2.00036	1.92161	1.53645	1.64887	1.46021	2.02106	1.17883	2.00959	1.63791	1	Mother
504	4.03559	2	24	-1.39	-2.33	-1.06121	CM	1	6	0	Secondary or higher	0	3		0	1	0	1	0	0	2	1	1	2.29754	3.15005	1.8287	1.02645	0.670625	2.16451	2.08747	1.32095	3.11519	7	Mother	2.95352	3.35868	2.67077	1.37782	3.02756	0.72758	1.69486	2.66199	3.26357	1	Mother
506	2.7707	2	0	0.2	-0.84	-1.10672	CM	1	9	0	Secondary or higher	1	2		1	1	3	1	0	0	2	1	1	-1.07553	-0.710376	-0.344672	-0.62026	-1.38318	-0.234338	-0.625087	1.16163	0.171557	1	Mother
506	2.7707	2	6	0.2	-0.84	-1.10672	CM	1	9	0	Secondary or higher	1	2		1	1	3	1	0	0	2	1	1	1.21608	1.03944	0.915507	-0.632194	1.8967	0.435503	0.279995	0.735666	0.251292	2	Mother	-1.70905	-1.17727	-1.61835	-2.0085	-1.15358	-1.82092	-1.84953	-1.4034	-0.858538	1	Mother
506	2.7707	2	12	0.2	-0.84	-1.10672	CM	1	9	0	Secondary or higher	1	2		1	1	3	1	0	0	2	1	1	-1.45212	-1.22525	-0.93866	-0.644818	-1.35464	-1.76454	-1.86361	-0.587788	-0.865401	1	Mother	-1.95578	-1.45745	-1.97108	-2.08488	-1.44046	-1.65413	-2.11939	-1.23968	-1.33841	1	Mother
506	2.7707	2	24	0.2	-0.84	-1.10672	CM	1	9	0	Secondary or higher	1	2		1	1	3	1	0	0	2	1	1	-1.32903	-1.40086	-0.747534	-0.238125	-1.3253	-1.49439	-1.5715	-0.538163	-0.696713	7	Mother	-0.625348	-0.497422	-0.721257	-0.967385	0.120007	-0.230381	-1.40103	-0.278441	-0.526247	1	Mother
507	3.98631	2	0	0.12	-1.66	0.672657	CM	1	14	1	Primary 6 or lower	0	3		0	0	2	1	0	0	2	0	0	-0.429887	-0.517139	-0.892706	-0.650889	0.612022	-1.00988	-0.994135	-0.575857	-0.824843	1	Mother	-1.30911	-1.71808	-1.0502	-0.602157	-0.94631	0.0613307	-0.999107	-1.47784	-1.58149		Mother
507	3.98631	2	6	0.12	-1.66	0.672657	CM	1	14	1	Primary 6 or lower	0	3		0	0	2	1	0	0	2	0	0	0.489787	0.218822	-0.0334392	1.49833	-0.0289952	-0.46842	-0.514151	-0.105825	-0.754786	1	Mother	-0.373014	-0.392704	0.162686	-0.58161	0.237063	-1.16285	-0.03622	-1.34185	0.165929	2	Mother
507	3.98631	2	12	0.12	-1.66	0.672657	CM	1	14	1	Primary 6 or lower	0	3		0	0	2	1	0	0	2	0	0	0.175058	0.628149	-0.724034	-0.241229	0.637917	-0.87715	-0.581275	-1.43091	-0.675973	1	Mother	0.583374	0.0165291	1.02309	0.727647	1.00812	0.628263	0.732511	-0.238181	0.158521	1	Mother
507	3.98631	2	24	0.12	-1.66	0.672657	CM	1	14	1	Primary 6 or lower	0	3		0	0	2	1	0	0	2	0	0	4.26936	2.46283	3.75754	2.75697	3.60683	-0.00742681	-0.0107946	-0.0327422	3.09675	7	Mother	2.57918	2.499	1.90779	2.60925	1.07615	2.59893	2.29121	1.35863	2.74438	5	Mother
508	2.26146	1	0	-1.48	-0.76	1.54024		3	7	0	Primary 7		3	0										-0.651754	-0.510647	-0.691589	-0.313392	-0.398101	0.158899	0.131281	0.202511	-0.880038	1	Mother
508	2.26146	1	6	-1.48	-0.76	1.54024		3	7	0	Primary 7		3	0										-0.714625	-0.431438	-0.986494	0.537936	-1.03671	0.113939	0.346299	-0.671657	-0.796154	1	Mother	-1.31396	-1.1542	-1.04665	-1.34554	-0.852241	-1.21283	-1.21878	-0.869533	-1.09074	1	Mother
508	2.26146	1	12	-1.48	-0.76	1.54024		3	7	0	Primary 7		3	0										-1.14906	-1.02117	-0.890409	-0.33864	-1.02196	-0.0499489	0.145855	-0.646708	-0.71135	1	Mother	-1.28327	-0.848594	-1.15422	-1.67501	-0.711514	-1.59022	-1.48782	-0.704911	-0.7643	2	Mother
508	2.26146	1	24	-1.48	-0.76	1.54024		3	7	0	Primary 7		3	0										-0.77445	-1.52733	-0.694061	1.36319	-0.991819	0.104563	0.303386	-0.595727	-0.538052	7	Mother	-0.771205	-0.46308	-0.630192	-1.30996	0.00290651	-1.24752	-1.18065	-1.0023	-0.104234	1	Mother
509	3.72348	1	0	0.58	-0.26	0.846043	SMA	2	20	1	Primary 6 or lower	0	2		0	1	0	0	0	0	0	1	1	-0.720324	-0.948049	-0.802679	0.0817124	-0.355291	0.977087	1.04884	0.274915	0.567119	1	Mother
509	3.72348	1	6	0.58	-0.26	0.846043	SMA	2	20	1	Primary 6 or lower	0	2		0	1	0	0	0	0	0	1	1	-0.286204	-0.867969	-0.706594	0.500961	0.312663	0.932949	1.2647	-0.598981	1.25244	1	Mother
509	3.72348	1	12	0.58	-0.26	0.846043	SMA	2	20	1	Primary 6 or lower	0	2		0	1	0	0	0	0	0	1	1	-0.978889	-0.800945	-0.626175	-0.373545	-0.981397	-1.03951	-1.30735	0.320744	-0.478136	1	Mother	-1.90358	-1.38237	-1.99998	-1.9459	-1.60506	-1.67413	-1.91316	-1.51977	-1.11498	2	Mother
509	3.72348	1	24	0.58	-0.26	0.846043	SMA	2	20	1	Primary 6 or lower	0	2		0	1	0	0	0	0	0	1	1	-0.235402	0.0281532	-0.435049	0.0331481	-0.298852	-0.649612	-0.598942	-0.528475	0.291071	1	Mother	0.255901	-0.0714833	0.349696	0.441865	0.382257	0.567258	0.272948	0.0752495	-0.141737	1	Mother
510	5.70568	1	0	0.18	-0.89	-0.02089	SMA	2	8	1	Primary 6 or lower	0	2		0	1	0	0	1	0	0	1	1	-0.849073	-0.632951	-0.424605	-1.26406	-0.297249	0.316605	0.519573	-0.525763	0.900808	1	Mother
510	5.70568	1	6	0.18	-0.89	-0.02089	SMA	2	8	1	Primary 6 or lower	0	2		0	1	0	0	1	0	0	1	1																							-0.423435	-0.769419	-0.0731437	-0.0465148
510	5.70568	1	12	0.18	-0.89	-0.02089	SMA	2	8	1	Primary 6 or lower	0	2		0	1	0	0	1	0	0	1	1																							-1.047	-0.774761	-0.904151	-0.766032
510	5.70568	1	24	0.18	-0.89	-0.02089	SMA	2	8	1	Primary 6 or lower	0	2		0	1	0	0	1	0	0	1	1																							1.18997	-0.159924	0.834114	2.2518
511	6.05339	2	0	-1.32	-2.68	-0.361793	CM	1	8	1	Primary 6 or lower	0	3		0	1	0	1	0	0	2	1	1																							0.942288	0.355204	2.89167	-0.775468
511	6.05339	2	6	-1.32	-2.68	-0.361793	CM	1	8	1	Primary 6 or lower	0	3		0	1	0	1	0	0	2	1	1																							-0.62987	-0.277441	-0.484541	-0.750565
511	6.05339	2	12	-1.32	-2.68	-0.361793	CM	1	8	1	Primary 6 or lower	0	3		0	1	0	1	0	0	2	1	1																							0.0138876	-0.283431	1.23381	-0.725389
511	6.05339	2	24	-1.32	-2.68	-0.361793	CM	1	8	1	Primary 6 or lower	0	3		0	1	0	1	0	0	2	1	1																							0.668028	-0.295249	1.27374	0.808226
513	4.39151	2	0	-0.56	0.15	0.152497		3	14	1	Secondary or higher		2	0										-1.12459	-1.12253	-0.81542	-0.661098	-0.682519	0.847184	0.733076	0.792478	-0.75663	1	Mother
513	4.39151	2	6	-0.56	0.15	0.152497		3	14	1	Secondary or higher		2	0										-1.06237	-1.04202	-0.718812	0.190022	-1.32089	0.204708	0.255516	-0.0812831	-0.671364	1	Mother	0.317704	0.611548	0.419496	-0.405881	0.802344	-0.725339	-0.0980315	0.0876584	0.811834	1	Mother
513	4.39151	2	12	-0.56	0.15	0.152497		3	14	1	Secondary or higher		2	0										0.115551	0.711711	0.15612	-1.11836	0.326707	-0.558751	-0.500833	-0.506028	0.613557	7	Mother	0.456791	0.915106	0.0660205	-0.483234	0.941542	-0.0143737	-0.788061	2.15184	0.169985	5	Mother
513	4.39151	2	24	-0.56	0.15	0.152497		3	14	1	Secondary or higher		2	0																																-0.633043	-0.589021	-0.0660296	-0.758049
514	2.21218	2	0	0.01	-2.78	-0.842027	SMA	2	7	0	Secondary or higher	0	3		0	1	0	0	0	0	0	1	1	-1.02005	-0.799161	-1.23109	0.689636	-1.39954	-0.677418	-0.849323	0.235126	0.0775343	1	Other
514	2.21218	2	6	0.01	-2.78	-0.842027	SMA	2	7	0	Secondary or higher	0	3		0	1	0	0	0	0	0	1	1	-0.593334	-1.39846	0.413288	1.1104	-1.38655	-0.610847	-0.781451	0.257092	-1.04884	1	Other	0.0510627	0.473543	-0.556185	-0.311847	-0.250892	0.708553	-0.976785	1.25627	0.0758198	1	Other
514	2.21218	2	12	0.01	-2.78	-0.842027	SMA	2	7	0	Secondary or higher	0	3		0	1	0	0	0	0	0	1	1	-1.52644	-0.651622	-1.05407	-1.49345	-1.37236	-1.73561	-1.67866	-1.06718	-0.96726	1	Other	-0.423157	0.0702569	-0.913378	-0.90216	-0.328943	0.052245	-1.46122	-0.169835	0.234885	1	Other
514	2.21218	2	24	0.01	-2.78	-0.842027	SMA	2	7	0	Secondary or higher	0	3		0	1	0	0	0	0	0	1	1	1.21106	0.858601	0.710421	1.50309	0.618676	-0.257275	-0.126759	-0.564603	-0.786588	7	Other	0.105999	-0.346496	0.111374	0.36761	0.397715	1.22715	-0.302267	-1.08669	0.103921	5	Other
515	4.87611	2	0	-0.22	-2.04	0.846043	SMA	2	7	0	Primary 7	0	2		0	1	0	0	0	0	1	1	1	-0.940983	-0.710597	-0.333044	-0.241367	-1.32153	-0.517078	-0.719204	0.367055	0.525987	1	Mother
515	4.87611	2	6	-0.22	-2.04	0.846043	SMA	2	7	0	Primary 7	0	2		0	1	0	0	0	0	1	1	1	0.482744	0.705183	-0.241659	1.04238	-0.00109669	1.59058	1.43562	1.28963	0.606643	1	Mother	1.54617	1.13363	1.64354	1.66165	1.14349	1.33467	1.71582	0.870854	1.12299	1	Mother
515	4.87611	2	12	-0.22	-2.04	0.846043	SMA	2	7	0	Primary 7	0	2		0	1	0	0	0	0	1	1	1	-0.210613	0.436432	0.227662	-0.695866	-0.642114	-0.981452	-0.720969	-1.3863	1.87774	7	Mother	0.105665	-0.581771	0.290108	1.17409	-0.447647	1.20066	1.00129	0.373061	-0.995551	1	Mother
515	4.87611	2	24	-0.22	-2.04	0.846043	SMA	2	7	0	Primary 7	0	2		0	1	0	0	0	0	1	1	1																							-0.625255	-0.906752	-0.47579	0.00229364
516	2.423	1	0	-1.07	-0.99	1.01085		3	9	0	Primary 7		3	0										-1.12823	-1.15478	-0.660779	-0.317462	-1.04657	-0.655105	-0.815369	0.21051	0.348193	1	Other	-0.671533	0.123122	-0.893705	-1.21091	-0.946314	-1.32494	-0.899904	0.921774	-0.234784		Mother
516	2.423	1	6	-1.07	-0.99	1.01085		3	9	0	Primary 7		3	0										-0.445952	-0.404889	-0.95464	0.533728	-0.37862	-2.01649	-1.84841	-1.56223	-0.76804	7	Mother	-1.4699	-0.623847	-1.73452	-2.04848	-1.23244	-1.70232	-2.00766	-0.181173	-0.713755	1	Mother
516	2.423	1	12	-1.07	-0.99	1.01085		3	9	0	Primary 7		3	0										-0.885096	-0.330902	-0.865866	-0.341882	-1.01819	-1.70713	-1.77719	-0.640336	-0.689687	1	Mother	-1.61997	-1.15126	-1.60809	-1.88343	-1.10242	-1.54738	-1.86878	-0.662862	-1.20531	1	Mother
516	2.423	1	24	-1.07	-0.99	1.01085		3	9	0	Primary 7		3	0										-0.265017	0.499067	-0.673695	0.496615	-0.988692	-1.43616	-1.20671	-1.48928	0.0804413	7	Mother	-0.784827	-0.423093	-0.723394	-0.763985	-1.03439	-1.21198	-0.310073	-0.333619	-0.391349	5	Mother
517	5.51951	1	0	-0.44	-0.75	-0.54105	SMA	2	5	1	Primary 7	0	3		0	1	0	0	1		0	1	1	1.11333	0.342167	-0.0701687	2.19617	1.00371	2.56391	2.57259	1.26271	0.869467	1	Mother	2.96813	2.80313	2.88032	1.79255	3.33348	1.61368	1.70148	3.51812	2.07027		Mother
517	5.51951	1	6	-0.44	-0.75	-0.54105	SMA	2	5	1	Primary 7	0	3		0	1	0	0	1		0	1	1																							1.62902	0.173511	0.341758	3.28038
517	5.51951	1	12	-0.44	-0.75	-0.54105	SMA	2	5	1	Primary 7	0	3		0	1	0	0	1		0	1	1
517	5.51951	1	24	-0.44	-0.75	-0.54105	SMA	2	5	1	Primary 7	0	3		0	1	0	0	1		0	1	1																							-0.233668	-0.473737	-0.86247	0.76976
518	2.96783	1	0	0.76	-0.43	1.71298	CM	1	19	0	Secondary or higher	1	2		0	1	0	1	1	0	2	1	1	0.0554104	-0.398361	-0.166915	0.532693	0.275786	0.26492	0.239374	0.237493	-0.761126	1	Mother
518	2.96783	1	6	0.76	-0.43	1.71298	CM	1	19	0	Secondary or higher	1	2		0	1	0	1	1	0	2	1	1	2.47379	0.685126	1.87733	3.5438	1.5967	0.459049	0.59274	-0.187388	1.72437	2	Mother	-0.431541	-1.12461	0.244328	0.0472114	0.198014	0.111576	0.0395674	-1.59028	-0.698696	1	Mother
518	2.96783	1	12	0.76	-0.43	1.71298	CM	1	19	0	Secondary or higher	1	2		0	1	0	1	1	0	2	1	1	0.541658	0.418986	0.0101114	0.941249	0.302963	-0.314272	-0.173664	-0.615387	0.596155	7	Mother	-1.2024	-0.611749	-1.71567	-1.32371	-1.38854	-0.562049	-1.71846	-0.181349	-0.717787	1	Mother
518	2.96783	1	24	0.76	-0.43	1.71298	CM	1	19	0	Secondary or higher	1	2		0	1	0	1	1	0	2	1	1	1.65738	1.91789	0.591183	1.34794	0.985507	-0.52312	-0.297857	-1.01518	0.164324	7	Mother	-0.811549	-0.353442	-1.19908	-0.968364	-0.895189	-0.501013	-1.20978	0.146105	-0.549954	1	Mother
519	5.02669	2	0	0.37	-0.86	-0.367663	SMA	2	9	1	Primary 7	0	3		0	1	0	0	0	0	0	1	1	0.442387	0.318052	0.0856229	0.18678	0.642486	-1.57223	-1.39	-1.42318	-0.649702	1	Mother	0.644244	1.12755	-0.15658	-0.106197	0.624866	0.952758	-0.898348	1.08038	1.01515		Other
519	5.02669	2	6	0.37	-0.86	-0.367663	SMA	2	9	1	Primary 7	0	3		0	1	0	0	0	0	0	1	1	-0.115793	-0.941049	-0.597662	0.605959	0.657317	0.898794	0.769017	0.849018	-0.564436	1	Other
519	5.02669	2	12	0.37	-0.86	-0.367663	SMA	2	9	1	Primary 7	0	3		0	1	0	0	0	0	0	1	1																							-0.482558	-0.27129	-0.505327	-0.405435
519	5.02669	2	24	0.37	-0.86	-0.367663	SMA	2	9	1	Primary 7	0	3		0	1	0	0	0	0	0	1	1																							0.965881	1.90876	-0.459817	0.393148
520	2.17659	2	0	1.7	-1.71	-1.90081	CM	1	14	0	Primary 7	0	3		1	0	5	1	0	0	2	1	1	0.588605	0.534798	2.66158	-1.46917	-0.094172	-1.04201	-1.27107	0.233364	0.0715427	7	Mother	3.34618	3.45185	2.49102	2.43986	2.38978	3.27449	1.60607	3.95173	2.81802		Mother
520	2.17659	2	6	1.7	-1.71	-1.90081	CM	1	14	0	Primary 7	0	3		1	0	5	1	0	0	2	1	1	2.62701	1.27337	2.74409	1.97546	1.8781	2.61541	2.40307	2.05248	2.54644	7	Mother	3.29383	3.7308	2.48631	1.70407	2.93747	2.32832	1.10611	4.09309	3.1211	1	Mother
520	2.17659	2	12	1.7	-1.71	-1.90081	CM	1	14	0	Primary 7	0	3		1	0	5	1	0	0	2	1	1	0.946065	-0.663372	3.61119	-0.62771	0.585086	1.72604	1.91797	0.27743	-0.379185	1	Other	2.20096	2.73249	1.51066	0.468917	2.63835	1.39035	-0.225209	3.60871	1.98252	1	Other
520	2.17659	2	24	1.7	-1.71	-1.90081	CM	1	14	0	Primary 7	0	3		1	0	5	1	0	0	2	1	1	3.67785	2.51397	2.63717	1.50613	3.88116	2.59864	2.49138	1.67654	1.59521	7	Mother	3.76209	4.05261	3.37821	1.84921	3.99227	1.73214	1.75857	3.62733	3.76926	5	Mother
521	3.7755	1	0	-0.59	-1.73	-0.367663	SMA	2	7	0	Primary 6 or lower	0	3		0	1	0	0		0	0	1	1	1.5195	1.06964	1.93686	1.37623	0.299435	1.22439	1.61187	-0.621353	0.575876	1	Mother	1.01667	1.6822	0.695723	0.030865	0.712052	-0.329609	0.342377	0.0961777	2.30322		Mother
521	3.7755	1	6	-0.59	-1.73	-0.367663	SMA	2	7	0	Primary 6 or lower	0	3		0	1	0	0		0	0	1	1	0.960643	0.814386	-0.697194	1.79554	0.967309	0.221847	0.717173	-1.49538	0.059701	1	Mother	1.37791	0.817252	1.80946	1.22475	1.70571	0.927355	1.33059	0.893688	0.695783	1	Mother
521	3.7755	1	12	-0.59	-1.73	-0.367663	SMA	2	7	0	Primary 6 or lower	0	3		0	1	0	0		0	0	1	1	2.26298	1.89874	0.17826	1.35098	2.94159	1.49455	2.18151	-1.47057	-0.456474	1	Mother	2.45765	1.94051	2.43437	2.16458	2.27252	2.18432	1.89945	2.32498	1.50457	1	Mother
521	3.7755	1	24	-0.59	-1.73	-0.367663	SMA	2	7	0	Primary 6 or lower	0	3		0	1	0	0		0	0	1	1	5	2.72697	4.2678	5	4.27718	3.44037	3.30539	2.17416	5	7	Mother	3.3438	3.48325	2.82727	1.75582	3.61804	1.97099	1.3581	2.96754	3.28142	1	Mother
522	3.19507	2	0	1.16	0.36	1.88636	CM	1	9	0	Primary 7	0	3		0	0	1	1	0	0	2	0	0	-1.0234	-1.31273	-1.04362	0.23293	-0.717552	1.3861	1.24382	1.18265	-0.357523	1	Mother	1.20103	1.26029	1.05679	0.895627	0.753474	0.888103	0.861578	1.11563	1.21935		Mother
522	3.19507	2	6	1.16	0.36	1.88636	CM	1	9	0	Primary 7	0	3		0	0	1	1	0	0	2	0	0	-0.974634	-0.244906	-0.967903	-0.640955	-1.03253	-0.949306	-1.05447	-0.145959	-0.290693	1	Other	-0.302223	0.122479	-0.424056	-0.614938	-0.416172	-0.615001	-0.487713	0.928464	-0.261161	1	Other
522	3.19507	2	12	1.16	0.36	1.88636	CM	1	9	0	Primary 7	0	3		0	0	1	1	0	0	2	0	0	-0.545895	-0.506694	-0.880173	-1.08449	0.613946	0.915978	1.23619	-0.572602	-0.813781	1	Mother	0.319342	1.34731	-0.176914	-0.705883	-0.0742577	-1.00697	-0.350466	1.07877	1.33955	2	Mother
522	3.19507	2	24	1.16	0.36	1.88636	CM	1	9	0	Primary 7	0	3		0	0	1	1	0	0	2	0	0	2.19261	1.67464	0.885881	1.04797	2.60522	2.75479	2.23428	3.07633	5	7	Mother	2.89668	2.33707	3.29418	1.71004	4.06948	1.53339	1.64965	1.11528	2.66102	5	Mother
523	2.07255	1	0	-1.29	-2.13	-1.90081	SMA	2	7	0	Primary 6 or lower	0	3		0	0	0	0	1	0	0	1	1	-0.426801	-1.21049	-0.337675	0.555251	-0.0770308	-1.6657	-1.7016	-0.705689	-0.911839	1	Mother
523	2.07255	1	6	-1.29	-2.13	-1.90081	SMA	2	7	0	Primary 6 or lower	0	3		0	0	0	0	1	0	0	1	1	0.377538	-0.463209	2.4849	-0.320911	-0.389362	0.922189	0.870783	0.666712	-0.8298	1	Mother	-0.839217	0.0574344	-0.978727	-1.92452	-0.2678	-1.82445	-1.69777	0.0158317	0.132313	1	Mother
523	2.07255	1	12	-1.29	-2.13	-1.90081	SMA	2	7	0	Primary 6 or lower	0	3		0	0	0	0	1	0	0	1	1	-0.679985	-1.05642	0.627076	-0.333052	-1.02846	-0.202984	-0.0268479	-0.657691	-0.748682	1	Mother	-0.0432993	-0.112972	0.49642	-0.102304	0.0802323	-0.846413	0.542793	-0.143597	-0.0316834	1	Mother
523	2.07255	1	24	-1.29	-2.13	-1.90081	SMA	2	7	0	Primary 6 or lower	0	3		0	0	0	0	1	0	0	1	1
524	2.43395	2	0	-1.72	-1.82	1.01085	CM	1	12	0	Primary 7	0	2		0	1	1	1	1	0	2	1	1	-0.248337	-0.763908	-0.798849	1.97987	-0.739839	-0.644132	-0.399086	-1.10216	0.114867	5	Mother
524	2.43395	2	6	-1.72	-1.82	1.01085	CM	1	12	0	Primary 7	0	2		0	1	1	1	1	0	2	1	1
524	2.43395	2	12	-1.72	-1.82	1.01085	CM	1	12	0	Primary 7	0	2		0	1	1	1	1	0	2	1	1	-1.25272	-1.28835	-1.01438	0.229067	-1.36627	-0.985879	-1.09175	-0.158026	-0.932231	1	Mother	-1.6132	-1.48916	-1.34568	-1.20945	-1.55136	-1.2412	-0.979777	-0.735623	-1.6298	1	Mother
524	2.43395	2	24	-1.72	-1.82	1.01085	CM	1	12	0	Primary 7	0	2		0	1	1	1	1	0	2	1	1	-0.757396	-0.794159	-0.0433611	-0.228122	-1.01032	-1.55398	-1.35471	-1.45667	-0.763543	7	Mother	-1.60924	-1.23086	-1.56232	-1.61627	-1.27144	-1.45271	-1.51949	-1.04195	-1.1398	1	Mother
525	7.27447	1	0	0.82	0.15	0.247929	CM	1	10	1	Primary 7	1	2		0	0	10	1	1	0	2	0	0																							0.389727	-0.154938	0.392738	0.746897
525	7.27447	1	6	0.82	0.15	0.247929	CM	1	10	1	Primary 7	1	2		0	0	10	1	1	0	2	0	0																							-0.549345	-0.787583	-0.4363	0.0298297
525	7.27447	1	12	0.82	0.15	0.247929	CM	1	10	1	Primary 7	1	2		0	0	10	1	1	0	2	0	0																							0.410897	-0.16682	-0.416171	1.53881
525	7.27447	1	24	0.82	0.15	0.247929	CM	1	10	1	Primary 7	1	2		0	0	10	1	1	0	2	0	0																							2.01484	2.32815	0.0486168	1.95988
526	10.0726	1	0	-2.8	-2.14	-0.514224		3	9	1	Primary 7		2	1																																-1.45058	-1.44147	-1.19357	-0.597965
526	10.0726	1	6	-2.8	-2.14	-0.514224		3	9	1	Primary 7		2	1																																-1.43996	-1.44743	-1.17344	-0.572925
526	10.0726	1	12	-2.8	-2.14	-0.514224		3	9	1	Primary 7		2	1																																1.26115	1.99364	-1.15353	1.67776
526	10.0726	1	24	-2.8	-2.14	-0.514224		3	9	1	Primary 7		2	1																																0.334481	1.6674	-1.10999	-0.123009
527	5.11704	2	0	-4.02	-1.95	-1.06121	SMA	2	7	0	Primary 6 or lower	0	3		0	1	0	0		0	1	1	1	-0.0428325	-0.672298	1.27269	-0.679379	-0.00807132	1.19558	1.39917	-0.070436	-0.634492	2	Mother	0.624215	0.810525	0.845606	-0.328211	1.5038	-0.652426	-0.0326762	0.476125	0.883728		Mother
527	5.11704	2	6	-4.02	-1.95	-1.06121	SMA	2	7	0	Primary 6 or lower	0	3		0	1	0	0		0	1	1	1	-0.725428	-0.257313	-0.580951	-0.692072	-0.646523	-0.525054	-1.02155	1.30278	-0.549687	1	Mother	-1.05847	-0.638163	-1.21726	-1.03875	-1.12998	-1.02981	-0.93075	-0.30993	-0.722815	1	Mother
527	5.11704	2	12	-4.02	-1.95	-1.06121	SMA	2	7	0	Primary 6 or lower	0	3		0	1	0	0		0	1	1	1																							-0.322499	-0.272293	0.347122	-0.772202
527	5.11704	2	24	-4.02	-1.95	-1.06121	SMA	2	7	0	Primary 6 or lower	0	3		0	1	0	0		0	1	1	1																							-0.456543	-0.599252	0.393069	-0.715046
528	6.46133	2	0	-1.26	-0.15	1.31494	CM	1	11	1	Primary 6 or lower	0	2		0	0	0	1	0	0	2	0	0																							-0.315288	-0.903061	-0.488261	0.728751
528	6.46133	2	6	-1.26	-0.15	1.31494	CM	1	11	1	Primary 6 or lower	0	2		0	0	0	1	0	0	2	0	0																							0.327258	0.34507	0.378738	0.00909795
528	6.46133	2	12	-1.26	-0.15	1.31494	CM	1	11	1	Primary 6 or lower	0	2		0	0	0	1	0	0	2	0	0																							-0.295272	0.339145	-0.4503	-0.707969
528	6.46133	2	24	-1.26	-0.15	1.31494	CM	1	11	1	Primary 6 or lower	0	2		0	0	0	1	0	0	2	0	0																							0.0426147	0.640525	-0.409822	-0.286632
529	7.10472	2	0	-1.07	-2.08	-0.0569319	CM	1	9	1	Primary 7	1	2		0	1	0	1	1	0	2	1	1																							2.23061	0.969491	1.66009	2.61566
529	7.10472	2	6	-1.07	-2.08	-0.0569319	CM	1	9	1	Primary 7	1	2		0	1	0	1	1	0	2	1	1																							-0.607373	-0.290069	-1.29093	0.0444804
529	7.10472	2	12	-1.07	-2.08	-0.0569319	CM	1	9	1	Primary 7	1	2		0	1	0	1	1	0	2	1	1																							0.511545	0.330467	0.00354781	0.812444
529	7.10472	2	24	-1.07	-2.08	-0.0569319	CM	1	9	1	Primary 7	1	2		0	1	0	1	1	0	2	1	1																							0.058132	0.318455	-0.380394	0.120961
531	2.57084	2	0	-1.65	-1.24	-0.0479372		3	9	0	Primary 7		3	1										-1.22416	-1.41195	-1.16268	-0.183283	-0.735831	-0.503836	-0.933206	1.15173	-1.06313	1	Mother	-1.5296	-1.07863	-1.19027	-1.99329	-0.70145	-2.04513	-1.63114	-0.989712	-0.91853		Mother
531	2.57084	2	6	-1.65	-1.24	-0.0479372		3	9	0	Primary 7		3	1										-1.28669	-0.662502	-1.06712	-1.49173	-0.72116	-1.62613	-1.4116	-1.51999	-0.978782	1	Mother	-1.66579	-1.24186	-1.42079	-2.06967	-0.774911	-1.87834	-1.901	-1.45977	-0.915154	1	Mother
531	2.57084	2	12	-1.65	-1.24	-0.0479372		3	9	0	Primary 7		3	1										-1.23053	-0.58982	-0.979913	-0.639368	-1.36097	-1.19826	-1.20287	-0.5985	-0.901812	1	Mother	-1.87434	-1.42149	-1.78542	-1.90753	-1.50088	-1.72614	-1.76457	-0.993466	-1.4094	1	Mother
531	2.57084	2	24	-1.65	-1.24	-0.0479372		3	9	0	Primary 7		3	1										-0.600022	-1.08598	0.00833693	-1.09883	0.30402	-1.75279	-1.72954	-0.993822	-0.717915	7	Mother	-0.785011	-1.12935	0.0999741	-0.885019	0.511673	-1.36248	-0.390221	-1.27027	-0.889749	1	Mother
532	1.97947	2	0	-1.51	-0.89	0.481456	SMA	2	10	0	Secondary or higher	0	2		0	1	0	0	0	0	1	1	1	1.68111	1.84308	1.0642	0.263559	1.53306	0.485151	0.2252	1.12245	-0.562161	1	Mother
532	1.97947	2	6	-1.51	-0.89	0.481456	SMA	2	10	0	Secondary or higher	0	2		0	1	0	0	0	0	1	1	1	0.749006	0.581802	1.15819	-0.1808	0.567689	-0.03963	0.0230798	-0.201415	2.5234	2	Mother	-0.517914	-0.413823	-0.60601	0.131209	-1.58268	0.102401	0.226549	0.56254	-0.7898	1	Mother
532	1.97947	2	12	-1.51	-0.89	0.481456	SMA	2	10	0	Secondary or higher	0	2		0	1	0	0	0	0	1	1	1	0.310534	-0.682957	1.24801	-0.624606	0.90808	0.51005	0.233909	1.17017	-1.00044	1	Mother	-0.500046	-0.822237	-0.355894	0.298201	-1.02428	0.531709	0.157385	-0.551144	-0.79631	1	Mother
532	1.97947	2	24	-1.51	-0.89	0.481456	SMA	2	10	0	Secondary or higher	0	2		0	1	0	0	0	0	1	1	1	0.553667	1.14563	-0.126913	-0.649026	0.936459	-0.661727	-0.311612	-1.47836	0.96427	7	Mother	-0.453628	-0.810139	-0.337047	0.133787	-0.540112	0.581809	-0.182453	-0.234427	-0.961425	1	Mother
533	3.01711	2	0	-1.02	-0.73	0.49927	CM	1	8	0	Primary 7	1	3		0	1	1	1	0	0	2	1	1	-1.29342	-2.01082	-1.07757	0.237414	-0.722763	-0.436853	-0.309847	-0.623855	-0.988	1	Mother
533	3.01711	2	6	-1.02	-0.73	0.49927	CM	1	8	0	Primary 7	1	3		0	1	1	1	0	0	2	1	1	-1.10779	-1.26137	-0.982002	-0.639092	-0.381491	-1.31965	-1.34331	-0.599042	-0.903656	1	Other	-1.60226	-1.6595	-1.17737	-1.14926	-1.29052	-1.1847	-0.929127	-1.31394	-1.57408	1	Other
533	3.01711	2	12	-1.02	-0.73	0.49927	CM	1	8	0	Primary 7	1	3		0	1	1	1	0	0	2	1	1	-1.05096	-1.18782	-0.89375	-0.650751	-0.367943	-0.771204	-0.994972	0.322717	-0.825764	1	Other	-1.53233	-1.36927	-1.17389	-1.49328	-0.94784	-1.57575	-1.21042	-1.79652	-0.938958	1	Other
533	3.01711	2	24	-1.02	-0.73	0.49927	CM	1	8	0	Primary 7	1	3		0	1	1	1	0	0	2	1	1	1.42964	2.32051	0.467214	0.619825	0.641203	0.696446	0.962339	-0.526502	1.14448	7	Other	-0.14662	-0.0583864	0.0759324	-0.121731	-0.241067	-0.697085	0.34665	0.115393	-0.126797	1	Other
534	1.88364	2	0	-1.98	-2.94	-0.577331	SMA	2	16		Primary 7	0	2		0	1	0	0	0	0	1	1	1	-0.315936	-0.516483	0.266027	-0.597909	-0.10275	0.351018	0.0717693	1.1177	-1.17881	1	Mother
534	1.88364	2	6	-1.98	-2.94	-0.577331	SMA	2	16		Primary 7	0	2		0	1	0	0	0	0	1	1	1	0.749679	-0.0871361	0.769291	1.11489	0.56785	-0.517807	-0.669917	0.248279	0.122241	1	Mother	1.41866	1.34252	1.35077	1.27639	0.766515	1.1944	1.27657	-0.386347	2.11147	2	Mother
534	1.88364	2	12	-1.98	-2.94	-0.577331	SMA	2	16		Primary 7	0	2		0	1	0	0	0	0	1	1	1	-0.307172	-0.679475	0.472297	-1.48904	0.582119	0.992337	1.06986	0.272413	-0.996757	1	Mother	0.613894	0.823309	0.749906	0.178941	0.475805	-0.27863	0.583277	1.04047	0.660615	1	Mother
534	1.88364	2	24	-1.98	-2.94	-0.577331	SMA	2	16		Primary 7	0	2		0	1	0	0	0	0	1	1	1	-0.178702	0.49149	0.281832	-0.651509	-0.693662	-0.646934	-0.574063	-0.574636	-0.820694	7	Other	-1.52058	-1.35799	-1.16571	-1.60963	-0.726002	-1.56573	-1.41111	-1.78668	-0.929072	5	Other
535	5.6564	2	0	-1.28	-0.33	0.672657	CM	1	9	1	Secondary or higher	0	3		0	0	2	1		0	2	0	0	-0.472897	-0.921464	-0.574162	1.0348	-0.645481	-0.280212	-0.183498	-0.493147	-0.543696	1	Mother	-0.270805	-1.2096	0.38108	0.498185	0.373927	0.617298	0.337939	-1.24898	-1.0333		Mother
535	5.6564	2	6	-1.28	-0.33	0.672657	CM	1	9	1	Secondary or higher	0	3		0	0	2	1		0	2	0	0																							-0.323076	0.354751	-0.50303	-0.773563
535	5.6564	2	12	-1.28	-0.33	0.672657	CM	1	9	1	Secondary or higher	0	3		0	0	2	1		0	2	0	0																							-0.312577	0.348858	-0.483119	-0.748795
535	5.6564	2	24	-1.28	-0.33	0.672657	CM	1	9	1	Secondary or higher	0	3		0	0	2	1		0	2	0	0																							-0.133251	0.0236799	0.405869	-0.699124
536	8.99932	1	0	-0.96	0.11	1.31494		3	14	1	Secondary or higher		2	1																																-0.840103	-0.175336	-1.23646	-0.651311
536	8.99932	1	6	-0.96	0.11	1.31494		3	14	1	Secondary or higher		2	1																																-1.4605	-1.4359	-1.21239	-0.621372
536	8.99932	1	12	-0.96	0.11	1.31494		3	14	1	Secondary or higher		2	1
536	8.99932	1	24	-0.96	0.11	1.31494		3	14	1	Secondary or higher		2	1																																-0.47995	-0.826534	0.544364	-0.54843
537	6.48597	1	0	-1.33	-1.8	0.552791	CM	1	11	1	Secondary or higher	1	2		0	1	3	1	0	0	2	1	1																							-0.259972	-0.145613	-0.487827	-0.034267
537	6.48597	1	6	-1.33	-1.8	0.552791	CM	1	11	1	Secondary or higher	1	2		0	1	3	1	0	0	2	1	1																							-0.407802	-0.151473	-0.468026	-0.380621
537	6.48597	1	12	-1.33	-1.8	0.552791	CM	1	11	1	Secondary or higher	1	2		0	1	3	1	0	0	2	1	1																							-0.397073	-0.157495	-0.447677	-0.355309
537	6.48597	1	24	-1.33	-1.8	0.552791	CM	1	11	1	Secondary or higher	1	2		0	1	3	1	0	0	2	1	1																							-0.534232	-0.796066	0.0168912	-0.305501
538	3.28542	1	0	0.17	-1.25	-1.58137	CM	1	3	0	Primary 6 or lower	1	2		1	1	21	1	1	0	2	1	1	1.08706	-0.347876	3.01323	1.38857	-0.368118	-0.286161	-0.405861	0.253221	2.89545	1	Other
538	3.28542	1	6	0.17	-1.25	-1.58137	CM	1	3	0	Primary 6 or lower	1	2		1	1	21	1	1	0	2	1	1	2.88706	2.41274	2.72093	-0.352091	3.23949	0.988182	1.33769	-0.620268	1.7806	2	Other
538	3.28542	1	12	0.17	-1.25	-1.58137	CM	1	3	0	Primary 6 or lower	1	2		1	1	21	1	1	0	2	1	1	0.477105	-0.843596	2.44222	0.497098	-0.33605	-0.361287	-0.515808	0.307457	-0.523304	1	Other	2.74497	4.01395	1.22669	0.24543	2.80189	1.50708	-0.735148	3.14593	3.95157	2	Other
538	3.28542	1	24	0.17	-1.25	-1.58137	CM	1	3	0	Primary 6 or lower	1	2		1	1	21	1	1	0	2	1	1	2.08948	1.32555	4.19365	-0.392102	0.999777	3.74127	3.38466	3.05375	4.45	7	Other	4.51863	4.74109	3.45491	2.76119	4.1497	3.47683	1.87113	4.74185	4.1203	1	Other
539	6.09446	2	0	-1.6	-2.03	-0.361793	SMA	2	8	1	Primary 6 or lower	0	2		0	1	0	0	0	0	1	1	1																							0.151796	-0.272002	1.61972	-0.773427
539	6.09446	2	6	-1.6	-2.03	-0.361793	SMA	2	8	1	Primary 6 or lower	0	2		0	1	0	0	0	0	1	1	1																							0.320509	-0.277862	0.365938	0.735147
539	6.09446	2	12	-1.6	-2.03	-0.361793	SMA	2	8	1	Primary 6 or lower	0	2		0	1	0	0	0	0	1	1	1																							0.0157913	-0.2845	0.388365	0.0210735
539	6.09446	2	24	-1.6	-2.03	-0.361793	SMA	2	8	1	Primary 6 or lower	0	2		0	1	0	0	0	0	1	1	1																							1.14521	1.58358	0.853699	0.0718338
540	7.00068	2	0	1.54	1.55	0.857652		3	8	1	Primary 7		2	1																																0.0126185	0.344001	0.382348	-0.728383
540	7.00068	2	6	1.54	1.55	0.857652		3	8	1	Primary 7		2	1																																0.4992	0.337396	-0.0198635	0.783322
540	7.00068	2	12	1.54	1.55	0.857652		3	8	1	Primary 7		2	1																																0.667971	0.958224	0.424576	0.0661182
540	7.00068	2	24	1.54	1.55	0.857652		3	8	1	Primary 7		2	1																																-1.20965	-0.934079	-1.23252	-0.624821
541	3.09651	2	0	1.88	-0.62	-0.02089	CM	1	11	0	Primary 6 or lower	0	3		0	1	1	1	0	0	2	1	1	2.43872	2.02065	0.107416	2.39512	2.54558	0.293563	-0.0201628	1.17777	3.82952	2	Other	1.60474	1.9251	0.418986	2.00391	-0.768028	2.7631	1.25152	1.40031	1.99241		Other
541	3.09651	2	6	1.88	-0.62	-0.02089	CM	1	11	0	Primary 6 or lower	0	3		0	1	1	1	0	0	2	1	1	0.492795	0.731952	0.55846	-0.204599	0.268746	0.820641	0.861458	0.294786	-0.920709	1	Other	1.12172	1.22639	1.23923	0.720215	0.815425	0.144298	1.13743	1.82188	0.808897	1	Other
541	3.09651	2	12	1.88	-0.62	-0.02089	CM	1	11	0	Primary 6 or lower	0	3		0	1	1	1	0	0	2	1	1	-0.69318	-0.536724	-0.136313	-1.51167	-0.0447883	-0.190125	-0.180386	-0.132536	-0.845583	1	Other	1.0747	1.15961	0.382801	1.38657	-0.340454	1.92812	0.851233	2.6015	0.311053	1	Other
541	3.09651	2	24	1.88	-0.62	-0.02089	CM	1	11	0	Primary 6 or lower	0	3		0	1	1	1	0	0	2	1	1	1.663	1.29665	-0.335655	1.48674	2.27068	0.558615	0.388837	0.815799	2.92576	7	Other	1.96192	2.35251	1.38747	1.61392	0.578977	1.17062	1.77845	2.29427	2.08881	5	Other
542	2.72964	1	0	1.04	-1.99	0.746153	CM	1	8	0	Secondary or higher	1	2		0	1	1	1	1	0	2	0	0	-0.346087	-0.771129	-0.992239	0.538695	0.268811	-0.84858	-0.490911	-1.57199	0.399813	1	Mother
542	2.72964	1	6	1.04	-1.99	0.746153	CM	1	8	0	Secondary or higher	1	2		0	1	1	1	1	0	2	0	0	-0.28286	-0.354404	-0.894065	0.0937845	0.283883	-0.292325	-0.134611	-0.647657	-0.714576	1	Mother
542	2.72964	1	12	1.04	-1.99	0.746153	CM	1	8	0	Secondary or higher	1	2		0	1	1	1	1	0	2	0	0	-0.108671	0.0453477	-0.816256	0.947388	-0.357375	0.00840392	-0.349719	1.17023	-0.645902	1	Mother	-1.46325	-1.40472	-0.926415	-1.28309	-1.02976	-1.73334	-0.742776	-1.84544	-0.958851	1	Mother
542	2.72964	1	24	1.04	-1.99	0.746153	CM	1	8	0	Secondary or higher	1	2		0	1	1	1	1	0	2	0	0	-1.22604	-0.799639	-0.624608	-1.23763	-0.981156	-1.39753	-1.44486	-0.577694	-0.476753	1	Mother	0.365682	0.0241442	0.446361	0.724567	0.104627	0.781499	0.605432	-0.249519	0.176371	1	Mother
543	1.97125	1	0	3.3	0.54	-0.312634	CM	1	8	0	Secondary or higher	1	2		0	1	0	1	1	0	2	1	1	-0.0670065	-0.221876	0.422895	-0.73802	0.246604	1.31284	0.919472	1.98583	2.0737	2	Mother
543	1.97125	1	6	3.3	0.54	-0.312634	CM	1	8	0	Secondary or higher	1	2		0	1	0	1	1	0	2	1	1	-0.746911	-0.473219	-1.03663	-1.18321	0.261997	-0.40451	-0.248989	-0.684673	-0.239882	1	Mother
543	1.97125	1	12	3.3	0.54	-0.312634	CM	1	8	0	Secondary or higher	1	2		0	1	0	1	1	0	2	1	1	-0.437208	-1.06338	-0.941063	-0.331948	0.92987	0.748439	0.79905	0.238984	-0.756056	1	Mother	-0.447274	-0.24633	-0.126507	-0.498918	-0.572278	-1.13354	0.110366	-0.791696	0.11502	1	Mother
543	1.97125	1	24	3.3	0.54	-0.312634	CM	1	8	0	Secondary or higher	1	2		0	1	0	1	1	0	2	1	1	-0.557232	-0.227755	-0.742104	0.0737103	-0.672593	0.186506	0.403608	-0.608201	-0.580455	1	Mother	0.401753	0.261264	0.523448	0.379093	0.359391	0.303886	0.42162	0.182961	0.296333	1	Mother
544	3.66598	1	0	0.5	-1.62	-0.714437	CM	1	14	0	Secondary or higher	0	3		0	1	0	1	0	0	2	1	1	-1.09962	-0.957188	-0.813645	-0.34878	-1.01018	-0.82779	-1.04146	0.272068	-0.643598	1	Other	-0.186707	-0.814828	0.665977	-0.262023	1.10831	-0.366065	-0.109657	-1.84096	-0.148949		Other
544	3.66598	1	6	0.5	-1.62	-0.714437	CM	1	14	0	Secondary or higher	0	3		0	1	0	1	0	0	2	1	1	-0.171878	0.459026	-0.721738	0.07102	-0.342865	1.16053	1.25255	0.295931	0.0380388	1	Other	0.609211	0.652109	0.552451	0.925063	-0.464477	0.339432	1.29219	1.48542	0.1703	1	Other
544	3.66598	1	12	0.5	-1.62	-0.714437	CM	1	14	0	Secondary or higher	0	3		0	1	0	1	0	0	2	1	1	-1.2368	-1.48337	-0.641319	-0.371545	-0.983722	-0.572432	-0.4869	-0.582032	-0.491502	1	Other	1.10529	1.27782	0.911387	0.566473	0.93385	0.47979	0.57929	0.989419	1.27519	1	Other
544	3.66598	1	24	0.5	-1.62	-0.714437	CM	1	14	0	Secondary or higher	0	3		0	1	0	1	0	0	2	1	1	1.12476	2.03148	0.337532	-0.397827	1.00643	2.21863	1.893	2.16616	2.08617	7	Other	2.06485	3.53971	1.07252	-0.460912	2.29237	-0.535675	-0.367524	3.54854	3.06732	5	Other
545	6.43395	2	0	-0.05	-0.55	1.01008		3	11	1	Secondary or higher		2	0																																-1.10722	-0.902737	-0.913884	-0.756552
545	6.43395	2	6	-0.05	-0.55	1.01008		3	11	1	Secondary or higher		2	0																																-0.93851	-0.908597	-0.469554	-0.731921
545	6.43395	2	12	-0.05	-0.55	1.01008		3	11	1	Secondary or higher		2	0																																-0.136423	0.338821	-0.449206	-0.335623
545	6.43395	2	24	-0.05	-0.55	1.01008		3	11	1	Secondary or higher		2	0																																-0.906668	-0.61311	-0.833695	-0.656801
546	3.91513	1	0	-0.83	-0.81	1.53959		3	9	0	Primary 6 or lower		3	1										-0.820861	-0.917584	-0.766125	-0.355058	-0.349679	-1.26939	-1.28087	-0.614438	-0.601656	1	Other
546	3.91513	1	6	-0.83	-0.81	1.53959		3	9	0	Primary 6 or lower		3	1										-0.757635	-0.835762	-0.667951	0.495856	-0.98781	-1.55139	-1.6184	-0.588947	-0.515008	1	Other	-1.21524	-0.99658	-1.32624	-1.26141	-0.812549	-0.656866	-1.55916	-1.27445	-0.703628	1	Other
546	3.91513	1	12	-0.83	-0.81	1.53959		3	9	0	Primary 6 or lower		3	1										-0.452976	0.242067	-0.580221	-1.2435	0.00546235	-1.00335	-1.13172	-0.116746	-0.437577	1	Other	-0.704213	-0.941283	-0.956895	-0.209118	-0.684059	0.85897	-1.00255	-0.807256	-0.874814	1	Other
546	3.91513	1	24	-0.83	-0.81	1.53959		3	9	0	Primary 6 or lower		3	1										0.538333	2.41035	-0.389617	0.459088	-0.945081	-0.0151121	0.408876	-1.41552	1.53221	7	Mother	-0.31443	0.719437	-1.41869	-0.997984	-0.831748	-0.171078	-1.54308	1.42065	0.258611	1	Other
548	2.80356	1	0	-0.51	-0.79	1.01085		3	10	0	Secondary or higher		3	1										-1.08148	-0.0895701	-0.978139	-1.19093	-1.03543	-1.79548	-1.7285	-1.11891	-0.78878	1	Other	-0.0809363	1.55212	-0.912541	-1.96514	0.0136928	-1.74334	-1.83474	1.04613	1.66203		Other
548	2.80356	1	6	-0.51	-0.79	1.01085		3	10	0	Secondary or higher		3	1										-1.14435	-0.345264	-0.883098	-1.20349	-1.02084	-2.07994	-1.92978	-1.54365	-0.704897	7	Other	-0.881436	0.101385	-1.02161	-1.40736	-1.34108	-2.12254	-0.637666	-0.692386	0.536936	1	Other
548	2.80356	1	12	-0.51	-0.79	1.01085		3	10	0	Secondary or higher		3	1
548	2.80356	1	24	-0.51	-0.79	1.01085		3	10	0	Secondary or higher		3	1
549	3.50445	1	0	1.42	-0.3	-1.2346	SMA	2	7	0	Primary 6 or lower	0	3		1	1	0	0	0	0	1	1	1	-0.00275215	-0.313058	-0.0645635	0.951113	-0.361704	-0.373036	-0.788644	1.16291	-0.670791	1	Mother	-0.470792	-0.641414	-0.233339	-0.573357	0.209486	-0.147296	-0.786891	-1.25996	-0.201971		Mother
549	3.50445	1	6	1.42	-0.3	-1.2346	SMA	2	7	0	Primary 6 or lower	0	3		1	1	0	0	0	0	1	1	1
549	3.50445	1	12	1.42	-0.3	-1.2346	SMA	2	7	0	Primary 6 or lower	0	3		1	1	0	0	0	0	1	1	1
549	3.50445	1	24	1.42	-0.3	-1.2346	SMA	2	7	0	Primary 6 or lower	0	3		1	1	0	0	0	0	1	1	1
550	3.32923	2	0	-0.43	-1.65	-0.714437	CM	1	6	0	Primary 6 or lower	1	3		1	1	0	1	0	0	2	1	1	0.109795	0.383121	0.541749	-0.634333	-0.0604213	-1.34801	-1.64975	0.290447	0.26558	1	Other	0.479575	0.725768	0.482197	0.181042	0.150678	-0.15741	0.482252	0.525682	0.780139		Other
550	3.32923	2	6	-0.43	-1.65	-0.714437	CM	1	6	0	Primary 6 or lower	1	3		1	1	0	1	0	0	2	1	1	-0.571791	0.464507	-0.920382	-1.51111	-0.0454297	-0.313162	-0.461272	0.315802	-0.84927	1	Other	0.679272	0.332734	0.98788	-0.0184824	2.00109	0.558112	-0.413371	-0.257688	0.626028	1	Other
550	3.32923	2	12	-0.43	-1.65	-0.714437	CM	1	6	0	Primary 6 or lower	1	3		1	1	0	1	0	0	2	1	1	-1.37914	-0.460996	-0.825342	-1.52367	-1.33724	-0.477872	-0.38502	-0.558366	-0.765387	1	Other	0.486741	0.285433	-0.465446	1.17443	-0.634224	2.90434	-0.264688	0.538927	0.145259	1	Other
550	3.32923	2	24	-0.43	-1.65	-0.714437	CM	1	6	0	Primary 6 or lower	1	3		1	1	0	1	0	0	2	1	1	0.108488	0.702571	-0.244792	-1.11691	0.651625	-0.208131	0.184203	-1.40772	-0.59716	7	Other	0.379096	-0.159003	0.783638	0.512589	0.92548	0.511573	0.452852	-0.402082	-0.0099696	1	Other
552	2.423	1	0	-0.9	-0.99			3			Not known		3	0										-0.755992	-0.48497	-1.05073	0.546421	-1.04657	-0.774855	-0.676602	-0.688334	-0.852845	1	Mother	-2.3849	-1.63117	-2.36017	-2.6082	-2.01343	-2.41511	-2.36765	-1.93025	-1.20127		Mother
552	2.423	1	6	-0.9	-0.99			3			Not known		3	0
552	2.423	1	12	-0.9	-0.99			3			Not known		3	0
552	2.423	1	24	-0.9	-0.99			3			Not known		3	0
553	2.07529	1	0	-2.58	-2.16	1.01085		3	16	0	Primary 7		3	0										-0.426465	-0.540242	0.0527928	-0.308701	-0.403552	-0.707294	-0.591043	-0.705554	0.289659	1	Mother
553	2.07529	1	6	-2.58	-2.16	1.01085		3	16	0	Primary 7		3	0										0.751122	0.20834	2.09704	0.110754	-0.0624402	-0.513165	-0.376444	-0.681012	1.57412	7	Mother	0.104641	0.412395	0.490715	-0.650375	0.588955	-1.27572	-0.0170774	0.653195	0.29699	1	Mother
553	2.07529	1	12	-2.58	-2.16	1.01085		3	16	0	Primary 7		3	0										-0.679649	-0.386175	-0.152294	-0.333121	-1.02838	-0.561823	-0.44273	-0.657555	0.452816	1	Mother	0.289388	0.355866	-0.113864	0.279746	-0.132427	1.0623	-0.295103	0.17419	0.452461	1	Mother
553	2.07529	1	24	-2.58	-2.16	1.01085		3	16	0	Primary 7		3	0										0.808314	0.777827	0.0388325	1.80134	-0.0192295	0.187328	0.404446	-0.60793	1.82254	7	Mother	-0.204079	-0.0875448	0.158318	-0.635176	0.360921	-1.05701	-0.20578	-0.132141	-0.0240332		Mother
554	2.67214	1	0	-0.96	-0.08	-0.312634	SMA	2	13	0	Secondary or higher	0	2		0	1	0	0	0	0	1	1	1	0.763565	0.224444	0.556579	0.540143	0.92033	1.77729	1.72056	1.12169	-0.810903	1	Mother
554	2.67214	1	6	-0.96	-0.08	-0.312634	SMA	2	13	0	Secondary or higher	0	2		0	1	0	0	0	0	1	1	1	-0.414002	-1.03335	-0.125139	0.527174	-0.371004	1.73479	1.66056	1.14718	0.476783	1	Mother
554	2.67214	1	12	-0.96	-0.08	-0.312634	SMA	2	13	0	Secondary or higher	0	2		0	1	0	0	0	0	1	1	1	-0.845076	-0.948919	-0.803724	-0.350091	-0.355451	-1.29898	-1.58857	0.274644	-0.634841	1	Other	-1.87978	-1.26316	-1.88621	-2.276	-1.22483	-1.98401	-2.19092	-0.556395	-1.42053	1	Other
554	2.67214	1	24	-0.96	-0.08	-0.312634	SMA	2	13	0	Secondary or higher	0	2		0	1	0	0	0	0	1	1	1	-1.22503	-0.798334	-0.623042	-1.23784	-0.980916	-1.03705	-1.16607	-0.127864	-0.475371	1	Other	-1.06813	-0.674499	-1.14008	-1.17792	-0.960199	-1.12357	-1.06954	-0.246835	-0.787423	1	Other
555	3.00616	1	0	-2.8	-0.98	2.23314	CM	1	17	0	Secondary or higher	0	3		0	0	1	1	1	0	2	1	1	-0.0639606	0.947348	-0.939496	0.531727	-0.702896	-0.208327	-0.171061	-0.210031	-0.754674	1	Mother	0.771865	0.575418	1.21999	0.39318	1.13741	-0.0406314	0.741851	1.42923	0.117716		Mother
555	3.00616	1	6	-2.8	-0.98	2.23314	CM	1	17	0	Secondary or higher	0	3		0	0	1	1	1	0	2	1	1	-1.12754	-0.993312	-0.856988	-0.343054	-1.01683	-0.622398	-0.798699	0.260814	-0.681852	1	Mother	0.00100654	-0.198209	0.237635	-0.596659	1.25825	0.103373	-1.01618	-0.0138679	-0.223539	1	Mother
555	3.00616	1	12	-2.8	-0.98	2.23314	CM	1	17	0	Secondary or higher	0	3		0	0	1	1	1	0	2	1	1	-0.944268	-0.246905	-0.765081	-0.787137	-1.00272	-1.50807	-1.28003	-1.51301	-0.600734	1	Mother	0.188956	-0.0177559	0.368521	-0.425784	1.39286	0.263784	-0.872394	0.143596	-0.0653722	1	Mother
555	3.00616	1	24	-2.8	-0.98	2.23314	CM	1	17	0	Secondary or higher	0	3		0	0	1	1	1	0	2	1	1	1.16376	0.916662	0.205415	2.21127	0.332946	0.318416	-0.0169713	1.23301	2.57009	7	Mother	0.0813112	0.122574	-0.459892	0.0556143	-0.0353735	1.14154	-0.783888	-0.797414	0.584807	5	Mother
556	4.61875	2	0	-0.21	-0.44	0.672657		3	11	1	Primary 6 or lower		2	0										-0.724438	-0.751508	0.00781481	-0.666824	-0.675865	-1.39395	-1.45242	-0.544535	-0.718375	1	Mother
556	4.61875	2	6	-0.21	-0.44	0.672657		3	11	1	Primary 6 or lower		2	0										3.8043	2.67761	5	0.616307	2.6049	0.717404	0.844939	-0.0701648	-0.63357	2	Mother
556	4.61875	2	12	-0.21	-0.44	0.672657		3	11	1	Primary 6 or lower		2	0										1.25513	1.07621	1.75141	0.172776	0.65876	-0.650557	-0.888645	0.402036	0.644898	7	Mother	0.584678	-0.301658	0.361001	1.74223	-0.0735717	2.77304	0.735238	-0.639348	-0.0910694	1	Mother
556	4.61875	2	24	-0.21	-0.44	0.672657		3	11	1	Primary 6 or lower		2	0																																-0.945778	-0.904518	-1.3324	-0.00709633
557	1.57426	2	0	-0.07	-0.75	0.21676	SMA	2	9	0	Secondary or higher	1	2		0	1	0	0	0	0	0	1	1	-1.22249	-1.57037	-0.572874	0.273768	-1.41821	0.544082	0.30196	1.10238	-1.23089	1	Mother
557	1.57426	2	6	-0.07	-0.75	0.21676	SMA	2	9	0	Secondary or higher	1	2		0	1	0	0	0	0	0	1	1	-1.03687	-1.49073	-0.477311	-0.170797	-0.750341	0.619283	0.656165	0.228347	-1.14655	1	Mother
557	1.57426	2	12	-0.07	-0.75	0.21676	SMA	2	9	0	Secondary or higher	1	2		0	1	0	0	0	0	0	1	1	-1.60716	-1.42588	-1.17939	-0.613017	-1.3916	-0.516986	-0.669079	0.24855	-1.07787	1	Mother	-1.89539	-1.34535	-1.9473	-1.7703	-2.00647	-1.52921	-1.65729	-0.70145	-1.43053	1	Mother
557	1.57426	2	24	-0.07	-0.75	0.21676	SMA	2	9	0	Secondary or higher	1	2		0	1	0	0	0	0	0	1	1	-1.23322	-1.26311	-0.984091	-0.638816	-0.708413	-1.08179	-0.78992	-1.49843	-0.905499	1	Mother	-1.60653	-1.78056	-1.05814	-1.40719	-0.653305	-1.18834	-1.35175	-1.63441	-1.57767	1	Mother
558	3.7755	2	0	-1.39	0.19	-0.367663		3	11	1	Primary 6 or lower		3	0										-0.455783	-0.550651	-0.932915	1.94607	-1.35376	0.994224	0.916342	0.76197	0.340706	1	Other	-1.50188	-1.09531	-1.35188	-1.43907	-1.43205	-1.64411	-1.06201	-1.54673	-0.684195		Other
558	3.7755	2	6	-1.39	0.19	-0.367663		3	11	1	Primary 6 or lower		3	0										-1.38486	-1.1382	-0.834219	-0.658615	-1.33861	0.83239	0.717993	0.787596	-0.773222	1	Mother	-0.692079	-0.316763	-0.478088	-1.3826	0.20647	-1.47185	-1.11729	-0.74385	-0.0310997	2	Mother
558	3.7755	2	12	-1.39	0.19	-0.367663		3	11	1	Primary 6 or lower		3	0										-1.08255	-1.06813	0.0297473	-1.5336	-0.672498	0.539302	0.646679	-0.0894184	-0.699018	1	Mother	1.08268	0.783936	0.985904	1.06018	0.969879	1.40032	0.691665	0.984654	0.596832	1	Mother
558	3.7755	2	24	-1.39	0.19	-0.367663		3	11	1	Primary 6 or lower		3	0										1.03186	0.438608	0.620219	1.4635	0.664693	2.3736	2.05646	2.20976	0.679004	7	Mother	1.60329	1.76242	2.12691	0.162737	2.75754	-0.975126	1.00537	1.96199	1.42517	1	Mother
559	3.4935	2	0	-1.13	-1.04	0.49927		3	7	0	Primary 7		2	0										1.86708	1.74885	-0.20681	1.52123	2.2306	0.712398	0.595655	0.748004	0.293234	2	Mother
559	3.4935	2	6	-1.13	-1.04	0.49927		3	7	0	Primary 7		2	0										-0.17433	-0.507564	-0.881217	0.211476	0.613786	-0.521842	-0.429849	-0.572874	-0.814703	1	Mother
559	3.4935	2	12	-1.13	-1.04	0.49927		3	7	0	Primary 7		2	0										-0.857934	-0.42879	-0.786699	-0.664892	-0.67811	0.151287	0.339818	-0.548332	-0.731281	1	Mother	-0.0974723	-0.22346	0.445025	-0.278043	0.489493	-0.843824	0.215122	-0.345542	-0.110402	1	Mother
559	3.4935	2	24	-1.13	-1.04	0.49927		3	7	0	Primary 7		2	0										-1.23116	-0.939308	-0.595573	-1.55402	-0.648768	-0.41681	-0.339442	-0.498706	-0.562593	1	Mother	-0.701478	-0.783824	-0.260439	-0.684859	-0.084279	-1.05533	-0.32459	-0.651873	-0.747978	1	Mother
560	5.00753	1	0	0.04	-1.01	0.152497	SMA	2	11	0	Primary 6 or lower	0	3		0	1	0	0	1	0	1	1	1	-0.190356	-0.0741231	-0.557766	0.4813	-0.317692	-0.985682	-0.697399	-1.45918	-0.417759	1	Other
560	5.00753	1	6	0.04	-1.01	0.152497	SMA	2	11	0	Primary 6 or lower	0	3		0	1	0	0	1	0	1	1	1	1.97953	2.01364	0.316122	1.33277	1.98295	0.166035	0.626917	-1.43478	-0.334797	7	Other	0.141896	-0.361781	0.553206	0.26144	0.767041	0.244587	0.228016	-0.607742	-0.191164	1	Other
560	5.00753	1	12	0.04	-1.01	0.152497	SMA	2	11	0	Primary 6 or lower	0	3		0	1	0	0	1	0	1	1	1	-0.196727	0.0782034	-0.374996	0.0252149	-0.289633	-0.482605	-0.411994	-0.512882	-0.256445	1	Other	0.15763	0.280332	-0.786839	0.299464	-0.383485	1.76225	-0.891173	0.178138	0.283774	1	Other
560	5.00753	1	24	0.04	-1.01	0.152497	SMA	2	11	0	Primary 6 or lower	0	3		0	1	0	0	1	0	1	1	1																							0.544883	0.473531	1.66042	-0.744394
561	5.71389	2	0	-0.46	-0.49	-1.2346		3	9	1	Primary 6 or lower		2	0										0.402721	0.427292	-0.563196	1.46529	0.00940542	0.446916	0.380368	0.408545	-0.534017	1	Mother
561	5.71389	2	6	-0.46	-0.49	-1.2346		3	9	1	Primary 6 or lower		2	0																																1.42131	1.91964	0.352482	0.718408
561	5.71389	2	12	-0.46	-0.49	-1.2346		3	9	1	Primary 6 or lower		2	0																																0.323335	0.973992	-0.477759	-0.000155937
561	5.71389	2	24	-0.46	-0.49	-1.2346		3	9	1	Primary 6 or lower		2	0																																1.29408	2.21558	-0.437719	0.791623
562	4.25736	2	0	-1.74	-2.65	0.846043	SMA	2	10	1	Primary 7	0	3		1	1	0	0	1	0	0	1	1	-1.26515	-1.14386	-0.451062	-0.657718	-1.33965	-0.60995	-0.81389	0.336411	-0.779214	1	Mother
562	4.25736	2	6	-1.74	-2.65	0.846043	SMA	2	10	1	Primary 7	0	3		1	1	0	0	1	0	0	1	1	-1.5782	-1.73707	-0.7491	-0.669859	-1.32554	-0.298125	-0.462618	0.360275	-0.698096	1	Other	-0.739091	-0.0326852	-0.967899	-1.4784	-0.309136	-1.32329	-1.40348	0.352659	-0.206779	1	Other
562	4.25736	2	12	-1.74	-2.65	0.846043	SMA	2	10	1	Primary 7	0	3		1	1	0	0	1	0	0	1	1	-0.0317343	0.346777	-0.659804	0.182227	-0.00542568	-0.108106	-0.252208	0.383461	-0.619283	1	Mother	0.825265	0.727407	0.870147	0.211934	1.52904	0.467825	-0.00571739	0.505649	0.752303	1	Mother
562	4.25736	2	24	-1.74	-2.65	0.846043	SMA	2	10	1	Primary 7	0	3		1	1	0	0	1	0	0	1	1																							-0.320538	0.039966	-0.0736875	-0.767575
563	1.61259	1	0	-1.36	-3.02	-1.10672	SMA	2	12	0	Secondary or higher	1	2		0	1	0	0	1	0	1	1	1	-0.607381	-1.2836	-0.425405	-0.297043	0.236102	0.899756	1.00335	0.170376	0.211768	1	Mother
563	1.61259	1	6	-1.36	-3.02	-1.10672	SMA	2	12	0	Secondary or higher	1	2		0	1	0	0	1	0	1	1	1	-0.297341	-1.20352	0.450572	0.554147	-0.40235	-0.70113	-0.862293	0.195324	-0.904465	1	Other
563	1.61259	1	12	-1.36	-3.02	-1.10672	SMA	2	12	0	Secondary or higher	1	2		0	1	0	0	1	0	1	1	1	0.12568	-1.80761	1.30932	0.975671	0.262959	-0.0403294	0.0335725	-0.233624	-0.83487	1	Other	1.19402	2.15131	0.357355	0.0972202	0.364059	0.345868	-0.0293312	1.59045	2.21649	1	Other
563	1.61259	1	24	-1.36	-3.02	-1.10672	SMA	2	12	0	Secondary or higher	1	2		0	1	0	0	1	0	1	1	1	-0.992024	-1.31342	-0.839233	-0.3454	-0.360903	-1.68617	-1.47829	-1.53227	-0.666182	1	Other	-0.791732	-0.397255	-1.08134	-0.817701	-1.06341	-0.410725	-0.9884	0.0165509	-0.515148	1	Other
564	3.14031	2	0	-0.21	0.34	2.23314	CM	1	16	1	Secondary or higher	0	3		0	1	0	1	0	0	2	0	0	-0.781966	-0.651622	-0.274174	-0.629573	-0.719156	-0.298611	-0.707294	1.17994	-0.96726	1	Other	-0.533696	0.538069	-1.03558	-1.41027	-0.755791	-1.31047	-1.25154	0.46395	0.557049		Other
564	3.14031	2	6	-0.21	0.34	2.23314	CM	1	16	1	Secondary or higher	0	3		0	1	0	1	0	0	2	0	0	-1.46994	-1.24831	-0.966336	-0.641162	-1.35889	0.369175	0.334461	0.30387	-0.889829	1	Mother	1.08273	1.7629	0.678026	-0.357973	1.50694	-0.0671799	-0.485262	1.88182	1.51343	1	Mother
564	3.14031	2	12	-0.21	0.34	2.23314	CM	1	16	1	Secondary or higher	0	3		0	1	0	1	0	0	2	0	0	-0.426861	0.156586	-0.888006	0.212373	-0.693662	-0.0481845	0.119772	-0.574636	-0.820694	1	Mother	0.745482	1.09802	0.789576	-0.212341	1.19481	-0.475553	0.0566356	1.38224	0.842827	1	Mother
564	3.14031	2	24	-0.21	0.34	2.23314	CM	1	16	1	Secondary or higher	0	3		0	1	0	1	0	0	2	0	0	1.94277	1.67247	0.103378	1.9122	1.95162	1.91449	2.09342	0.379122	1.76804	7	Mother	2.55973	3.03366	2.19061	0.688971	3.21196	0.711203	0.597175	3.01216	2.65653	5	Mother
566	3.53457	2	0	-1.46	-0.64	0.672657	CM	1	9	0	Primary 6 or lower	1	2		0	1	0	1	0	0	2	1	1	-0.23722	0.0808582	-0.198977	-0.639506	-0.0544086	-1.07769	-1.3408	0.300616	-0.90089	1	Mother
566	3.53457	2	6	-1.46	-0.64	0.672657	CM	1	9	0	Primary 6 or lower	1	2		0	1	0	1	0	0	2	1	1	-0.173657	0.163115	-0.490227	-0.220603	-0.0392568	-1.00002	-0.984079	-0.572602	-0.813781	1	Mother	0.208803	0.996448	-0.787943	-0.578857	-0.0742577	0.628292	-1.39886	1.07877	0.856307	1	Mother
566	3.53457	2	12	-1.46	-0.64	0.672657	CM	1	9	0	Primary 6 or lower	1	2		0	1	0	1	0	0	2	1	1	-0.607757	-0.426178	-0.783565	0.630517	-1.00423	-0.325247	-0.212736	-0.547518	-0.728515	1	Mother	0.848522	1.53699	-0.283747	0.235888	0.067234	1.34199	-0.618689	1.24429	1.50581	1	Mother
566	3.53457	2	24	-1.46	-0.64	0.672657	CM	1	9	0	Primary 6 or lower	1	2		0	1	0	1	0	0	2	1	1	0.0119861	0.0684511	0.967866	-0.258682	-0.648207	-0.0546844	-0.197743	0.401087	0.0411527	7	Mother	-0.0307646	0.62679	-0.744055	-0.805089	0.134499	0.0412229	-1.36726	0.305066	0.708049	1	Mother
567	7.01711	1	0	-2.22	-2.56	-0.666655	CM	1	13	0	Primary 7	0	3		1	1	0	1	0	0	2	1	1																							1.17566	1.10155	0.382454	1.10509
567	7.01711	1	6	-2.22	-2.56	-0.666655	CM	1	13	0	Primary 7	0	3		1	1	0	1	0	0	2	1	1																							-0.870214	-1.41188	-0.444505	0.0196232
567	7.01711	1	12	-2.22	-2.56	-0.666655	CM	1	13	0	Primary 7	0	3		1	1	0	1	0	0	2	1	1																							-0.542596	-0.164651	-1.27256	0.0457518
567	7.01711	1	24	-2.22	-2.56	-0.666655	CM	1	13	0	Primary 7	0	3		1	1	0	1	0	0	2	1	1																							-0.362289	0.136341	-0.38171	-0.644234
568	2.08624	1	0	-0.75	0.27	0.21676		3	9	0	Primary 7		3	0										0.319357	0.131307	-0.335064	0.986847	0.249971	0.970847	0.798302	1.09268	0.291503	1	Mother
568	2.08624	1	6	-0.75	0.27	0.21676		3	9	0	Primary 7		3	0										1.86918	1.21479	2.09913	0.110478	1.89749	0.925477	1.29044	-0.68047	3.37752	7	Mother	0.606341	1.00126	0.249279	-0.0113592	0.37859	0.363185	-0.223488	1.60745	0.622748	1	Mother
568	2.08624	1	12	-0.75	0.27	0.21676		3	9	0	Primary 7		3	0										0.684888	0.953006	-0.542762	0.530831	0.931153	-0.322734	-0.165615	-0.657691	-0.748682	1	Mother	1.11737	1.05656	1.47407	0.78688	0.933929	-0.0287828	1.38151	1.12397	0.934807	1	Mother
568	2.08624	1	24	-0.75	0.27	0.21676		3	9	0	Primary 7		3	0										3.16481	2.45104	3.15683	-0.358162	3.57315	1.26384	1.23579	0.73993	0.620122	7	Mother	1.56135	1.89758	1.25594	0.886228	0.998899	0.575518	1.04984	2.08342	1.58409	1	Mother
569	4.11499	1	0	-1.96	-1.47	-1.2346	CM	1	9	0	Primary 6 or lower	1	2		0	1	1	1	1	0	2	0	1	1.31304	1.12361	2.78151	0.503789	-0.343827	-0.999897	-0.695215	-1.50338	0.633027	1	Mother
569	4.11499	1	6	-1.96	-1.47	-1.2346	CM	1	9	0	Primary 6 or lower	1	2		0	1	1	1	1	0	2	0	1	-0.486607	-0.806168	-0.632441	0.491165	-0.329156	-0.565446	-0.202243	-1.47857	-0.483667	1	Other
569	4.11499	1	12	-1.96	-1.47	-1.2346	CM	1	9	0	Primary 6 or lower	1	2		0	1	1	1	1	0	2	0	1	-0.171523	-0.719559	-0.528523	1.34132	-0.313202	0.354579	0.297431	0.346099	-0.391948	1	Other	1.39122	2.31796	1.07202	-0.494081	1.95275	-0.958603	-0.0829629	0.548886	2.91904	1	Other
569	4.11499	1	24	-1.96	-1.47	-1.2346	CM	1	9	0	Primary 6 or lower	1	2		0	1	1	1	1	0	2	0	1
570	1.87269	2	0	-3.29	-2.91	-0.0479372	CM	1	8	0	Primary 6 or lower	0	2		1	0	8	1	0	0	2	1	1	-0.689519	-0.853128	0.263938	0.266249	-1.40948	-0.608624	-0.762508	0.218313	0.0203832	1	Other
570	1.87269	2	6	-3.29	-2.91	-0.0479372	CM	1	8	0	Primary 6 or lower	0	2		1	0	8	1	0	0	2	1	1	-0.382506	-0.776964	1.13522	-0.609705	-0.742244	-0.77621	-0.966723	0.242041	0.10104	1	Other
570	1.87269	2	12	-3.29	-2.91	-0.0479372	CM	1	8	0	Primary 6 or lower	0	2		1	0	8	1	0	0	2	1	1	1.14613	1.61872	0.0269972	-0.617845	1.88003	1.66728	1.58052	1.15689	4.95958	7	Other	1.27447	1.65025	1.64872	0.0760281	1.67528	-0.920327	0.916037	2.5301	1.0486	1	Other
570	1.87269	2	24	-3.29	-2.91	-0.0479372	CM	1	8	0	Primary 6 or lower	0	2		1	0	8	1	0	0	2	1	1	0.154188	1.44528	-0.949104	-0.643438	0.276762	1.58023	1.73596	0.308344	-0.874619	7	Other	2.00228	1.79673	2.41345	1.19838	2.38588	0.507984	1.63848	3.17892	0.898764	1	Other
571	2.23135	2	0	0.04	-1.5	1.27555		3	11	0	Primary 7		3	0										1.46389	1.21331	1.11224	-0.60667	2.19364	1.36121	1.37388	0.685498	0.0807606	1	Mother
571	2.23135	2	6	0.04	-1.5	1.27555		3	11	0	Primary 7		3	0										0.0361431	0.622712	-0.352505	-1.05117	0.575225	0.717497	0.895064	-0.18867	-0.435875	7	Mother	-0.749151	-0.551351	-0.169489	-0.793739	-0.65709	-1.71973	0.093663	0.329748	-0.866407	1	Mother
571	2.23135	2	12	0.04	-1.5	1.27555		3	11	0	Primary 7		3	0										-0.527417	0.0264558	-0.264253	-1.49477	-0.0644296	0.188195	0.410802	-0.615177	0.242535	1	Mother	-0.789755	-1.07979	0.0783966	-0.502634	-0.314411	-1.29315	0.231726	-0.469728	-1.19778	1	Mother
571	2.23135	2	24	0.04	-1.5	1.27555		3	11	0	Primary 7		3	0										-0.528744	0.520215	-0.853541	-0.656062	-0.688371	-0.500062	-0.130111	-1.46453	0.410762	7	Mother	-0.731591	-0.822511	-0.62781	-0.275289	-0.888948	-0.142856	-0.308803	-0.460061	-0.86976	1	Mother
572	6.5024	2	0	-0.22	-0.61	0.0954987	CM	1	11	1	Primary 6 or lower	0	2		0	1	0	1	0	0	2	0	0																							-1.26405	-0.903547	-1.33568	-0.75315
572	6.5024	2	6	-0.22	-0.61	0.0954987	CM	1	11	1	Primary 6 or lower	0	2		0	1	0	1	0	0	2	0	0																							0.0130223	0.343775	0.383114	-0.72743
572	6.5024	2	12	-0.22	-0.61	0.0954987	CM	1	11	1	Primary 6 or lower	0	2		0	1	0	1	0	0	2	0	0																							-0.608411	-0.289486	-0.443845	-0.69994
572	6.5024	2	24	-0.22	-0.61	0.0954987	CM	1	11	1	Primary 6 or lower	0	2		0	1	0	1	0	0	2	0	0																							1.6285	0.325384	0.445252	3.05972
573	2.7269	1	0	-1.64	-2.39	-0.312634	SMA	2	15	0	Primary 6 or lower	0	2		0	1	0	0	0	0	0	1	1	0.273974	0.568052	0.956969	-0.325119	-0.384472	0.348507	0.480039	-0.223861	-0.201166	1	Other
573	2.7269	1	6	-1.64	-2.39	-0.312634	SMA	2	15	0	Primary 6 or lower	0	2		0	1	0	0	0	0	0	1	1	-1.15276	-1.69576	-0.896153	0.526002	-1.02284	-0.413718	-0.552588	0.250645	-0.716419	1	Other	-0.079086	0.426612	-0.551374	-0.542448	-0.293079	0.0350166	-0.867768	0.552815	0.353387	1	Other
573	2.7269	1	12	-1.64	-2.39	-0.312634	SMA	2	15	0	Primary 6 or lower	0	2		0	1	0	0	0	0	0	1	1	-0.966464	-0.945438	-0.799546	0.0812985	-1.00801	0.0215539	-0.0587787	0.275729	-0.631154	1	Other	0.229015	1.20106	-0.536001	-0.743914	-0.151587	-0.341457	-0.926312	1.03522	1.16397	1	Other
573	2.7269	1	24	-1.64	-2.39	-0.312634	SMA	2	15	0	Primary 6 or lower	0	2		0	1	0	0	0	0	0	1	1	-0.469792	-0.449503	0.953453	-0.808108	-0.97835	0.0538498	-0.320062	1.22474	2.54197	7	Other	0.458328	1.46347	-0.138638	-1.14685	0.985093	-0.821861	-1.25308	2.31693	0.852152	5	Other
574	6.65298	2	0	-0.24	-2.04	-0.361793	SMA	2	10	1	Primary 6 or lower	1	3		1	1	0	0	1	0	1	1	1																							-0.31125	-0.591967	-0.480603	0.367291
574	6.65298	2	6	-0.24	-2.04	-0.361793	SMA	2	10	1	Primary 6 or lower	1	3		1	1	0	0	1	0	1	1	1																							0.331642	0.342609	-1.31106	1.50338
574	6.65298	2	12	-0.24	-2.04	-0.361793	SMA	2	10	1	Primary 6 or lower	1	3		1	1	0	0	1	0	1	1	1																							0.0255977	0.0233561	-0.442095	0.415194
574	6.65298	2	24	-0.24	-2.04	-0.361793	SMA	2	10	1	Primary 6 or lower	1	3		1	1	0	0	1	0	1	1	1																							-0.428162	-0.301822	-0.402164	-0.277106
575	2.0616	1	0	2.19	-1.19	-0.577331	SMA	2	12	0	Primary 6 or lower	0	3		0	1	0	0	1	0	1	1	1	-0.179988	-1.88203	0.830074	-0.308356	0.902453	-0.110599	-0.454371	1.09146	-0.913683	1	Mother
575	2.0616	1	6	2.19	-1.19	-0.577331	SMA	2	12	0	Primary 6 or lower	0	3		0	1	0	0	1	0	1	1	1	-0.611733	-0.458856	-0.629447	-0.321601	-0.388561	-0.869949	-1.3453	1.11749	-0.825191	1	Mother
575	2.0616	1	12	2.19	-1.19	-0.577331	SMA	2	12	0	Primary 6 or lower	0	3		0	1	0	0	1	0	1	1	1	0.313995	0.284939	0.239219	0.0986133	0.278271	-1.27909	-1.27407	-0.657149	-0.746839	1	Mother	-1.75239	-0.576683	-2.18913	-2.25787	-2.05095	-2.20548	-1.97008	-0.45691	-0.511334	1	Mother
575	2.0616	1	24	2.19	-1.19	-0.577331	SMA	2	12	0	Primary 6 or lower	0	3		0	1	0	0	1	0	1	1	1	1.42972	1.78385	0.820291	1.80113	-0.0189889	-1.00894	-1.12073	-0.158101	1.82393	7	Mother	-0.753573	-0.786188	-1.06151	-0.632263	-0.490481	0.580986	-1.4614	-0.763241	-0.665664	1	Mother
577	3.50171	1	0	0.18	-1.48	-1.92814	CM	1	13	0	Primary 6 or lower	0	3		0	0	0	1	1	0	2	1	1	-0.127168	0.356315	-0.844978	1.38312	-1.01499	0.225302	-0.0952286	1.16278	0.529786	1	Mother	1.40731	0.994904	1.84341	0.18783	3.19666	0.669422	-0.158674	0.640494	1.08578		Mother
577	3.50171	1	6	0.18	-1.48	-1.92814	CM	1	13	0	Primary 6 or lower	0	3		0	0	0	1	1	0	2	1	1	0.428004	0.432478	0.0262996	0.507169	0.305448	1.13546	1.22699	0.287661	-0.590595	1	Mother	1.64947	1.05738	2.21797	1.50097	1.83653	0.828921	1.87139	1.43085	0.759807	1	Mother
577	3.50171	1	12	0.18	-1.48	-1.92814	CM	1	13	0	Primary 6 or lower	0	3		0	0	0	1	1	0	2	1	1	-0.75898	-0.502599	-0.67004	-0.799692	-0.334928	0.482715	0.73896	-0.58949	0.684186	1	Mother	1.26763	1.68924	1.60372	-0.503136	2.59918	-1.2056	0.115002	0.623319	2.03117	1	Mother
577	3.50171	1	24	0.18	-1.48	-1.92814	CM	1	13	0	Primary 6 or lower	0	3		0	0	0	1	1	0	2	1	1	2.34773	2.00842	1.47969	2.62942	1.00218	2.67585	2.14833	3.05782	2.66227	7	Mother	1.73191	1.84802	1.76634	0.630869	2.25183	0.23365	0.847247	1.91666	1.56995	1	Mother
578	4.6078	1	0	-2.46	-0.93	0.672657		3	9	1	Secondary or higher		2	0										-0.735775	-0.807473	-0.634008	-0.37251	-0.329396	-0.0876795	-0.2035	0.31871	-0.485049	1	Mother
578	4.6078	1	6	-2.46	-0.93	0.672657		3	9	1	Secondary or higher		2	0										1.05952	0.272532	3.35579	0.0474966	-0.315527	-0.0165879	-0.131019	0.342167	0.795723	2	Mother	-0.905809	-0.518652	-0.904838	-1.41142	-0.203673	-1.25758	-1.36472	-0.110844	-0.650825	1	Mother
578	4.6078	1	12	-2.46	-0.93	0.672657		3	9	1	Secondary or higher		2	0										-0.616048	-0.652535	-0.448104	0.466814	-0.954059	-1.13889	-1.71955	1.26582	-0.32097	1	Mother	-0.986733	-0.564928	-1.01316	-1.36078	-0.49056	-1.36333	-1.21522	-0.580902	-0.486367	1	Mother
578	4.6078	1	24	-2.46	-0.93	0.672657		3	9	1	Secondary or higher		2	0																																-0.257895	0.793302	-0.908417	-0.771339
580	2.69678	1	0	-2.52	-2.63	-1.63612	CM	1	6	0	Not known	0	3		1	0	0	1	0	0	2	1	1	0.0221158	0.228361	-0.998505	0.539522	0.267849	0.822986	0.614197	1.12291	0.394283	1	Other	-0.122584	-0.943878	0.402719	0.664549	-0.0161352	0.946551	0.439858	-0.256326	-1.11141		Other
580	2.69678	1	6	-2.52	-2.63	-1.63612	CM	1	6	0	Not known	0	3		1	0	0	1	0	0	2	1	1	-0.794648	-1.04423	-0.138194	0.0969578	-1.02621	-1.26923	-1.54155	0.24495	-0.735777	1	Other	-1.45041	-1.13684	-1.19364	-1.72646	-0.75205	-1.63852	-1.53111	-0.75233	-1.13409	1	Other
580	2.69678	1	12	-2.52	-2.63	-1.63612	CM	1	6	0	Not known	0	3		1	0	0	1	0	0	2	1	1	0.626725	-0.301307	0.729428	-0.346573	1.60007	-0.60144	-0.499798	-0.631116	-0.658346	1	Other	0.110739	0.0879874	0.642179	-0.547144	1.08383	-0.940318	-0.135799	0.0317606	0.144457	1	Other
580	2.69678	1	24	-2.52	-2.63	-1.63612	CM	1	6	0	Not known	0	3		1	0	0	1	0	0	2	1	1	2.11435	2.20188	0.530086	1.35601	1.95593	1.5843	1.73463	0.317219	3.71351	7	Other	1.93754	1.16394	2.86891	1.07749	3.49723	0.482525	1.42045	-0.909249	2.08329	5	Other
581	2.57906	1	0	0.72	-2.54	-0.0479372	SMA	2	7	0	Secondary or higher	0	3		1	1	0	0	1	0	0	1	1	-0.736822	0.209646	-1.02096	-0.321394	-1.042	-0.152682	-0.23642	0.218239	0.374464	1	Mother	-0.334313	0.0646114	-0.606905	-0.901515	-0.0490223	-0.182813	-1.27269	-1.87926	1.10509		Mother
581	2.57906	1	6	0.72	-2.54	-0.0479372	SMA	2	7	0	Secondary or higher	0	3		1	1	0	0	1	0	0	1	1	-1.18	-0.391398	-0.938452	-1.19618	-1.02934	0.151745	0.523611	-1.1086	-0.753752	1	Mother	-0.828823	-0.942922	-0.489405	-0.748116	-0.355029	-0.583896	-0.724262	-1.10411	-0.685896	1	Mother
581	2.57906	1	12	0.72	-2.54	-0.0479372	SMA	2	7	0	Secondary or higher	0	3		1	1	0	0	1	0	0	1	1	-0.252592	0.354574	-0.45712	-0.344365	-0.362105	0.463158	0.458163	0.26339	-0.673095	1	Mother	-1.0841	-0.646541	-0.725881	-1.84848	-0.00776168	-2.05966	-1.42001	-0.630653	-0.528628	2	Mother
581	2.57906	1	24	0.72	-2.54	-0.0479372	SMA	2	7	0	Secondary or higher	0	3		1	1	0	0	1	0	0	1	1	-0.626157	-0.156379	-0.656463	0.0623971	-0.986047	0.13415	0.611086	-1.48481	-0.504868	7	Mother	-0.860126	-0.623165	-0.943265	-1.11302	-0.368875	-0.636814	-1.3315	-0.620987	-0.522775	1	Mother
582	2.1191	2	0	-1.9	-1.64	-0.312634	CM	1	13	0	Primary 6 or lower	0	3		0	1	0	1	1		2	1	1	0.0852253	-0.14415	0.310936	-0.603842	0.557347	1.22461	1.07917	1.12936	-1.13917	1	Mother	1.72093	2.14383	1.25335	0.895151	1.09317	1.075	0.750198	1.3978	2.31591		Mother
582	2.1191	2	6	-1.9	-1.64	-0.312634	CM	1	13	0	Primary 6 or lower	0	3		0	1	0	1	1		2	1	1	-0.0986983	-0.061023	-0.369215	0.246865	-0.0805434	-0.133902	-0.228478	0.256414	-1.05114	1	Mother	0.487882	1.40404	0.173331	-0.697781	0.385556	-0.931264	-0.351835	1.56869	1.1989	1	Mother
582	2.1191	2	12	-1.9	-1.64	-0.312634	CM	1	13	0	Primary 6 or lower	0	3		0	1	0	1	1		2	1	1	-1.29207	-0.669465	-1.07548	-0.626744	-1.37565	-1.15371	-1.14077	-0.623313	-0.986156	1	Other	-0.245861	-1.25826	0.278188	0.96343	-0.360301	1.37759	0.602066	-0.840301	-1.2517	1	Other
582	2.1191	2	24	-1.9	-1.64	-0.312634	CM	1	13	0	Primary 6 or lower	0	3		0	1	0	1	1		2	1	1	3.17346	2.50353	2.23469	4.53137	0.613225	1.87028	1.50995	2.12271	1.58415	7	Mother	1.4704	0.98722	1.77168	1.06375	2.0531	1.16518	0.90025	0.120042	1.33146	5	Mother
583	4.62149	1	0	-0.93	0.11	-0.887823	SMA	2	8	0	Primary 6 or lower	1	3		0	1	0	0	0	0	0	1	1	-0.982252	-0.805297	-0.631397	-0.372855	-0.982199	-1.40287	-1.45031	-0.579456	-0.482745	1	Other	-0.0350897	-0.106138	0.314488	-0.304265	0.521533	-0.593066	-0.0342223	0.0557418	-0.157475		Other
583	4.62149	1	6	-0.93	0.11	-0.887823	SMA	2	8	0	Primary 6 or lower	1	3		0	1	0	0	0	0	0	1	1	-0.414973	-0.0436578	-0.521212	-0.387411	-0.31208	0.719581	0.997132	-0.550847	3.21762	7	Other	0.0244276	0.110201	0.104785	-0.353462	0.469486	-0.400756	-0.281204	0.244519	0.0321452	1	Other
583	4.62149	1	12	-0.93	0.11	-0.887823	SMA	2	8	0	Primary 6 or lower	1	3		0	1	0	0	0	0	0	1	1	-0.974161	-0.634256	-0.426172	-0.831907	-0.950692	-0.642627	-0.59182	-0.52617	0.298906	1	Other	-1.21823	-0.989678	-1.10413	-0.811894	-1.52556	-1.32505	-0.342199	-1.17711	-0.770786	2	Other
583	4.62149	1	24	-0.93	0.11	-0.887823	SMA	2	8	0	Primary 6 or lower	1	3		0	1	0	0	0	0	0	1	1																							-0.888616	-0.774826	-0.479403	-0.76576
584	3.68241	1	0	-2.45	-0.85	-0.02089		3	12	0	Secondary or higher		2	0										-0.104971	-0.284769	0.749271	-0.349194	-0.356493	-0.106826	0.07119	-0.625963	-0.640832	1	Mother
584	3.68241	1	6	-2.45	-0.85	-0.02089		3	12	0	Secondary or higher		2	0										-0.538062	-0.872756	0.0675536	-0.362163	-0.341422	-0.14932	-0.543879	1.19722	-0.554184	1	Mother	0.0757354	0.319706	-0.534014	-0.200698	-0.0238623	0.900924	-0.999561	0.233958	0.347557	1	Mother
584	3.68241	1	12	-2.45	-0.85	-0.02089		3	12	0	Secondary or higher		2	0										-0.478199	-0.125479	-0.619386	-0.374442	-0.327152	0.163326	0.0857645	0.322507	0.728893	1	Mother	-0.618496	-0.667321	-0.646053	-0.663014	-0.101148	-0.0270169	-1.06382	-0.240573	-0.781133	1	Mother
584	3.68241	1	24	-2.45	-0.85	-0.02089		3	12	0	Secondary or higher		2	0										0.636853	1.03765	1.52042	-1.26343	0.355232	-0.525342	-0.733101	0.371861	-0.304378	7	Mother	-0.671939	-0.411064	-0.986386	-0.817719	-0.463026	-0.240346	-1.18581	-0.231801	-0.454015	1	Mother
585	5.40452	1	0	-2.15	-1.67	1.71298		3	7	1	Secondary or higher		2	1										0.726965	0.658792	-0.482047	0.0393565	1.65354	0.870151	1.02855	-0.0912555	3.25218	1	Mother
585	5.40452	1	6	-2.15	-1.67	1.71298		3	7	1	Secondary or higher		2	1										-0.575691	-0.600309	-0.38544	-1.26923	0.361967	0.586924	0.828529	-0.515594	0.935375	1	Mother
585	5.40452	1	12	-2.15	-1.67	1.71298		3	7	1	Secondary or higher		2	1																																3.37866	1.73545	3.32987	2.92981
585	5.40452	1	24	-2.15	-1.67	1.71298		3	7	1	Secondary or higher		2	1																																-0.873676	-0.156492	-1.30013	-0.730513
586	3.46064	2	0	0.09	-1.39	0.672657		3	14	1	Primary 7		2	0										-0.494459	-0.265797	-0.603023	0.226239	-0.709776	-0.609782	-0.519508	-0.60189	-0.312816	1	Mother
586	3.46064	2	6	0.09	-1.39	0.672657		3	14	1	Primary 7		2	0										-0.557666	-0.85683	-0.89845	0.213753	-0.0420627	0.662096	0.66646	0.321497	-0.829912	1	Other	0.116156	0.258844	0.0414688	0.0222944	-0.101026	0.0513051	0.0402969	0.730564	0.0194449	1	Other
586	3.46064	2	12	0.09	-1.39	0.672657		3	14	1	Primary 7		2	0										-0.12052	-0.103025	0.762119	-0.663444	-0.353192	-0.935091	-0.917883	-0.551179	1.0606	7	Mother	-0.340977	-0.361944	0.184997	-0.425458	0.0465839	-1.13551	0.197967	0.269454	-0.61252	1	Mother
586	3.46064	2	24	0.09	-1.39	0.672657		3	14	1	Primary 7		2	0										-0.616146	-0.276463	-0.213982	-0.257095	-0.976652	-0.782635	-0.762446	-0.500876	-0.569967	7	Mother	-0.497485	-0.332417	-0.272337	-0.573366	-0.30994	-1.06991	-0.127983	-0.0324041	-0.440193	1	Mother
587	4.07392	1	0	-3.6	-0.89	-0.887823	CM	1	7	0	Primary 6 or lower	1	3		1	1	2	1		0	2	1	1	-0.801355	-0.892341	0.0440545	-0.359059	-0.998232	-1.60481	-1.39533	-1.50542	-0.574924	1	Other	0.0276796	1.4431	-0.567479	-1.2606	-0.485127	-1.86552	-0.616967	0.827482	1.59577		Other
587	4.07392	1	6	-3.6	-0.89	-0.887823	CM	1	7	0	Primary 6 or lower	1	3		1	1	2	1		0	2	1	1	-0.625148	-1.49469	0.124996	0.0621901	-0.332603	-0.822616	-0.497793	-1.4844	0.0970335	1	Other	-0.691113	0.0816299	-1.06324	-1.23714	-0.793428	-1.17917	-1.11938	0.649265	-0.197915	1	Other
587	4.07392	1	12	-3.6	-0.89	-0.887823	CM	1	7	0	Primary 6 or lower	1	3		1	1	2	1		0	2	1	1	-1.31312	-1.08667	-0.567166	-1.24522	-0.972338	-0.993079	-0.70494	-1.46162	-0.426055	1	Other	-0.677516	0.136928	-1.18271	-1.32808	-0.664939	-1.02605	-1.40149	-0.151105	0.275225	1	Other
587	4.07392	1	24	-3.6	-0.89	-0.887823	CM	1	7	0	Primary 6 or lower	1	3		1	1	2	1		0	2	1	1																							2.10562	1.42595	1.61874	1.80066
588	1.64819	2	0	0	-0.86	1.01085	CM	1	8	0	Primary 6 or lower	1	3		1	0	2	1	1	0	2	1	1	-1.70973	-1.55862	-1.33867	-0.591977	-1.41605	-1.36082	-1.62946	0.207195	-1.21845	1	Other
588	1.64819	2	6	0	-0.86	1.01085	CM	1	8	0	Primary 6 or lower	1	3		1	0	2	1	1	0	2	1	1	0.701923	0.185967	-1.25459	1.55662	1.53627	0.381838	0.380726	0.229025	-0.543725	2	Mother	-0.72269	-0.674319	-0.343507	-0.258767	-1.26291	-0.842828	0.321855	0.120393	-0.915615	1	Mother
588	1.64819	2	12	0	-0.86	1.01085	CM	1	8	0	Primary 6 or lower	1	3		1	0	2	1	1	0	2	1	1	-0.358292	1.2638	-1.16686	-1.47855	-0.0832691	0.810125	0.867412	0.251804	0.134225	7	Other	0.727922	0.55051	0.636869	0.539473	0.786401	1.21809	0.039745	-0.363085	1.00726	1	Other
588	1.64819	2	24	0	-0.86	1.01085	CM	1	8	0	Primary 6 or lower	1	3		1	0	2	1	1	0	2	1	1	-0.359281	-0.586339	0.194102	0.655903	-1.03373	-1.31472	-1.33828	-0.597415	1.50395	7	Other	-1.53418	-1.41329	-1.77947	-1.13761	-1.49476	-0.0835853	-1.75804	-0.986309	-1.40221	1	Other
589	4.1013	2	0	1.14	-0.19	0.846043		3	8	1	Primary 6 or lower		3	0										-0.0435243	0.170949	-0.870773	0.642038	-0.0378137	0.923375	1.24373	-0.570162	-0.204966	1	Mother
589	4.1013	2	6	1.14	-0.19	0.846043		3	8	1	Primary 6 or lower		3	0										0.266852	0.586368	-0.774166	1.06122	-0.0229825	0.0413993	0.211106	-0.545078	-0.720219	1	Mother	-0.403461	-1.25143	-0.0259498	0.634443	-0.345847	1.08585	0.234729	-1.27475	-1.05532	1	Mother
589	4.1013	2	12	1.14	-0.19	0.846043		3	8	1	Primary 6 or lower		3	0										-0.420788	-0.344792	-0.685914	0.185676	-0.336036	-0.368152	-0.273156	-0.522163	-0.642328	1	Mother
589	4.1013	2	24	1.14	-0.19	0.846043		3	8	1	Primary 6 or lower		3	0																																2.20886	3.48858	-0.0792668	1.08041
590	1.60986	2	0	-1.13	-0.79	1.01085	SMA	2	9	0	Secondary or higher	0	3		0	1	0	0	0	0	0	1	1	-1.21812	-2.23453	1.38364	-1.02295	-1.41717	0.429675	0.16864	1.10414	1.77769	2	Mother	-0.799033	-0.502887	-0.229237	-1.69893	0.524067	-1.81996	-1.28886	-0.986853	-0.106392		Mother
590	1.60986	2	6	-1.13	-0.79	1.01085	SMA	2	9	0	Secondary or higher	0	3		0	1	0	0	0	0	0	1	1	-0.91649	-0.490805	-1.26295	-0.170038	-0.751223	-1.54073	-1.56871	-0.671989	-1.15162	1	Other	-2.06625	-1.50939	-2.06628	-2.1797	-1.70199	-1.67504	-2.20735	-1.47838	-1.25216	2	Other
590	1.60986	2	12	-1.13	-0.79	1.01085	SMA	2	9	0	Secondary or higher	0	3		0	1	0	0	0	0	0	1	1	-1.35799	-2.09438	0.381956	-1.47711	-0.738156	-1.47375	-1.36166	-1.09931	-0.475973	1	Mother	-0.676248	-0.523599	-0.478599	-1.00523	-0.083357	-0.708849	-1.0258	0.568803	-0.944591	1	Mother
590	1.60986	2	24	-1.13	-0.79	1.01085	SMA	2	9	0	Secondary or higher	0	3		0	1	0	0	0	0	0	1	1	-0.118521	0.408799	0.182613	-0.206461	-0.708894	-0.964511	-0.9312	-0.600398	0.893292	7	Mother	-1.66821	-1.78671	-1.0626	-1.03194	-1.51159	-1.46635	-0.51794	-1.95667	-1.42198	5	Mother
591	4.52019	1	0	0.43	0.15	0.672657	SMA	2	12	1	Secondary or higher	0	3		0	1	0	0	1	0	0	1	1	-0.250219	-0.151592	-0.650718	0.493579	-0.331962	0.13867	0.33816	-0.584473	0.70124	1	Other	1.91511	2.07803	1.14241	1.56521	0.920083	2.09864	0.983941	2.55778	1.58117		Other
591	4.52019	1	6	0.43	0.15	0.672657	SMA	2	12	1	Secondary or higher	0	3		0	1	0	0	1	0	0	1	1	-0.805036	-0.736533	-0.548889	0.0481865	-0.969532	-0.379947	-0.273976	-0.558033	-0.409923	1	Mother	-1.69027	-1.23062	-1.76771	-1.80221	-1.27844	-1.53923	-1.79225	-1.38736	-0.981975	2	Mother
591	4.52019	1	12	0.43	0.15	0.672657	SMA	2	12	1	Secondary or higher	0	3		0	1	0	0	1	0	0	1	1	-0.384032	-0.673426	-0.47317	0.470125	-0.304705	-0.440111	-0.351993	-0.538373	-0.343093	1	Other	0.177944	-0.146331	0.173202	0.625044	-0.100423	0.773268	0.422989	-0.306954	-0.0462585	1	Other
591	4.52019	1	24	0.43	0.15	0.672657	SMA	2	12	1	Secondary or higher	0	3		0	1	0	0	1	0	0	1	1																							0.847236	1.10822	0.359918	0.335086
592	11.4415	2	0	-1.29	-1.66	0.247929		3	12	1	Secondary or higher		2	1																																-0.526902	-0.961956	-0.289265	0.234321
592	11.4415	2	6	-1.29	-1.66	0.247929		3	12	1	Secondary or higher		2	1																																-0.516057	-0.341323	-0.268698	-0.482066
592	11.4415	2	12	-1.29	-1.66	0.247929		3	12	1	Secondary or higher		2	1																																-0.664061	-0.347086	-0.673754	-0.457843
592	11.4415	2	24	-1.29	-1.66	0.247929		3	12	1	Secondary or higher		2	1																																0.939651	1.52129	1.06418	-0.408307
593	10.7953	1	0	-1.73	-1.59	1.01008	SMA	2	14	1	Primary 7	0	3		0	0	0	0	0	0	0	1	1																							-0.0109045	-0.823296	1.80701	-0.562038
593	10.7953	1	6	-1.73	-1.59	1.01008	SMA	2	14	1	Primary 7	0	3		0	0	0	0	0	0	0	1	1																							1.26525	0.424543	0.55235	2.0584
593	10.7953	1	12	-1.73	-1.59	1.01008	SMA	2	14	1	Primary 7	0	3		0	0	0	0	0	0	0	1	1																							0.484503	0.418586	0.572479	0.228516
593	10.7953	1	24	-1.73	-1.59	1.01008	SMA	2	14	1	Primary 7	0	3		0	0	0	0	0	0	0	1	1																							1.61363	1.66011	0.188209	1.76254
594	10.8364	1	0	0.56	-0.17	0.0954987		3	6	1	Secondary or higher		2	0																																1.09786	0.429659	0.959594	1.29493
594	10.8364	1	6	0.56	-0.17	0.0954987		3	6	1	Secondary or higher		2	0																																0.791874	-0.202987	1.40414	0.948849
594	10.8364	1	12	0.56	-0.17	0.0954987		3	6	1	Secondary or higher		2	0																																1.11903	0.731136	0.575214	1.34487
594	10.8364	1	24	0.56	-0.17	0.0954987		3	6	1	Secondary or higher		2	0																																1.61507	1.03258	0.615473	2.13693
595	4.25188	1	0	-0.97	-1.05	1.53959	CM	1	13	1	Secondary or higher	0	3		0	1	0	1	0	0	2	0	0	-0.407257	0.140661	-0.701894	0.50034	-0.993021	-1.0991	-1.09057	-0.597761	0.656072	1	Mother	-1.50573	-0.595413	-1.8634	-1.83262	-1.71596	-1.80628	-1.61226	-1.33261	-0.117714		Mother
595	4.25188	1	6	-0.97	-1.05	1.53959	CM	1	13	1	Secondary or higher	0	3		0	1	0	1	0	0	2	0	0	-0.976871	-0.798334	-0.623042	-0.373959	-0.980916	-1.51605	-1.58237	-0.577287	-0.475371	1	Mother	-1.51029	-1.37622	-1.5067	-1.30494	-1.17362	-0.851027	-1.4889	-1.5144	-1.10959	5	Mother
595	4.25188	1	12	-0.97	-1.05	1.53959	CM	1	13	1	Secondary or higher	0	3		0	1	0	1	0	0	2	0	0	-0.672548	-0.725652	-0.535834	0.478403	-0.967528	-1.44742	-1.5124	-0.554643	-0.398401	1	Mother	-1.0556	-0.737179	-1.38251	-1.01578	-1.0459	-0.426276	-1.35247	-0.731208	-0.637344	1	Mother
595	4.25188	1	24	-0.97	-1.05	1.53959	CM	1	13	1	Secondary or higher	0	3		0	1	0	1	0	0	2	0	0																							-0.583495	0.485025	-1.35012	-0.792705
596	7.09103	1	0	-1.61	-0.67	0.247929	SMA	2	7	1	Secondary or higher	0	2		0	1	0	0	1	0	1	1	1																							-0.563766	-1.40621	-0.0391208	0.366794
596	7.09103	1	6	-1.61	-0.67	0.247929	SMA	2	7	1	Secondary or higher	0	2		0	1	0	0	1	0	1	1	1
596	7.09103	1	12	-1.61	-0.67	0.247929	SMA	2	7	1	Secondary or higher	0	2		0	1	0	0	1	0	1	1	1
596	7.09103	1	24	-1.61	-0.67	0.247929	SMA	2	7	1	Secondary or higher	0	2		0	1	0	0	1	0	1	1	1
597	7.44969	1	0	-1.56	-1.18	0.857652		3	7	1	Secondary or higher		2	1																																0.868233	-0.15701	-0.449318	2.61053
597	7.44969	1	6	-1.56	-1.18	0.857652		3	7	1	Secondary or higher		2	1																																1.82853	0.463721	1.26904	2.63571
597	7.44969	1	12	-1.56	-1.18	0.857652		3	7	1	Secondary or higher		2	1																																3.1052	1.71127	2.138	3.40245
597	7.44969	1	24	-1.56	-1.18	0.857652		3	7	1	Secondary or higher		2	1																																-0.672313	-0.807398	-0.369348	-0.257871
598	5.91376	1	0	-1.36	-1.13	1.19282		3	8	1	Secondary or higher		2	1										0.789519	1.07465	0.394974	0.458467	0.362047	-0.131164	-0.281188	0.383386	-0.265202	1	Mother
598	5.91376	1	6	-1.36	-1.13	1.19282		3	8	1	Secondary or higher		2	1																																0.372133	-0.771783	0.359371	1.44736
598	5.91376	1	12	-1.36	-1.13	1.19282		3	8	1	Secondary or higher		2	1																																1.17451	0.788834	2.92744	-0.752559
598	5.91376	1	24	-1.36	-1.13	1.19282		3	8	1	Secondary or higher		2	1																																-0.0703199	0.463494	-0.428314	-0.331222
599	7.21424	2	0	-2.06	0.63	0.705221	CM	1	7	1	Secondary or higher	0	2		0	1	1	1	0	0	2	0	1																							1.91638	1.90828	2.51353	0.0242036
599	7.21424	2	6	-2.06	0.63	0.705221	CM	1	7	1	Secondary or higher	0	2		0	1	1	1	0	0	2	0	1																							-0.446736	0.335324	-0.86192	-0.691911
599	7.21424	2	12	-2.06	0.63	0.705221	CM	1	7	1	Secondary or higher	0	2		0	1	1	1	0	0	2	0	1																							-0.75255	-0.924139	-0.417043	-0.295614
599	7.21424	2	24	-2.06	0.63	0.705221	CM	1	7	1	Secondary or higher	0	2		0	1	1	1	0	0	2	0	1																							2.59226	2.19761	2.17017	1.60912
600	5.06229	1	0	0.42	-1.75	1.3662	SMA	2	7	1	Primary 7	0	2		0	1	0	0	0	0	0	1	1	-0.18363	-0.735227	0.232569	-0.383962	0.337114	-0.618214	-0.827787	0.341218	-0.408541	1	Other
600	5.06229	1	6	0.42	-1.75	1.3662	SMA	2	7	1	Primary 7	0	2		0	1	0	0	0	0	0	1	1	0.12372	0.0111797	-0.455415	0.46778	0.351224	0.891109	0.772387	0.814504	-0.327423	1	Other
600	5.06229	1	12	0.42	-1.75	1.3662	SMA	2	7	1	Primary 7	0	2		0	1	0	0	0	0	0	1	1																							-0.90246	-0.767055	-1.35472	-0.0564491
600	5.06229	1	24	0.42	-1.75	1.3662	SMA	2	7	1	Primary 7	0	2		0	1	0	0	0	0	0	1	1																							0.0683962	0.16111	0.383658	-0.377355
661	3.59206	2	0	2.29	-0.1	0.49927	CM	1	14	1	Secondary or higher	0	4		0	0	0	1	0	0	2	0	0	-0.726475	-0.57981	-0.967903	-0.640955	-0.052725	-0.829556	-0.776932	-0.595381	-0.891212	1	Other	1.24533	0.94115	1.04241	1.54451	0.437525	1.83789	1.18971	1.87914	0.383166		Other
661	3.59206	2	6	2.29	-0.1	0.49927	CM	1	14	1	Secondary or higher	0	4		0	0	0	1	0	0	2	0	0	2.80828	2.17776	0.685877	3.66604	1.92131	-0.875338	-1.39535	1.22671	2.79486	7	Other	-0.165271	-0.0438266	-0.534607	0.321978	-1.1322	0.639229	0.0786929	1.08951	-0.582645	1	Other
661	3.59206	2	12	2.29	-0.1	0.49927	CM	1	14	1	Secondary or higher	0	4		0	0	0	1	0	0	2	0	0	0.631355	1.24617	-0.396231	1.0628	-0.0248265	-0.806301	-0.908665	-0.098774	-0.73082	7	Other	-0.925451	-0.690247	-1.14291	-0.404098	-1.64398	-0.297826	-0.413095	-0.66154	-0.592749	5	Other
661	3.59206	2	24	2.29	-0.1	0.49927	CM	1	14	1	Secondary or higher	0	4		0	0	0	1	0	0	2	0	0	0.503595	1.06707	-0.209282	1.03811	-0.322728	-0.898686	-1.17498	0.399189	-0.565819	7	Other	-0.487874	-0.323189	-0.38785	-0.818681	0.123791	-0.789167	-0.749665	-0.975028	0.0511403	1	Other
662	2.28063	2	0	-1.35	-1.97	2.06964		3	15	0	Primary 6 or lower		3	0										0.725464	0.216432	0.731692	0.687912	0.562077	2.44635	2.21402	2.03621	3.09165	2	Mother	1.01016	0.683936	0.930607	1.46054	0.0711761	1.67386	1.21775	0.18302	0.919192		Mother
662	2.28063	2	6	-1.35	-1.97	2.06964		3	15	0	Primary 6 or lower		3	0										0.166276	0.630546	-1.123	0.675357	0.250066	1.08414	0.902606	1.16204	1.37398	1	Mother	0.430737	0.519682	0.943748	-0.141131	0.850646	-0.885693	0.527724	0.979636	0.277342	1	Mother
662	2.28063	2	12	-1.35	-1.97	2.06964		3	15	0	Primary 6 or lower		3	0										-1.14243	-0.636389	-1.03579	-1.06393	-0.71635	0.0750206	0.278738	-0.613008	-0.951128	1	Mother	0.387997	0.690908	0.579118	0.0210055	0.124674	-0.733485	0.664154	0.495264	0.749584	1	Mother
662	2.28063	2	24	-1.35	-1.97	2.06964		3	15	0	Primary 6 or lower		3	0										-0.647442	-0.477534	0.324652	-0.657166	-1.01369	1.42251	1.26426	1.23417	-0.182382	1	Mother	0.390891	0.480377	0.728351	-0.767861	1.8978	-0.67336	-0.715088	0.188038	0.594355	1	Mother
663	3.1102	1	0	-2.29	-1.14	-0.194277		3	15	0	Secondary or higher		3	0										-0.17526	-1.04554	-0.919653	0.529106	0.933157	-0.0729611	0.122393	-0.654301	-0.73716	1	Mother	-0.51403	0.497426	-0.82925	-1.47532	-0.54092	-1.64126	-1.11421	-0.12123	0.796192		Mother
663	3.1102	1	6	-2.29	-1.14	-0.194277		3	15	0	Secondary or higher		3	0										-0.852138	-0.958059	-0.81469	-1.21252	0.296068	-0.349613	0.0678383	-1.52589	-0.64452	1	Mother	0.695474	1.99	-0.313156	-1.28018	1.10678	-0.367888	-1.78872	1.32617	2.1044	1	Mother
663	3.1102	1	12	-2.29	-1.14	-0.194277		3	15	0	Secondary or higher		3	0										-0.801355	-1.56215	-0.735837	-0.359059	0.308174	-0.287562	0.131102	-1.50542	-0.574924	1	Mother	0.0276796	-0.194245	0.410166	-0.625467	1.43569	-0.230264	-0.826645	-0.440086	-0.0150464	1	Mother
663	3.1102	1	24	-2.29	-1.14	-0.194277		3	15	0	Secondary or higher		3	0										-0.554859	-0.733921	0.234136	-0.81611	-0.315848	0.341018	0.00607169	1.24047	1.99492	7	Mother	0.582204	1.46545	0.192038	-1.28828	1.71408	-0.98868	-1.36799	0.202469	1.92289	1	Mother
664	6.09446	1	0	-0.8	-1.19	-0.209363	SMA	2	9	1	Primary 6 or lower	1	4		0	1	0	0	0	0	0	1	1																							-1.21785	-0.767703	-1.35253	-0.795699
664	6.09446	1	6	-0.8	-1.19	-0.209363	SMA	2	9	1	Primary 6 or lower	1	4		0	1	0	0	0	0	0	1	1																							0.850351	0.793108	-0.483232	1.45539
664	6.09446	1	12	-0.8	-1.19	-0.209363	SMA	2	9	1	Primary 6 or lower	1	4		0	1	0	0	0	0	0	1	1																							4.18455	2.98074	3.78197	2.9641
664	6.09446	1	24	-0.8	-1.19	-0.209363	SMA	2	9	1	Primary 6 or lower	1	4		0	1	0	0	0	0	0	1	1																							-0.8596	-1.10447	-0.848904	0.0446631
665	2.2204	1	0	-0.08	-0.61	-1.63612	CM	1	8	0	Secondary or higher	0	4		0	0	0	1	0	0	2	1	1	-1.02904	-1.18698	-0.309476	-1.17624	-0.399303	-0.446014	-0.291304	-0.698368	-0.886951	1	Mother	1.46023	1.68459	1.49538	0.749669	1.13133	0.242877	1.13642	1.48935	1.6317		Mother
665	2.2204	1	6	-0.08	-0.61	-1.63612	CM	1	8	0	Secondary or higher	0	4		0	0	0	1	0	0	2	1	1	3.24952	2.23953	2.90304	1.40313	2.88098	1.54313	1.72601	0.224612	2.7982	7	Mother	1.98194	2.101	1.87216	0.160327	3.40171	0.950197	-0.395586	2.28239	1.79166	5	Mother
665	2.2204	1	12	-0.08	-0.61	-1.63612	CM	1	8	0	Secondary or higher	0	4		0	0	0	1	0	0	2	1	1
665	2.2204	1	24	-0.08	-0.61	-1.63612	CM	1	8	0	Secondary or higher	0	4		0	0	0	1	0	0	2	1	1
666	2.17112	1	0	-2.33	-2.22	-2.43021	SMA	2	6	0	Secondary or higher	0	3		0	1	0	0	0	1	1	1	1	-0.786932	-1.19482	-1.09877	-0.311115	0.252457	0.0255879	-0.298846	1.09688	-0.895247	1	Mother	1.33047	2.71872	0.870963	-1.30023	2.18468	-1.40879	-0.975063	1.79014	2.90417		Mother
666	2.17112	1	6	-2.33	-2.22	-2.43021	SMA	2	6	0	Secondary or higher	0	3		0	1	0	0	0	1	1	1	1	-0.357185	-1.1204	-0.619525	-0.322911	0.919368	0.814357	0.605399	1.12007	0.384604	1	Mother	1.45781	2.77709	0.387101	-0.117997	0.608076	0.109781	-0.206332	1.94313	2.89676	1	Mother
666	2.17112	1	12	-2.33	-2.22	-2.43021	SMA	2	6	0	Secondary or higher	0	3		0	1	0	0	0	1	1	1	1	-0.399877	-0.345264	-0.883098	-0.339605	0.285566	-0.523195	-0.403347	-0.64481	-0.704897	1	Mother	0.776659	0.452244	1.05589	1.13317	0.15289	0.602889	1.45911	1.84275	-0.268473	1	Mother
666	2.17112	1	24	-2.33	-2.22	-2.43021	SMA	2	6	0	Secondary or higher	0	3		0	1	0	0	0	1	1	1	1	-0.649362	0.483399	-0.692495	-1.22867	-0.664977	0.465045	0.720944	-0.59532	-0.53667	7	Mother	0.282125	1.06039	0.349685	-0.544884	0.00520119	-1.78988	0.49923	-0.0489356	1.50928	1	Mother
668	2.43669	1	0	-2.94	-3.21	-0.577331	SMA	2	9	0	Primary 6 or lower	0	4		0	1	0	0	0	0	0	1	1	-0.257992	-0.147889	-0.268222	-0.317807	-0.0663684	-0.5333	-0.396973	-0.687656	-0.85054	1	Mother	-0.168765	0.128249	-0.52337	-0.0628159	-0.94249	0.31488	-0.266786	0.292463	0.0918731		Mother
668	2.43669	1	6	-2.94	-3.21	-0.577331	SMA	2	9	0	Primary 6 or lower	0	4		0	1	0	0	0	0	0	1	1	-1.05895	-0.395315	-0.553206	-1.19555	-1.03006	-0.211203	-0.173994	-0.210981	-0.7579	7	Other	-0.506816	0.217382	-1.22933	-1.01091	-0.788761	-0.0470113	-1.57033	0.155402	0.272507	1	Other
668	2.43669	1	12	-2.94	-3.21	-0.577331	SMA	2	9	0	Primary 6 or lower	0	4		0	1	0	0	0	0	0	1	1	1.71822	2.34528	2.25005	0.954425	-0.365552	0.205988	0.301381	-0.191863	1.70916	7	Mother	0.251726	-0.222816	1.07523	0.269225	0.813048	-0.463587	0.851321	-0.669125	0.0770562	5	Mother
668	2.43669	1	24	-2.94	-3.21	-0.577331	SMA	2	9	0	Primary 6 or lower	0	4		0	1	0	0	0	0	0	1	1	-0.269053	0.15894	-0.290016	-0.36644	-0.336451	-0.602841	-0.379136	-1.04149	0.675429	7	Mother	-1.01872	-1.02016	-0.854524	-0.394557	-1.47041	-0.677828	-0.110198	-1.61192	-0.563215	5	Mother
669	4.26557	1	0	-2.62	-0.58	-1.58137	SMA	2	6	0	Secondary or higher	1	4		1	1	0	0	0	0	1	1	1	-0.0333372	0.477741	-0.699283	-0.363887	0.313786	-1.57604	-1.64354	-0.597083	-0.542661	1	Mother	-1.05823	-0.824193	-0.882039	-1.06561	-0.858438	-1.25664	-0.769459	-0.377459	-0.91863		Mother
669	4.26557	1	6	-2.62	-0.58	-1.58137	SMA	2	6	0	Secondary or higher	1	4		1	1	0	0	0	0	1	1	1	-0.965436	-0.783536	-0.605287	-0.376304	-0.97819	-1.26258	-1.29059	-0.572677	-0.4597	1	Mother	-1.19763	-0.639638	-1.48141	-1.39896	-1.14762	-1.09258	-1.46112	-0.216416	-0.756868	1	Mother
669	4.26557	1	12	-2.62	-0.58	-1.58137	SMA	2	6	0	Secondary or higher	1	4		1	1	0	0	0	0	1	1	1	1.56794	1.96272	2.5947	0.476954	-0.312641	0.237705	0.439131	-0.551796	0.812316	7	Mother	-1.14371	-0.715648	-1.12248	-1.50349	-0.602988	-1.49731	-1.33531	-0.71242	-0.618473	1	Mother
669	4.26557	1	24	-2.62	-0.58	-1.58137	SMA	2	6	0	Secondary or higher	1	4		1	1	0	0	0	0	1	1	1																							-1.05773	-0.455379	-1.34903	-0.791344
670	7.35661	1	0	-3.16	-1.3	-2.19096	CM	1	10	1	Primary 7	0	4		0	0	0	1	0	0	2	1	1																							-0.0833569	-0.155909	0.820549	-0.732963
670	7.35661	1	6	-3.16	-1.3	-2.19096	CM	1	10	1	Primary 7	0	4		0	0	0	1	0	0	2	1	1																							0.402014	0.464886	1.2651	-0.708059
670	7.35661	1	12	-3.16	-1.3	-2.19096	CM	1	10	1	Primary 7	0	4		0	0	0	1	0	0	2	1	1																							0.729055	1.08571	1.28501	-0.683291
670	7.35661	1	24	-3.16	-1.3	-2.19096	CM	1	10	1	Primary 7	0	4		0	0	0	1	0	0	2	1	1																							-0.991971	-1.11901	-0.375256	-0.636205
671	3.02259	1	0	-0.5	-1.04	-1.58137		3	7	0	Not known		3	0										-0.186022	-0.389657	0.233475	0.0993722	-0.375814	-0.205861	-0.0297807	-0.65864	0.449129	1	Other	-0.106044	0.347664	-0.975253	0.144952	-1.41909	1.05501	-0.511316	1.11771	-0.0379741		Other
671	3.02259	1	6	-0.5	-1.04	-1.58137		3	7	0	Not known		3	0										-0.372636	-0.644916	-0.0609081	0.0867482	-0.361143	-0.729409	-0.508178	-1.08325	-0.667564	1	Other	-0.131698	1.00311	-1.08357	-1.32872	-0.212008	-0.413459	-1.82956	1.91522	0.448647	1	Other
671	3.02259	1	12	-0.5	-1.04	-1.58137		3	7	0	Not known		3	0										-1.1783	-1.23334	-0.743148	-0.358093	-0.999355	-0.173565	-0.0135303	-0.608472	0.619661	1	Other	1.11813	2.24742	-0.0890679	-0.25798	0.571286	0.574607	-0.838082	3.0332	1.58319	1	Other
671	3.02259	1	24	-0.5	-1.04	-1.58137		3	7	0	Not known		3	0										1.68227	0.945386	1.40972	0.478955	1.97124	0.824537	0.982049	-0.106306	1.99999	7	Other	0.8703	1.35977	0.078013	0.754824	-0.411744	0.92915	0.528099	0.212311	1.77169	1	Other
672	2.32444	1	0	-2.02	-3.14	-0.312634	SMA	2	8	0	Primary 6 or lower	0	3		0	0	0	0		0	0	1	1	0.596774	0.504075	1.6601	0.116963	-0.396257	0.2881	0.279684	0.205629	0.331601	1	Mother	0.340149	0.203164	0.0571683	0.659536	-0.333575	1.36768	0.119076	0.889565	-0.106054		Mother
672	2.32444	1	6	-2.02	-3.14	-0.312634	SMA	2	8	0	Primary 6 or lower	0	3		0	0	0	0		0	0	1	1	0.90177	0.242723	1.3584	0.969187	0.270495	0.237798	0.350489	-0.220879	-0.791546	1	Mother	-0.308423	-0.676137	0.182848	0.0614567	-0.20432	-0.113545	0.257139	-0.226802	-0.759587	1	Mother
672	2.32444	1	12	-2.02	-3.14	-0.312634	SMA	2	8	0	Primary 6 or lower	0	3		0	0	0	0		0	0	1	1	0.214802	0.652049	1.05775	-1.20231	-0.0423981	1.26607	1.3935	0.251729	1.68934	7	Mother	0.261076	-0.734717	0.676632	0.989635	0.566736	1.67757	0.396836	-0.707596	-0.605914	1	Mother
672	2.32444	1	24	-2.02	-3.14	-0.312634	SMA	2	8	0	Primary 6 or lower	0	3		0	0	0	0		0	0	1	1	-0.532345	-0.530453	-0.703461	-1.22722	0.639746	-0.621333	-0.259223	-1.49701	-0.546349	7	Mother	-1.01151	-0.832395	-1.25461	-0.565273	-1.50483	-0.173755	-0.775995	-1.0184	-0.603656	5	Mother
673	7.52909	1	0	-2.29	-2.46	-0.514224	CM	1	8	1	Secondary or higher	0	4		0	0	0	1	0	0	2	1	1																							-0.87108	-0.157949	-1.2952	-0.724389
673	7.52909	1	6	-2.29	-2.46	-0.514224	CM	1	8	1	Secondary or higher	0	4		0	0	0	1	0	0	2	1	1																							0.0891051	0.462846	-0.00159718	-0.3285
673	7.52909	1	12	-2.29	-2.46	-0.514224	CM	1	8	1	Secondary or higher	0	4		0	0	0	1	0	0	2	1	1																							1.52445	2.02353	0.0190791	1.18116
673	7.52909	1	24	-2.29	-2.46	-0.514224	CM	1	8	1	Secondary or higher	0	4		0	0	0	1	0	0	2	1	1																							-0.67191	-0.180905	-1.21764	-0.256918
674	2.35729	1	0	-3.44	-2.38	1.80494	SMA	2	11	0	Secondary or higher	1	4		0	0	0	0	0	0	0	1	1	0.848969	-0.495415	0.886472	-0.315806	2.21752	1.49053	1.11731	2.00495	0.337131	7	Mother	1.78998	1.50195	1.77697	1.05227	2.23669	1.65117	0.548236	0.58341	1.83771		Mother
674	2.35729	1	6	-3.44	-2.38	1.80494	SMA	2	11	0	Secondary or higher	1	4		0	0	0	0	0	0	0	1	1	2.8904	2.2565	1.36363	1.40044	3.21071	0.00240784	0.0771449	-0.219523	2.21566	7	Mother	2.24467	2.72576	1.41234	0.96035	1.93757	1.80337	0.265309	2.31728	2.63212	5	Mother
674	2.35729	1	12	-3.44	-2.38	1.80494	SMA	2	11	0	Secondary or higher	1	4		0	0	0	0	0	0	0	1	1	4.43586	2.66452	3.79103	1.38885	4.85719	2.82569	2.64534	2.05037	1.69257	7	Mother	3.41893	3.48277	2.75933	2.13967	3.13318	2.77412	1.45095	2.46759	3.5885	5	Mother
674	2.35729	1	24	-3.44	-2.38	1.80494	SMA	2	11	0	Secondary or higher	1	4		0	0	0	0	0	0	0	1	1	0.965351	0.820479	0.0900083	-0.79707	2.27484	2.3831	2.52701	0.753625	1.86771	1	Mother	2.11137	2.352	2.06428	0.984287	2.14327	0.395028	1.34203	2.17378	2.1581	1	Mother
675	3.69884	1	0	-1.74	-2.76	-0.714437	CM	1	7	0	Primary 6 or lower	0	4		0	0	0	1		0	2	1	1	-1.09559	-0.951966	-0.807379	-0.349608	-1.00922	-0.942609	-0.897665	-0.62515	-0.638067	1	Other	-0.229162	0.600913	-0.669362	-1.52064	0.477213	-0.900215	-1.77728	0.704911	0.506162		Other
675	3.69884	1	6	-1.74	-2.76	-0.714437	CM	1	7	0	Primary 6 or lower	0	4		0	0	0	1		0	2	1	1	-0.295285	0.459897	0.0591984	-1.22494	-0.342704	1.5206	1.25339	1.64447	-0.561558	7	Other	0.113918	0.65416	-0.05709	-1.10542	1.03102	-0.748919	-1.22231	0.536536	0.655342	1	Other
675	3.69884	1	12	-1.74	-2.76	-0.714437	CM	1	7	0	Primary 6 or lower	0	4		0	0	0	1		0	2	1	1	-0.735102	-0.806603	0.92682	-1.23653	-0.982439	1.94889	1.60131	2.11667	0.71691	7	Other	2.28304	3.28243	1.77873	0.327955	2.22663	-0.323257	0.802039	3.22198	2.90038	1	Other
675	3.69884	1	24	-1.74	-2.76	-0.714437	CM	1	7	0	Primary 6 or lower	0	4		0	0	0	1		0	2	1	1	-0.240111	0.356964	0.337532	-1.26171	-0.299975	2.45813	2.44806	1.26732	-0.3159	7	Other	1.89904	2.13627	1.92796	0.301247	2.93264	0.00941188	0.471189	1.64718	2.10083	1	Other
676	5.32786	1	0	-1.97	-1.5	-0.714437	SMA	2	6	1	Primary 6 or lower	0	4		0	0	0	0	0	0	0	1	1	-0.523246	-0.693011	-0.106723	-0.390653	-0.308312	0.379646	0.600522	-0.544474	-0.363834	1	Mother	0.793126	0.626203	1.11738	-0.180804	2.21283	-0.0853759	-0.242808	0.603461	0.557628		Mother
676	5.32786	1	6	-1.97	-1.5	-0.714437	SMA	2	6	1	Primary 6 or lower	0	4		0	0	0	0	0	0	0	1	1	0.16105	0.0594889	0.382441	-0.40376	0.360123	-0.500275	-0.291243	-0.968135	-0.276263	7	Other	-0.440988	0.470151	-1.30764	-0.631469	-1.48349	-0.457293	-0.716623	1.40723	-0.0770322	1	Other
676	5.32786	1	12	-1.97	-1.5	-0.714437	SMA	2	6	1	Primary 6 or lower	0	4		0	0	0	0	0	0	0	1	1																							1.31928	2.67657	-0.494391	0.328553
676	5.32786	1	24	-1.97	-1.5	-0.714437	SMA	2	6	1	Primary 6 or lower	0	4		0	0	0	0	0	0	0	1	1																							0.707366	2.03797	-0.454241	-0.363474
677	2.11362	1	0	-1.61	-3.87	1.54024	SMA	2	20	0	Primary 6 or lower	1	3		0	0	0	0	0	0	0	1	1	0.694958	0.135659	-0.329842	1.4181	0.903976	0.0169584	0.247424	-0.703656	0.296112	1	Mother	-0.902745	-0.226643	-0.97774	-0.558459	-2.31328	-1.42793	0.26585	-1.08068	0.307993		Mother
677	2.11362	1	6	-1.61	-3.87	1.54024	SMA	2	20	0	Primary 6 or lower	1	3		0	0	0	0	0	0	0	1	1	-1.44531	-1.0834	-0.965084	-1.19266	-1.03343	-1.66546	-1.71803	-0.666098	-0.176739	1	Other	-1.27017	-0.878259	-1.01615	-1.81384	-0.394035	-1.72055	-1.60464	-0.832851	-0.731728	1	Other
677	2.11362	1	12	-1.61	-3.87	1.54024	SMA	2	20	0	Primary 6 or lower	1	3		0	0	0	0	0	0	0	1	1	1.34934	1.67983	2.25527	-0.342089	0.288452	2.12609	2.10954	1.15776	0.512733	7	Other	0.870373	1.07392	1.57149	-0.483224	2.10124	-1.54465	0.440134	1.24117	0.891452	1	Other
677	2.11362	1	24	-1.61	-3.87	1.54024	SMA	2	20	0	Primary 6 or lower	1	3		0	0	0	0	0	0	0	1	1	-1.25765	-1.17545	-0.283749	-1.23115	-0.988692	-1.79541	-1.62301	-1.48928	-0.520078	7	Other	-1.39279	-1.12481	-1.09001	-1.14506	-1.46123	-1.75706	-0.519751	-0.967403	-1.03568	1	Other
679	3.6742	1	0	-0.36	-1.09	-0.54105	SMA	2	9	0	Secondary or higher	1	3		0	1	0	0		1	0	1	1	-0.974536	0.0488295	-0.812079	-1.21287	-1.00994	-0.826557	-0.901435	-0.176948	-0.642215	1	Mother	-1.01255	-0.811751	-0.676055	-1.40235	-0.169943	-1.4535	-1.1556	-0.57071	-0.79058		Mother
679	3.6742	1	6	-0.36	-1.09	-0.54105	SMA	2	9	0	Secondary or higher	1	3		0	1	0	0		1	0	1	1	-0.411965	0.134568	-0.709205	-0.362577	-0.340941	-0.865353	-0.818899	-0.599659	-0.551418	1	Mother	-0.802174	-0.492814	-0.651758	-1.59216	0.407575	-1.27395	-1.62369	-0.394458	-0.452459	1	Mother
679	3.6742	1	12	-0.36	-1.09	-0.54105	SMA	2	9	0	Secondary or higher	1	3		0	1	0	0		1	0	1	1	-0.464074	-0.1072	-0.597454	-0.377339	-0.323785	-0.537914	-0.451707	-0.570643	0.748251	7	Mother	-0.352565	-0.624259	0.485032	-0.876289	1.21152	-1.35145	-0.400478	-0.519888	-0.582307	1	Mother
679	3.6742	1	24	-0.36	-1.09	-0.54105	SMA	2	9	0	Secondary or higher	1	3		0	1	0	0		1	0	1	1	-0.953983	-0.608143	-0.394839	-1.26799	-0.619281	-1.09697	-0.982983	-0.967457	-0.273959	7	Mother	-1.15416	-0.92816	-1.18172	-1.38877	-0.412548	-0.997822	-1.55125	-1.12343	-0.716866	5	Mother
680	2.77618	2	0	-1.1	-1.16	1.27555		3	17	0	Secondary or higher		3	0										-0.826695	-1.37931	-0.343627	0.243484	-0.729818	-0.832265	-1.31808	1.1619	-1.02856	1	Mother	-1.39423	-1.23564	-1.01229	-1.15831	-1.28436	-1.43169	-0.731161	-1.2395	-1.01221		Mother
680	2.77618	2	6	-1.1	-1.16	1.27555		3	17	0	Secondary or higher		3	0										-1.01365	-1.3001	-1.02848	-0.632953	-0.0620246	-0.398226	-0.270464	-0.61111	-0.944676	1	Mother	-0.923528	-0.698175	-0.876938	-0.981613	-0.718315	-0.720725	-1.00183	-0.125995	-0.848652	1	Mother
680	2.77618	2	12	-1.1	-1.16	1.27555		3	17	0	Secondary or higher		3	0										-0.708987	0.112629	-0.940748	-0.212601	-1.02836	-0.688438	-0.616379	-0.588331	-0.266726	7	Mother	-1.68371	-1.46155	-1.60744	-1.45364	-1.44352	-1.11269	-1.49362	-1.24326	-1.342	1	Mother
680	2.77618	2	24	-1.1	-1.16	1.27555		3	17	0	Secondary or higher		3	0										-1.57887	-1.40304	-0.750145	-1.5336	-0.999099	-1.6162	-1.43482	-1.43769	-0.0984989	7	Mother	-1.95716	-1.55513	-2.06924	-1.7344	-1.80463	-1.32511	-1.82447	-1.55048	-1.33615	5	Mother
681	2.05886	2	0	-0.4	0.03	-0.577331		3	11	0	Primary 7		3	0										-1.03889	-0.823533	-0.87039	-0.602324	-0.750822	-1.17943	-1.56662	0.676956	-0.548795	1	Mother	-0.347548	0.600887	-1.08492	-0.396473	-1.91159	-0.307767	-0.316166	0.744335	0.524236		Mother
681	2.05886	2	6	-0.4	0.03	-0.577331		3	11	0	Primary 7		3	0										-1.21978	-0.736489	-1.1559	-0.18418	-1.38799	-1.69599	-1.62159	-1.09362	-1.05713	1	Mother	-0.852476	-0.831396	-0.691776	-0.964455	-0.264659	-0.398026	-1.20117	-0.344297	-0.906847	1	Mother
681	2.05886	2	12	-0.4	0.03	-0.577331		3	11	0	Primary 7		3	0										-0.92118	-2.01082	0.482218	-0.194527	-0.722763	-0.676353	-0.726147	-0.174433	1.41408	7	Mother	-0.415942	0.141071	-0.335815	-0.945849	-0.36336	-1.35149	-0.449592	0.740581	-0.127719	1	Mother
681	2.05886	2	24	-0.4	0.03	-0.577331		3	11	0	Primary 7		3	0										-1.5429	-1.18216	-0.497016	-1.51553	-1.3467	-1.36461	-1.12829	-1.47321	-0.819773	7	Mother	-1.79479	-1.4729	-1.89746	-1.35364	-2.00502	-1.01882	-1.40948	-1.78489	-1.08836	5	Mother
682	5.47844	1	0	-0.75	0.17	-1.2346	CM	1	8	1	Primary 6 or lower	0	4		0	0	0	1	0	0	2	0	0	0.239728	0.335639	0.311944	-0.394447	0.3493	0.0429975	0.484798	-1.43586	-0.338484	7	Mother	-0.142996	-0.25303	-0.185978	-0.000379416	-0.0927747	0.237296	-0.197876	0.0188846	-0.359435		Mother
682	5.47844	1	6	-0.75	0.17	-1.2346	CM	1	8	1	Primary 6 or lower	0	4		0	0	0	1	0	0	2	0	0	-0.319125	0.0803794	-0.372385	-0.407071	-0.289232	0.357698	0.561469	-0.512204	0.946897	1	Mother	0.770937	0.636318	0.561141	1.1935	-0.166237	0.949172	1.20969	1.76707	-0.0338958	1	Mother
682	5.47844	1	12	-0.75	0.17	-1.2346	CM	1	8	1	Primary 6 or lower	0	4		0	0	0	1	0	0	2	0	0																							1.4809	1.10789	0.785541	1.4494
682	5.47844	1	24	-0.75	0.17	-1.2346	CM	1	8	1	Primary 6 or lower	0	4		0	0	0	1	0	0	2	0	0																							-0.555691	-0.784022	-0.872863	0.385846
684	6.73238	1	0	2.39	1.41	-0.209363	CM	1	14	1	Primary 6 or lower	0	3		0	0	0	1	0	0	2	0	0																							-0.25478	-0.148527	-0.477981	-0.0220192
684	6.73238	1	6	2.39	1.41	-0.209363	CM	1	14	1	Primary 6 or lower	0	3		0	0	0	1	0	0	2	0	0																							-0.402438	-0.154484	-0.457852	-0.367965
684	6.73238	1	12	2.39	1.41	-0.209363	CM	1	14	1	Primary 6 or lower	0	3		0	0	0	1	0	0	2	0	0																							0.39936	-0.160345	0.411007	0.769624
684	6.73238	1	24	2.39	1.41	-0.209363	CM	1	14	1	Primary 6 or lower	0	3		0	0	0	1	0	0	2	0	0																							0.579148	-0.485782	1.30087	0.820384
685	2.15469	1	0	-3.1	-2.19	-0.0479372	SMA	2	9	0	Secondary or higher	1	4		0	1	0	0	0	0	1	1	1	-0.540791	-0.527621	-0.322009	-0.310701	-0.401227	-0.575627	-0.440126	-0.701622	0.303025	1	Mother	0.329209	0.841314	-0.599967	0.345289	-1.02127	1.31118	-0.35093	0.834095	0.804718		Mother
685	2.15469	1	6	-3.1	-2.19	-0.0479372	SMA	2	9	0	Secondary or higher	1	4		0	1	0	0	0	0	1	1	1	-0.479919	-1.11865	0.162455	0.108754	-0.386717	-0.261748	-0.08676	-0.67708	-0.81459	1	Mother	0.854118	1.2608	0.878899	-0.24114	1.25141	-0.43166	0.00661403	2.58049	0.484133	1	Mother
685	2.15469	1	12	-3.1	-2.19	-0.0479372	SMA	2	9	0	Secondary or higher	1	4		0	1	0	0	0	0	1	1	1	1.18322	1.62543	1.02016	-1.19735	1.58484	2.67348	2.19594	2.9385	0.455121	7	Mother	1.17904	2.46615	0.623088	-0.477558	0.725093	-1.11349	0.128339	2.39691	2.22885	5	Mother
685	2.15469	1	24	-3.1	-2.19	-0.0479372	SMA	2	9	0	Secondary or higher	1	4		0	1	0	0	0	0	1	1	1
686	2.40383	1	0	-2.76	-2.41	-1.37142	SMA	2	9	0	Primary 6 or lower	0	4		1	1	0	0		0	0	1	1	0.482448	0.181792	-0.274489	0.546904	0.912474	-0.657982	-0.957068	0.658984	-0.856071	1	Other	-0.18158	-0.46882	-0.410088	0.433639	-0.738243	1.39412	-0.276589	-0.352057	-0.402156		Other
686	2.40383	1	6	-2.76	-2.41	-1.37142	SMA	2	9	0	Primary 6 or lower	0	4		1	1	0	0		0	0	1	1	1.28309	2.5988	-0.187281	-0.76044	1.57907	-0.230106	-0.332033	0.232205	-0.779101	7	Other	-0.27959	0.754983	-0.896924	-0.928541	-1.03737	-0.906567	-0.769194	1.06492	0.553331	5	Other
686	2.40383	1	12	-2.76	-2.41	-1.37142	SMA	2	9	0	Primary 6 or lower	0	4		1	1	0	0		0	0	1	1	3.07569	3.67533	1.84861	0.955942	2.2455	-0.042552	-0.124137	0.254577	0.497984	7	Other	-1.48513	-1.29795	-1.14084	-1.78456	-0.484323	-1.57381	-1.68279	-1.0057	-1.23137	1	Other
686	2.40383	1	24	-2.76	-2.41	-1.37142	SMA	2	9	0	Primary 6 or lower	0	4		1	1	0	0		0	0	1	1	-0.0272837	0.150671	0.479954	-0.79707	-0.011373	-0.371149	-0.525864	0.304202	-0.534365	7	Other	-0.0994247	-0.220972	0.108992	0.0951021	-0.204399	-0.150059	0.293637	-0.361354	-0.0970448	5	Other
687	2.9295	2	0	-0.9	-0.66	0.21676		3	12	0	Primary 7		3	0										-0.311544	-0.0153251	0.075562	-0.19232	-0.725329	-1.408	-1.71092	0.270651	-1.00275	1	Mother	-2.10821	-1.64603	-2.07049	-2.12015	-1.66838	-1.65319	-2.15316	-1.50629	-1.44513		Mother
687	2.9295	2	6	-0.9	-0.66	0.21676		3	12	0	Primary 7		3	0										-0.994476	-0.605488	-0.998713	0.226997	-1.36386	-1.8118	-1.91179	-0.603381	-0.918404	1	Mother	-0.862657	-0.990592	-0.467932	-0.926273	-0.0344478	-0.668775	-0.955269	-0.708782	-0.958509	1	Mother
687	2.9295	2	12	-0.9	-0.66	0.21676		3	12	0	Primary 7		3	0										-1.44405	-1.2148	-0.926127	-0.646474	-1.35272	-1.63493	-1.43725	-1.48338	-0.85434	1	Mother	-1.37746	-1.19893	-1.58662	-1.1724	-1.20868	-0.269544	-1.68043	-0.584422	-1.31684	1	Mother
687	2.9295	2	24	-0.9	-0.66	0.21676		3	12	0	Primary 7		3	0										-1.56844	-1.38954	-0.733956	-1.53574	-0.996614	-1.60346	-1.5606	-0.98406	-0.68473	9	Mother	-1.64771	-1.52334	-1.55736	-1.32322	-1.35408	-1.02431	-1.37979	-1.52275	-1.30829	5	Mother
688	2.63381	2	0	-0.98	-1.69	-0.842027		3	9	0	Primary 6 or lower		3	1										-1.71274	-1.40194	-1.15067	-1.48069	-1.06059	0.942614	0.8804	0.705429	-1.05253	1	Other	0.0977894	-0.470284	0.782129	0.696597	-0.0435863	0.156175	1.11346	-0.969135	-0.0924513		Other
688	2.63381	2	6	-0.98	-1.69	-0.842027		3	9	0	Primary 6 or lower		3	1										-0.286321	-0.652492	-0.275219	0.234448	-0.0661131	-0.299433	-0.153064	-0.618025	-0.968181	1	Other	-0.259483	-1.21828	0.429397	0.366162	0.523224	0.868052	0.00489234	-0.805408	-1.21665	1	Other
688	2.63381	2	12	-0.98	-1.69	-0.842027		3	9	0	Primary 6 or lower		3	1										0.886221	1.09427	0.591359	0.222996	0.600398	-0.231218	-0.083516	-0.595517	0.309365	7	Other	0.0283277	-1.16503	0.919463	0.908407	0.650184	1.01935	0.769539	-0.339999	-1.38963	1	Other
688	2.63381	2	24	-0.98	-1.69	-0.842027		3	9	0	Primary 6 or lower		3	1										-0.479979	0.248417	-0.777821	-0.666065	-0.350145	-0.799726	-0.485661	-1.44487	1.67863	7	Other	-1.0189	-0.907748	-1.13101	-0.515591	-1.41832	-0.283243	-0.609702	-0.330333	-1.06162	1	Other
689	4.08761	2	0	-2.55	-2.37	-1.40798	SMA	2	6	1	Primary 6 or lower	1	4		1	1	0	0	1	0	1	1	1	1.31967	2.1782	0.686399	-0.653441	1.26819	0.80157	0.547803	1.22685	-0.207271	1	Mother	-0.606362	-1.09538	-0.289452	-0.0581296	-0.277739	0.367597	-0.339846	-0.494059	-1.22607		Mother
689	4.08761	2	6	-2.55	-2.37	-1.40798	SMA	2	6	1	Primary 6 or lower	1	4		1	1	0	0	1	0	1	1	1	-1.10374	-0.425743	-0.783043	-0.665375	-1.33075	-0.564336	-0.489851	-0.547383	-0.728054	1	Mother	-1.3612	-1.50277	-0.771827	-0.779352	-1.21255	-1.38253	-0.198515	-1.28996	-1.39277	2	Mother
689	4.08761	2	12	-2.55	-2.37	-1.40798	SMA	2	6	1	Primary 6 or lower	1	4		1	1	0	0	1	0	1	1	1	-0.178683	0.317182	-0.695313	-0.676964	0.315724	0.582449	0.551904	0.374241	-0.650624	7	Mother	-0.242208	-0.277938	-0.280273	0.0188875	-0.443784	0.133305	-0.0612692	0.127919	-0.436379	1	Mother
689	4.08761	2	24	-2.55	-2.37	-1.40798	SMA	2	6	1	Primary 6 or lower	1	4		1	1	0	0	1	0	1	1	1																							-1.11622	-1.52441	-0.93095	-0.0358106
690	2.40657	1	0	-1.16	-1.69	-0.312634	SMA	2	9	0	Secondary or higher	0	3		0	1	0	0	0	0	0	1	1	0.358705	0.182227	1.28582	-0.748989	0.259351	-0.178571	0.0147191	-0.689148	1.54647	1	Mother	-0.401591	-0.701701	0.0794786	0.180557	-0.737478	-0.240232	0.562941	-0.351162	-0.723421		Mother
690	2.40657	1	6	-1.16	-1.69	-0.312634	SMA	2	9	0	Secondary or higher	0	3		0	1	0	0	0	0	0	1	1	-0.202838	-0.411417	-0.962473	0.534762	0.273381	-0.106658	0.088038	-0.66542	-0.774953	1	Mother	-0.822677	-1.10704	-0.0347913	-0.411697	-0.603635	-1.17091	0.286549	-0.511486	-1.21048	1	Mother
690	2.40657	1	12	-1.16	-1.69	-0.312634	SMA	2	9	0	Secondary or higher	0	3		0	1	0	0	0	0	0	1	1	0.726927	1.34231	-0.0875404	0.522207	0.287971	-0.0318677	-0.252011	0.707524	-0.69107	7	Mother	0.753426	0.132144	0.83379	1.28932	0.389259	1.7204	0.854589	0.602022	-0.0804309	1	Mother
690	2.40657	1	24	-1.16	-1.69	-0.312634	SMA	2	9	0	Secondary or higher	0	3		0	1	0	0	0	0	0	1	1	-0.515194	-0.173353	0.103063	-1.23074	-0.33597	-1.55837	-1.48676	-1.04067	-0.522843	7	Mother	-1.73082	-1.24792	-2.07212	-1.53197	-1.89267	-0.944903	-1.78272	-1.28966	-1.04107	5	Mother
691	8.08487	1	0	-1.3	-1.39	-0.209363	CM	1	15	1	Primary 6 or lower	0	4		0	0	0	1	0	0	2	0	0																							-0.85937	-0.791242	-1.273	0.0452075
691	8.08487	1	6	-1.3	-1.39	-0.209363	CM	1	15	1	Primary 6 or lower	0	4		0	0	0	1	0	0	2	0	0																							0.897191	0.453457	-0.818929	2.30786
691	8.08487	1	12	-1.3	-1.39	-0.209363	CM	1	15	1	Primary 6 or lower	0	4		0	0	0	1	0	0	2	0	0																							0.900883	0.451385	-0.811928	2.31657
691	8.08487	1	24	-1.3	-1.39	-0.209363	CM	1	15	1	Primary 6 or lower	0	4		0	0	0	1	0	0	2	0	0																							-1.45213	-1.44059	-1.19653	-0.601639
692	5.70021	1	0	-0.86	0	-0.02089	CM	1	15	1	Secondary or higher	0	4		0	0	0	1		0	2	0	0	-0.229349	0.705795	-0.425649	-0.400035	-0.624011	0.555283	0.518735	0.37281	1.5004	1	Mother	0.109313	-0.286934	0.11867	0.332315	0.396024	0.856208	-0.131704	0.0913538	-0.447724		Mother
692	5.70021	1	6	-0.86	0	-0.02089	CM	1	15	1	Secondary or higher	0	4		0	0	0	1		0	2	0	0																							-0.424127	0.48441	-1.34804	-0.419134
692	5.70021	1	12	-0.86	0	-0.02089	CM	1	15	1	Secondary or higher	0	4		0	0	0	1		0	2	0	0																							-0.255357	0.165157	-0.479075	-0.394366
692	5.70021	1	24	-0.86	0	-0.02089	CM	1	15	1	Secondary or higher	0	4		0	0	0	1		0	2	0	0																							-0.70952	-1.09987	-0.43991	0.0253389
694	2.22313	1	0	0.96	-0.7	-1.63612		3	6	0	Not known		4	1										-1.15278	-1.18655	-0.6989	-0.312426	-1.05243	0.512395	0.541716	0.200612	-0.88649	1	Mother	0.908605	0.9839	1.37391	-0.0115182	1.55894	-0.573841	0.508206	0.53957	1.14935		Mother
694	2.22313	1	6	0.96	-0.7	-1.63612		3	6	0	Not known		4	1										-1.46381	-1.77715	-0.993805	-0.324981	-1.03784	-0.490563	-0.908468	1.12413	-0.802607	1	Mother	0.329185	0.23488	0.409412	-0.342924	1.27129	0.409668	-0.810858	0.38551	0.185335	1	Mother
694	2.22313	1	12	0.96	-0.7	-1.63612		3	6	0	Not known		4	1										-0.910992	-0.699318	-0.126183	-0.768511	-1.02437	1.73397	1.65972	1.14691	4.67949	7	Mother	0.287513	0.524084	0.656553	-1.19603	2.04006	-1.07247	-1.09297	0.535816	0.497394	1	Mother
694	2.22313	1	24	0.96	-0.7	-1.63612		3	6	0	Not known		4	1										-1.40864	-1.21027	-0.715472	-1.22563	-0.995106	-1.34928	-1.10146	-1.50013	-0.556949	7	Mother	-1.75458	-1.08988	-1.88274	-1.98489	-1.52242	-1.82998	-1.84317	-1.35587	-0.785407	5	Other
695	3.80561	2	0	-0.47	-1.85	-0.02089	SMA	2	9	1	Secondary or higher	0	4		0	1	0	0	1	0	0	1	1	-0.824322	-0.210959	-0.927171	-0.646336	-0.699675	-1.15675	-0.883019	-1.48365	-0.855262	1	Other	-1.32432	-1.20099	-1.3437	-1.30137	-0.783364	-0.54391	-1.68206	-1.22	-0.996473		Other
695	3.80561	2	6	-0.47	-1.85	-0.02089	SMA	2	9	1	Secondary or higher	0	4		0	1	0	0	1	0	0	1	1	-1.0143	-1.14038	-0.0569383	-1.09021	-0.685806	0.351336	0.577131	-0.561348	-0.775527	1	Mother	-0.31053	-0.906655	0.251427	0.390911	-0.224202	0.158853	0.556052	-0.114539	-1.16317	1	Mother
695	3.80561	2	12	-0.47	-1.85	-0.02089	SMA	2	9	1	Secondary or higher	0	4		0	1	0	0	1	0	0	1	1	0.0338271	0.605953	-0.750667	1.05811	-0.672578	1.25739	1.47886	-0.089554	0.501559	7	Mother	0.307832	0.198145	0.618544	-0.211052	1.18254	-0.235849	-0.147865	0.0330828	0.27377	1	Mother
695	3.80561	2	24	-0.47	-1.85	-0.02089	SMA	2	9	1	Secondary or higher	0	4		0	1	0	0	1	0	0	1	1	0.652562	1.43418	-0.170639	-1.55864	1.64281	0.329221	0.659997	-0.939044	0.669325	7	Mother	-0.0772306	-0.598176	0.889238	0.015322	0.82066	-0.994265	0.778536	-0.908822	-0.365603	1	Mother
696	1.77413	2	0	-1.35	-1.95	-1.37142	SMA	2	10	0	Secondary or higher	0	4		0	0	1	0	1	0	1	1	1	0.16693	-0.868795	1.02503	-0.59515	0.873848	-0.862917	-0.777591	-0.685412	-1.19725	1	Mother	0.370437	0.494256	-0.306823	0.645793	-0.710588	1.77779	-0.191449	0.96818	0.269692		Mother
696	1.77413	2	6	-1.35	-1.95	-1.37142	SMA	2	10	0	Secondary or higher	0	4		0	0	1	0	1	0	1	1	1	1.47465	0.557429	4.24852	0.255005	-0.416605	0.895356	0.970986	0.240414	1.29655	7	Mother	1.02511	1.28306	0.818813	-0.558292	2.42955	0.596448	-1.28695	0.195546	1.73718	5	Mother
696	1.77413	2	12	-1.35	-1.95	-1.37142	SMA	2	10	0	Secondary or higher	0	4		0	0	1	0	1	0	1	1	1	2.63811	1.28773	3.54121	0.245416	2.53395	1.19198	1.30676	0.259261	1.36061	7	Mother	1.89205	1.77643	1.411	1.60908	1.25531	2.3584	0.92339	1.27058	1.8621	5	Mother
696	1.77413	2	24	-1.35	-1.95	-1.37142	SMA	2	10	0	Secondary or higher	0	4		0	0	1	0	1	0	1	1	1
698	4.25462	2	0	-1.43	-0.8	-0.194277		3	10	0	Secondary or higher		4	1										-0.893247	-1.1443	-0.84153	0.206233	-0.686527	-0.84986	-0.814309	-0.562569	-0.179156	1	Mother	0.122018	0.136695	0.122528	0.128121	-0.0176609	0.15065	0.129344	0.828085	-0.204763		Mother
698	4.25462	2	6	-1.43	-0.8	-0.194277		3	10	0	Secondary or higher		4	1										2.39403	1.61415	1.98313	-1.10215	3.90048	2.09893	2.31482	0.360953	2.90732	7	Mother	0.316375	0.323301	0.746699	0.0507681	0.548384	-0.773645	0.697383	0.990916	-0.0412041	1	Mother
698	4.25462	2	12	-1.43	-0.8	-0.194277		3	10	0	Secondary or higher		4	1										1.45755	1.68683	0.900502	-0.249783	1.62766	0.131805	0.580812	-1.41409	-0.018303	7	Mother	0.163095	-0.324146	0.137657	0.593984	0.249261	1.28637	-0.00490033	0.189652	-0.535453	1	Mother
698	4.25462	2	24	-1.43	-0.8	-0.194277		3	10	0	Secondary or higher		4	1																																-1.1108	-1.21409	-0.920667	-0.394004
699	2.39014	2	0	-0.99	-1.36	-0.0479372		3	12	0	Secondary or higher		4	0										-1.86675	-1.44068	-1.19715	-1.47455	-1.39432	-1.72846	-1.51593	-1.55375	-1.09355	7	Mother	-1.32373	-0.795442	-1.48376	-1.29521	-1.60562	-1.01511	-1.26571	-0.414977	-0.816761		Mother
699	2.39014	2	6	-0.99	-1.36	-0.0479372		3	12	0	Secondary or higher		4	0										-0.0660762	-0.688615	1.63117	-1.48759	0.253834	-0.69279	-0.604139	-0.629279	-1.00644	7	Mother	-1.8404	-1.06947	-1.95424	-1.87387	-2.10135	-1.93303	-1.53066	-1.51345	-0.646911	1	Mother
699	2.39014	2	12	-0.99	-1.36	-0.0479372		3	12	0	Secondary or higher		4	0										-0.372061	-0.602877	1.3441	-1.50118	-0.383575	-1.45008	-1.21544	-1.50141	-0.915639	1	Mother	-1.29841	-1.21835	-0.707882	-1.55558	-0.243283	-1.75348	-1.16004	-1.3372	-0.953117	1	Mother
[truncated: 657 more rows]
[truncated: 18 more columns]

## Sheet: Long Codebook
Variable	Label
studyid	StudyID
agefin00	Age at enrollment
sex	Sex (Male=1, Female=2)
visit	Visit (0, 6, 12, 24)
haz	height-for-age z score at enrollment
waz	weight-for-age z score at enrollment
zhome	HOME z score
[truncated: 61 more rows]
